# Supplementary material for: Transcriptomic Analysis Reveals Differentially Expressed Circular RNAs Associated with Fecundity in the Sheep Hypothalamus with Different FecB Genotypes
Source: MDPI journal article supplement (doi:10.3390/ani14020198), 2024-01-07

Figure S1 Sanger sequencing results of the RT-PCR products of circRNAs

Sanger sequencing results of the RT-PCR product of oar\_circ\_0025922

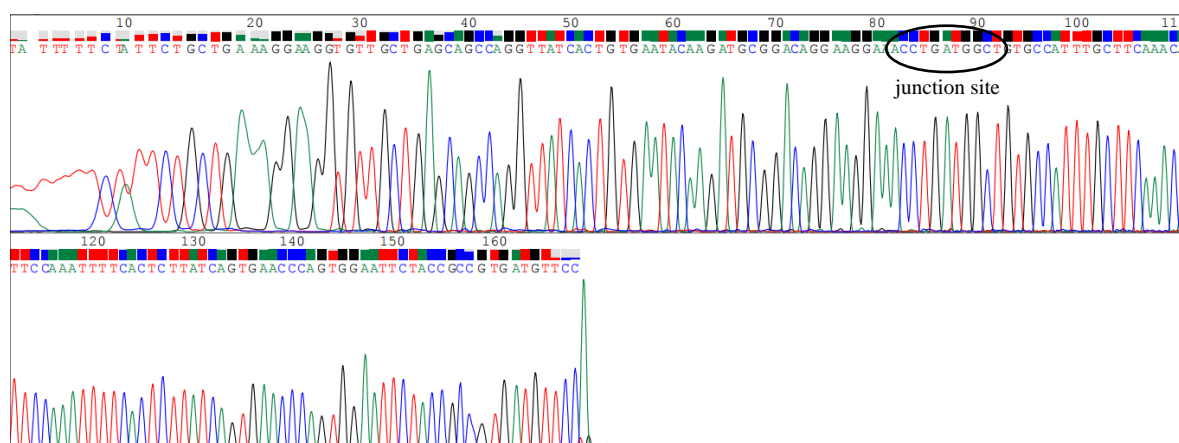

Sanger sequencing results of the RT-PCR product of oar\_circ\_0001768

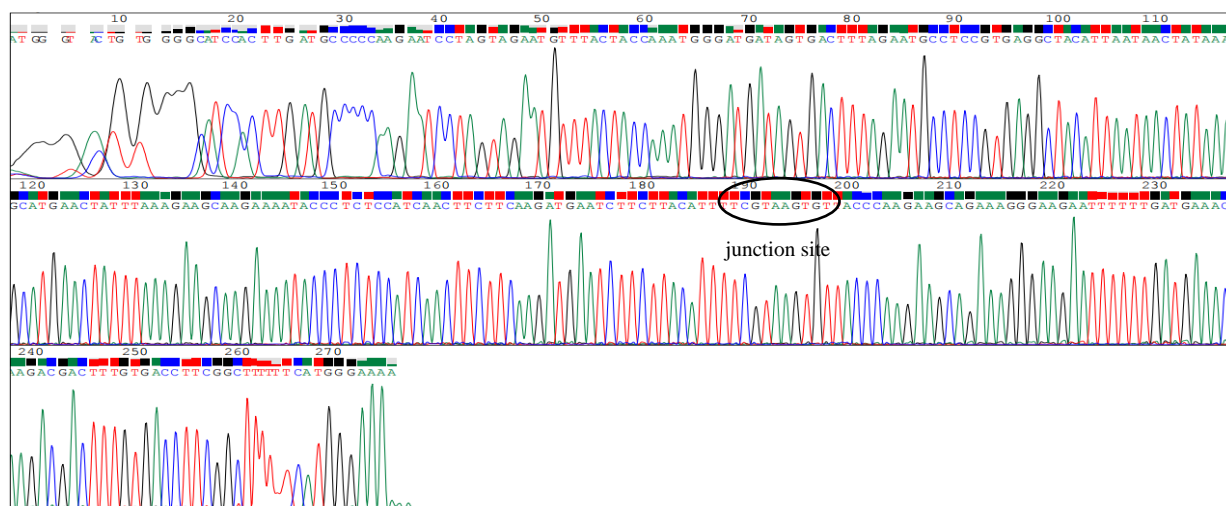

Sanger sequencing results of the RT-PCR product of oar\_circ\_0000994

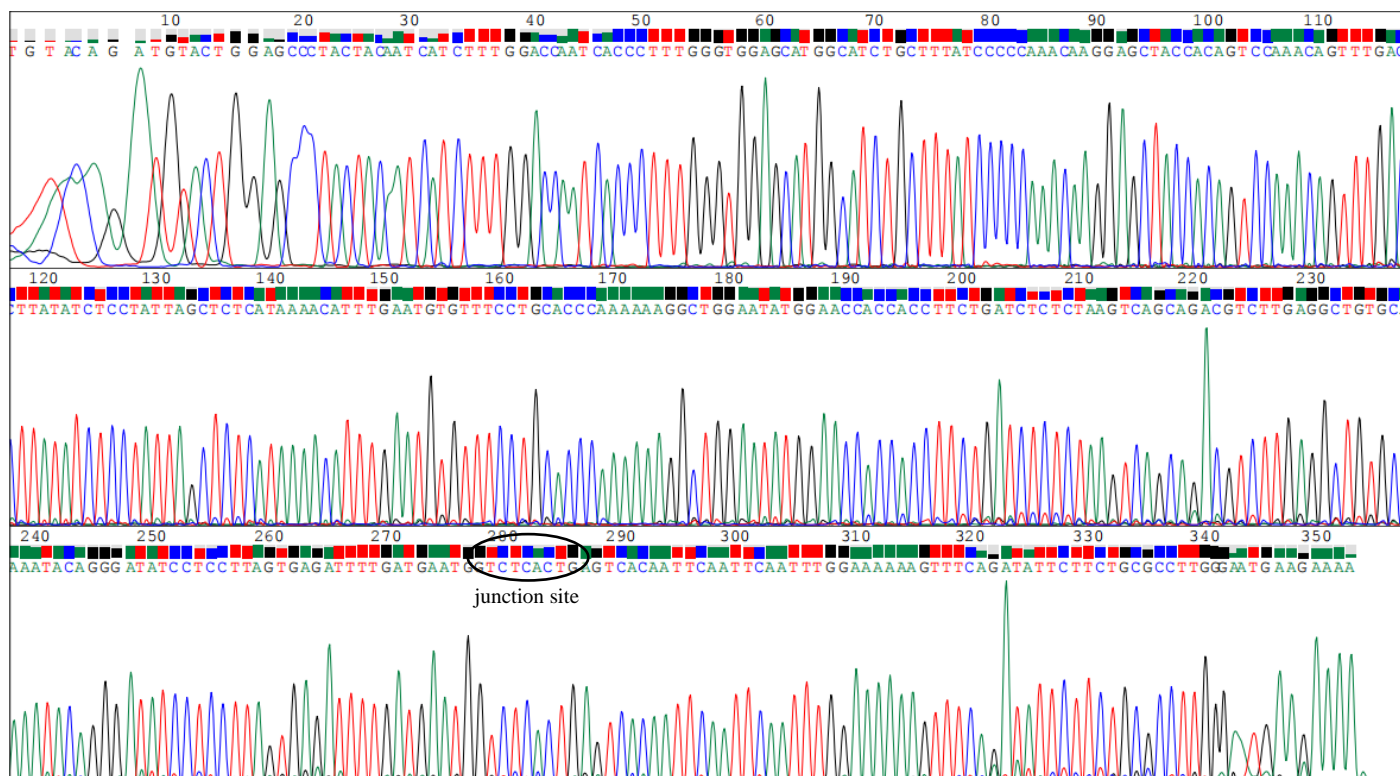

Sanger sequencing results of the RT-PCR product of oar\_circ\_0032202

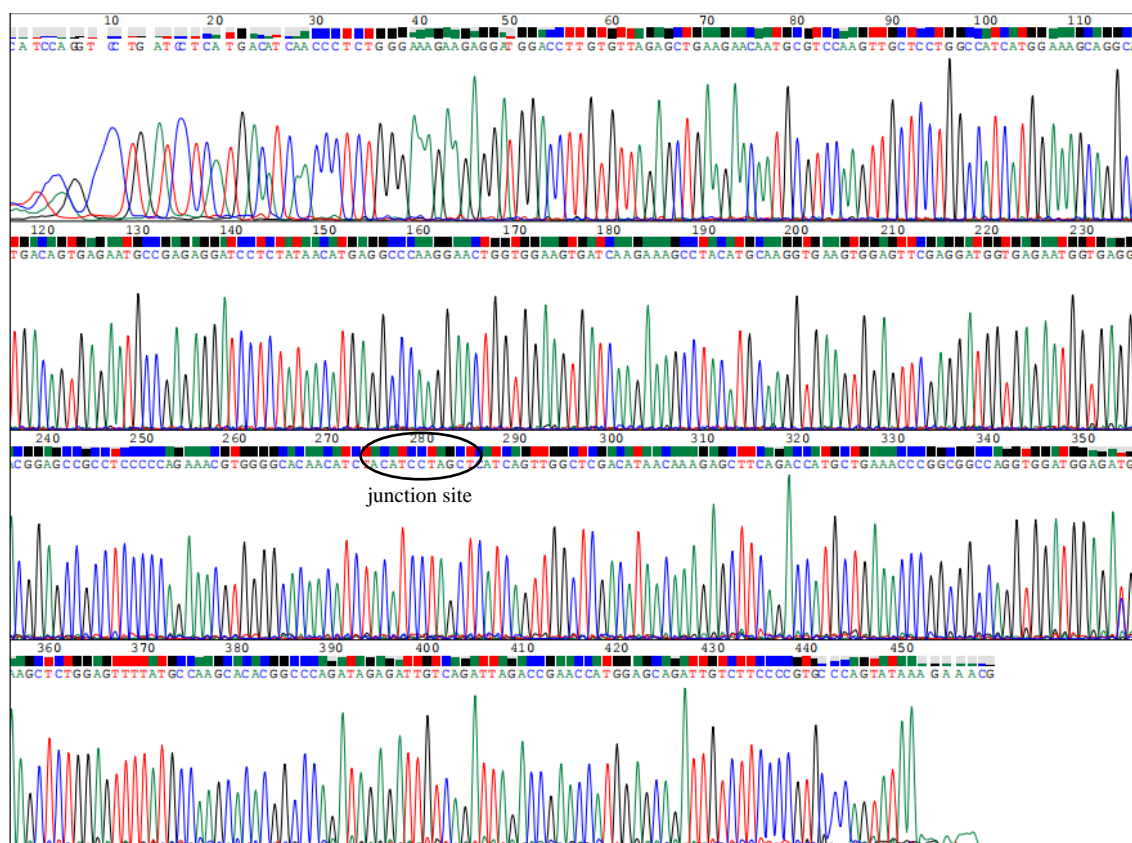

Sanger sequencing results of the RT-PCR product of oar\_circ\_0030328

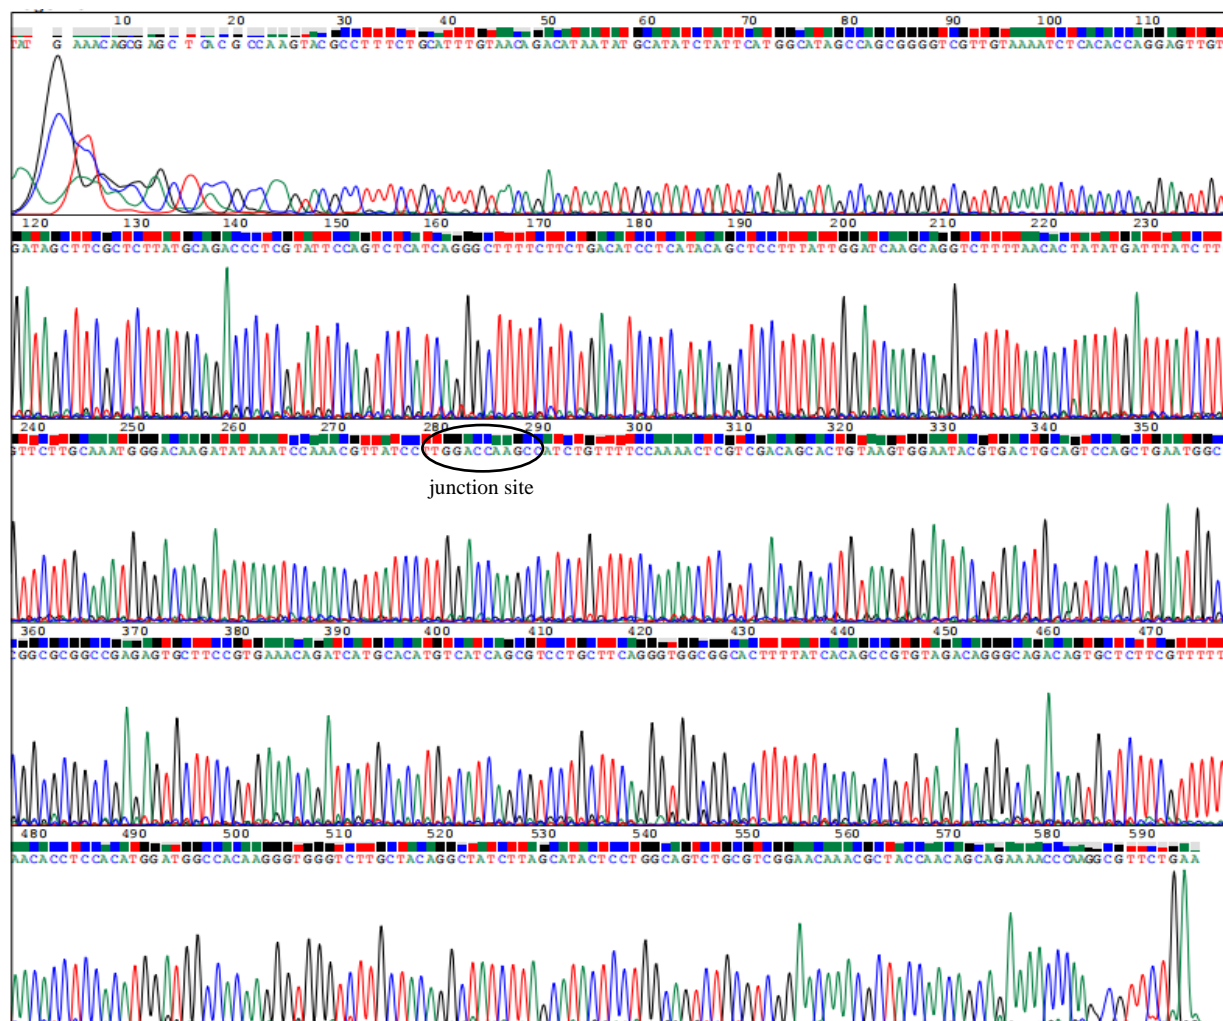

Sanger sequencing results of the RT-PCR product of oar\_circ\_0007733

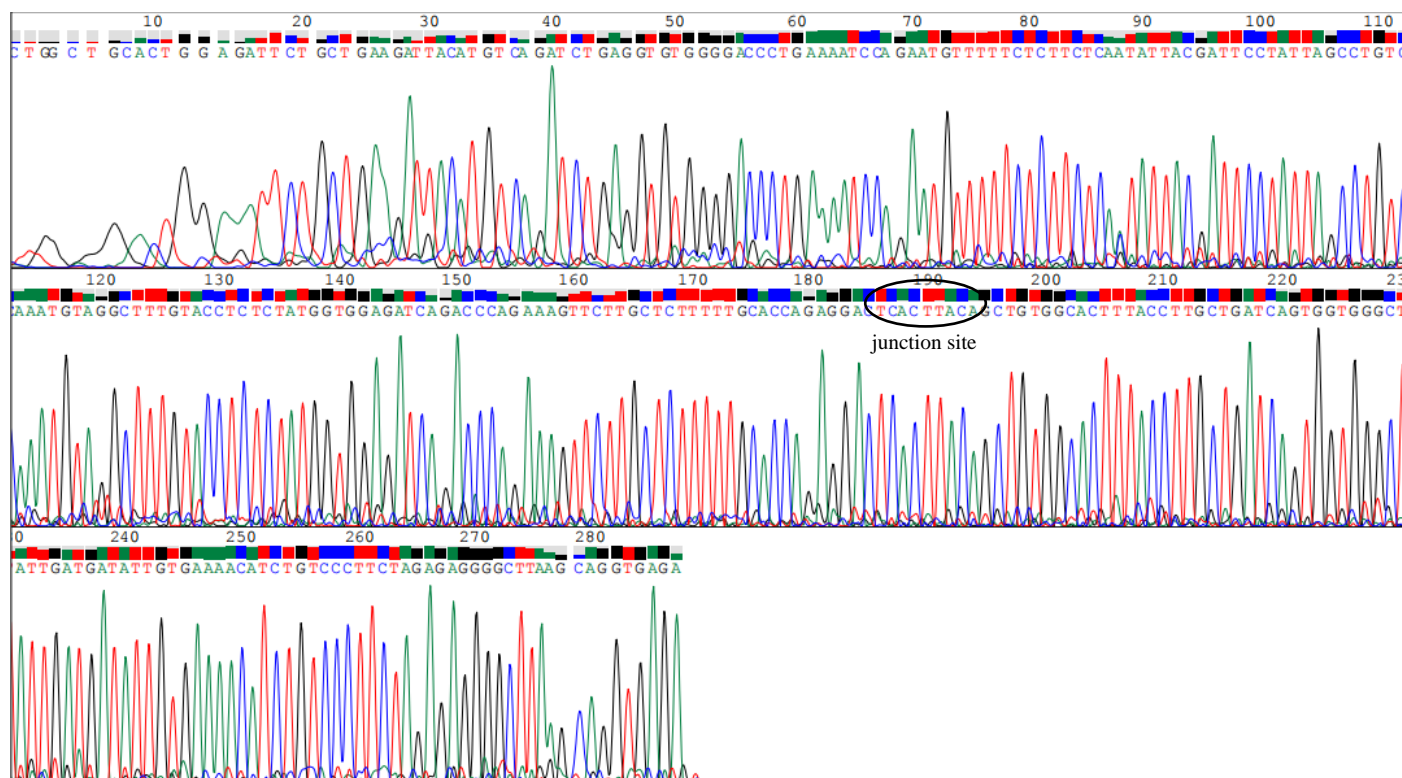

Sanger sequencing results of the RT-PCR product of oar\_circ\_0019258

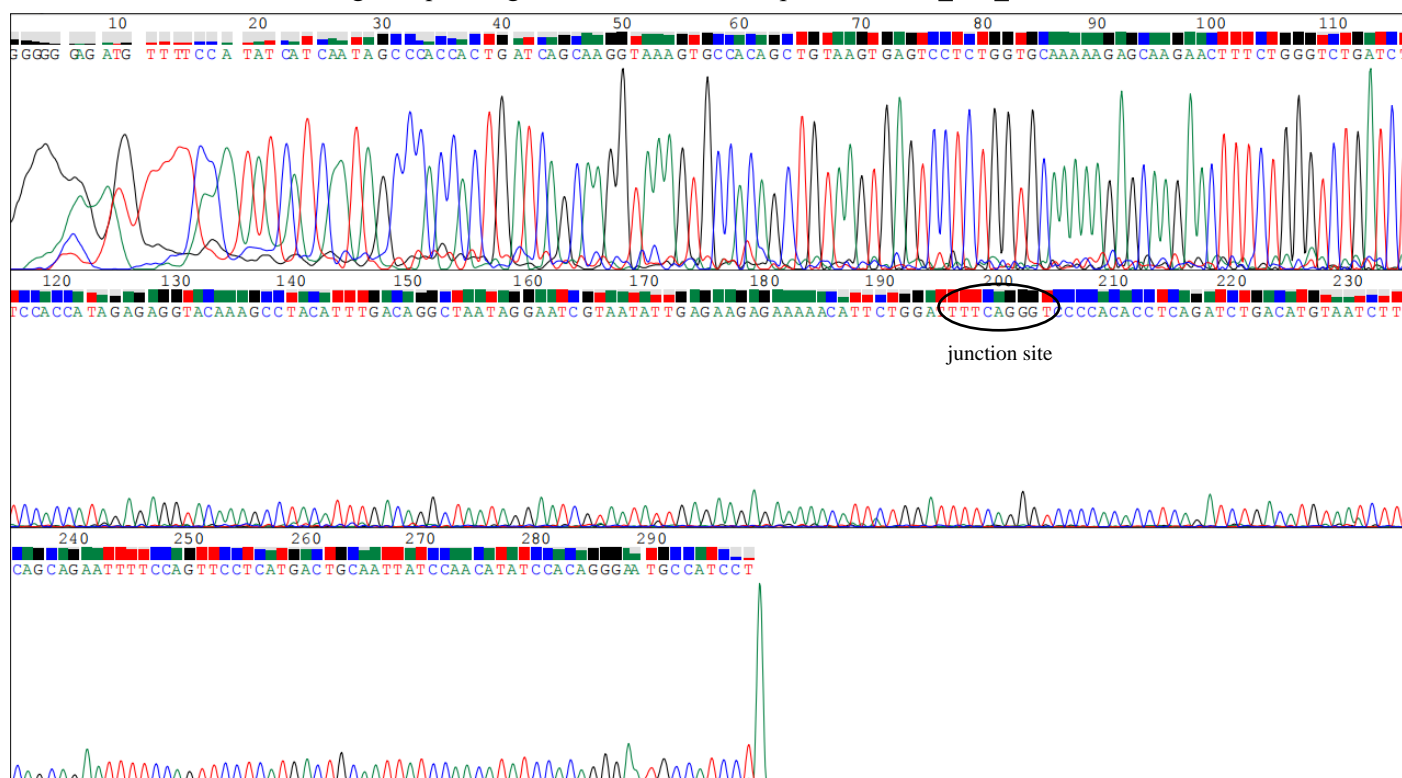

Sanger sequencing results of the RT-PCR product of oar\_circ\_0007731

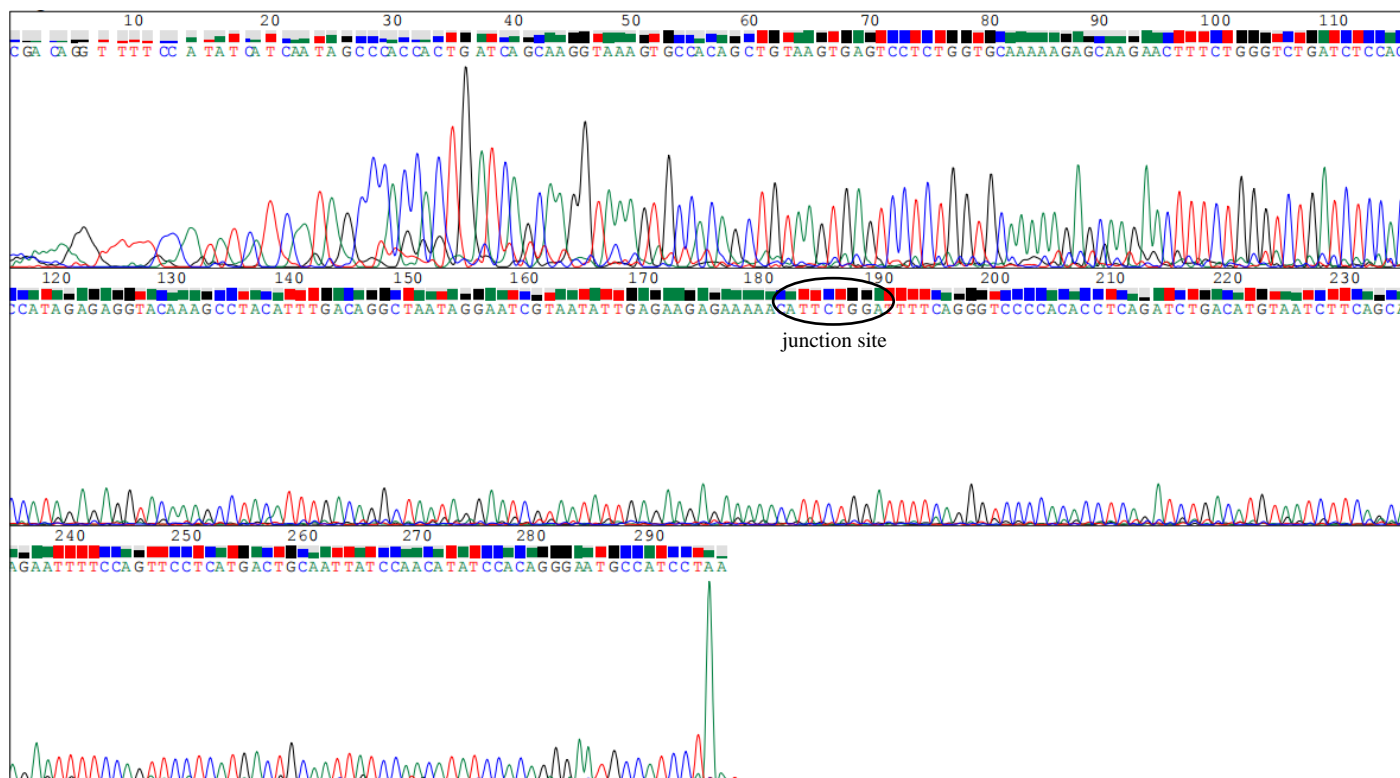

Supplement: s1 [file s1]
