# Supplementary material for: Transcriptomic Analysis Reveals Differentially Expressed Circular RNAs Associated with Fecundity in the Sheep Hypothalamus with Different FecB Genotypes
Source: Animals (Basel). 2024 Jan 7;14(2):198. doi: 10.3390/ani14020198 (PMC10812736; doi:10.3390/ani14020198)
Supplement: Supplementary file 1 [file animals-14-00198-s001.zip]

Archive with 7 entries (7 files):
- Figure S1 Sanger sequencing results of the RT-PCR products of circRNAs.pdf
- Table S1 Primer sequence and product size of circRNAs for qPCR and PCR.xlsx
- Table S2 Alignment of statistical results of reads.xls
- Table S3 All circRNAs identified in hypothalamus tissues.xls
- Table S4 DE circRNAs identified in hypothalamus tissues.xlsx
- Table S5 Enrichment analysis of DE circRNAs.xlsx
- Table S6 Bioinformatic analysis of circRNA-miRNA.xlsx
