# Supplementary material for: Transcriptomic Analysis Reveals Differentially Expressed Circular RNAs Associated with Fecundity in the Sheep Hypothalamus with Different FecB Genotypes
Source: Animals (Basel). 2024 Jan 7;14(2):198. doi: 10.3390/ani14020198 (PMC10812736; doi:10.3390/ani14020198)
Supplement: Supplementary file 1 [file animals-14-00198-s001.zip › Table S1 Primer sequence and product size of circRNAs for qPCR and PCR.xlsx]

## Sheet: qPCR primer
Table S1 Primer sequence and product size of circRNAs for RT-qPCR.
CirRNAs	Primer (5' -3')	Product size (bp)
oar_circ_0025922 F	ACCTGTCATTCCCGAAGTGC	120
oar_circ_0025922 R	GGAACATCACGGCGGTAGAA
oar_circ_0007733 F	GACCCTGCCTACCTGCCTAC	145
oar_circ_0007733 R	TCCATTTTCTTCTCTCTGACCTCTG
oar_circ_0000994 F	GCATACCCGTACCAGAAATCATCC	80
oar_circ_0000994 R	ACTGCCGGTTATCGACTGTAGAG
oar_circ_0001768 F	GGATGCCCAATTTGATGCTGATG	99
oar_circ_0001768 R	CTGTGGAGATGCGTCTGGAATAC
oar_circ_0030238 F	TTAGGCGTGGCTGTGAATGC	148
oar_circ_0030238 R	TTCCCCTTTCTGGTTGATTTTCC
oar_circ_0032202 F	ACGCATCCAGTGACCGAGTG	86
oar_circ_0032202 R	GGAGTGCTGTATGGTGGTGTTG
oar_circ_0007731 F	CCATGGATCGGGCTACTCTG	119
oar_circ_0007731 R	TGTAGGGGATCTTGAGCGTG
oar_circ_0019258 F	CTTTGGTTCCTGTTTCGAGC	129
oar_circ_0019258 F	ATACCGCTGCTTGGCTATGT
β-actin_F	CCAACCGTGAGAAGATGACC	97
β-actin_R	CCCGAGGCGTACAGGGACAG

## Sheet: PCR primer
Table S1 Primer sequence and product size of circRNAs for PCR.
CirRNAs	Primer (5' -3')	Product size (bp)
oar_circ_0025922 F	ACAAGATGCGGACAGGAAGG	315
oar_circ_0025922 R	GGAACATCACGGCGGTAGAA
oar_circ_0007733 F	CTGCCTACGCAACAAGATGT	400
oar_circ_0007733 R	CCCCTACATCGACCATTCTG
oar_circ_0000994 F	AATCACCCTTTGGGTGGAGC	351
oar_circ_0000994 R	ATCCCAAGGCGCAGAAGAAT
oar_circ_0001768 F	GACCTTCGGCTTTTTCATGGG	392
oar_circ_0001768 R	TGGCACACAGTCATGGTTGA
oar_circ_0030238 F	AGAAAACCCAAGCGTTCTGC	388
oar_circ_0030238 R	GGTGGTTTGCCCACAGGATA
oar_circ_0032202 F	AAGGAGTCCGAGGAGGGTGA	408
oar_circ_0032202 R	TGGCCAGAAGGATGCTTTCA
oar_circ_0007731 F	ACATGAGGCCCAAGGAACTG	401
oar_circ_0007731 R	GATGTTGTGCCCCACGTTTC
oar_circ_0019258 F	CTTTGGTTCCTGTTTCGAGC	395
oar_circ_0019258 R	ATACCGCTGCTTGGCTATGT
