# Supplementary material for: Transcriptomic Analysis Reveals Differentially Expressed Circular RNAs Associated with Fecundity in the Sheep Hypothalamus with Different FecB Genotypes
Source: Animals (Basel). 2024 Jan 7;14(2):198. doi: 10.3390/ani14020198 (PMC10812736; doi:10.3390/ani14020198)
Supplement: Supplementary file 1 [file animals-14-00198-s001.zip › Table S2 Alignment of statistical results of reads.xls]

Table S2 Alignment of statistical results of reads
#Library	BB_F_H1	BB_F_H2	BB_F_H3	BB_L_H1	BB_L_H2	BB_L_H3	WW_F_H1	WW_F_H2	WW_F_H3	WW_L_H1	WW_L_H2	WW_L_H3
Total Reads	101,315,928	115,876,944	125,730,702	102,109,974	104,363,734	108,389,442	123,255,224	124,067,616	124,053,164	121,362,322	129,352,084	123,408,360
Mapped Reads	101,301,127	115,851,928	125,708,160	102,096,073	104,344,236	108,363,803	123,231,836	124,045,993	124,021,972	121,342,004	129,328,880	123,387,967
Mapping Rate	0.9999	0.9998	0.9998	0.9999	0.9998	0.9998	0.9998	0.9998	0.9997	0.9998	0.9998	0.9998
UnMapped Reads	14,801	25,016	22,542	13,901	19,498	25,639	23,388	21,623	31,192	20,318	23,204	20,393
MultiMap Reads	17,579,291	25,974,979	26,681,308	18,074,426	20,873,828	20,531,470	23,458,850	21,776,678	30,386,510	23,746,585	25,246,458	21,636,718
MultiMap Rate	0.1735	0.2242	0.2122	0.177	0.2	0.1894	0.1903	0.1755	0.2449	0.1957	0.1952	0.1753
