# Supplementary material for: Transcriptomic Analysis Reveals Differentially Expressed Circular RNAs Associated with Fecundity in the Sheep Hypothalamus with Different FecB Genotypes
Source: Animals (Basel). 2024 Jan 7;14(2):198. doi: 10.3390/ani14020198 (PMC10812736; doi:10.3390/ani14020198)
Supplement: Supplementary file 1 [file animals-14-00198-s001.zip › Table S3 All circRNAs identified in hypothalamus tissues.xls]

Table S3 All circRNAs identified in hypothalamus tissues
#Sample	BB_F_H1	BB_F_H2	BB_F_H3	WW_F_H1	WW_F_H2	WW_F_H3	BB_L_H1	BB_L_H2	BB_L_H3	WW_L_H1	WW_L_H2	WW_L_H3
Raw Reads Number	103,984,530	117,808,682	128,105,206	125,148,098	128,608,622	126,552,048	104,521,412	107,122,786	112,741,858	126,544,446	133,402,028	127,569,900
Raw Bases Number	15,597,679,500	17,671,302,300	19,215,780,900	18,772,214,700	19,291,293,300	18,982,807,200	15,678,211,800	16,068,417,900	16,911,278,700	18,981,666,900	20,010,304,200	19,135,485,000
Clean Reads Number	101,315,928	115,876,944	125,730,702	123,255,224	124,067,616	124,053,164	102,109,974	104,363,734	108,389,442	121,362,322	129,352,084	123,408,360
Clean Reads Rate(%)	97.43	98.36	98.15	98.49	96.47	98.03	97.69	97.42	96.14	95.9	96.96	96.74
Clean Bases Number	15,197,389,200	17,381,541,600	18,859,605,300	18,488,283,600	18,610,142,400	18,607,974,600	15,316,496,100	15,654,560,100	16,258,416,300	18,204,348,300	19,402,812,600	18,511,254,000
Low-quality Reads Number	1,214,576	968,490	721,452	827,248	1,132,584	685,392	733,640	813,672	873,616	862,766	864,348	1,101,824
Low-quality Reads Rate(%)	1.17	0.82	0.56	0.66	0.88	0.54	0.7	0.76	0.78	0.68	0.65	0.86
Ns Reads Number	0	0	0	0	0	0	0	0	0	0	0	0
Ns Reads Rate(%)	0	0	0	0	0	0	0	0	0	0	0	0
Adapter Polluted Reads Number	1,407,836	817,980	1,506,964	997,586	3,380,824	1,672,306	1,630,250	1,746,722	3,358,638	4,192,468	3,046,858	2,753,150
Adapter Polluted Reads Rate(%)	1.35	0.69	1.18	0.8	2.63	1.32	1.56	1.63	2.98	3.31	2.28	2.16
Raw Q30 Bases Rate(%)	90.34	92.66	91.82	91.35	90.55	91.74	91.58	91.18	91.6	91.27	91.44	91.04
Clean Q30 Bases Rate(%)	90.89	93.08	92.11	91.69	91.23	92.04	91.91	91.55	91.94	91.57	91.85	91.46
rRNA Mapping Reads Number	46,190	145,268	146,088	68,040	27,598	141,186	47,548	198,658	120,162	126,890	138,738	306,566
rRNA Mapping Rate(%)	0.04	0.12	0.11	0.05	0.02	0.11	0.05	0.19	0.11	0.1	0.1	0.24
