# Supplementary material for: Transcriptomic Analysis Reveals Differentially Expressed Circular RNAs Associated with Fecundity in the Sheep Hypothalamus with Different FecB Genotypes
Source: Animals (Basel). 2024 Jan 7;14(2):198. doi: 10.3390/ani14020198 (PMC10812736; doi:10.3390/ani14020198)
Supplement: Supplementary file 1 [file animals-14-00198-s001.zip › Table S4 DE circRNAs identified in hypothalamus tissues.xlsx]

## Sheet: BB_F_H_BB_L_H
Gene	BB_F_H1_count	BB_F_H2_count	BB_F_H3_count	baseMean	BB_L_H1_count	BB_L_H2_count	BB_L_H3_count	Log2FoldChange	pval	padj	Up/Down	Significant	Location	Source_Gene	NR:Seq-id	NR:Score	NR:Evalue	NR:Description	NT:Seq-id	NT:Score	NT:Evalue	NT:Description	Uniprot:UniProtKB-AC	Uniprot:Score	Uniprot:Evalue	Uniprot:Description	COG:gene	COG:Score	COG:Eval	COG:num	Pfam:pfam_ID	Pfam:pfam_Name	Pfam:pfam_Description	GO:biological_process	GO:cellular_component	GO:molecular_function	KEGG:KO	KEGG:Description
oar_circ_0000001	0	0	2	0.244763	0	0	0	1.16974	0.431077	NA	up	no	NC_019458.2:100118891..100119329:+	gene1199	gi|426216582|ref|XP_004002540.1|	1399	0	PREDICTED: proteasome subunit beta type-4 [Ovis aries]	gi|556750601|ref|XM_005970654.1|	884	0	PREDICTED: Pantholops hodgsonii proteasome (prosome, macropain) subunit, beta type, 4 (PSMB4), mRNA	Q3T108	538	0	Proteasome subunit beta type-4	.	.	.	.	pfam00227	Proteasome	Proteasome subunit. The proteasome is a multisubunit structure that degrades proteins. Protein degradation is an essential component of regulation because proteins can become misfolded, damaged, or unnecessary. Proteasomes and their homologues vary greatly in complexity: from HslV (heat shock locus v), which is encoded by 1 gene in bacteria, to the eukaryotic 20S proteasome, which is encoded by m…	GO:0002862|negative regulation of inflammatory response to antigenic stimulus;GO:0051603|proteolysis involved in cellular protein catabolic process;	GO:0005737|cytoplasm;GO:0070062|extracellular exosome;GO:0005634|nucleus;GO:0005839|proteasome core complex;	GO:0001530|lipopolysaccharide binding;GO:0004298|threonine-type endopeptidase activity;	K02736	PSMB4; 20S proteasome subunit beta 7 [EC:3.4.25.1]
oar_circ_0000004	0	8	11	7.53432	6	9	14	-0.948001	0.323367	0.999963	down	no	NC_019458.2:100279495..100287863:+	gene1203	gi|426216598|ref|XP_004002548.1|	1905	0	PREDICTED: tuftelin isoform X1 [Ovis aries]	gi|548457642|ref|XM_005677592.1|	2574	0	PREDICTED: Capra hircus tuftelin 1 (TUFT1), transcript variant X1, mRNA	P27628	639	0	Tuftelin	.	.	.	.	pfam07888	CALCOCO1	Calcium binding and coiled-coil domain (CALCOCO1) like. Proteins found in this family are similar to the coiled-coil transcriptional coactivator protein coexpressed by Mus musculus (CoCoA/CALCOCO1). This protein binds to a highly conserved N-terminal domain of p160 coactivators, such as GRIP1, and thus enhances transcriptional activation by a number of nuclear receptors. CALCOCO1 has a central co…	GO:0031214|biomineral tissue development;GO:0035556|intracellular signal transduction;	GO:0005576|extracellular region;GO:0005622|intracellular;	GO:0042802|identical protein binding;	.	.
oar_circ_0000005	0	0	2	1.83424	4	2	3	-1.80504	0.212932	NA	down	no	NC_019458.2:100282624..100287863:+	gene1203	gi|426216598|ref|XP_004002548.1|	1905	0	PREDICTED: tuftelin isoform X1 [Ovis aries]	gi|548457642|ref|XM_005677592.1|	2574	0	PREDICTED: Capra hircus tuftelin 1 (TUFT1), transcript variant X1, mRNA	P27628	639	0	Tuftelin	.	.	.	.	pfam07888	CALCOCO1	Calcium binding and coiled-coil domain (CALCOCO1) like. Proteins found in this family are similar to the coiled-coil transcriptional coactivator protein coexpressed by Mus musculus (CoCoA/CALCOCO1). This protein binds to a highly conserved N-terminal domain of p160 coactivators, such as GRIP1, and thus enhances transcriptional activation by a number of nuclear receptors. CALCOCO1 has a central co…	GO:0031214|biomineral tissue development;GO:0035556|intracellular signal transduction;	GO:0005576|extracellular region;GO:0005622|intracellular;	GO:0042802|identical protein binding;	.	.
oar_circ_0000006	0	0	0	0.353574	0	0	2	-1.33301	0.37664	NA	down	no	NC_019458.2:100351424..100365310:+	gene1207	gi|589964638|ref|XP_006994859.1|	2848	0	PREDICTED: sorting nexin-27 isoform X1 [Peromyscus maniculatus bairdii]	gi|594062255|ref|XM_006055126.1|	3327	0	PREDICTED: Bubalus bubalis sorting nexin family member 27 (SNX27), transcript variant X1, mRNA	A5PKA5	1073	0	Sorting nexin-27	.	.	.	.	pfam00787	PX	PX domain. PX domains bind to phosphoinositides.	GO:0016197|endosomal transport;GO:0008333|endosome to lysosome transport;GO:0006886|intracellular protein transport;GO:1990126|retrograde transport, endosome to plasma membrane;GO:0007165|signal transduction;	GO:0005829|cytosol;GO:0005769|early endosome;GO:0031901|early endosome membrane;GO:0001772|immunological synapse;GO:0005654|nucleoplasm;GO:0030904|retromer complex;GO:0071203|WASH complex;	GO:0035091|phosphatidylinositol binding;GO:0032266|phosphatidylinositol-3-phosphate binding;	K17936	SNX27; sorting nexin-27
oar_circ_0000007	0	7	3	1.97454	4	0	0	0.612221	0.67935	0.999963	up	no	NC_019458.2:100351424..100373026:+	gene1207	gi|589964638|ref|XP_006994859.1|	2848	0	PREDICTED: sorting nexin-27 isoform X1 [Peromyscus maniculatus bairdii]	gi|594062255|ref|XM_006055126.1|	3327	0	PREDICTED: Bubalus bubalis sorting nexin family member 27 (SNX27), transcript variant X1, mRNA	A5PKA5	1073	0	Sorting nexin-27	.	.	.	.	pfam00787	PX	PX domain. PX domains bind to phosphoinositides.	GO:0016197|endosomal transport;GO:0008333|endosome to lysosome transport;GO:0006886|intracellular protein transport;GO:1990126|retrograde transport, endosome to plasma membrane;GO:0007165|signal transduction;	GO:0005829|cytosol;GO:0005769|early endosome;GO:0031901|early endosome membrane;GO:0001772|immunological synapse;GO:0005654|nucleoplasm;GO:0030904|retromer complex;GO:0071203|WASH complex;	GO:0035091|phosphatidylinositol binding;GO:0032266|phosphatidylinositol-3-phosphate binding;	K17936	SNX27; sorting nexin-27
oar_circ_0000008	0	0	2	1.11674	5	0	0	-0.938301	0.554685	NA	down	no	NC_019458.2:100351424..100375198:+	gene1207	gi|589964638|ref|XP_006994859.1|	2848	0	PREDICTED: sorting nexin-27 isoform X1 [Peromyscus maniculatus bairdii]	gi|594062255|ref|XM_006055126.1|	3327	0	PREDICTED: Bubalus bubalis sorting nexin family member 27 (SNX27), transcript variant X1, mRNA	A5PKA5	1073	0	Sorting nexin-27	.	.	.	.	pfam00787	PX	PX domain. PX domains bind to phosphoinositides.	GO:0016197|endosomal transport;GO:0008333|endosome to lysosome transport;GO:0006886|intracellular protein transport;GO:1990126|retrograde transport, endosome to plasma membrane;GO:0007165|signal transduction;	GO:0005829|cytosol;GO:0005769|early endosome;GO:0031901|early endosome membrane;GO:0001772|immunological synapse;GO:0005654|nucleoplasm;GO:0030904|retromer complex;GO:0071203|WASH complex;	GO:0035091|phosphatidylinositol binding;GO:0032266|phosphatidylinositol-3-phosphate binding;	K17936	SNX27; sorting nexin-27
oar_circ_0000009	2	6	14	5.04577	3	3	6	0.426316	0.679172	0.999963	up	no	NC_019458.2:100351424..100378242:+	gene1207	gi|589964638|ref|XP_006994859.1|	2848	0	PREDICTED: sorting nexin-27 isoform X1 [Peromyscus maniculatus bairdii]	gi|594062255|ref|XM_006055126.1|	3327	0	PREDICTED: Bubalus bubalis sorting nexin family member 27 (SNX27), transcript variant X1, mRNA	A5PKA5	1073	0	Sorting nexin-27	.	.	.	.	pfam00787	PX	PX domain. PX domains bind to phosphoinositides.	GO:0016197|endosomal transport;GO:0008333|endosome to lysosome transport;GO:0006886|intracellular protein transport;GO:1990126|retrograde transport, endosome to plasma membrane;GO:0007165|signal transduction;	GO:0005829|cytosol;GO:0005769|early endosome;GO:0031901|early endosome membrane;GO:0001772|immunological synapse;GO:0005654|nucleoplasm;GO:0030904|retromer complex;GO:0071203|WASH complex;	GO:0035091|phosphatidylinositol binding;GO:0032266|phosphatidylinositol-3-phosphate binding;	K17936	SNX27; sorting nexin-27
oar_circ_0000010	17	30	36	26.0728	33	20	27	-0.235081	0.654683	0.999963	down	no	NC_019458.2:100351424..100385554:+	gene1207	gi|589964638|ref|XP_006994859.1|	2848	0	PREDICTED: sorting nexin-27 isoform X1 [Peromyscus maniculatus bairdii]	gi|594062255|ref|XM_006055126.1|	3327	0	PREDICTED: Bubalus bubalis sorting nexin family member 27 (SNX27), transcript variant X1, mRNA	A5PKA5	1073	0	Sorting nexin-27	.	.	.	.	pfam00787	PX	PX domain. PX domains bind to phosphoinositides.	GO:0016197|endosomal transport;GO:0008333|endosome to lysosome transport;GO:0006886|intracellular protein transport;GO:1990126|retrograde transport, endosome to plasma membrane;GO:0007165|signal transduction;	GO:0005829|cytosol;GO:0005769|early endosome;GO:0031901|early endosome membrane;GO:0001772|immunological synapse;GO:0005654|nucleoplasm;GO:0030904|retromer complex;GO:0071203|WASH complex;	GO:0035091|phosphatidylinositol binding;GO:0032266|phosphatidylinositol-3-phosphate binding;	K17936	SNX27; sorting nexin-27
oar_circ_0000011	12	27	15	17.1344	19	21	12	-0.214449	0.736279	0.999963	down	no	NC_019458.2:100351424..100395804:+	gene1207	gi|589964638|ref|XP_006994859.1|	2848	0	PREDICTED: sorting nexin-27 isoform X1 [Peromyscus maniculatus bairdii]	gi|594062255|ref|XM_006055126.1|	3327	0	PREDICTED: Bubalus bubalis sorting nexin family member 27 (SNX27), transcript variant X1, mRNA	A5PKA5	1073	0	Sorting nexin-27	.	.	.	.	pfam00787	PX	PX domain. PX domains bind to phosphoinositides.	GO:0016197|endosomal transport;GO:0008333|endosome to lysosome transport;GO:0006886|intracellular protein transport;GO:1990126|retrograde transport, endosome to plasma membrane;GO:0007165|signal transduction;	GO:0005829|cytosol;GO:0005769|early endosome;GO:0031901|early endosome membrane;GO:0001772|immunological synapse;GO:0005654|nucleoplasm;GO:0030904|retromer complex;GO:0071203|WASH complex;	GO:0035091|phosphatidylinositol binding;GO:0032266|phosphatidylinositol-3-phosphate binding;	K17936	SNX27; sorting nexin-27
oar_circ_0000012	0	3	9	2.02172	0	0	3	1.03898	0.481804	0.999963	up	no	NC_019458.2:100351424..100403235:+	gene1207	gi|589964638|ref|XP_006994859.1|	2848	0	PREDICTED: sorting nexin-27 isoform X1 [Peromyscus maniculatus bairdii]	gi|594062255|ref|XM_006055126.1|	3327	0	PREDICTED: Bubalus bubalis sorting nexin family member 27 (SNX27), transcript variant X1, mRNA	A5PKA5	1073	0	Sorting nexin-27	.	.	.	.	pfam00787	PX	PX domain. PX domains bind to phosphoinositides.	GO:0016197|endosomal transport;GO:0008333|endosome to lysosome transport;GO:0006886|intracellular protein transport;GO:1990126|retrograde transport, endosome to plasma membrane;GO:0007165|signal transduction;	GO:0005829|cytosol;GO:0005769|early endosome;GO:0031901|early endosome membrane;GO:0001772|immunological synapse;GO:0005654|nucleoplasm;GO:0030904|retromer complex;GO:0071203|WASH complex;	GO:0035091|phosphatidylinositol binding;GO:0032266|phosphatidylinositol-3-phosphate binding;	K17936	SNX27; sorting nexin-27
oar_circ_0000013	0	0	3	0.367144	0	0	0	1.3119	0.385146	NA	up	no	NC_019458.2:100371208..100375198:+	gene1207	gi|589964638|ref|XP_006994859.1|	2848	0	PREDICTED: sorting nexin-27 isoform X1 [Peromyscus maniculatus bairdii]	gi|594062255|ref|XM_006055126.1|	3327	0	PREDICTED: Bubalus bubalis sorting nexin family member 27 (SNX27), transcript variant X1, mRNA	A5PKA5	1073	0	Sorting nexin-27	.	.	.	.	pfam00787	PX	PX domain. PX domains bind to phosphoinositides.	GO:0016197|endosomal transport;GO:0008333|endosome to lysosome transport;GO:0006886|intracellular protein transport;GO:1990126|retrograde transport, endosome to plasma membrane;GO:0007165|signal transduction;	GO:0005829|cytosol;GO:0005769|early endosome;GO:0031901|early endosome membrane;GO:0001772|immunological synapse;GO:0005654|nucleoplasm;GO:0030904|retromer complex;GO:0071203|WASH complex;	GO:0035091|phosphatidylinositol binding;GO:0032266|phosphatidylinositol-3-phosphate binding;	K17936	SNX27; sorting nexin-27
oar_circ_0000014	3	9	12	6.65437	6	8	5	-0.0183657	0.983861	0.999963	down	no	NC_019458.2:100371208..100378242:+	gene1207	gi|589964638|ref|XP_006994859.1|	2848	0	PREDICTED: sorting nexin-27 isoform X1 [Peromyscus maniculatus bairdii]	gi|594062255|ref|XM_006055126.1|	3327	0	PREDICTED: Bubalus bubalis sorting nexin family member 27 (SNX27), transcript variant X1, mRNA	A5PKA5	1073	0	Sorting nexin-27	.	.	.	.	pfam00787	PX	PX domain. PX domains bind to phosphoinositides.	GO:0016197|endosomal transport;GO:0008333|endosome to lysosome transport;GO:0006886|intracellular protein transport;GO:1990126|retrograde transport, endosome to plasma membrane;GO:0007165|signal transduction;	GO:0005829|cytosol;GO:0005769|early endosome;GO:0031901|early endosome membrane;GO:0001772|immunological synapse;GO:0005654|nucleoplasm;GO:0030904|retromer complex;GO:0071203|WASH complex;	GO:0035091|phosphatidylinositol binding;GO:0032266|phosphatidylinositol-3-phosphate binding;	K17936	SNX27; sorting nexin-27
oar_circ_0000015	19	11	16	14.8753	15	12	15	-0.0271301	0.968359	0.999963	down	no	NC_019458.2:100371208..100385554:+	gene1207	gi|589964638|ref|XP_006994859.1|	2848	0	PREDICTED: sorting nexin-27 isoform X1 [Peromyscus maniculatus bairdii]	gi|594062255|ref|XM_006055126.1|	3327	0	PREDICTED: Bubalus bubalis sorting nexin family member 27 (SNX27), transcript variant X1, mRNA	A5PKA5	1073	0	Sorting nexin-27	.	.	.	.	pfam00787	PX	PX domain. PX domains bind to phosphoinositides.	GO:0016197|endosomal transport;GO:0008333|endosome to lysosome transport;GO:0006886|intracellular protein transport;GO:1990126|retrograde transport, endosome to plasma membrane;GO:0007165|signal transduction;	GO:0005829|cytosol;GO:0005769|early endosome;GO:0031901|early endosome membrane;GO:0001772|immunological synapse;GO:0005654|nucleoplasm;GO:0030904|retromer complex;GO:0071203|WASH complex;	GO:0035091|phosphatidylinositol binding;GO:0032266|phosphatidylinositol-3-phosphate binding;	K17936	SNX27; sorting nexin-27
oar_circ_0000016	2	7	3	4.37506	0	5	10	-0.537414	0.643926	0.999963	down	no	NC_019458.2:100371208..100395804:+	gene1207	gi|589964638|ref|XP_006994859.1|	2848	0	PREDICTED: sorting nexin-27 isoform X1 [Peromyscus maniculatus bairdii]	gi|594062255|ref|XM_006055126.1|	3327	0	PREDICTED: Bubalus bubalis sorting nexin family member 27 (SNX27), transcript variant X1, mRNA	A5PKA5	1073	0	Sorting nexin-27	.	.	.	.	pfam00787	PX	PX domain. PX domains bind to phosphoinositides.	GO:0016197|endosomal transport;GO:0008333|endosome to lysosome transport;GO:0006886|intracellular protein transport;GO:1990126|retrograde transport, endosome to plasma membrane;GO:0007165|signal transduction;	GO:0005829|cytosol;GO:0005769|early endosome;GO:0031901|early endosome membrane;GO:0001772|immunological synapse;GO:0005654|nucleoplasm;GO:0030904|retromer complex;GO:0071203|WASH complex;	GO:0035091|phosphatidylinositol binding;GO:0032266|phosphatidylinositol-3-phosphate binding;	K17936	SNX27; sorting nexin-27
oar_circ_0000017	0	3	6	2.35773	5	2	0	-0.0685643	0.960519	0.999963	down	no	NC_019458.2:100375094..100385554:+	gene1207	gi|589964638|ref|XP_006994859.1|	2848	0	PREDICTED: sorting nexin-27 isoform X1 [Peromyscus maniculatus bairdii]	gi|594062255|ref|XM_006055126.1|	3327	0	PREDICTED: Bubalus bubalis sorting nexin family member 27 (SNX27), transcript variant X1, mRNA	A5PKA5	1073	0	Sorting nexin-27	.	.	.	.	pfam00787	PX	PX domain. PX domains bind to phosphoinositides.	GO:0016197|endosomal transport;GO:0008333|endosome to lysosome transport;GO:0006886|intracellular protein transport;GO:1990126|retrograde transport, endosome to plasma membrane;GO:0007165|signal transduction;	GO:0005829|cytosol;GO:0005769|early endosome;GO:0031901|early endosome membrane;GO:0001772|immunological synapse;GO:0005654|nucleoplasm;GO:0030904|retromer complex;GO:0071203|WASH complex;	GO:0035091|phosphatidylinositol binding;GO:0032266|phosphatidylinositol-3-phosphate binding;	K17936	SNX27; sorting nexin-27
oar_circ_0000018	3	6	0	1.77298	0	0	2	1.29798	0.389222	NA	up	no	NC_019458.2:100395715..100403235:+	gene1207	gi|589964638|ref|XP_006994859.1|	2848	0	PREDICTED: sorting nexin-27 isoform X1 [Peromyscus maniculatus bairdii]	gi|594062255|ref|XM_006055126.1|	3327	0	PREDICTED: Bubalus bubalis sorting nexin family member 27 (SNX27), transcript variant X1, mRNA	A5PKA5	1073	0	Sorting nexin-27	.	.	.	.	pfam00787	PX	PX domain. PX domains bind to phosphoinositides.	GO:0016197|endosomal transport;GO:0008333|endosome to lysosome transport;GO:0006886|intracellular protein transport;GO:1990126|retrograde transport, endosome to plasma membrane;GO:0007165|signal transduction;	GO:0005829|cytosol;GO:0005769|early endosome;GO:0031901|early endosome membrane;GO:0001772|immunological synapse;GO:0005654|nucleoplasm;GO:0030904|retromer complex;GO:0071203|WASH complex;	GO:0035091|phosphatidylinositol binding;GO:0032266|phosphatidylinositol-3-phosphate binding;	K17936	SNX27; sorting nexin-27
oar_circ_0000020	6	8	12	6.61527	7	4	5	0.383548	0.670933	0.999963	up	no	NC_019458.2:10041174..10083680:+	gene143	gi|802976902|ref|XP_011950896.1|	7831	0	PREDICTED: zinc finger MYM-type protein 4 isoform X3 [Ovis aries]	gi|556733296|ref|XM_005962236.1|	6776	0	PREDICTED: Pantholops hodgsonii zinc finger, MYM-type 4 (ZMYM4), mRNA	Q5VZL5	91.3	1e-16	Zinc finger MYM-type protein 4	.	.	.	.	pfam12012	DUF3504	Domain of unknown function (DUF3504). This presumed domain is functionally uncharacterized. This domain is found in eukaryotes. This domain is typically between 156 to 173 amino acids in length.	GO:0007010|cytoskeleton organization;GO:0007275|multicellular organismal development;GO:0022604|regulation of cell morphogenesis;	GO:0005737|cytoplasm;GO:0005654|nucleoplasm;	GO:0003677|DNA binding;GO:0000981|RNA polymerase II transcription factor activity, sequence-specific DNA binding;GO:0008270|zinc ion binding;	.	.
oar_circ_0000022	0	0	0	0.353574	0	0	2	-1.33301	0.37664	NA	down	no	NC_019458.2:10080901..10083158:+	gene143	gi|802976902|ref|XP_011950896.1|	7831	0	PREDICTED: zinc finger MYM-type protein 4 isoform X3 [Ovis aries]	gi|556733296|ref|XM_005962236.1|	6776	0	PREDICTED: Pantholops hodgsonii zinc finger, MYM-type 4 (ZMYM4), mRNA	Q5VZL5	91.3	1e-16	Zinc finger MYM-type protein 4	.	.	.	.	pfam12012	DUF3504	Domain of unknown function (DUF3504). This presumed domain is functionally uncharacterized. This domain is found in eukaryotes. This domain is typically between 156 to 173 amino acids in length.	GO:0007010|cytoskeleton organization;GO:0007275|multicellular organismal development;GO:0022604|regulation of cell morphogenesis;	GO:0005737|cytoplasm;GO:0005654|nucleoplasm;	GO:0003677|DNA binding;GO:0000981|RNA polymerase II transcription factor activity, sequence-specific DNA binding;GO:0008270|zinc ion binding;	.	.
oar_circ_0000023	344	413	436	349.029	353	301	298	0.0931301	0.720979	0.999963	up	no	NC_019458.2:10080901..10083680:+	gene143	gi|802976902|ref|XP_011950896.1|	7831	0	PREDICTED: zinc finger MYM-type protein 4 isoform X3 [Ovis aries]	gi|556733296|ref|XM_005962236.1|	6776	0	PREDICTED: Pantholops hodgsonii zinc finger, MYM-type 4 (ZMYM4), mRNA	Q5VZL5	91.3	1e-16	Zinc finger MYM-type protein 4	.	.	.	.	pfam12012	DUF3504	Domain of unknown function (DUF3504). This presumed domain is functionally uncharacterized. This domain is found in eukaryotes. This domain is typically between 156 to 173 amino acids in length.	GO:0007010|cytoskeleton organization;GO:0007275|multicellular organismal development;GO:0022604|regulation of cell morphogenesis;	GO:0005737|cytoplasm;GO:0005654|nucleoplasm;	GO:0003677|DNA binding;GO:0000981|RNA polymerase II transcription factor activity, sequence-specific DNA binding;GO:0008270|zinc ion binding;	.	.
oar_circ_0000024	2	0	0	0.426371	0	0	0	1.32953	0.379624	NA	up	no	NC_019458.2:10080901..10085533:+	Null	.	.	.	.	.	.	.	.	.	.	.	.	.	.	.	.	.	.	.	.	.	.	.	.
oar_circ_0000024	2	0	0	0.426371	0	0	0	1.32953	0.379624	NA	up	no	NC_019458.2:10080901..10085533:+	gene143	gi|802976902|ref|XP_011950896.1|	7831	0	PREDICTED: zinc finger MYM-type protein 4 isoform X3 [Ovis aries]	gi|556733296|ref|XM_005962236.1|	6776	0	PREDICTED: Pantholops hodgsonii zinc finger, MYM-type 4 (ZMYM4), mRNA	Q5VZL5	91.3	1e-16	Zinc finger MYM-type protein 4	.	.	.	.	pfam12012	DUF3504	Domain of unknown function (DUF3504). This presumed domain is functionally uncharacterized. This domain is found in eukaryotes. This domain is typically between 156 to 173 amino acids in length.	GO:0007010|cytoskeleton organization;GO:0007275|multicellular organismal development;GO:0022604|regulation of cell morphogenesis;	GO:0005737|cytoplasm;GO:0005654|nucleoplasm;	GO:0003677|DNA binding;GO:0000981|RNA polymerase II transcription factor activity, sequence-specific DNA binding;GO:0008270|zinc ion binding;	.	.
oar_circ_0000025	7	17	9	8.54051	8	11	2	0.335062	0.700176	0.999963	up	no	NC_019458.2:10080901..10095646:+	gene143	gi|802976902|ref|XP_011950896.1|	7831	0	PREDICTED: zinc finger MYM-type protein 4 isoform X3 [Ovis aries]	gi|556733296|ref|XM_005962236.1|	6776	0	PREDICTED: Pantholops hodgsonii zinc finger, MYM-type 4 (ZMYM4), mRNA	Q5VZL5	91.3	1e-16	Zinc finger MYM-type protein 4	.	.	.	.	pfam12012	DUF3504	Domain of unknown function (DUF3504). This presumed domain is functionally uncharacterized. This domain is found in eukaryotes. This domain is typically between 156 to 173 amino acids in length.	GO:0007010|cytoskeleton organization;GO:0007275|multicellular organismal development;GO:0022604|regulation of cell morphogenesis;	GO:0005737|cytoplasm;GO:0005654|nucleoplasm;	GO:0003677|DNA binding;GO:0000981|RNA polymerase II transcription factor activity, sequence-specific DNA binding;GO:0008270|zinc ion binding;	.	.
oar_circ_0000027	2	0	3	0.793514	0	0	0	2.00716	0.205823	NA	up	no	NC_019458.2:10080901..10110941:+	gene143	gi|802976902|ref|XP_011950896.1|	7831	0	PREDICTED: zinc finger MYM-type protein 4 isoform X3 [Ovis aries]	gi|556733296|ref|XM_005962236.1|	6776	0	PREDICTED: Pantholops hodgsonii zinc finger, MYM-type 4 (ZMYM4), mRNA	Q5VZL5	91.3	1e-16	Zinc finger MYM-type protein 4	.	.	.	.	pfam12012	DUF3504	Domain of unknown function (DUF3504). This presumed domain is functionally uncharacterized. This domain is found in eukaryotes. This domain is typically between 156 to 173 amino acids in length.	GO:0007010|cytoskeleton organization;GO:0007275|multicellular organismal development;GO:0022604|regulation of cell morphogenesis;	GO:0005737|cytoplasm;GO:0005654|nucleoplasm;	GO:0003677|DNA binding;GO:0000981|RNA polymerase II transcription factor activity, sequence-specific DNA binding;GO:0008270|zinc ion binding;	.	.
oar_circ_0000028	2	3	0	1.88897	0	3	3	-0.300908	0.834888	0.999963	down	no	NC_019458.2:10080901..10119843:+	gene143	gi|802976902|ref|XP_011950896.1|	7831	0	PREDICTED: zinc finger MYM-type protein 4 isoform X3 [Ovis aries]	gi|556733296|ref|XM_005962236.1|	6776	0	PREDICTED: Pantholops hodgsonii zinc finger, MYM-type 4 (ZMYM4), mRNA	Q5VZL5	91.3	1e-16	Zinc finger MYM-type protein 4	.	.	.	.	pfam12012	DUF3504	Domain of unknown function (DUF3504). This presumed domain is functionally uncharacterized. This domain is found in eukaryotes. This domain is typically between 156 to 173 amino acids in length.	GO:0007010|cytoskeleton organization;GO:0007275|multicellular organismal development;GO:0022604|regulation of cell morphogenesis;	GO:0005737|cytoplasm;GO:0005654|nucleoplasm;	GO:0003677|DNA binding;GO:0000981|RNA polymerase II transcription factor activity, sequence-specific DNA binding;GO:0008270|zinc ion binding;	.	.
oar_circ_0000029	3	0	0	0.639556	0	0	0	1.53345	0.320032	NA	up	no	NC_019458.2:10080901..10130337:+	gene143	gi|802976902|ref|XP_011950896.1|	7831	0	PREDICTED: zinc finger MYM-type protein 4 isoform X3 [Ovis aries]	gi|556733296|ref|XM_005962236.1|	6776	0	PREDICTED: Pantholops hodgsonii zinc finger, MYM-type 4 (ZMYM4), mRNA	Q5VZL5	91.3	1e-16	Zinc finger MYM-type protein 4	.	.	.	.	pfam12012	DUF3504	Domain of unknown function (DUF3504). This presumed domain is functionally uncharacterized. This domain is found in eukaryotes. This domain is typically between 156 to 173 amino acids in length.	GO:0007010|cytoskeleton organization;GO:0007275|multicellular organismal development;GO:0022604|regulation of cell morphogenesis;	GO:0005737|cytoplasm;GO:0005654|nucleoplasm;	GO:0003677|DNA binding;GO:0000981|RNA polymerase II transcription factor activity, sequence-specific DNA binding;GO:0008270|zinc ion binding;	.	.
oar_circ_0000030	0	0	6	1.81095	0	4	2	-0.335418	0.823264	NA	down	no	NC_019458.2:10080901..10140337:+	gene143	gi|802976902|ref|XP_011950896.1|	7831	0	PREDICTED: zinc finger MYM-type protein 4 isoform X3 [Ovis aries]	gi|556733296|ref|XM_005962236.1|	6776	0	PREDICTED: Pantholops hodgsonii zinc finger, MYM-type 4 (ZMYM4), mRNA	Q5VZL5	91.3	1e-16	Zinc finger MYM-type protein 4	.	.	.	.	pfam12012	DUF3504	Domain of unknown function (DUF3504). This presumed domain is functionally uncharacterized. This domain is found in eukaryotes. This domain is typically between 156 to 173 amino acids in length.	GO:0007010|cytoskeleton organization;GO:0007275|multicellular organismal development;GO:0022604|regulation of cell morphogenesis;	GO:0005737|cytoplasm;GO:0005654|nucleoplasm;	GO:0003677|DNA binding;GO:0000981|RNA polymerase II transcription factor activity, sequence-specific DNA binding;GO:0008270|zinc ion binding;	.	.
oar_circ_0000031	0	0	0	0.348789	2	0	0	-1.32922	0.377798	NA	down	no	NC_019458.2:10080901..10153836:+	gene143	gi|802976902|ref|XP_011950896.1|	7831	0	PREDICTED: zinc finger MYM-type protein 4 isoform X3 [Ovis aries]	gi|556733296|ref|XM_005962236.1|	6776	0	PREDICTED: Pantholops hodgsonii zinc finger, MYM-type 4 (ZMYM4), mRNA	Q5VZL5	91.3	1e-16	Zinc finger MYM-type protein 4	.	.	.	.	pfam12012	DUF3504	Domain of unknown function (DUF3504). This presumed domain is functionally uncharacterized. This domain is found in eukaryotes. This domain is typically between 156 to 173 amino acids in length.	GO:0007010|cytoskeleton organization;GO:0007275|multicellular organismal development;GO:0022604|regulation of cell morphogenesis;	GO:0005737|cytoplasm;GO:0005654|nucleoplasm;	GO:0003677|DNA binding;GO:0000981|RNA polymerase II transcription factor activity, sequence-specific DNA binding;GO:0008270|zinc ion binding;	.	.
oar_circ_0000032	0	0	0	0.523184	3	0	0	-1.46707	0.336722	NA	down	no	NC_019458.2:10090504..10110941:+	gene143	gi|802976902|ref|XP_011950896.1|	7831	0	PREDICTED: zinc finger MYM-type protein 4 isoform X3 [Ovis aries]	gi|556733296|ref|XM_005962236.1|	6776	0	PREDICTED: Pantholops hodgsonii zinc finger, MYM-type 4 (ZMYM4), mRNA	Q5VZL5	91.3	1e-16	Zinc finger MYM-type protein 4	.	.	.	.	pfam12012	DUF3504	Domain of unknown function (DUF3504). This presumed domain is functionally uncharacterized. This domain is found in eukaryotes. This domain is typically between 156 to 173 amino acids in length.	GO:0007010|cytoskeleton organization;GO:0007275|multicellular organismal development;GO:0022604|regulation of cell morphogenesis;	GO:0005737|cytoplasm;GO:0005654|nucleoplasm;	GO:0003677|DNA binding;GO:0000981|RNA polymerase II transcription factor activity, sequence-specific DNA binding;GO:0008270|zinc ion binding;	.	.
oar_circ_0000033	10	6	4	6.60569	4	8	6	0.0400248	0.966211	0.999963	up	no	NC_019458.2:10095147..10103406:+	gene143	gi|802976902|ref|XP_011950896.1|	7831	0	PREDICTED: zinc finger MYM-type protein 4 isoform X3 [Ovis aries]	gi|556733296|ref|XM_005962236.1|	6776	0	PREDICTED: Pantholops hodgsonii zinc finger, MYM-type 4 (ZMYM4), mRNA	Q5VZL5	91.3	1e-16	Zinc finger MYM-type protein 4	.	.	.	.	pfam12012	DUF3504	Domain of unknown function (DUF3504). This presumed domain is functionally uncharacterized. This domain is found in eukaryotes. This domain is typically between 156 to 173 amino acids in length.	GO:0007010|cytoskeleton organization;GO:0007275|multicellular organismal development;GO:0022604|regulation of cell morphogenesis;	GO:0005737|cytoplasm;GO:0005654|nucleoplasm;	GO:0003677|DNA binding;GO:0000981|RNA polymerase II transcription factor activity, sequence-specific DNA binding;GO:0008270|zinc ion binding;	.	.
oar_circ_0000034	0	0	0	0.361542	0	2	0	-1.3392	0.374749	NA	down	no	NC_019458.2:10095147..10110941:+	gene143	gi|802976902|ref|XP_011950896.1|	7831	0	PREDICTED: zinc finger MYM-type protein 4 isoform X3 [Ovis aries]	gi|556733296|ref|XM_005962236.1|	6776	0	PREDICTED: Pantholops hodgsonii zinc finger, MYM-type 4 (ZMYM4), mRNA	Q5VZL5	91.3	1e-16	Zinc finger MYM-type protein 4	.	.	.	.	pfam12012	DUF3504	Domain of unknown function (DUF3504). This presumed domain is functionally uncharacterized. This domain is found in eukaryotes. This domain is typically between 156 to 173 amino acids in length.	GO:0007010|cytoskeleton organization;GO:0007275|multicellular organismal development;GO:0022604|regulation of cell morphogenesis;	GO:0005737|cytoplasm;GO:0005654|nucleoplasm;	GO:0003677|DNA binding;GO:0000981|RNA polymerase II transcription factor activity, sequence-specific DNA binding;GO:0008270|zinc ion binding;	.	.
oar_circ_0000035	0	0	0	0.542314	0	3	0	-1.47697	0.333866	NA	down	no	NC_019458.2:10095147..10119843:+	gene143	gi|802976902|ref|XP_011950896.1|	7831	0	PREDICTED: zinc finger MYM-type protein 4 isoform X3 [Ovis aries]	gi|556733296|ref|XM_005962236.1|	6776	0	PREDICTED: Pantholops hodgsonii zinc finger, MYM-type 4 (ZMYM4), mRNA	Q5VZL5	91.3	1e-16	Zinc finger MYM-type protein 4	.	.	.	.	pfam12012	DUF3504	Domain of unknown function (DUF3504). This presumed domain is functionally uncharacterized. This domain is found in eukaryotes. This domain is typically between 156 to 173 amino acids in length.	GO:0007010|cytoskeleton organization;GO:0007275|multicellular organismal development;GO:0022604|regulation of cell morphogenesis;	GO:0005737|cytoplasm;GO:0005654|nucleoplasm;	GO:0003677|DNA binding;GO:0000981|RNA polymerase II transcription factor activity, sequence-specific DNA binding;GO:0008270|zinc ion binding;	.	.
oar_circ_0000036	6	9	7	6.66369	7	4	8	-0.0301113	0.973357	0.999963	down	no	NC_019458.2:10095147..10130337:+	gene143	gi|802976902|ref|XP_011950896.1|	7831	0	PREDICTED: zinc finger MYM-type protein 4 isoform X3 [Ovis aries]	gi|556733296|ref|XM_005962236.1|	6776	0	PREDICTED: Pantholops hodgsonii zinc finger, MYM-type 4 (ZMYM4), mRNA	Q5VZL5	91.3	1e-16	Zinc finger MYM-type protein 4	.	.	.	.	pfam12012	DUF3504	Domain of unknown function (DUF3504). This presumed domain is functionally uncharacterized. This domain is found in eukaryotes. This domain is typically between 156 to 173 amino acids in length.	GO:0007010|cytoskeleton organization;GO:0007275|multicellular organismal development;GO:0022604|regulation of cell morphogenesis;	GO:0005737|cytoplasm;GO:0005654|nucleoplasm;	GO:0003677|DNA binding;GO:0000981|RNA polymerase II transcription factor activity, sequence-specific DNA binding;GO:0008270|zinc ion binding;	.	.
oar_circ_0000037	0	0	0	0.530361	0	0	3	-1.47083	0.335636	NA	down	no	NC_019458.2:10095147..10140337:+	gene143	gi|802976902|ref|XP_011950896.1|	7831	0	PREDICTED: zinc finger MYM-type protein 4 isoform X3 [Ovis aries]	gi|556733296|ref|XM_005962236.1|	6776	0	PREDICTED: Pantholops hodgsonii zinc finger, MYM-type 4 (ZMYM4), mRNA	Q5VZL5	91.3	1e-16	Zinc finger MYM-type protein 4	.	.	.	.	pfam12012	DUF3504	Domain of unknown function (DUF3504). This presumed domain is functionally uncharacterized. This domain is found in eukaryotes. This domain is typically between 156 to 173 amino acids in length.	GO:0007010|cytoskeleton organization;GO:0007275|multicellular organismal development;GO:0022604|regulation of cell morphogenesis;	GO:0005737|cytoplasm;GO:0005654|nucleoplasm;	GO:0003677|DNA binding;GO:0000981|RNA polymerase II transcription factor activity, sequence-specific DNA binding;GO:0008270|zinc ion binding;	.	.
oar_circ_0000039	0	0	0	1.23989	4	3	0	-2.71238	0.0875365	NA	down	no	NC_019458.2:10099115..10110941:+	gene143	gi|802976902|ref|XP_011950896.1|	7831	0	PREDICTED: zinc finger MYM-type protein 4 isoform X3 [Ovis aries]	gi|556733296|ref|XM_005962236.1|	6776	0	PREDICTED: Pantholops hodgsonii zinc finger, MYM-type 4 (ZMYM4), mRNA	Q5VZL5	91.3	1e-16	Zinc finger MYM-type protein 4	.	.	.	.	pfam12012	DUF3504	Domain of unknown function (DUF3504). This presumed domain is functionally uncharacterized. This domain is found in eukaryotes. This domain is typically between 156 to 173 amino acids in length.	GO:0007010|cytoskeleton organization;GO:0007275|multicellular organismal development;GO:0022604|regulation of cell morphogenesis;	GO:0005737|cytoplasm;GO:0005654|nucleoplasm;	GO:0003677|DNA binding;GO:0000981|RNA polymerase II transcription factor activity, sequence-specific DNA binding;GO:0008270|zinc ion binding;	.	.
oar_circ_0000040	0	0	0	0.723085	0	4	0	-1.7554	0.261512	NA	down	no	NC_019458.2:10099115..10140337:+	gene143	gi|802976902|ref|XP_011950896.1|	7831	0	PREDICTED: zinc finger MYM-type protein 4 isoform X3 [Ovis aries]	gi|556733296|ref|XM_005962236.1|	6776	0	PREDICTED: Pantholops hodgsonii zinc finger, MYM-type 4 (ZMYM4), mRNA	Q5VZL5	91.3	1e-16	Zinc finger MYM-type protein 4	.	.	.	.	pfam12012	DUF3504	Domain of unknown function (DUF3504). This presumed domain is functionally uncharacterized. This domain is found in eukaryotes. This domain is typically between 156 to 173 amino acids in length.	GO:0007010|cytoskeleton organization;GO:0007275|multicellular organismal development;GO:0022604|regulation of cell morphogenesis;	GO:0005737|cytoplasm;GO:0005654|nucleoplasm;	GO:0003677|DNA binding;GO:0000981|RNA polymerase II transcription factor activity, sequence-specific DNA binding;GO:0008270|zinc ion binding;	.	.
oar_circ_0000042	5	0	0	1.06593	0	0	0	2.13959	0.178282	NA	up	no	NC_019458.2:10104833..10130337:+	gene143	gi|802976902|ref|XP_011950896.1|	7831	0	PREDICTED: zinc finger MYM-type protein 4 isoform X3 [Ovis aries]	gi|556733296|ref|XM_005962236.1|	6776	0	PREDICTED: Pantholops hodgsonii zinc finger, MYM-type 4 (ZMYM4), mRNA	Q5VZL5	91.3	1e-16	Zinc finger MYM-type protein 4	.	.	.	.	pfam12012	DUF3504	Domain of unknown function (DUF3504). This presumed domain is functionally uncharacterized. This domain is found in eukaryotes. This domain is typically between 156 to 173 amino acids in length.	GO:0007010|cytoskeleton organization;GO:0007275|multicellular organismal development;GO:0022604|regulation of cell morphogenesis;	GO:0005737|cytoplasm;GO:0005654|nucleoplasm;	GO:0003677|DNA binding;GO:0000981|RNA polymerase II transcription factor activity, sequence-specific DNA binding;GO:0008270|zinc ion binding;	.	.
oar_circ_0000043	0	0	0	0.542314	0	3	0	-1.47697	0.333866	NA	down	no	NC_019458.2:10110770..10119843:+	gene143	gi|802976902|ref|XP_011950896.1|	7831	0	PREDICTED: zinc finger MYM-type protein 4 isoform X3 [Ovis aries]	gi|556733296|ref|XM_005962236.1|	6776	0	PREDICTED: Pantholops hodgsonii zinc finger, MYM-type 4 (ZMYM4), mRNA	Q5VZL5	91.3	1e-16	Zinc finger MYM-type protein 4	.	.	.	.	pfam12012	DUF3504	Domain of unknown function (DUF3504). This presumed domain is functionally uncharacterized. This domain is found in eukaryotes. This domain is typically between 156 to 173 amino acids in length.	GO:0007010|cytoskeleton organization;GO:0007275|multicellular organismal development;GO:0022604|regulation of cell morphogenesis;	GO:0005737|cytoplasm;GO:0005654|nucleoplasm;	GO:0003677|DNA binding;GO:0000981|RNA polymerase II transcription factor activity, sequence-specific DNA binding;GO:0008270|zinc ion binding;	.	.
oar_circ_0000044	0	0	0	0.348789	2	0	0	-1.32922	0.377798	NA	down	no	NC_019458.2:10110770..10140337:+	gene143	gi|802976902|ref|XP_011950896.1|	7831	0	PREDICTED: zinc finger MYM-type protein 4 isoform X3 [Ovis aries]	gi|556733296|ref|XM_005962236.1|	6776	0	PREDICTED: Pantholops hodgsonii zinc finger, MYM-type 4 (ZMYM4), mRNA	Q5VZL5	91.3	1e-16	Zinc finger MYM-type protein 4	.	.	.	.	pfam12012	DUF3504	Domain of unknown function (DUF3504). This presumed domain is functionally uncharacterized. This domain is found in eukaryotes. This domain is typically between 156 to 173 amino acids in length.	GO:0007010|cytoskeleton organization;GO:0007275|multicellular organismal development;GO:0022604|regulation of cell morphogenesis;	GO:0005737|cytoplasm;GO:0005654|nucleoplasm;	GO:0003677|DNA binding;GO:0000981|RNA polymerase II transcription factor activity, sequence-specific DNA binding;GO:0008270|zinc ion binding;	.	.
oar_circ_0000045	0	3	0	0.738713	2	0	0	0.086114	0.956725	NA	up	no	NC_019458.2:10118714..10130337:+	gene143	gi|802976902|ref|XP_011950896.1|	7831	0	PREDICTED: zinc finger MYM-type protein 4 isoform X3 [Ovis aries]	gi|556733296|ref|XM_005962236.1|	6776	0	PREDICTED: Pantholops hodgsonii zinc finger, MYM-type 4 (ZMYM4), mRNA	Q5VZL5	91.3	1e-16	Zinc finger MYM-type protein 4	.	.	.	.	pfam12012	DUF3504	Domain of unknown function (DUF3504). This presumed domain is functionally uncharacterized. This domain is found in eukaryotes. This domain is typically between 156 to 173 amino acids in length.	GO:0007010|cytoskeleton organization;GO:0007275|multicellular organismal development;GO:0022604|regulation of cell morphogenesis;	GO:0005737|cytoplasm;GO:0005654|nucleoplasm;	GO:0003677|DNA binding;GO:0000981|RNA polymerase II transcription factor activity, sequence-specific DNA binding;GO:0008270|zinc ion binding;	.	.
oar_circ_0000046	0	7	0	1.62015	2	2	0	0.249825	0.869791	NA	up	no	NC_019458.2:10118714..10140337:+	gene143	gi|802976902|ref|XP_011950896.1|	7831	0	PREDICTED: zinc finger MYM-type protein 4 isoform X3 [Ovis aries]	gi|556733296|ref|XM_005962236.1|	6776	0	PREDICTED: Pantholops hodgsonii zinc finger, MYM-type 4 (ZMYM4), mRNA	Q5VZL5	91.3	1e-16	Zinc finger MYM-type protein 4	.	.	.	.	pfam12012	DUF3504	Domain of unknown function (DUF3504). This presumed domain is functionally uncharacterized. This domain is found in eukaryotes. This domain is typically between 156 to 173 amino acids in length.	GO:0007010|cytoskeleton organization;GO:0007275|multicellular organismal development;GO:0022604|regulation of cell morphogenesis;	GO:0005737|cytoplasm;GO:0005654|nucleoplasm;	GO:0003677|DNA binding;GO:0000981|RNA polymerase II transcription factor activity, sequence-specific DNA binding;GO:0008270|zinc ion binding;	.	.
oar_circ_0000047	0	2	0	0.613523	0	0	2	-0.171535	0.913111	NA	down	no	NC_019458.2:10127508..10130337:+	gene143	gi|802976902|ref|XP_011950896.1|	7831	0	PREDICTED: zinc finger MYM-type protein 4 isoform X3 [Ovis aries]	gi|556733296|ref|XM_005962236.1|	6776	0	PREDICTED: Pantholops hodgsonii zinc finger, MYM-type 4 (ZMYM4), mRNA	Q5VZL5	91.3	1e-16	Zinc finger MYM-type protein 4	.	.	.	.	pfam12012	DUF3504	Domain of unknown function (DUF3504). This presumed domain is functionally uncharacterized. This domain is found in eukaryotes. This domain is typically between 156 to 173 amino acids in length.	GO:0007010|cytoskeleton organization;GO:0007275|multicellular organismal development;GO:0022604|regulation of cell morphogenesis;	GO:0005737|cytoplasm;GO:0005654|nucleoplasm;	GO:0003677|DNA binding;GO:0000981|RNA polymerase II transcription factor activity, sequence-specific DNA binding;GO:0008270|zinc ion binding;	.	.
oar_circ_0000048	68	95	95	74.3813	63	88	51	0.0944311	0.802202	0.999963	up	no	NC_019458.2:10127508..10140337:+	gene143	gi|802976902|ref|XP_011950896.1|	7831	0	PREDICTED: zinc finger MYM-type protein 4 isoform X3 [Ovis aries]	gi|556733296|ref|XM_005962236.1|	6776	0	PREDICTED: Pantholops hodgsonii zinc finger, MYM-type 4 (ZMYM4), mRNA	Q5VZL5	91.3	1e-16	Zinc finger MYM-type protein 4	.	.	.	.	pfam12012	DUF3504	Domain of unknown function (DUF3504). This presumed domain is functionally uncharacterized. This domain is found in eukaryotes. This domain is typically between 156 to 173 amino acids in length.	GO:0007010|cytoskeleton organization;GO:0007275|multicellular organismal development;GO:0022604|regulation of cell morphogenesis;	GO:0005737|cytoplasm;GO:0005654|nucleoplasm;	GO:0003677|DNA binding;GO:0000981|RNA polymerase II transcription factor activity, sequence-specific DNA binding;GO:0008270|zinc ion binding;	.	.
oar_circ_0000050	0	0	0	0.361542	0	2	0	-1.3392	0.374749	NA	down	no	NC_019458.2:10127866..10140337:+	gene143	gi|802976902|ref|XP_011950896.1|	7831	0	PREDICTED: zinc finger MYM-type protein 4 isoform X3 [Ovis aries]	gi|556733296|ref|XM_005962236.1|	6776	0	PREDICTED: Pantholops hodgsonii zinc finger, MYM-type 4 (ZMYM4), mRNA	Q5VZL5	91.3	1e-16	Zinc finger MYM-type protein 4	.	.	.	.	pfam12012	DUF3504	Domain of unknown function (DUF3504). This presumed domain is functionally uncharacterized. This domain is found in eukaryotes. This domain is typically between 156 to 173 amino acids in length.	GO:0007010|cytoskeleton organization;GO:0007275|multicellular organismal development;GO:0022604|regulation of cell morphogenesis;	GO:0005737|cytoplasm;GO:0005654|nucleoplasm;	GO:0003677|DNA binding;GO:0000981|RNA polymerase II transcription factor activity, sequence-specific DNA binding;GO:0008270|zinc ion binding;	.	.
oar_circ_0000052	0	0	3	0.367144	0	0	0	1.3119	0.385146	NA	up	no	NC_019458.2:10203843..10209054:-	gene146	gi|802976913|ref|XP_011951354.1|	5207	0	PREDICTED: dyslexia-associated protein KIAA0319-like protein homolog isoform X1 [Ovis aries]	gi|548461583|ref|XM_005678716.1|	4109	0	PREDICTED: Capra hircus KIAA0319-like ortholog (KIAA0319L), transcript variant X1, mRNA	Q8IZA0	1756	0	Dyslexia-associated protein KIAA0319-like protein	VCA0027_2	63.2	1e-09	COG3979	pfam02010	REJ	REJ domain. The REJ (Receptor for Egg Jelly) domain is found in PKD1, and the sperm receptor for egg jelly. The function of this domain is unknown. The domain is 600 amino acids long so is probably composed of multiple structural domains. There are six completely conserved cysteine residues that may form disulphide bridges. This region contains tandem PKD-like domains.	.	GO:0031410|cytoplasmic vesicle;GO:0070062|extracellular exosome;GO:0000139|Golgi membrane;GO:0016021|integral component of membrane;GO:0005886|plasma membrane;	.	.	.
oar_circ_0000054	2	3	0	0.816294	0	0	0	2.03962	0.198945	NA	up	no	NC_019458.2:10203843..10221998:-	gene146	gi|802976913|ref|XP_011951354.1|	5207	0	PREDICTED: dyslexia-associated protein KIAA0319-like protein homolog isoform X1 [Ovis aries]	gi|548461583|ref|XM_005678716.1|	4109	0	PREDICTED: Capra hircus KIAA0319-like ortholog (KIAA0319L), transcript variant X1, mRNA	Q8IZA0	1756	0	Dyslexia-associated protein KIAA0319-like protein	VCA0027_2	63.2	1e-09	COG3979	pfam02010	REJ	REJ domain. The REJ (Receptor for Egg Jelly) domain is found in PKD1, and the sperm receptor for egg jelly. The function of this domain is unknown. The domain is 600 amino acids long so is probably composed of multiple structural domains. There are six completely conserved cysteine residues that may form disulphide bridges. This region contains tandem PKD-like domains.	.	GO:0031410|cytoplasmic vesicle;GO:0070062|extracellular exosome;GO:0000139|Golgi membrane;GO:0016021|integral component of membrane;GO:0005886|plasma membrane;	.	.	.
oar_circ_0000055	0	23	33	13.718	25	8	5	0.0870639	0.922728	0.999963	up	no	NC_019458.2:10219156..10221998:-	gene146	gi|802976913|ref|XP_011951354.1|	5207	0	PREDICTED: dyslexia-associated protein KIAA0319-like protein homolog isoform X1 [Ovis aries]	gi|548461583|ref|XM_005678716.1|	4109	0	PREDICTED: Capra hircus KIAA0319-like ortholog (KIAA0319L), transcript variant X1, mRNA	Q8IZA0	1756	0	Dyslexia-associated protein KIAA0319-like protein	VCA0027_2	63.2	1e-09	COG3979	pfam02010	REJ	REJ domain. The REJ (Receptor for Egg Jelly) domain is found in PKD1, and the sperm receptor for egg jelly. The function of this domain is unknown. The domain is 600 amino acids long so is probably composed of multiple structural domains. There are six completely conserved cysteine residues that may form disulphide bridges. This region contains tandem PKD-like domains.	.	GO:0031410|cytoplasmic vesicle;GO:0070062|extracellular exosome;GO:0000139|Golgi membrane;GO:0016021|integral component of membrane;GO:0005886|plasma membrane;	.	.	.
oar_circ_0000057	0	0	0	0.715116	0	2	2	-1.96022	0.215188	NA	down	no	NC_019458.2:10245485..10245996:-	gene146	gi|802976913|ref|XP_011951354.1|	5207	0	PREDICTED: dyslexia-associated protein KIAA0319-like protein homolog isoform X1 [Ovis aries]	gi|548461583|ref|XM_005678716.1|	4109	0	PREDICTED: Capra hircus KIAA0319-like ortholog (KIAA0319L), transcript variant X1, mRNA	Q8IZA0	1756	0	Dyslexia-associated protein KIAA0319-like protein	VCA0027_2	63.2	1e-09	COG3979	pfam02010	REJ	REJ domain. The REJ (Receptor for Egg Jelly) domain is found in PKD1, and the sperm receptor for egg jelly. The function of this domain is unknown. The domain is 600 amino acids long so is probably composed of multiple structural domains. There are six completely conserved cysteine residues that may form disulphide bridges. This region contains tandem PKD-like domains.	.	GO:0031410|cytoplasmic vesicle;GO:0070062|extracellular exosome;GO:0000139|Golgi membrane;GO:0016021|integral component of membrane;GO:0005886|plasma membrane;	.	.	.
oar_circ_0000058	0	2	0	0.259949	0	0	0	1.18697	0.42538	NA	up	no	NC_019458.2:102649471..102650224:-	gene1287	gi|426216675|ref|XP_004002583.1|	4943	0	PREDICTED: integrator complex subunit 3 [Ovis aries]	gi|548457419|ref|XM_005677486.1|	4327	0	PREDICTED: Capra hircus integrator complex subunit 3 (INTS3), mRNA	Q5RE70	1892	0	Integrator complex subunit 3	.	.	.	.	pfam10189	DUF2356	Conserved protein (DUF2356). This is a 200 amino acid region of a family of proteins conserved from plants to humans. Some members have been putatively annotated as being integrator complex subunit 3 but this could not be confirmed. The function is unknown.	GO:0006974|cellular response to DNA damage stimulus;GO:0006281|DNA repair;GO:0007093|mitotic cell cycle checkpoint;GO:0010212|response to ionizing radiation;	GO:0005634|nucleus;GO:0070876|SOSS complex;	.	K13140	INTS3; integrator complex subunit 3
oar_circ_0000059	2	0	0	0.426371	0	0	0	1.32953	0.379624	NA	up	no	NC_019458.2:102907063..102914217:-	gene1299	gi|802989239|ref|XP_012037581.1|	8766	0	PREDICTED: nuclear pore membrane glycoprotein 210-like isoform X1 [Ovis aries]	gi|548457381|ref|XM_005677467.1|	5115	0	PREDICTED: Capra hircus nucleoporin 210kDa-like (NUP210L), mRNA	Q5VU65	91.7	4e-17	Nuclear pore membrane glycoprotein 210-like	.	.	.	.	pfam02368	Big_2	Bacterial Ig-like domain (group 2). This family consists of bacterial domains with an Ig-like fold. Members of this family are found in bacterial and phage surface proteins such as intimins.	GO:0060009|Sertoli cell development;GO:0007286|spermatid development;	GO:0016021|integral component of membrane;GO:0005643|nuclear pore;	.	K14314	NUP210, GP210; nuclear pore complex protein Nup210
oar_circ_0000060	0	2	0	0.259949	0	0	0	1.18697	0.42538	NA	up	no	NC_019458.2:102987495..102997508:+	gene1307	gi|554545926|ref|XP_005867531.1|	3916	0	PREDICTED: ubiquitin-associated protein 2-like isoform X4 [Myotis brandtii]	gi|594039291|ref|XM_006044178.1|	3899	0	PREDICTED: Bubalus bubalis ubiquitin associated protein 2-like (UBAP2L), transcript variant X3, mRNA	Q14157	271	1e-72	Ubiquitin-associated protein 2-like	.	.	.	.	pfam12478	DUF3697	Ubiquitin-associated protein 2. This domain family is found in eukaryotes, and is approximately 30 amino acids in length. The family is found in association with pfam00627. There are two conserved sequence motifs: AVEMPG and QFG.	GO:0007339|binding of sperm to zona pellucida;GO:0061484|hematopoietic stem cell homeostasis;	GO:0005671|Ada2/Gcn5/Ada3 transcription activator complex;GO:0031519|PcG protein complex;	GO:0044822|poly(A) RNA binding;	.	.
oar_circ_0000061	0	0	0	0.715116	0	2	2	-1.96022	0.215188	NA	down	no	NC_019458.2:102994900..102997508:+	gene1307	gi|554545926|ref|XP_005867531.1|	3916	0	PREDICTED: ubiquitin-associated protein 2-like isoform X4 [Myotis brandtii]	gi|594039291|ref|XM_006044178.1|	3899	0	PREDICTED: Bubalus bubalis ubiquitin associated protein 2-like (UBAP2L), transcript variant X3, mRNA	Q14157	271	1e-72	Ubiquitin-associated protein 2-like	.	.	.	.	pfam12478	DUF3697	Ubiquitin-associated protein 2. This domain family is found in eukaryotes, and is approximately 30 amino acids in length. The family is found in association with pfam00627. There are two conserved sequence motifs: AVEMPG and QFG.	GO:0007339|binding of sperm to zona pellucida;GO:0061484|hematopoietic stem cell homeostasis;	GO:0005671|Ada2/Gcn5/Ada3 transcription activator complex;GO:0031519|PcG protein complex;	GO:0044822|poly(A) RNA binding;	.	.
oar_circ_0000063	2	3	0	2.21863	5	0	3	-0.598915	0.670377	0.999963	down	no	NC_019458.2:103132284..103134859:+	gene1311	gi|803006582|ref|XP_011962620.1|	2164	0	PREDICTED: interleukin-6 receptor subunit alpha isoform X1, partial [Ovis aries]	gi|548457552|ref|XM_005677550.1|	2342	0	PREDICTED: Capra hircus interleukin 6 receptor (IL6R), mRNA	O18796	633	0	Interleukin-6 receptor subunit alpha	.	.	.	.	pfam09240	IL6Ra-bind	Interleukin-6 receptor alpha chain, binding. Members of this family adopt a structure consisting of an immunoglobulin-like beta-sandwich, with seven strands in two beta-sheets, in a Greek-key topology. They are required for binding to the cytokine Interleukin-6.	.	GO:0016021|integral component of membrane;	GO:0004896|cytokine receptor activity;	K05055	IL6R; interleukin 6 receptor
oar_circ_0000065	0	2	0	0.975065	0	2	2	-0.776972	0.623412	NA	down	no	NC_019458.2:103394130..103411770:-	gene1319	gi|533197881|ref|XP_005411584.1|	3187	0	PREDICTED: small conductance calcium-activated potassium channel protein 3 isoform X1 [Chinchilla lanigera]	gi|594074410|ref|XM_006060947.1|	9645	0	PREDICTED: Bubalus bubalis potassium intermediate/small conductance calcium-activated channel, subfamily N, member 3 (KCNN3), transcript variant X1, mRNA	P58392	72.8	8e-11	Small conductance calcium-activated potassium channel protein 3	.	.	.	.	pfam03530	SK_channel	Calcium-activated SK potassium channel.	.	GO:0016021|integral component of membrane;GO:0043025|neuronal cell body;GO:0005886|plasma membrane;	GO:0005516|calmodulin binding;GO:0016286|small conductance calcium-activated potassium channel activity;	K04944	KCNN3; potassium intermediate/small conductance calcium-activated channel subfamily N member 3
oar_circ_0000067	0	0	2	0.593552	2	0	0	-0.192847	0.902149	NA	down	no	NC_019458.2:103607283..103611930:-	gene1320	gi|426216729|ref|XP_004002610.1|	873	3e-113	PREDICTED: phosphomevalonate kinase isoform X1 [Ovis aries]	gi|556759588|ref|XM_005975057.1|	1179	0	PREDICTED: Pantholops hodgsonii phosphomevalonate kinase (PMVK), mRNA	Q2KIU2	273	3e-88	Phosphomevalonate kinase	.	.	.	.	pfam04275	P-mevalo_kinase	Phosphomevalonate kinase. Phosphomevalonate kinase (EC:2.7.4.2) catalyses the phosphorylation of 5-phosphomevalonate into 5-diphosphomevalonate, an essential step in isoprenoid biosynthesis via the mevalonate pathway. This family represents the animal type of the enzyme. The other is the ERG8 type, found in plants and fungi, and some bacteria (see pfam00288).	GO:0006695|cholesterol biosynthetic process;GO:0019287|isopentenyl diphosphate biosynthetic process, mevalonate pathway;	GO:0005777|peroxisome;	GO:0005524|ATP binding;GO:0004631|phosphomevalonate kinase activity;	K13273	PMVK; phosphomevalonate kinase [EC:2.7.4.2]
oar_circ_0000069	0	0	4	0.489525	0	0	0	1.40878	0.355303	NA	up	no	NC_019458.2:103981216..103993109:-	gene1350	gi|426216789|ref|XP_004002640.1|	13330	0	PREDICTED: histone-lysine N-methyltransferase ASH1L isoform X1 [Ovis aries]	gi|548457200|ref|XM_005677381.1|	11306	0	PREDICTED: Capra hircus ash1 (absent, small, or homeotic)-like (Drosophila) (ASH1L), mRNA	Q9NR48	2222	0	Histone-lysine N-methyltransferase ASH1L	SPAC29B12.02c	151	3e-36	COG2940	pfam00856	SET	SET domain. SET domains are protein lysine methyltransferase enzymes. SET domains appear to be protein-protein interaction domains. It has been demonstrated that SET domains mediate interactions with a family of proteins that display similarity with dual-specificity phosphatases (dsPTPases). A subset of SET domains have been called PR domains. These domains are divergent in sequence from other SE…	GO:0007267|cell-cell signaling;GO:0006323|DNA packaging;GO:0097676|histone H3-K36 dimethylation;GO:0032635|interleukin-6 production;GO:0002674|negative regulation of acute inflammatory response;GO:0043124|negative regulation of I-kappaB kinase/NF-kappaB signaling;GO:0043409|negative regulation of MAPK cascade;GO:0045944|positive regulation of transcription from RNA polymerase II promoter;GO:00063…	GO:0005923|bicellular tight junction;GO:0005694|chromosome;GO:0005737|cytoplasm;GO:0070062|extracellular exosome;GO:0005794|Golgi apparatus;GO:0005654|nucleoplasm;GO:0005634|nucleus;	GO:0003682|chromatin binding;GO:0003677|DNA binding;GO:0046975|histone methyltransferase activity (H3-K36 specific);GO:0042800|histone methyltransferase activity (H3-K4 specific);GO:0008270|zinc ion binding;	K06101	ASH1L; histone-lysine N-methyltransferase ASH1L [EC:2.1.1.43]
oar_circ_0000070	0	0	4	0.838315	2	0	0	0.252351	0.874039	NA	up	no	NC_019458.2:103983706..103993109:-	gene1350	gi|426216789|ref|XP_004002640.1|	13330	0	PREDICTED: histone-lysine N-methyltransferase ASH1L isoform X1 [Ovis aries]	gi|548457200|ref|XM_005677381.1|	11306	0	PREDICTED: Capra hircus ash1 (absent, small, or homeotic)-like (Drosophila) (ASH1L), mRNA	Q9NR48	2222	0	Histone-lysine N-methyltransferase ASH1L	SPAC29B12.02c	151	3e-36	COG2940	pfam00856	SET	SET domain. SET domains are protein lysine methyltransferase enzymes. SET domains appear to be protein-protein interaction domains. It has been demonstrated that SET domains mediate interactions with a family of proteins that display similarity with dual-specificity phosphatases (dsPTPases). A subset of SET domains have been called PR domains. These domains are divergent in sequence from other SE…	GO:0007267|cell-cell signaling;GO:0006323|DNA packaging;GO:0097676|histone H3-K36 dimethylation;GO:0032635|interleukin-6 production;GO:0002674|negative regulation of acute inflammatory response;GO:0043124|negative regulation of I-kappaB kinase/NF-kappaB signaling;GO:0043409|negative regulation of MAPK cascade;GO:0045944|positive regulation of transcription from RNA polymerase II promoter;GO:00063…	GO:0005923|bicellular tight junction;GO:0005694|chromosome;GO:0005737|cytoplasm;GO:0070062|extracellular exosome;GO:0005794|Golgi apparatus;GO:0005654|nucleoplasm;GO:0005634|nucleus;	GO:0003682|chromatin binding;GO:0003677|DNA binding;GO:0046975|histone methyltransferase activity (H3-K36 specific);GO:0042800|histone methyltransferase activity (H3-K4 specific);GO:0008270|zinc ion binding;	K06101	ASH1L; histone-lysine N-methyltransferase ASH1L [EC:2.1.1.43]
oar_circ_0000071	2	4	4	2.48934	3	0	3	0.35314	0.786118	0.999963	up	no	NC_019458.2:103990353..103993109:-	gene1350	gi|426216789|ref|XP_004002640.1|	13330	0	PREDICTED: histone-lysine N-methyltransferase ASH1L isoform X1 [Ovis aries]	gi|548457200|ref|XM_005677381.1|	11306	0	PREDICTED: Capra hircus ash1 (absent, small, or homeotic)-like (Drosophila) (ASH1L), mRNA	Q9NR48	2222	0	Histone-lysine N-methyltransferase ASH1L	SPAC29B12.02c	151	3e-36	COG2940	pfam00856	SET	SET domain. SET domains are protein lysine methyltransferase enzymes. SET domains appear to be protein-protein interaction domains. It has been demonstrated that SET domains mediate interactions with a family of proteins that display similarity with dual-specificity phosphatases (dsPTPases). A subset of SET domains have been called PR domains. These domains are divergent in sequence from other SE…	GO:0007267|cell-cell signaling;GO:0006323|DNA packaging;GO:0097676|histone H3-K36 dimethylation;GO:0032635|interleukin-6 production;GO:0002674|negative regulation of acute inflammatory response;GO:0043124|negative regulation of I-kappaB kinase/NF-kappaB signaling;GO:0043409|negative regulation of MAPK cascade;GO:0045944|positive regulation of transcription from RNA polymerase II promoter;GO:00063…	GO:0005923|bicellular tight junction;GO:0005694|chromosome;GO:0005737|cytoplasm;GO:0070062|extracellular exosome;GO:0005794|Golgi apparatus;GO:0005654|nucleoplasm;GO:0005634|nucleus;	GO:0003682|chromatin binding;GO:0003677|DNA binding;GO:0046975|histone methyltransferase activity (H3-K36 specific);GO:0042800|histone methyltransferase activity (H3-K4 specific);GO:0008270|zinc ion binding;	K06101	ASH1L; histone-lysine N-methyltransferase ASH1L [EC:2.1.1.43]
oar_circ_0000072	0	0	0	0.542314	0	3	0	-1.47697	0.333866	NA	down	no	NC_019458.2:104010781..104011249:-	gene1350	gi|426216789|ref|XP_004002640.1|	13330	0	PREDICTED: histone-lysine N-methyltransferase ASH1L isoform X1 [Ovis aries]	gi|548457200|ref|XM_005677381.1|	11306	0	PREDICTED: Capra hircus ash1 (absent, small, or homeotic)-like (Drosophila) (ASH1L), mRNA	Q9NR48	2222	0	Histone-lysine N-methyltransferase ASH1L	SPAC29B12.02c	151	3e-36	COG2940	pfam00856	SET	SET domain. SET domains are protein lysine methyltransferase enzymes. SET domains appear to be protein-protein interaction domains. It has been demonstrated that SET domains mediate interactions with a family of proteins that display similarity with dual-specificity phosphatases (dsPTPases). A subset of SET domains have been called PR domains. These domains are divergent in sequence from other SE…	GO:0007267|cell-cell signaling;GO:0006323|DNA packaging;GO:0097676|histone H3-K36 dimethylation;GO:0032635|interleukin-6 production;GO:0002674|negative regulation of acute inflammatory response;GO:0043124|negative regulation of I-kappaB kinase/NF-kappaB signaling;GO:0043409|negative regulation of MAPK cascade;GO:0045944|positive regulation of transcription from RNA polymerase II promoter;GO:00063…	GO:0005923|bicellular tight junction;GO:0005694|chromosome;GO:0005737|cytoplasm;GO:0070062|extracellular exosome;GO:0005794|Golgi apparatus;GO:0005654|nucleoplasm;GO:0005634|nucleus;	GO:0003682|chromatin binding;GO:0003677|DNA binding;GO:0046975|histone methyltransferase activity (H3-K36 specific);GO:0042800|histone methyltransferase activity (H3-K4 specific);GO:0008270|zinc ion binding;	K06101	ASH1L; histone-lysine N-methyltransferase ASH1L [EC:2.1.1.43]
oar_circ_0000073	0	2	4	0.749474	0	0	0	1.96584	0.21471	NA	up	no	NC_019458.2:104010781..104027547:-	gene1350	gi|426216789|ref|XP_004002640.1|	13330	0	PREDICTED: histone-lysine N-methyltransferase ASH1L isoform X1 [Ovis aries]	gi|548457200|ref|XM_005677381.1|	11306	0	PREDICTED: Capra hircus ash1 (absent, small, or homeotic)-like (Drosophila) (ASH1L), mRNA	Q9NR48	2222	0	Histone-lysine N-methyltransferase ASH1L	SPAC29B12.02c	151	3e-36	COG2940	pfam00856	SET	SET domain. SET domains are protein lysine methyltransferase enzymes. SET domains appear to be protein-protein interaction domains. It has been demonstrated that SET domains mediate interactions with a family of proteins that display similarity with dual-specificity phosphatases (dsPTPases). A subset of SET domains have been called PR domains. These domains are divergent in sequence from other SE…	GO:0007267|cell-cell signaling;GO:0006323|DNA packaging;GO:0097676|histone H3-K36 dimethylation;GO:0032635|interleukin-6 production;GO:0002674|negative regulation of acute inflammatory response;GO:0043124|negative regulation of I-kappaB kinase/NF-kappaB signaling;GO:0043409|negative regulation of MAPK cascade;GO:0045944|positive regulation of transcription from RNA polymerase II promoter;GO:00063…	GO:0005923|bicellular tight junction;GO:0005694|chromosome;GO:0005737|cytoplasm;GO:0070062|extracellular exosome;GO:0005794|Golgi apparatus;GO:0005654|nucleoplasm;GO:0005634|nucleus;	GO:0003682|chromatin binding;GO:0003677|DNA binding;GO:0046975|histone methyltransferase activity (H3-K36 specific);GO:0042800|histone methyltransferase activity (H3-K4 specific);GO:0008270|zinc ion binding;	K06101	ASH1L; histone-lysine N-methyltransferase ASH1L [EC:2.1.1.43]
oar_circ_0000075	0	0	0	0.348789	2	0	0	-1.32922	0.377798	NA	down	no	NC_019458.2:104010781..104089468:-	gene1350	gi|426216789|ref|XP_004002640.1|	13330	0	PREDICTED: histone-lysine N-methyltransferase ASH1L isoform X1 [Ovis aries]	gi|548457200|ref|XM_005677381.1|	11306	0	PREDICTED: Capra hircus ash1 (absent, small, or homeotic)-like (Drosophila) (ASH1L), mRNA	Q9NR48	2222	0	Histone-lysine N-methyltransferase ASH1L	SPAC29B12.02c	151	3e-36	COG2940	pfam00856	SET	SET domain. SET domains are protein lysine methyltransferase enzymes. SET domains appear to be protein-protein interaction domains. It has been demonstrated that SET domains mediate interactions with a family of proteins that display similarity with dual-specificity phosphatases (dsPTPases). A subset of SET domains have been called PR domains. These domains are divergent in sequence from other SE…	GO:0007267|cell-cell signaling;GO:0006323|DNA packaging;GO:0097676|histone H3-K36 dimethylation;GO:0032635|interleukin-6 production;GO:0002674|negative regulation of acute inflammatory response;GO:0043124|negative regulation of I-kappaB kinase/NF-kappaB signaling;GO:0043409|negative regulation of MAPK cascade;GO:0045944|positive regulation of transcription from RNA polymerase II promoter;GO:00063…	GO:0005923|bicellular tight junction;GO:0005694|chromosome;GO:0005737|cytoplasm;GO:0070062|extracellular exosome;GO:0005794|Golgi apparatus;GO:0005654|nucleoplasm;GO:0005634|nucleus;	GO:0003682|chromatin binding;GO:0003677|DNA binding;GO:0046975|histone methyltransferase activity (H3-K36 specific);GO:0042800|histone methyltransferase activity (H3-K4 specific);GO:0008270|zinc ion binding;	K06101	ASH1L; histone-lysine N-methyltransferase ASH1L [EC:2.1.1.43]
oar_circ_0000078	0	0	0	0.353574	0	0	2	-1.33301	0.37664	NA	down	no	NC_019458.2:104027453..104073383:-	gene1350	gi|426216789|ref|XP_004002640.1|	13330	0	PREDICTED: histone-lysine N-methyltransferase ASH1L isoform X1 [Ovis aries]	gi|548457200|ref|XM_005677381.1|	11306	0	PREDICTED: Capra hircus ash1 (absent, small, or homeotic)-like (Drosophila) (ASH1L), mRNA	Q9NR48	2222	0	Histone-lysine N-methyltransferase ASH1L	SPAC29B12.02c	151	3e-36	COG2940	pfam00856	SET	SET domain. SET domains are protein lysine methyltransferase enzymes. SET domains appear to be protein-protein interaction domains. It has been demonstrated that SET domains mediate interactions with a family of proteins that display similarity with dual-specificity phosphatases (dsPTPases). A subset of SET domains have been called PR domains. These domains are divergent in sequence from other SE…	GO:0007267|cell-cell signaling;GO:0006323|DNA packaging;GO:0097676|histone H3-K36 dimethylation;GO:0032635|interleukin-6 production;GO:0002674|negative regulation of acute inflammatory response;GO:0043124|negative regulation of I-kappaB kinase/NF-kappaB signaling;GO:0043409|negative regulation of MAPK cascade;GO:0045944|positive regulation of transcription from RNA polymerase II promoter;GO:00063…	GO:0005923|bicellular tight junction;GO:0005694|chromosome;GO:0005737|cytoplasm;GO:0070062|extracellular exosome;GO:0005794|Golgi apparatus;GO:0005654|nucleoplasm;GO:0005634|nucleus;	GO:0003682|chromatin binding;GO:0003677|DNA binding;GO:0046975|histone methyltransferase activity (H3-K36 specific);GO:0042800|histone methyltransferase activity (H3-K4 specific);GO:0008270|zinc ion binding;	K06101	ASH1L; histone-lysine N-methyltransferase ASH1L [EC:2.1.1.43]
oar_circ_0000079	14	24	10	12.1289	5	10	12	0.565152	0.45367	0.999963	up	no	NC_019458.2:104027453..104089468:-	gene1350	gi|426216789|ref|XP_004002640.1|	13330	0	PREDICTED: histone-lysine N-methyltransferase ASH1L isoform X1 [Ovis aries]	gi|548457200|ref|XM_005677381.1|	11306	0	PREDICTED: Capra hircus ash1 (absent, small, or homeotic)-like (Drosophila) (ASH1L), mRNA	Q9NR48	2222	0	Histone-lysine N-methyltransferase ASH1L	SPAC29B12.02c	151	3e-36	COG2940	pfam00856	SET	SET domain. SET domains are protein lysine methyltransferase enzymes. SET domains appear to be protein-protein interaction domains. It has been demonstrated that SET domains mediate interactions with a family of proteins that display similarity with dual-specificity phosphatases (dsPTPases). A subset of SET domains have been called PR domains. These domains are divergent in sequence from other SE…	GO:0007267|cell-cell signaling;GO:0006323|DNA packaging;GO:0097676|histone H3-K36 dimethylation;GO:0032635|interleukin-6 production;GO:0002674|negative regulation of acute inflammatory response;GO:0043124|negative regulation of I-kappaB kinase/NF-kappaB signaling;GO:0043409|negative regulation of MAPK cascade;GO:0045944|positive regulation of transcription from RNA polymerase II promoter;GO:00063…	GO:0005923|bicellular tight junction;GO:0005694|chromosome;GO:0005737|cytoplasm;GO:0070062|extracellular exosome;GO:0005794|Golgi apparatus;GO:0005654|nucleoplasm;GO:0005634|nucleus;	GO:0003682|chromatin binding;GO:0003677|DNA binding;GO:0046975|histone methyltransferase activity (H3-K36 specific);GO:0042800|histone methyltransferase activity (H3-K4 specific);GO:0008270|zinc ion binding;	K06101	ASH1L; histone-lysine N-methyltransferase ASH1L [EC:2.1.1.43]
oar_circ_0000080	4	9	6	4.87584	6	3	3	0.336898	0.739962	0.999963	up	no	NC_019458.2:104027453..104091635:-	Null	.	.	.	.	.	.	.	.	.	.	.	.	.	.	.	.	.	.	.	.	.	.	.	.
oar_circ_0000080	4	9	6	4.87584	6	3	3	0.336898	0.739962	0.999963	up	no	NC_019458.2:104027453..104091635:-	gene1350	gi|426216789|ref|XP_004002640.1|	13330	0	PREDICTED: histone-lysine N-methyltransferase ASH1L isoform X1 [Ovis aries]	gi|548457200|ref|XM_005677381.1|	11306	0	PREDICTED: Capra hircus ash1 (absent, small, or homeotic)-like (Drosophila) (ASH1L), mRNA	Q9NR48	2222	0	Histone-lysine N-methyltransferase ASH1L	SPAC29B12.02c	151	3e-36	COG2940	pfam00856	SET	SET domain. SET domains are protein lysine methyltransferase enzymes. SET domains appear to be protein-protein interaction domains. It has been demonstrated that SET domains mediate interactions with a family of proteins that display similarity with dual-specificity phosphatases (dsPTPases). A subset of SET domains have been called PR domains. These domains are divergent in sequence from other SE…	GO:0007267|cell-cell signaling;GO:0006323|DNA packaging;GO:0097676|histone H3-K36 dimethylation;GO:0032635|interleukin-6 production;GO:0002674|negative regulation of acute inflammatory response;GO:0043124|negative regulation of I-kappaB kinase/NF-kappaB signaling;GO:0043409|negative regulation of MAPK cascade;GO:0045944|positive regulation of transcription from RNA polymerase II promoter;GO:00063…	GO:0005923|bicellular tight junction;GO:0005694|chromosome;GO:0005737|cytoplasm;GO:0070062|extracellular exosome;GO:0005794|Golgi apparatus;GO:0005654|nucleoplasm;GO:0005634|nucleus;	GO:0003682|chromatin binding;GO:0003677|DNA binding;GO:0046975|histone methyltransferase activity (H3-K36 specific);GO:0042800|histone methyltransferase activity (H3-K4 specific);GO:0008270|zinc ion binding;	K06101	ASH1L; histone-lysine N-methyltransferase ASH1L [EC:2.1.1.43]
oar_circ_0000081	0	0	0	0.87915	2	0	3	-2.23298	0.160585	NA	down	no	NC_019458.2:104027453..104143185:-	gene1350	gi|426216789|ref|XP_004002640.1|	13330	0	PREDICTED: histone-lysine N-methyltransferase ASH1L isoform X1 [Ovis aries]	gi|548457200|ref|XM_005677381.1|	11306	0	PREDICTED: Capra hircus ash1 (absent, small, or homeotic)-like (Drosophila) (ASH1L), mRNA	Q9NR48	2222	0	Histone-lysine N-methyltransferase ASH1L	SPAC29B12.02c	151	3e-36	COG2940	pfam00856	SET	SET domain. SET domains are protein lysine methyltransferase enzymes. SET domains appear to be protein-protein interaction domains. It has been demonstrated that SET domains mediate interactions with a family of proteins that display similarity with dual-specificity phosphatases (dsPTPases). A subset of SET domains have been called PR domains. These domains are divergent in sequence from other SE…	GO:0007267|cell-cell signaling;GO:0006323|DNA packaging;GO:0097676|histone H3-K36 dimethylation;GO:0032635|interleukin-6 production;GO:0002674|negative regulation of acute inflammatory response;GO:0043124|negative regulation of I-kappaB kinase/NF-kappaB signaling;GO:0043409|negative regulation of MAPK cascade;GO:0045944|positive regulation of transcription from RNA polymerase II promoter;GO:00063…	GO:0005923|bicellular tight junction;GO:0005694|chromosome;GO:0005737|cytoplasm;GO:0070062|extracellular exosome;GO:0005794|Golgi apparatus;GO:0005654|nucleoplasm;GO:0005634|nucleus;	GO:0003682|chromatin binding;GO:0003677|DNA binding;GO:0046975|histone methyltransferase activity (H3-K36 specific);GO:0042800|histone methyltransferase activity (H3-K4 specific);GO:0008270|zinc ion binding;	K06101	ASH1L; histone-lysine N-methyltransferase ASH1L [EC:2.1.1.43]
oar_circ_0000082	0	0	3	1.2439	3	0	2	-0.720614	0.643598	NA	down	no	NC_019458.2:104055127..104073383:-	gene1350	gi|426216789|ref|XP_004002640.1|	13330	0	PREDICTED: histone-lysine N-methyltransferase ASH1L isoform X1 [Ovis aries]	gi|548457200|ref|XM_005677381.1|	11306	0	PREDICTED: Capra hircus ash1 (absent, small, or homeotic)-like (Drosophila) (ASH1L), mRNA	Q9NR48	2222	0	Histone-lysine N-methyltransferase ASH1L	SPAC29B12.02c	151	3e-36	COG2940	pfam00856	SET	SET domain. SET domains are protein lysine methyltransferase enzymes. SET domains appear to be protein-protein interaction domains. It has been demonstrated that SET domains mediate interactions with a family of proteins that display similarity with dual-specificity phosphatases (dsPTPases). A subset of SET domains have been called PR domains. These domains are divergent in sequence from other SE…	GO:0007267|cell-cell signaling;GO:0006323|DNA packaging;GO:0097676|histone H3-K36 dimethylation;GO:0032635|interleukin-6 production;GO:0002674|negative regulation of acute inflammatory response;GO:0043124|negative regulation of I-kappaB kinase/NF-kappaB signaling;GO:0043409|negative regulation of MAPK cascade;GO:0045944|positive regulation of transcription from RNA polymerase II promoter;GO:00063…	GO:0005923|bicellular tight junction;GO:0005694|chromosome;GO:0005737|cytoplasm;GO:0070062|extracellular exosome;GO:0005794|Golgi apparatus;GO:0005654|nucleoplasm;GO:0005634|nucleus;	GO:0003682|chromatin binding;GO:0003677|DNA binding;GO:0046975|histone methyltransferase activity (H3-K36 specific);GO:0042800|histone methyltransferase activity (H3-K4 specific);GO:0008270|zinc ion binding;	K06101	ASH1L; histone-lysine N-methyltransferase ASH1L [EC:2.1.1.43]
oar_circ_0000083	4	4	3	3.34122	4	5	0	0.0808414	0.947152	0.999963	up	no	NC_019458.2:104064292..104073383:-	gene1350	gi|426216789|ref|XP_004002640.1|	13330	0	PREDICTED: histone-lysine N-methyltransferase ASH1L isoform X1 [Ovis aries]	gi|548457200|ref|XM_005677381.1|	11306	0	PREDICTED: Capra hircus ash1 (absent, small, or homeotic)-like (Drosophila) (ASH1L), mRNA	Q9NR48	2222	0	Histone-lysine N-methyltransferase ASH1L	SPAC29B12.02c	151	3e-36	COG2940	pfam00856	SET	SET domain. SET domains are protein lysine methyltransferase enzymes. SET domains appear to be protein-protein interaction domains. It has been demonstrated that SET domains mediate interactions with a family of proteins that display similarity with dual-specificity phosphatases (dsPTPases). A subset of SET domains have been called PR domains. These domains are divergent in sequence from other SE…	GO:0007267|cell-cell signaling;GO:0006323|DNA packaging;GO:0097676|histone H3-K36 dimethylation;GO:0032635|interleukin-6 production;GO:0002674|negative regulation of acute inflammatory response;GO:0043124|negative regulation of I-kappaB kinase/NF-kappaB signaling;GO:0043409|negative regulation of MAPK cascade;GO:0045944|positive regulation of transcription from RNA polymerase II promoter;GO:00063…	GO:0005923|bicellular tight junction;GO:0005694|chromosome;GO:0005737|cytoplasm;GO:0070062|extracellular exosome;GO:0005794|Golgi apparatus;GO:0005654|nucleoplasm;GO:0005634|nucleus;	GO:0003682|chromatin binding;GO:0003677|DNA binding;GO:0046975|histone methyltransferase activity (H3-K36 specific);GO:0042800|histone methyltransferase activity (H3-K4 specific);GO:0008270|zinc ion binding;	K06101	ASH1L; histone-lysine N-methyltransferase ASH1L [EC:2.1.1.43]
oar_circ_0000084	90	131	131	106.744	99	116	92	-0.0632796	0.843751	0.999963	down	no	NC_019458.2:104064292..104089468:-	gene1350	gi|426216789|ref|XP_004002640.1|	13330	0	PREDICTED: histone-lysine N-methyltransferase ASH1L isoform X1 [Ovis aries]	gi|548457200|ref|XM_005677381.1|	11306	0	PREDICTED: Capra hircus ash1 (absent, small, or homeotic)-like (Drosophila) (ASH1L), mRNA	Q9NR48	2222	0	Histone-lysine N-methyltransferase ASH1L	SPAC29B12.02c	151	3e-36	COG2940	pfam00856	SET	SET domain. SET domains are protein lysine methyltransferase enzymes. SET domains appear to be protein-protein interaction domains. It has been demonstrated that SET domains mediate interactions with a family of proteins that display similarity with dual-specificity phosphatases (dsPTPases). A subset of SET domains have been called PR domains. These domains are divergent in sequence from other SE…	GO:0007267|cell-cell signaling;GO:0006323|DNA packaging;GO:0097676|histone H3-K36 dimethylation;GO:0032635|interleukin-6 production;GO:0002674|negative regulation of acute inflammatory response;GO:0043124|negative regulation of I-kappaB kinase/NF-kappaB signaling;GO:0043409|negative regulation of MAPK cascade;GO:0045944|positive regulation of transcription from RNA polymerase II promoter;GO:00063…	GO:0005923|bicellular tight junction;GO:0005694|chromosome;GO:0005737|cytoplasm;GO:0070062|extracellular exosome;GO:0005794|Golgi apparatus;GO:0005654|nucleoplasm;GO:0005634|nucleus;	GO:0003682|chromatin binding;GO:0003677|DNA binding;GO:0046975|histone methyltransferase activity (H3-K36 specific);GO:0042800|histone methyltransferase activity (H3-K4 specific);GO:0008270|zinc ion binding;	K06101	ASH1L; histone-lysine N-methyltransferase ASH1L [EC:2.1.1.43]
oar_circ_0000085	4	7	4	3.65442	5	0	3	0.560792	0.63635	0.999963	up	no	NC_019458.2:104064292..104091635:-	Null	.	.	.	.	.	.	.	.	.	.	.	.	.	.	.	.	.	.	.	.	.	.	.	.
oar_circ_0000086	0	0	2	0.593552	2	0	0	-0.192847	0.902149	NA	down	no	NC_019458.2:104064292..104110426:-	gene1350	gi|426216789|ref|XP_004002640.1|	13330	0	PREDICTED: histone-lysine N-methyltransferase ASH1L isoform X1 [Ovis aries]	gi|548457200|ref|XM_005677381.1|	11306	0	PREDICTED: Capra hircus ash1 (absent, small, or homeotic)-like (Drosophila) (ASH1L), mRNA	Q9NR48	2222	0	Histone-lysine N-methyltransferase ASH1L	SPAC29B12.02c	151	3e-36	COG2940	pfam00856	SET	SET domain. SET domains are protein lysine methyltransferase enzymes. SET domains appear to be protein-protein interaction domains. It has been demonstrated that SET domains mediate interactions with a family of proteins that display similarity with dual-specificity phosphatases (dsPTPases). A subset of SET domains have been called PR domains. These domains are divergent in sequence from other SE…	GO:0007267|cell-cell signaling;GO:0006323|DNA packaging;GO:0097676|histone H3-K36 dimethylation;GO:0032635|interleukin-6 production;GO:0002674|negative regulation of acute inflammatory response;GO:0043124|negative regulation of I-kappaB kinase/NF-kappaB signaling;GO:0043409|negative regulation of MAPK cascade;GO:0045944|positive regulation of transcription from RNA polymerase II promoter;GO:00063…	GO:0005923|bicellular tight junction;GO:0005694|chromosome;GO:0005737|cytoplasm;GO:0070062|extracellular exosome;GO:0005794|Golgi apparatus;GO:0005654|nucleoplasm;GO:0005634|nucleus;	GO:0003682|chromatin binding;GO:0003677|DNA binding;GO:0046975|histone methyltransferase activity (H3-K36 specific);GO:0042800|histone methyltransferase activity (H3-K4 specific);GO:0008270|zinc ion binding;	K06101	ASH1L; histone-lysine N-methyltransferase ASH1L [EC:2.1.1.43]
oar_circ_0000087	8	8	21	12.0595	14	15	9	-0.319989	0.663447	0.999963	down	no	NC_019458.2:104064292..104143185:-	gene1350	gi|426216789|ref|XP_004002640.1|	13330	0	PREDICTED: histone-lysine N-methyltransferase ASH1L isoform X1 [Ovis aries]	gi|548457200|ref|XM_005677381.1|	11306	0	PREDICTED: Capra hircus ash1 (absent, small, or homeotic)-like (Drosophila) (ASH1L), mRNA	Q9NR48	2222	0	Histone-lysine N-methyltransferase ASH1L	SPAC29B12.02c	151	3e-36	COG2940	pfam00856	SET	SET domain. SET domains are protein lysine methyltransferase enzymes. SET domains appear to be protein-protein interaction domains. It has been demonstrated that SET domains mediate interactions with a family of proteins that display similarity with dual-specificity phosphatases (dsPTPases). A subset of SET domains have been called PR domains. These domains are divergent in sequence from other SE…	GO:0007267|cell-cell signaling;GO:0006323|DNA packaging;GO:0097676|histone H3-K36 dimethylation;GO:0032635|interleukin-6 production;GO:0002674|negative regulation of acute inflammatory response;GO:0043124|negative regulation of I-kappaB kinase/NF-kappaB signaling;GO:0043409|negative regulation of MAPK cascade;GO:0045944|positive regulation of transcription from RNA polymerase II promoter;GO:00063…	GO:0005923|bicellular tight junction;GO:0005694|chromosome;GO:0005737|cytoplasm;GO:0070062|extracellular exosome;GO:0005794|Golgi apparatus;GO:0005654|nucleoplasm;GO:0005634|nucleus;	GO:0003682|chromatin binding;GO:0003677|DNA binding;GO:0046975|histone methyltransferase activity (H3-K36 specific);GO:0042800|histone methyltransferase activity (H3-K4 specific);GO:0008270|zinc ion binding;	K06101	ASH1L; histone-lysine N-methyltransferase ASH1L [EC:2.1.1.43]
oar_circ_0000088	4	0	0	0.852741	0	0	0	1.86391	0.237023	NA	up	no	NC_019458.2:104064292..104157668:-	gene1350	gi|426216789|ref|XP_004002640.1|	13330	0	PREDICTED: histone-lysine N-methyltransferase ASH1L isoform X1 [Ovis aries]	gi|548457200|ref|XM_005677381.1|	11306	0	PREDICTED: Capra hircus ash1 (absent, small, or homeotic)-like (Drosophila) (ASH1L), mRNA	Q9NR48	2222	0	Histone-lysine N-methyltransferase ASH1L	SPAC29B12.02c	151	3e-36	COG2940	pfam00856	SET	SET domain. SET domains are protein lysine methyltransferase enzymes. SET domains appear to be protein-protein interaction domains. It has been demonstrated that SET domains mediate interactions with a family of proteins that display similarity with dual-specificity phosphatases (dsPTPases). A subset of SET domains have been called PR domains. These domains are divergent in sequence from other SE…	GO:0007267|cell-cell signaling;GO:0006323|DNA packaging;GO:0097676|histone H3-K36 dimethylation;GO:0032635|interleukin-6 production;GO:0002674|negative regulation of acute inflammatory response;GO:0043124|negative regulation of I-kappaB kinase/NF-kappaB signaling;GO:0043409|negative regulation of MAPK cascade;GO:0045944|positive regulation of transcription from RNA polymerase II promoter;GO:00063…	GO:0005923|bicellular tight junction;GO:0005694|chromosome;GO:0005737|cytoplasm;GO:0070062|extracellular exosome;GO:0005794|Golgi apparatus;GO:0005654|nucleoplasm;GO:0005634|nucleus;	GO:0003682|chromatin binding;GO:0003677|DNA binding;GO:0046975|histone methyltransferase activity (H3-K36 specific);GO:0042800|histone methyltransferase activity (H3-K4 specific);GO:0008270|zinc ion binding;	K06101	ASH1L; histone-lysine N-methyltransferase ASH1L [EC:2.1.1.43]
oar_circ_0000089	3	3	4	3.09573	6	0	3	-0.0563776	0.963848	0.999963	down	no	NC_019458.2:104072639..104073383:-	gene1350	gi|426216789|ref|XP_004002640.1|	13330	0	PREDICTED: histone-lysine N-methyltransferase ASH1L isoform X1 [Ovis aries]	gi|548457200|ref|XM_005677381.1|	11306	0	PREDICTED: Capra hircus ash1 (absent, small, or homeotic)-like (Drosophila) (ASH1L), mRNA	Q9NR48	2222	0	Histone-lysine N-methyltransferase ASH1L	SPAC29B12.02c	151	3e-36	COG2940	pfam00856	SET	SET domain. SET domains are protein lysine methyltransferase enzymes. SET domains appear to be protein-protein interaction domains. It has been demonstrated that SET domains mediate interactions with a family of proteins that display similarity with dual-specificity phosphatases (dsPTPases). A subset of SET domains have been called PR domains. These domains are divergent in sequence from other SE…	GO:0007267|cell-cell signaling;GO:0006323|DNA packaging;GO:0097676|histone H3-K36 dimethylation;GO:0032635|interleukin-6 production;GO:0002674|negative regulation of acute inflammatory response;GO:0043124|negative regulation of I-kappaB kinase/NF-kappaB signaling;GO:0043409|negative regulation of MAPK cascade;GO:0045944|positive regulation of transcription from RNA polymerase II promoter;GO:00063…	GO:0005923|bicellular tight junction;GO:0005694|chromosome;GO:0005737|cytoplasm;GO:0070062|extracellular exosome;GO:0005794|Golgi apparatus;GO:0005654|nucleoplasm;GO:0005634|nucleus;	GO:0003682|chromatin binding;GO:0003677|DNA binding;GO:0046975|histone methyltransferase activity (H3-K36 specific);GO:0042800|histone methyltransferase activity (H3-K4 specific);GO:0008270|zinc ion binding;	K06101	ASH1L; histone-lysine N-methyltransferase ASH1L [EC:2.1.1.43]
oar_circ_0000090	81	113	99	91.4513	92	100	75	-0.108865	0.752039	0.999963	down	no	NC_019458.2:104072639..104089468:-	gene1350	gi|426216789|ref|XP_004002640.1|	13330	0	PREDICTED: histone-lysine N-methyltransferase ASH1L isoform X1 [Ovis aries]	gi|548457200|ref|XM_005677381.1|	11306	0	PREDICTED: Capra hircus ash1 (absent, small, or homeotic)-like (Drosophila) (ASH1L), mRNA	Q9NR48	2222	0	Histone-lysine N-methyltransferase ASH1L	SPAC29B12.02c	151	3e-36	COG2940	pfam00856	SET	SET domain. SET domains are protein lysine methyltransferase enzymes. SET domains appear to be protein-protein interaction domains. It has been demonstrated that SET domains mediate interactions with a family of proteins that display similarity with dual-specificity phosphatases (dsPTPases). A subset of SET domains have been called PR domains. These domains are divergent in sequence from other SE…	GO:0007267|cell-cell signaling;GO:0006323|DNA packaging;GO:0097676|histone H3-K36 dimethylation;GO:0032635|interleukin-6 production;GO:0002674|negative regulation of acute inflammatory response;GO:0043124|negative regulation of I-kappaB kinase/NF-kappaB signaling;GO:0043409|negative regulation of MAPK cascade;GO:0045944|positive regulation of transcription from RNA polymerase II promoter;GO:00063…	GO:0005923|bicellular tight junction;GO:0005694|chromosome;GO:0005737|cytoplasm;GO:0070062|extracellular exosome;GO:0005794|Golgi apparatus;GO:0005654|nucleoplasm;GO:0005634|nucleus;	GO:0003682|chromatin binding;GO:0003677|DNA binding;GO:0046975|histone methyltransferase activity (H3-K36 specific);GO:0042800|histone methyltransferase activity (H3-K4 specific);GO:0008270|zinc ion binding;	K06101	ASH1L; histone-lysine N-methyltransferase ASH1L [EC:2.1.1.43]
oar_circ_0000091	10	6	2	7.41448	7	8	9	-0.440531	0.635374	0.999963	down	no	NC_019458.2:104072639..104091635:-	Null	.	.	.	.	.	.	.	.	.	.	.	.	.	.	.	.	.	.	.	.	.	.	.	.
oar_circ_0000091	10	6	2	7.41448	7	8	9	-0.440531	0.635374	0.999963	down	no	NC_019458.2:104072639..104091635:-	gene1350	gi|426216789|ref|XP_004002640.1|	13330	0	PREDICTED: histone-lysine N-methyltransferase ASH1L isoform X1 [Ovis aries]	gi|548457200|ref|XM_005677381.1|	11306	0	PREDICTED: Capra hircus ash1 (absent, small, or homeotic)-like (Drosophila) (ASH1L), mRNA	Q9NR48	2222	0	Histone-lysine N-methyltransferase ASH1L	SPAC29B12.02c	151	3e-36	COG2940	pfam00856	SET	SET domain. SET domains are protein lysine methyltransferase enzymes. SET domains appear to be protein-protein interaction domains. It has been demonstrated that SET domains mediate interactions with a family of proteins that display similarity with dual-specificity phosphatases (dsPTPases). A subset of SET domains have been called PR domains. These domains are divergent in sequence from other SE…	GO:0007267|cell-cell signaling;GO:0006323|DNA packaging;GO:0097676|histone H3-K36 dimethylation;GO:0032635|interleukin-6 production;GO:0002674|negative regulation of acute inflammatory response;GO:0043124|negative regulation of I-kappaB kinase/NF-kappaB signaling;GO:0043409|negative regulation of MAPK cascade;GO:0045944|positive regulation of transcription from RNA polymerase II promoter;GO:00063…	GO:0005923|bicellular tight junction;GO:0005694|chromosome;GO:0005737|cytoplasm;GO:0070062|extracellular exosome;GO:0005794|Golgi apparatus;GO:0005654|nucleoplasm;GO:0005634|nucleus;	GO:0003682|chromatin binding;GO:0003677|DNA binding;GO:0046975|histone methyltransferase activity (H3-K36 specific);GO:0042800|histone methyltransferase activity (H3-K4 specific);GO:0008270|zinc ion binding;	K06101	ASH1L; histone-lysine N-methyltransferase ASH1L [EC:2.1.1.43]
oar_circ_0000092	0	6	0	1.85651	0	4	2	-0.287023	0.848096	0.999963	down	no	NC_019458.2:104072639..104110426:-	gene1350	gi|426216789|ref|XP_004002640.1|	13330	0	PREDICTED: histone-lysine N-methyltransferase ASH1L isoform X1 [Ovis aries]	gi|548457200|ref|XM_005677381.1|	11306	0	PREDICTED: Capra hircus ash1 (absent, small, or homeotic)-like (Drosophila) (ASH1L), mRNA	Q9NR48	2222	0	Histone-lysine N-methyltransferase ASH1L	SPAC29B12.02c	151	3e-36	COG2940	pfam00856	SET	SET domain. SET domains are protein lysine methyltransferase enzymes. SET domains appear to be protein-protein interaction domains. It has been demonstrated that SET domains mediate interactions with a family of proteins that display similarity with dual-specificity phosphatases (dsPTPases). A subset of SET domains have been called PR domains. These domains are divergent in sequence from other SE…	GO:0007267|cell-cell signaling;GO:0006323|DNA packaging;GO:0097676|histone H3-K36 dimethylation;GO:0032635|interleukin-6 production;GO:0002674|negative regulation of acute inflammatory response;GO:0043124|negative regulation of I-kappaB kinase/NF-kappaB signaling;GO:0043409|negative regulation of MAPK cascade;GO:0045944|positive regulation of transcription from RNA polymerase II promoter;GO:00063…	GO:0005923|bicellular tight junction;GO:0005694|chromosome;GO:0005737|cytoplasm;GO:0070062|extracellular exosome;GO:0005794|Golgi apparatus;GO:0005654|nucleoplasm;GO:0005634|nucleus;	GO:0003682|chromatin binding;GO:0003677|DNA binding;GO:0046975|histone methyltransferase activity (H3-K36 specific);GO:0042800|histone methyltransferase activity (H3-K4 specific);GO:0008270|zinc ion binding;	K06101	ASH1L; histone-lysine N-methyltransferase ASH1L [EC:2.1.1.43]
oar_circ_0000093	3	4	3	2.57297	6	0	0	0.401102	0.769063	0.999963	up	no	NC_019458.2:104072639..104143185:-	gene1350	gi|426216789|ref|XP_004002640.1|	13330	0	PREDICTED: histone-lysine N-methyltransferase ASH1L isoform X1 [Ovis aries]	gi|548457200|ref|XM_005677381.1|	11306	0	PREDICTED: Capra hircus ash1 (absent, small, or homeotic)-like (Drosophila) (ASH1L), mRNA	Q9NR48	2222	0	Histone-lysine N-methyltransferase ASH1L	SPAC29B12.02c	151	3e-36	COG2940	pfam00856	SET	SET domain. SET domains are protein lysine methyltransferase enzymes. SET domains appear to be protein-protein interaction domains. It has been demonstrated that SET domains mediate interactions with a family of proteins that display similarity with dual-specificity phosphatases (dsPTPases). A subset of SET domains have been called PR domains. These domains are divergent in sequence from other SE…	GO:0007267|cell-cell signaling;GO:0006323|DNA packaging;GO:0097676|histone H3-K36 dimethylation;GO:0032635|interleukin-6 production;GO:0002674|negative regulation of acute inflammatory response;GO:0043124|negative regulation of I-kappaB kinase/NF-kappaB signaling;GO:0043409|negative regulation of MAPK cascade;GO:0045944|positive regulation of transcription from RNA polymerase II promoter;GO:00063…	GO:0005923|bicellular tight junction;GO:0005694|chromosome;GO:0005737|cytoplasm;GO:0070062|extracellular exosome;GO:0005794|Golgi apparatus;GO:0005654|nucleoplasm;GO:0005634|nucleus;	GO:0003682|chromatin binding;GO:0003677|DNA binding;GO:0046975|histone methyltransferase activity (H3-K36 specific);GO:0042800|histone methyltransferase activity (H3-K4 specific);GO:0008270|zinc ion binding;	K06101	ASH1L; histone-lysine N-methyltransferase ASH1L [EC:2.1.1.43]
oar_circ_0000095	0	0	2	0.593552	2	0	0	-0.192847	0.902149	NA	down	no	NC_019458.2:104089367..104110426:-	gene1350	gi|426216789|ref|XP_004002640.1|	13330	0	PREDICTED: histone-lysine N-methyltransferase ASH1L isoform X1 [Ovis aries]	gi|548457200|ref|XM_005677381.1|	11306	0	PREDICTED: Capra hircus ash1 (absent, small, or homeotic)-like (Drosophila) (ASH1L), mRNA	Q9NR48	2222	0	Histone-lysine N-methyltransferase ASH1L	SPAC29B12.02c	151	3e-36	COG2940	pfam00856	SET	SET domain. SET domains are protein lysine methyltransferase enzymes. SET domains appear to be protein-protein interaction domains. It has been demonstrated that SET domains mediate interactions with a family of proteins that display similarity with dual-specificity phosphatases (dsPTPases). A subset of SET domains have been called PR domains. These domains are divergent in sequence from other SE…	GO:0007267|cell-cell signaling;GO:0006323|DNA packaging;GO:0097676|histone H3-K36 dimethylation;GO:0032635|interleukin-6 production;GO:0002674|negative regulation of acute inflammatory response;GO:0043124|negative regulation of I-kappaB kinase/NF-kappaB signaling;GO:0043409|negative regulation of MAPK cascade;GO:0045944|positive regulation of transcription from RNA polymerase II promoter;GO:00063…	GO:0005923|bicellular tight junction;GO:0005694|chromosome;GO:0005737|cytoplasm;GO:0070062|extracellular exosome;GO:0005794|Golgi apparatus;GO:0005654|nucleoplasm;GO:0005634|nucleus;	GO:0003682|chromatin binding;GO:0003677|DNA binding;GO:0046975|histone methyltransferase activity (H3-K36 specific);GO:0042800|histone methyltransferase activity (H3-K4 specific);GO:0008270|zinc ion binding;	K06101	ASH1L; histone-lysine N-methyltransferase ASH1L [EC:2.1.1.43]
oar_circ_0000096	5	9	11	8.74217	6	12	11	-0.482343	0.554776	0.999963	down	no	NC_019458.2:104089367..104143185:-	gene1350	gi|426216789|ref|XP_004002640.1|	13330	0	PREDICTED: histone-lysine N-methyltransferase ASH1L isoform X1 [Ovis aries]	gi|548457200|ref|XM_005677381.1|	11306	0	PREDICTED: Capra hircus ash1 (absent, small, or homeotic)-like (Drosophila) (ASH1L), mRNA	Q9NR48	2222	0	Histone-lysine N-methyltransferase ASH1L	SPAC29B12.02c	151	3e-36	COG2940	pfam00856	SET	SET domain. SET domains are protein lysine methyltransferase enzymes. SET domains appear to be protein-protein interaction domains. It has been demonstrated that SET domains mediate interactions with a family of proteins that display similarity with dual-specificity phosphatases (dsPTPases). A subset of SET domains have been called PR domains. These domains are divergent in sequence from other SE…	GO:0007267|cell-cell signaling;GO:0006323|DNA packaging;GO:0097676|histone H3-K36 dimethylation;GO:0032635|interleukin-6 production;GO:0002674|negative regulation of acute inflammatory response;GO:0043124|negative regulation of I-kappaB kinase/NF-kappaB signaling;GO:0043409|negative regulation of MAPK cascade;GO:0045944|positive regulation of transcription from RNA polymerase II promoter;GO:00063…	GO:0005923|bicellular tight junction;GO:0005694|chromosome;GO:0005737|cytoplasm;GO:0070062|extracellular exosome;GO:0005794|Golgi apparatus;GO:0005654|nucleoplasm;GO:0005634|nucleus;	GO:0003682|chromatin binding;GO:0003677|DNA binding;GO:0046975|histone methyltransferase activity (H3-K36 specific);GO:0042800|histone methyltransferase activity (H3-K4 specific);GO:0008270|zinc ion binding;	K06101	ASH1L; histone-lysine N-methyltransferase ASH1L [EC:2.1.1.43]
oar_circ_0000097	0	2	0	0.259949	0	0	0	1.18697	0.42538	NA	up	no	NC_019458.2:104089367..104157668:-	gene1350	gi|426216789|ref|XP_004002640.1|	13330	0	PREDICTED: histone-lysine N-methyltransferase ASH1L isoform X1 [Ovis aries]	gi|548457200|ref|XM_005677381.1|	11306	0	PREDICTED: Capra hircus ash1 (absent, small, or homeotic)-like (Drosophila) (ASH1L), mRNA	Q9NR48	2222	0	Histone-lysine N-methyltransferase ASH1L	SPAC29B12.02c	151	3e-36	COG2940	pfam00856	SET	SET domain. SET domains are protein lysine methyltransferase enzymes. SET domains appear to be protein-protein interaction domains. It has been demonstrated that SET domains mediate interactions with a family of proteins that display similarity with dual-specificity phosphatases (dsPTPases). A subset of SET domains have been called PR domains. These domains are divergent in sequence from other SE…	GO:0007267|cell-cell signaling;GO:0006323|DNA packaging;GO:0097676|histone H3-K36 dimethylation;GO:0032635|interleukin-6 production;GO:0002674|negative regulation of acute inflammatory response;GO:0043124|negative regulation of I-kappaB kinase/NF-kappaB signaling;GO:0043409|negative regulation of MAPK cascade;GO:0045944|positive regulation of transcription from RNA polymerase II promoter;GO:00063…	GO:0005923|bicellular tight junction;GO:0005694|chromosome;GO:0005737|cytoplasm;GO:0070062|extracellular exosome;GO:0005794|Golgi apparatus;GO:0005654|nucleoplasm;GO:0005634|nucleus;	GO:0003682|chromatin binding;GO:0003677|DNA binding;GO:0046975|histone methyltransferase activity (H3-K36 specific);GO:0042800|histone methyltransferase activity (H3-K4 specific);GO:0008270|zinc ion binding;	K06101	ASH1L; histone-lysine N-methyltransferase ASH1L [EC:2.1.1.43]
oar_circ_0000098	2	5	9	6.28042	3	11	9	-0.795575	0.408185	0.999963	down	no	NC_019458.2:104105863..104143185:-	gene1350	gi|426216789|ref|XP_004002640.1|	13330	0	PREDICTED: histone-lysine N-methyltransferase ASH1L isoform X1 [Ovis aries]	gi|548457200|ref|XM_005677381.1|	11306	0	PREDICTED: Capra hircus ash1 (absent, small, or homeotic)-like (Drosophila) (ASH1L), mRNA	Q9NR48	2222	0	Histone-lysine N-methyltransferase ASH1L	SPAC29B12.02c	151	3e-36	COG2940	pfam00856	SET	SET domain. SET domains are protein lysine methyltransferase enzymes. SET domains appear to be protein-protein interaction domains. It has been demonstrated that SET domains mediate interactions with a family of proteins that display similarity with dual-specificity phosphatases (dsPTPases). A subset of SET domains have been called PR domains. These domains are divergent in sequence from other SE…	GO:0007267|cell-cell signaling;GO:0006323|DNA packaging;GO:0097676|histone H3-K36 dimethylation;GO:0032635|interleukin-6 production;GO:0002674|negative regulation of acute inflammatory response;GO:0043124|negative regulation of I-kappaB kinase/NF-kappaB signaling;GO:0043409|negative regulation of MAPK cascade;GO:0045944|positive regulation of transcription from RNA polymerase II promoter;GO:00063…	GO:0005923|bicellular tight junction;GO:0005694|chromosome;GO:0005737|cytoplasm;GO:0070062|extracellular exosome;GO:0005794|Golgi apparatus;GO:0005654|nucleoplasm;GO:0005634|nucleus;	GO:0003682|chromatin binding;GO:0003677|DNA binding;GO:0046975|histone methyltransferase activity (H3-K36 specific);GO:0042800|histone methyltransferase activity (H3-K4 specific);GO:0008270|zinc ion binding;	K06101	ASH1L; histone-lysine N-methyltransferase ASH1L [EC:2.1.1.43]
oar_circ_0000099	0	0	0	0.361542	0	2	0	-1.3392	0.374749	NA	down	no	NC_019458.2:104105863..104157668:-	gene1350	gi|426216789|ref|XP_004002640.1|	13330	0	PREDICTED: histone-lysine N-methyltransferase ASH1L isoform X1 [Ovis aries]	gi|548457200|ref|XM_005677381.1|	11306	0	PREDICTED: Capra hircus ash1 (absent, small, or homeotic)-like (Drosophila) (ASH1L), mRNA	Q9NR48	2222	0	Histone-lysine N-methyltransferase ASH1L	SPAC29B12.02c	151	3e-36	COG2940	pfam00856	SET	SET domain. SET domains are protein lysine methyltransferase enzymes. SET domains appear to be protein-protein interaction domains. It has been demonstrated that SET domains mediate interactions with a family of proteins that display similarity with dual-specificity phosphatases (dsPTPases). A subset of SET domains have been called PR domains. These domains are divergent in sequence from other SE…	GO:0007267|cell-cell signaling;GO:0006323|DNA packaging;GO:0097676|histone H3-K36 dimethylation;GO:0032635|interleukin-6 production;GO:0002674|negative regulation of acute inflammatory response;GO:0043124|negative regulation of I-kappaB kinase/NF-kappaB signaling;GO:0043409|negative regulation of MAPK cascade;GO:0045944|positive regulation of transcription from RNA polymerase II promoter;GO:00063…	GO:0005923|bicellular tight junction;GO:0005694|chromosome;GO:0005737|cytoplasm;GO:0070062|extracellular exosome;GO:0005794|Golgi apparatus;GO:0005654|nucleoplasm;GO:0005634|nucleus;	GO:0003682|chromatin binding;GO:0003677|DNA binding;GO:0046975|histone methyltransferase activity (H3-K36 specific);GO:0042800|histone methyltransferase activity (H3-K4 specific);GO:0008270|zinc ion binding;	K06101	ASH1L; histone-lysine N-methyltransferase ASH1L [EC:2.1.1.43]
oar_circ_0000100	5	3	0	2.50222	6	0	0	0.307794	0.831481	0.999963	up	no	NC_019458.2:104130406..104143185:-	gene1350	gi|426216789|ref|XP_004002640.1|	13330	0	PREDICTED: histone-lysine N-methyltransferase ASH1L isoform X1 [Ovis aries]	gi|548457200|ref|XM_005677381.1|	11306	0	PREDICTED: Capra hircus ash1 (absent, small, or homeotic)-like (Drosophila) (ASH1L), mRNA	Q9NR48	2222	0	Histone-lysine N-methyltransferase ASH1L	SPAC29B12.02c	151	3e-36	COG2940	pfam00856	SET	SET domain. SET domains are protein lysine methyltransferase enzymes. SET domains appear to be protein-protein interaction domains. It has been demonstrated that SET domains mediate interactions with a family of proteins that display similarity with dual-specificity phosphatases (dsPTPases). A subset of SET domains have been called PR domains. These domains are divergent in sequence from other SE…	GO:0007267|cell-cell signaling;GO:0006323|DNA packaging;GO:0097676|histone H3-K36 dimethylation;GO:0032635|interleukin-6 production;GO:0002674|negative regulation of acute inflammatory response;GO:0043124|negative regulation of I-kappaB kinase/NF-kappaB signaling;GO:0043409|negative regulation of MAPK cascade;GO:0045944|positive regulation of transcription from RNA polymerase II promoter;GO:00063…	GO:0005923|bicellular tight junction;GO:0005694|chromosome;GO:0005737|cytoplasm;GO:0070062|extracellular exosome;GO:0005794|Golgi apparatus;GO:0005654|nucleoplasm;GO:0005634|nucleus;	GO:0003682|chromatin binding;GO:0003677|DNA binding;GO:0046975|histone methyltransferase activity (H3-K36 specific);GO:0042800|histone methyltransferase activity (H3-K4 specific);GO:0008270|zinc ion binding;	K06101	ASH1L; histone-lysine N-methyltransferase ASH1L [EC:2.1.1.43]
oar_circ_0000101	32	30	30	24.7044	19	26	13	0.451146	0.426802	0.999963	up	no	NC_019458.2:104142665..104143185:-	gene1350	gi|426216789|ref|XP_004002640.1|	13330	0	PREDICTED: histone-lysine N-methyltransferase ASH1L isoform X1 [Ovis aries]	gi|548457200|ref|XM_005677381.1|	11306	0	PREDICTED: Capra hircus ash1 (absent, small, or homeotic)-like (Drosophila) (ASH1L), mRNA	Q9NR48	2222	0	Histone-lysine N-methyltransferase ASH1L	SPAC29B12.02c	151	3e-36	COG2940	pfam00856	SET	SET domain. SET domains are protein lysine methyltransferase enzymes. SET domains appear to be protein-protein interaction domains. It has been demonstrated that SET domains mediate interactions with a family of proteins that display similarity with dual-specificity phosphatases (dsPTPases). A subset of SET domains have been called PR domains. These domains are divergent in sequence from other SE…	GO:0007267|cell-cell signaling;GO:0006323|DNA packaging;GO:0097676|histone H3-K36 dimethylation;GO:0032635|interleukin-6 production;GO:0002674|negative regulation of acute inflammatory response;GO:0043124|negative regulation of I-kappaB kinase/NF-kappaB signaling;GO:0043409|negative regulation of MAPK cascade;GO:0045944|positive regulation of transcription from RNA polymerase II promoter;GO:00063…	GO:0005923|bicellular tight junction;GO:0005694|chromosome;GO:0005737|cytoplasm;GO:0070062|extracellular exosome;GO:0005794|Golgi apparatus;GO:0005654|nucleoplasm;GO:0005634|nucleus;	GO:0003682|chromatin binding;GO:0003677|DNA binding;GO:0046975|histone methyltransferase activity (H3-K36 specific);GO:0042800|histone methyltransferase activity (H3-K4 specific);GO:0008270|zinc ion binding;	K06101	ASH1L; histone-lysine N-methyltransferase ASH1L [EC:2.1.1.43]
oar_circ_0000102	18	10	14	14.4538	16	10	17	-0.173013	0.805091	0.999963	down	no	NC_019458.2:104142665..104157668:-	gene1350	gi|426216789|ref|XP_004002640.1|	13330	0	PREDICTED: histone-lysine N-methyltransferase ASH1L isoform X1 [Ovis aries]	gi|548457200|ref|XM_005677381.1|	11306	0	PREDICTED: Capra hircus ash1 (absent, small, or homeotic)-like (Drosophila) (ASH1L), mRNA	Q9NR48	2222	0	Histone-lysine N-methyltransferase ASH1L	SPAC29B12.02c	151	3e-36	COG2940	pfam00856	SET	SET domain. SET domains are protein lysine methyltransferase enzymes. SET domains appear to be protein-protein interaction domains. It has been demonstrated that SET domains mediate interactions with a family of proteins that display similarity with dual-specificity phosphatases (dsPTPases). A subset of SET domains have been called PR domains. These domains are divergent in sequence from other SE…	GO:0007267|cell-cell signaling;GO:0006323|DNA packaging;GO:0097676|histone H3-K36 dimethylation;GO:0032635|interleukin-6 production;GO:0002674|negative regulation of acute inflammatory response;GO:0043124|negative regulation of I-kappaB kinase/NF-kappaB signaling;GO:0043409|negative regulation of MAPK cascade;GO:0045944|positive regulation of transcription from RNA polymerase II promoter;GO:00063…	GO:0005923|bicellular tight junction;GO:0005694|chromosome;GO:0005737|cytoplasm;GO:0070062|extracellular exosome;GO:0005794|Golgi apparatus;GO:0005654|nucleoplasm;GO:0005634|nucleus;	GO:0003682|chromatin binding;GO:0003677|DNA binding;GO:0046975|histone methyltransferase activity (H3-K36 specific);GO:0042800|histone methyltransferase activity (H3-K4 specific);GO:0008270|zinc ion binding;	K06101	ASH1L; histone-lysine N-methyltransferase ASH1L [EC:2.1.1.43]
oar_circ_0000103	0	2	8	2.32363	0	6	0	0.162026	0.911458	0.999963	up	no	NC_019458.2:104197921..104201861:+	gene1355	gi|802989464|ref|XP_012038192.1|	2410	0	PREDICTED: 28S ribosomal protein S29, mitochondrial isoform X2 [Ovis aries]	gi|556759680|ref|XM_005975103.1|	2566	0	PREDICTED: Pantholops hodgsonii death associated protein 3 (DAP3), mRNA	P82922	733	0	28S ribosomal protein S29, mitochondrial	.	.	.	.	pfam10236	DAP3	Mitochondrial ribosomal death-associated protein 3. This is a family of conserved proteins which were originally described as death-associated-protein-3 (DAP-3). The proteins carry a P-loop DNA-binding motif, and induce apoptosis. DAP3 has been shown to be a pro-apoptotic factor in the mitochondrial matrix and to be crucial for mitochondrial biogenesis and so has also been designated as MRP-S29 (…	GO:0006915|apoptotic process;GO:0032543|mitochondrial translation;GO:0070125|mitochondrial translational elongation;GO:0070124|mitochondrial translational initiation;	GO:0005743|mitochondrial inner membrane;GO:0005763|mitochondrial small ribosomal subunit;GO:0005739|mitochondrion;GO:0005654|nucleoplasm;	GO:0044822|poly(A) RNA binding;GO:0003735|structural constituent of ribosome;	.	.
oar_circ_0000104	0	3	4	0.879449	0	0	0	2.17381	0.171943	NA	up	no	NC_019458.2:104212933..104218365:-	Null	.	.	.	.	.	.	.	.	.	.	.	.	.	.	.	.	.	.	.	.	.	.	.	.
oar_circ_0000105	0	0	2	0.593552	2	0	0	-0.192847	0.902149	NA	down	no	NC_019458.2:104213480..104218365:-	Null	.	.	.	.	.	.	.	.	.	.	.	.	.	.	.	.	.	.	.	.	.	.	.	.
oar_circ_0000109	0	0	2	0.244763	0	0	0	1.16974	0.431077	NA	up	no	NC_019458.2:104331824..104336967:-	gene1359	gi|802989652|ref|XP_012038331.1|	4300	0	PREDICTED: LOW QUALITY PROTEIN: YY1-associated protein 1 isoform X1 [Ovis aries]	gi|548457191|ref|XM_005677377.1|	1919	0	PREDICTED: Capra hircus gon-4-like (C. elegans) (GON4L), transcript variant X2, mRNA	Q3T8J9	217	3e-56	GON-4-like protein	.	.	.	.	pfam03154	Atrophin-1	Atrophin-1 family. Atrophin-1 is the protein product of the dentatorubral-pallidoluysian atrophy (DRPLA) gene. DRPLA OMIM:125370 is a progressive neurodegenerative disorder. It is caused by the expansion of a CAG repeat in the DRPLA gene on chromosome 12p. This results in an extended polyglutamine region in atrophin-1, that is thought to confer toxicity to the protein, possibly through altering i…	GO:0030183|B cell differentiation;GO:0045892|negative regulation of transcription, DNA-templated;GO:0006351|transcription, DNA-templated;	GO:0005634|nucleus;	GO:0003677|DNA binding;GO:0003714|transcription corepressor activity;	.	.
oar_circ_0000110	2	0	0	0.426371	0	0	0	1.32953	0.379624	NA	up	no	NC_019458.2:104336881..104346692:-	gene1359	gi|802989652|ref|XP_012038331.1|	4300	0	PREDICTED: LOW QUALITY PROTEIN: YY1-associated protein 1 isoform X1 [Ovis aries]	gi|548457191|ref|XM_005677377.1|	1919	0	PREDICTED: Capra hircus gon-4-like (C. elegans) (GON4L), transcript variant X2, mRNA	Q3T8J9	217	3e-56	GON-4-like protein	.	.	.	.	pfam03154	Atrophin-1	Atrophin-1 family. Atrophin-1 is the protein product of the dentatorubral-pallidoluysian atrophy (DRPLA) gene. DRPLA OMIM:125370 is a progressive neurodegenerative disorder. It is caused by the expansion of a CAG repeat in the DRPLA gene on chromosome 12p. This results in an extended polyglutamine region in atrophin-1, that is thought to confer toxicity to the protein, possibly through altering i…	GO:0030183|B cell differentiation;GO:0045892|negative regulation of transcription, DNA-templated;GO:0006351|transcription, DNA-templated;	GO:0005634|nucleus;	GO:0003677|DNA binding;GO:0003714|transcription corepressor activity;	.	.
oar_circ_0000111	0	4	3	1.95254	3	3	0	-0.158601	0.911424	0.999963	down	no	NC_019458.2:104345986..104346692:-	gene1359	gi|802989652|ref|XP_012038331.1|	4300	0	PREDICTED: LOW QUALITY PROTEIN: YY1-associated protein 1 isoform X1 [Ovis aries]	gi|548457191|ref|XM_005677377.1|	1919	0	PREDICTED: Capra hircus gon-4-like (C. elegans) (GON4L), transcript variant X2, mRNA	Q3T8J9	217	3e-56	GON-4-like protein	.	.	.	.	pfam03154	Atrophin-1	Atrophin-1 family. Atrophin-1 is the protein product of the dentatorubral-pallidoluysian atrophy (DRPLA) gene. DRPLA OMIM:125370 is a progressive neurodegenerative disorder. It is caused by the expansion of a CAG repeat in the DRPLA gene on chromosome 12p. This results in an extended polyglutamine region in atrophin-1, that is thought to confer toxicity to the protein, possibly through altering i…	GO:0030183|B cell differentiation;GO:0045892|negative regulation of transcription, DNA-templated;GO:0006351|transcription, DNA-templated;	GO:0005634|nucleus;	GO:0003677|DNA binding;GO:0003714|transcription corepressor activity;	.	.
oar_circ_0000113	0	2	0	0.259949	0	0	0	1.18697	0.42538	NA	up	no	NC_019458.2:104379999..104382036:+	gene1360	gi|742111390|ref|XP_010836569.1|	2095	0	PREDICTED: synaptotagmin-11 [Bison bison bison]	gi|548457181|ref|XM_005677372.1|	4326	0	PREDICTED: Capra hircus synaptotagmin XI (SYT11), transcript variant X1, mRNA	Q9BT88	763	0	Synaptotagmin-11	.	.	.	.	pfam00168	C2	C2 domain.	GO:0048791|calcium ion-dependent exocytosis of neurotransmitter;GO:1900165|negative regulation of interleukin-6 secretion;GO:0046929|negative regulation of neurotransmitter secretion;GO:0050765|negative regulation of phagocytosis;GO:1900243|negative regulation of synaptic vesicle endocytosis;GO:1904468|negative regulation of tumor necrosis factor secretion;GO:0001778|plasma membrane repair;GO:005…	GO:0030424|axon;GO:0044297|cell body;GO:0030054|cell junction;GO:0043197|dendritic spine;GO:0032009|early phagosome;GO:0060076|excitatory synapse;GO:0060077|inhibitory synapse;GO:0005887|integral component of plasma membrane;GO:0005764|lysosome;GO:0001891|phagocytic cup;GO:0045335|phagocytic vesicle;GO:0005886|plasma membrane;GO:0014069|postsynaptic density;GO:0098793|presynapse;GO:0048787|presyn…	GO:0030276|clathrin binding;GO:0046872|metal ion binding;GO:0042803|protein homodimerization activity;GO:0019905|syntaxin binding;GO:0031625|ubiquitin protein ligase binding;	.	.
oar_circ_0000114	0	8	3	1.94925	0	3	0	0.954933	0.520016	0.999963	up	no	NC_019458.2:10446616..10455847:-	gene152	gi|426215158|ref|XP_004001841.1|	5673	0	PREDICTED: claspin [Ovis aries]	gi|548461569|ref|XM_005678709.1|	5053	0	PREDICTED: Capra hircus claspin (CLSPN), transcript variant X1, mRNA	Q80YR7	1492	0	Claspin	.	.	.	.	pfam03344	Daxx	Daxx Family. The Daxx protein (also known as the Fas-binding protein) is thought to play a role in apoptosis, but precise role played by Daxx remains to be determined. Daxx forms a complex with Axin.	GO:0032147|activation of protein kinase activity;GO:0000077|DNA damage checkpoint;GO:0006281|DNA repair;GO:0000076|DNA replication checkpoint;GO:0031572|G2 DNA damage checkpoint;GO:0033314|mitotic DNA replication checkpoint;GO:0018105|peptidyl-serine phosphorylation;	GO:0005694|chromosome;GO:0005737|cytoplasm;GO:0005654|nucleoplasm;GO:0005634|nucleus;	GO:0010997|anaphase-promoting complex binding;GO:0000217|DNA secondary structure binding;	.	.
oar_circ_0000118	0	0	0	0.353574	0	0	2	-1.33301	0.37664	NA	down	no	NC_019458.2:104917615..104918621:-	Null	.	.	.	.	.	.	.	.	.	.	.	.	.	.	.	.	.	.	.	.	.	.	.	.
oar_circ_0000121	2	7	7	3.26474	2	4	0	0.859715	0.483831	0.999963	up	no	NC_019458.2:10512267..10514075:+	gene153	gi|426218591|ref|XP_004003527.1|	4538	0	PREDICTED: protein argonaute-4 isoform X1 [Ovis aries]	gi|594054735|ref|XM_006051555.1|	5840	0	PREDICTED: Bubalus bubalis argonaute RISC catalytic component 4 (AGO4), transcript variant X1, mRNA	Q9HCK5	1740	0	Protein argonaute-4	.	.	.	.	pfam02171	Piwi	Piwi domain. This domain is found in the protein Piwi and its relatives. The function of this domain is the dsRNA guided hydrolysis of ssRNA. Determination of the crystal structure of Argonaute reveals that PIWI is an RNase H domain, and identifies Argonaute as Slicer, the enzyme that cleaves mRNA in the RNAi RISC complex. In addition, Mg+2 dependence and production of 3'-OH and 5' phosphate prod…	GO:0008584|male gonad development;GO:0007140|male meiosis;GO:0035280|miRNA loading onto RISC involved in gene silencing by miRNA;GO:0035278|negative regulation of translation involved in gene silencing by miRNA;GO:0010586|miRNA metabolic process;GO:0006402|mRNA catabolic process;GO:0043066|negative regulation of apoptotic process;GO:0048015|phosphatidylinositol-mediated signaling;GO:0035194|postt…	GO:0005737|cytoplasm;GO:0000932|cytoplasmic mRNA processing body;GO:0005829|cytosol;GO:0016020|membrane;GO:0035068|micro-ribonucleoprotein complex;GO:0005634|nucleus;GO:0016442|RISC complex;GO:0070578|RISC-loading complex;	GO:0003725|double-stranded RNA binding;GO:0035198|miRNA binding;GO:0003727|single-stranded RNA binding;	K11593	ELF2C, AGO; eukaryotic translation initiation factor 2C
oar_circ_0000122	2	3	5	2.82336	8	0	0	0.0264963	0.984364	0.999963	up	no	NC_019458.2:10516386..10521642:+	gene153	gi|426218591|ref|XP_004003527.1|	4538	0	PREDICTED: protein argonaute-4 isoform X1 [Ovis aries]	gi|594054735|ref|XM_006051555.1|	5840	0	PREDICTED: Bubalus bubalis argonaute RISC catalytic component 4 (AGO4), transcript variant X1, mRNA	Q9HCK5	1740	0	Protein argonaute-4	.	.	.	.	pfam02171	Piwi	Piwi domain. This domain is found in the protein Piwi and its relatives. The function of this domain is the dsRNA guided hydrolysis of ssRNA. Determination of the crystal structure of Argonaute reveals that PIWI is an RNase H domain, and identifies Argonaute as Slicer, the enzyme that cleaves mRNA in the RNAi RISC complex. In addition, Mg+2 dependence and production of 3'-OH and 5' phosphate prod…	GO:0008584|male gonad development;GO:0007140|male meiosis;GO:0035280|miRNA loading onto RISC involved in gene silencing by miRNA;GO:0035278|negative regulation of translation involved in gene silencing by miRNA;GO:0010586|miRNA metabolic process;GO:0006402|mRNA catabolic process;GO:0043066|negative regulation of apoptotic process;GO:0048015|phosphatidylinositol-mediated signaling;GO:0035194|postt…	GO:0005737|cytoplasm;GO:0000932|cytoplasmic mRNA processing body;GO:0005829|cytosol;GO:0016020|membrane;GO:0035068|micro-ribonucleoprotein complex;GO:0005634|nucleus;GO:0016442|RISC complex;GO:0070578|RISC-loading complex;	GO:0003725|double-stranded RNA binding;GO:0035198|miRNA binding;GO:0003727|single-stranded RNA binding;	K11593	ELF2C, AGO; eukaryotic translation initiation factor 2C
oar_circ_0000123	0	2	0	0.957528	4	0	0	-0.696371	0.661916	NA	down	no	NC_019458.2:10527627..10528161:+	gene153	gi|426218591|ref|XP_004003527.1|	4538	0	PREDICTED: protein argonaute-4 isoform X1 [Ovis aries]	gi|594054735|ref|XM_006051555.1|	5840	0	PREDICTED: Bubalus bubalis argonaute RISC catalytic component 4 (AGO4), transcript variant X1, mRNA	Q9HCK5	1740	0	Protein argonaute-4	.	.	.	.	pfam02171	Piwi	Piwi domain. This domain is found in the protein Piwi and its relatives. The function of this domain is the dsRNA guided hydrolysis of ssRNA. Determination of the crystal structure of Argonaute reveals that PIWI is an RNase H domain, and identifies Argonaute as Slicer, the enzyme that cleaves mRNA in the RNAi RISC complex. In addition, Mg+2 dependence and production of 3'-OH and 5' phosphate prod…	GO:0008584|male gonad development;GO:0007140|male meiosis;GO:0035280|miRNA loading onto RISC involved in gene silencing by miRNA;GO:0035278|negative regulation of translation involved in gene silencing by miRNA;GO:0010586|miRNA metabolic process;GO:0006402|mRNA catabolic process;GO:0043066|negative regulation of apoptotic process;GO:0048015|phosphatidylinositol-mediated signaling;GO:0035194|postt…	GO:0005737|cytoplasm;GO:0000932|cytoplasmic mRNA processing body;GO:0005829|cytosol;GO:0016020|membrane;GO:0035068|micro-ribonucleoprotein complex;GO:0005634|nucleus;GO:0016442|RISC complex;GO:0070578|RISC-loading complex;	GO:0003725|double-stranded RNA binding;GO:0035198|miRNA binding;GO:0003727|single-stranded RNA binding;	K11593	ELF2C, AGO; eukaryotic translation initiation factor 2C
oar_circ_0000125	0	0	0	0.353574	0	0	2	-1.33301	0.37664	NA	down	no	NC_019458.2:10583971..10584838:+	gene154	gi|741921828|ref|XP_010801936.1|	4646	0	PREDICTED: protein argonaute-1 isoform X1 [Bos taurus]	gi|594054733|ref|XM_006051554.1|	6951	0	PREDICTED: Bubalus bubalis argonaute RISC catalytic component 1 (AGO1), mRNA	Q8CJG1	1755	0	Protein argonaute-1	.	.	.	.	pfam02171	Piwi	Piwi domain. This domain is found in the protein Piwi and its relatives. The function of this domain is the dsRNA guided hydrolysis of ssRNA. Determination of the crystal structure of Argonaute reveals that PIWI is an RNase H domain, and identifies Argonaute as Slicer, the enzyme that cleaves mRNA in the RNAi RISC complex. In addition, Mg+2 dependence and production of 3'-OH and 5' phosphate prod…	GO:0035280|miRNA loading onto RISC involved in gene silencing by miRNA;GO:0035278|negative regulation of translation involved in gene silencing by miRNA;GO:0010586|miRNA metabolic process;GO:0000956|nuclear-transcribed mRNA catabolic process;GO:0010628|positive regulation of gene expression;GO:1901224|positive regulation of NIK/NF-kappaB signaling;GO:0045944|positive regulation of transcription f…	GO:0005737|cytoplasm;GO:0000932|cytoplasmic mRNA processing body;GO:0005829|cytosol;GO:0030529|ribonucleoprotein complex;GO:0035068|micro-ribonucleoprotein complex;GO:0005634|nucleus;GO:0005844|polysome;GO:0016442|RISC complex;GO:0070578|RISC-loading complex;	GO:0001047|core promoter binding;GO:0003725|double-stranded RNA binding;GO:0035198|miRNA binding;GO:0044822|poly(A) RNA binding;GO:0003723|RNA binding;GO:0000993|RNA polymerase II core binding;GO:0000978|RNA polymerase II core promoter proximal region sequence-specific DNA binding;GO:0003727|single-stranded RNA binding;GO:0044212|transcription regulatory region DNA binding;	K11593	ELF2C, AGO; eukaryotic translation initiation factor 2C
oar_circ_0000126	3	0	11	3.76238	3	4	3	0.137849	0.908754	0.999963	up	no	NC_019458.2:10636833..10660280:+	gene155	gi|395830206|ref|XP_003788225.1|	4646	0	PREDICTED: protein argonaute-3 isoform X1 [Otolemur garnettii]	gi|556733274|ref|XM_005962225.1|	3319	0	PREDICTED: Pantholops hodgsonii argonaute RISC catalytic component 3 (AGO3), transcript variant X1, mRNA	Q9H9G7	101	1e-19	Protein argonaute-3	.	.	.	.	pfam02171	Piwi	Piwi domain. This domain is found in the protein Piwi and its relatives. The function of this domain is the dsRNA guided hydrolysis of ssRNA. Determination of the crystal structure of Argonaute reveals that PIWI is an RNase H domain, and identifies Argonaute as Slicer, the enzyme that cleaves mRNA in the RNAi RISC complex. In addition, Mg+2 dependence and production of 3'-OH and 5' phosphate prod…	GO:0035280|miRNA loading onto RISC involved in gene silencing by miRNA;GO:0035278|negative regulation of translation involved in gene silencing by miRNA;GO:0006402|mRNA catabolic process;GO:0048015|phosphatidylinositol-mediated signaling;GO:0010628|positive regulation of gene expression;GO:1901224|positive regulation of NIK/NF-kappaB signaling;GO:0035194|posttranscriptional gene silencing by RNA;…	GO:0000794|condensed nuclear chromosome;GO:0005737|cytoplasm;GO:0000932|cytoplasmic mRNA processing body;GO:0005829|cytosol;GO:0016020|membrane;GO:0035068|micro-ribonucleoprotein complex;GO:0016442|RISC complex;GO:0070578|RISC-loading complex;	GO:0003725|double-stranded RNA binding;GO:0035198|miRNA binding;GO:0044822|poly(A) RNA binding;GO:0003727|single-stranded RNA binding;	K11593	ELF2C, AGO; eukaryotic translation initiation factor 2C
oar_circ_0000127	7	4	7	3.74562	3	0	2	1.39848	0.240315	0.999963	up	no	NC_019458.2:10648189..10660280:+	gene155	gi|395830206|ref|XP_003788225.1|	4646	0	PREDICTED: protein argonaute-3 isoform X1 [Otolemur garnettii]	gi|556733274|ref|XM_005962225.1|	3319	0	PREDICTED: Pantholops hodgsonii argonaute RISC catalytic component 3 (AGO3), transcript variant X1, mRNA	Q9H9G7	101	1e-19	Protein argonaute-3	.	.	.	.	pfam02171	Piwi	Piwi domain. This domain is found in the protein Piwi and its relatives. The function of this domain is the dsRNA guided hydrolysis of ssRNA. Determination of the crystal structure of Argonaute reveals that PIWI is an RNase H domain, and identifies Argonaute as Slicer, the enzyme that cleaves mRNA in the RNAi RISC complex. In addition, Mg+2 dependence and production of 3'-OH and 5' phosphate prod…	GO:0035280|miRNA loading onto RISC involved in gene silencing by miRNA;GO:0035278|negative regulation of translation involved in gene silencing by miRNA;GO:0006402|mRNA catabolic process;GO:0048015|phosphatidylinositol-mediated signaling;GO:0010628|positive regulation of gene expression;GO:1901224|positive regulation of NIK/NF-kappaB signaling;GO:0035194|posttranscriptional gene silencing by RNA;…	GO:0000794|condensed nuclear chromosome;GO:0005737|cytoplasm;GO:0000932|cytoplasmic mRNA processing body;GO:0005829|cytosol;GO:0016020|membrane;GO:0035068|micro-ribonucleoprotein complex;GO:0016442|RISC complex;GO:0070578|RISC-loading complex;	GO:0003725|double-stranded RNA binding;GO:0035198|miRNA binding;GO:0044822|poly(A) RNA binding;GO:0003727|single-stranded RNA binding;	K11593	ELF2C, AGO; eukaryotic translation initiation factor 2C
oar_circ_0000128	4	0	4	1.69584	0	0	2	1.2242	0.418988	NA	up	no	NC_019458.2:10653291..10660280:+	gene155	gi|395830206|ref|XP_003788225.1|	4646	0	PREDICTED: protein argonaute-3 isoform X1 [Otolemur garnettii]	gi|556733274|ref|XM_005962225.1|	3319	0	PREDICTED: Pantholops hodgsonii argonaute RISC catalytic component 3 (AGO3), transcript variant X1, mRNA	Q9H9G7	101	1e-19	Protein argonaute-3	.	.	.	.	pfam02171	Piwi	Piwi domain. This domain is found in the protein Piwi and its relatives. The function of this domain is the dsRNA guided hydrolysis of ssRNA. Determination of the crystal structure of Argonaute reveals that PIWI is an RNase H domain, and identifies Argonaute as Slicer, the enzyme that cleaves mRNA in the RNAi RISC complex. In addition, Mg+2 dependence and production of 3'-OH and 5' phosphate prod…	GO:0035280|miRNA loading onto RISC involved in gene silencing by miRNA;GO:0035278|negative regulation of translation involved in gene silencing by miRNA;GO:0006402|mRNA catabolic process;GO:0048015|phosphatidylinositol-mediated signaling;GO:0010628|positive regulation of gene expression;GO:1901224|positive regulation of NIK/NF-kappaB signaling;GO:0035194|posttranscriptional gene silencing by RNA;…	GO:0000794|condensed nuclear chromosome;GO:0005737|cytoplasm;GO:0000932|cytoplasmic mRNA processing body;GO:0005829|cytosol;GO:0016020|membrane;GO:0035068|micro-ribonucleoprotein complex;GO:0016442|RISC complex;GO:0070578|RISC-loading complex;	GO:0003725|double-stranded RNA binding;GO:0035198|miRNA binding;GO:0044822|poly(A) RNA binding;GO:0003727|single-stranded RNA binding;	K11593	ELF2C, AGO; eukaryotic translation initiation factor 2C
oar_circ_0000129	0	0	5	0.611906	0	0	0	1.51907	0.323658	NA	up	no	NC_019458.2:106562077..106563708:-	gene1425	gi|802992363|ref|XP_012039279.1|	3812	0	PREDICTED: Fc receptor-like protein 3 isoform X1 [Ovis aries]	gi|594052689|ref|XM_006050592.1|	2242	0	PREDICTED: Bubalus bubalis Fc receptor-like 3 (FCRL3), mRNA	Q96P31	68.6	5e-10	Fc receptor-like protein 3	.	.	.	.	pfam13927	Ig_3	Immunoglobulin domain. This family contains immunoglobulin-like domains.	.	GO:0016021|integral component of membrane;GO:0005886|plasma membrane;	.	K06727	FCRL, IRTA; Fc receptor-like protein
oar_circ_0000130	0	0	4	1.55025	0	0	6	-0.636332	0.683824	NA	down	no	NC_019458.2:10658986..10660280:+	gene155	gi|395830206|ref|XP_003788225.1|	4646	0	PREDICTED: protein argonaute-3 isoform X1 [Otolemur garnettii]	gi|556733274|ref|XM_005962225.1|	3319	0	PREDICTED: Pantholops hodgsonii argonaute RISC catalytic component 3 (AGO3), transcript variant X1, mRNA	Q9H9G7	101	1e-19	Protein argonaute-3	.	.	.	.	pfam02171	Piwi	Piwi domain. This domain is found in the protein Piwi and its relatives. The function of this domain is the dsRNA guided hydrolysis of ssRNA. Determination of the crystal structure of Argonaute reveals that PIWI is an RNase H domain, and identifies Argonaute as Slicer, the enzyme that cleaves mRNA in the RNAi RISC complex. In addition, Mg+2 dependence and production of 3'-OH and 5' phosphate prod…	GO:0035280|miRNA loading onto RISC involved in gene silencing by miRNA;GO:0035278|negative regulation of translation involved in gene silencing by miRNA;GO:0006402|mRNA catabolic process;GO:0048015|phosphatidylinositol-mediated signaling;GO:0010628|positive regulation of gene expression;GO:1901224|positive regulation of NIK/NF-kappaB signaling;GO:0035194|posttranscriptional gene silencing by RNA;…	GO:0000794|condensed nuclear chromosome;GO:0005737|cytoplasm;GO:0000932|cytoplasmic mRNA processing body;GO:0005829|cytosol;GO:0016020|membrane;GO:0035068|micro-ribonucleoprotein complex;GO:0016442|RISC complex;GO:0070578|RISC-loading complex;	GO:0003725|double-stranded RNA binding;GO:0035198|miRNA binding;GO:0044822|poly(A) RNA binding;GO:0003727|single-stranded RNA binding;	K11593	ELF2C, AGO; eukaryotic translation initiation factor 2C
oar_circ_0000132	0	0	4	1.01271	3	0	0	-0.0307148	0.984602	NA	down	no	NC_019458.2:10690051..10710462:+	gene155	gi|395830206|ref|XP_003788225.1|	4646	0	PREDICTED: protein argonaute-3 isoform X1 [Otolemur garnettii]	gi|556733274|ref|XM_005962225.1|	3319	0	PREDICTED: Pantholops hodgsonii argonaute RISC catalytic component 3 (AGO3), transcript variant X1, mRNA	Q9H9G7	101	1e-19	Protein argonaute-3	.	.	.	.	pfam02171	Piwi	Piwi domain. This domain is found in the protein Piwi and its relatives. The function of this domain is the dsRNA guided hydrolysis of ssRNA. Determination of the crystal structure of Argonaute reveals that PIWI is an RNase H domain, and identifies Argonaute as Slicer, the enzyme that cleaves mRNA in the RNAi RISC complex. In addition, Mg+2 dependence and production of 3'-OH and 5' phosphate prod…	GO:0035280|miRNA loading onto RISC involved in gene silencing by miRNA;GO:0035278|negative regulation of translation involved in gene silencing by miRNA;GO:0006402|mRNA catabolic process;GO:0048015|phosphatidylinositol-mediated signaling;GO:0010628|positive regulation of gene expression;GO:1901224|positive regulation of NIK/NF-kappaB signaling;GO:0035194|posttranscriptional gene silencing by RNA;…	GO:0000794|condensed nuclear chromosome;GO:0005737|cytoplasm;GO:0000932|cytoplasmic mRNA processing body;GO:0005829|cytosol;GO:0016020|membrane;GO:0035068|micro-ribonucleoprotein complex;GO:0016442|RISC complex;GO:0070578|RISC-loading complex;	GO:0003725|double-stranded RNA binding;GO:0035198|miRNA binding;GO:0044822|poly(A) RNA binding;GO:0003727|single-stranded RNA binding;	K11593	ELF2C, AGO; eukaryotic translation initiation factor 2C
oar_circ_0000134	4	0	0	0.852741	0	0	0	1.86391	0.237023	NA	up	no	NC_019458.2:10714610..10717902:+	gene155	gi|395830206|ref|XP_003788225.1|	4646	0	PREDICTED: protein argonaute-3 isoform X1 [Otolemur garnettii]	gi|556733274|ref|XM_005962225.1|	3319	0	PREDICTED: Pantholops hodgsonii argonaute RISC catalytic component 3 (AGO3), transcript variant X1, mRNA	Q9H9G7	101	1e-19	Protein argonaute-3	.	.	.	.	pfam02171	Piwi	Piwi domain. This domain is found in the protein Piwi and its relatives. The function of this domain is the dsRNA guided hydrolysis of ssRNA. Determination of the crystal structure of Argonaute reveals that PIWI is an RNase H domain, and identifies Argonaute as Slicer, the enzyme that cleaves mRNA in the RNAi RISC complex. In addition, Mg+2 dependence and production of 3'-OH and 5' phosphate prod…	GO:0035280|miRNA loading onto RISC involved in gene silencing by miRNA;GO:0035278|negative regulation of translation involved in gene silencing by miRNA;GO:0006402|mRNA catabolic process;GO:0048015|phosphatidylinositol-mediated signaling;GO:0010628|positive regulation of gene expression;GO:1901224|positive regulation of NIK/NF-kappaB signaling;GO:0035194|posttranscriptional gene silencing by RNA;…	GO:0000794|condensed nuclear chromosome;GO:0005737|cytoplasm;GO:0000932|cytoplasmic mRNA processing body;GO:0005829|cytosol;GO:0016020|membrane;GO:0035068|micro-ribonucleoprotein complex;GO:0016442|RISC complex;GO:0070578|RISC-loading complex;	GO:0003725|double-stranded RNA binding;GO:0035198|miRNA binding;GO:0044822|poly(A) RNA binding;GO:0003727|single-stranded RNA binding;	K11593	ELF2C, AGO; eukaryotic translation initiation factor 2C
oar_circ_0000136	0	0	2	0.244763	0	0	0	1.16974	0.431077	NA	up	no	NC_019458.2:10822965..10824934:+	gene162	gi|803223311|ref|XP_011971941.1|	1536	0	PREDICTED: MAP7 domain-containing protein 1 isoform X13 [Ovis aries musimon]	gi|545834898|ref|XM_005665229.1|	2448	0	PREDICTED: Sus scrofa MAP7 domain containing 1 (MAP7D1), transcript variant X3, mRNA	Q3KQU3	145	2e-34	MAP7 domain-containing protein 1	.	.	.	.	pfam02476	US2	US2 family. This is a family of unique short (US) region proteins from the herpesvirus strain. The US2 family have no known function.	GO:0000226|microtubule cytoskeleton organization;	GO:0005737|cytoplasm;GO:0015630|microtubule cytoskeleton;GO:0005819|spindle;	GO:0005198|structural molecule activity;	K16806	MAP7D1; MAP7 domain-containing protein 1
oar_circ_0000137	0	0	2	0.244763	0	0	0	1.16974	0.431077	NA	up	no	NC_019458.2:10909040..10911660:+	gene163	gi|426215180|ref|XP_004001852.1|	2759	0	PREDICTED: thyroid hormone receptor-associated protein 3 isoform X1 [Ovis aries]	gi|426215179|ref|XM_004001803.1|	4520	0	PREDICTED: Ovis aries thyroid hormone receptor associated protein 3 (THRAP3), transcript variant X5, mRNA	Q9Y2W1	71.2	7e-11	Thyroid hormone receptor-associated protein 3	.	.	.	.	pfam15440	THRAP3_BCLAF1	THRAP3/BCLAF1 family. This family includes thyroid hormone receptor-associated protein 3 (THRAP3), which is a spliceosome component and a subunit of the TRAP complex which plays a role in pre-mRNA splicing and in mRNA decay. It also includes the transcriptional repressor Bcl-2-associated transcription factor 1 (BCLAF1).	GO:0030521|androgen receptor signaling pathway;GO:0007623|circadian rhythm;GO:0030518|intracellular steroid hormone receptor signaling pathway;GO:0006397|mRNA processing;GO:0048255|mRNA stabilization;GO:0000956|nuclear-transcribed mRNA catabolic process;GO:0042753|positive regulation of circadian rhythm;GO:0048026|positive regulation of mRNA splicing, via spliceosome;GO:0045944|positive regulatio…	GO:0070062|extracellular exosome;GO:0016592|mediator complex;GO:0016607|nuclear speck;GO:0005654|nucleoplasm;GO:0005634|nucleus;	GO:0005524|ATP binding;GO:0001046|core promoter sequence-specific DNA binding;GO:0030374|ligand-dependent nuclear receptor transcription coactivator activity;GO:0051219|phosphoprotein binding;GO:0044822|poly(A) RNA binding;GO:0004872|receptor activity;GO:0001104|RNA polymerase II transcription cofactor activity;GO:0046966|thyroid hormone receptor binding;GO:0003713|transcription coactivator activ…	K13112	THRAP3; thyroid hormone receptor-associated protein 3
oar_circ_0000142	0	0	4	1.01271	3	0	0	-0.0307148	0.984602	NA	down	no	NC_019458.2:110732313..110733749:+	Null	.	.	.	.	.	.	.	.	.	.	.	.	.	.	.	.	.	.	.	.	.	.	.	.
oar_circ_0000147	0	0	0	0.702363	2	0	2	-1.93964	0.219687	NA	down	no	NC_019458.2:111100938..111138410:+	gene1586	gi|802995180|ref|XP_012040410.1|	3159	0	PREDICTED: cyclic AMP-dependent transcription factor ATF-6 alpha isoform X1 [Ovis aries]	gi|548456147|ref|XM_005677141.1|	6758	0	PREDICTED: Capra hircus activating transcription factor 6 (ATF6), mRNA	P18850	1011	0	Cyclic AMP-dependent transcription factor ATF-6 alpha	.	.	.	.	pfam00170	bZIP_1	bZIP transcription factor. The Pfam entry includes the basic region and the leucine zipper region.	GO:0036500|ATF6-mediated unfolded protein response;GO:0030968|endoplasmic reticulum unfolded protein response;GO:0001654|eye development;GO:0043065|positive regulation of apoptotic process;GO:1990440|positive regulation of transcription from RNA polymerase II promoter in response to endoplasmic reticulum stress;GO:0006990|positive regulation of transcription from RNA polymerase II promoter involv…	GO:0005783|endoplasmic reticulum;GO:0005789|endoplasmic reticulum membrane;GO:0005794|Golgi apparatus;GO:0000139|Golgi membrane;GO:0030176|integral component of endoplasmic reticulum membrane;GO:0016020|membrane;GO:0005635|nuclear envelope;GO:0005654|nucleoplasm;GO:0005634|nucleus;	GO:0035497|cAMP response element binding;GO:0046982|protein heterodimerization activity;GO:0000977|RNA polymerase II regulatory region sequence-specific DNA binding;GO:0003713|transcription coactivator activity;GO:0003700|transcription factor activity, sequence-specific DNA binding;GO:0000976|transcription regulatory region sequence-specific DNA binding;	K09054	ATF6A; cyclic AMP-dependent transcription factor ATF-6 alpha
oar_circ_0000148	0	0	0	0.361542	0	2	0	-1.3392	0.374749	NA	down	no	NC_019458.2:111113892..111121994:+	gene1586	gi|802995180|ref|XP_012040410.1|	3159	0	PREDICTED: cyclic AMP-dependent transcription factor ATF-6 alpha isoform X1 [Ovis aries]	gi|548456147|ref|XM_005677141.1|	6758	0	PREDICTED: Capra hircus activating transcription factor 6 (ATF6), mRNA	P18850	1011	0	Cyclic AMP-dependent transcription factor ATF-6 alpha	.	.	.	.	pfam00170	bZIP_1	bZIP transcription factor. The Pfam entry includes the basic region and the leucine zipper region.	GO:0036500|ATF6-mediated unfolded protein response;GO:0030968|endoplasmic reticulum unfolded protein response;GO:0001654|eye development;GO:0043065|positive regulation of apoptotic process;GO:1990440|positive regulation of transcription from RNA polymerase II promoter in response to endoplasmic reticulum stress;GO:0006990|positive regulation of transcription from RNA polymerase II promoter involv…	GO:0005783|endoplasmic reticulum;GO:0005789|endoplasmic reticulum membrane;GO:0005794|Golgi apparatus;GO:0000139|Golgi membrane;GO:0030176|integral component of endoplasmic reticulum membrane;GO:0016020|membrane;GO:0005635|nuclear envelope;GO:0005654|nucleoplasm;GO:0005634|nucleus;	GO:0035497|cAMP response element binding;GO:0046982|protein heterodimerization activity;GO:0000977|RNA polymerase II regulatory region sequence-specific DNA binding;GO:0003713|transcription coactivator activity;GO:0003700|transcription factor activity, sequence-specific DNA binding;GO:0000976|transcription regulatory region sequence-specific DNA binding;	K09054	ATF6A; cyclic AMP-dependent transcription factor ATF-6 alpha
oar_circ_0000149	0	0	2	0.244763	0	0	0	1.16974	0.431077	NA	up	no	NC_019458.2:111113892..111138410:+	gene1586	gi|802995180|ref|XP_012040410.1|	3159	0	PREDICTED: cyclic AMP-dependent transcription factor ATF-6 alpha isoform X1 [Ovis aries]	gi|548456147|ref|XM_005677141.1|	6758	0	PREDICTED: Capra hircus activating transcription factor 6 (ATF6), mRNA	P18850	1011	0	Cyclic AMP-dependent transcription factor ATF-6 alpha	.	.	.	.	pfam00170	bZIP_1	bZIP transcription factor. The Pfam entry includes the basic region and the leucine zipper region.	GO:0036500|ATF6-mediated unfolded protein response;GO:0030968|endoplasmic reticulum unfolded protein response;GO:0001654|eye development;GO:0043065|positive regulation of apoptotic process;GO:1990440|positive regulation of transcription from RNA polymerase II promoter in response to endoplasmic reticulum stress;GO:0006990|positive regulation of transcription from RNA polymerase II promoter involv…	GO:0005783|endoplasmic reticulum;GO:0005789|endoplasmic reticulum membrane;GO:0005794|Golgi apparatus;GO:0000139|Golgi membrane;GO:0030176|integral component of endoplasmic reticulum membrane;GO:0016020|membrane;GO:0005635|nuclear envelope;GO:0005654|nucleoplasm;GO:0005634|nucleus;	GO:0035497|cAMP response element binding;GO:0046982|protein heterodimerization activity;GO:0000977|RNA polymerase II regulatory region sequence-specific DNA binding;GO:0003713|transcription coactivator activity;GO:0003700|transcription factor activity, sequence-specific DNA binding;GO:0000976|transcription regulatory region sequence-specific DNA binding;	K09054	ATF6A; cyclic AMP-dependent transcription factor ATF-6 alpha
oar_circ_0000151	2	0	0	0.426371	0	0	0	1.32953	0.379624	NA	up	no	NC_019458.2:111113892..111175649:+	gene1586	gi|802995180|ref|XP_012040410.1|	3159	0	PREDICTED: cyclic AMP-dependent transcription factor ATF-6 alpha isoform X1 [Ovis aries]	gi|548456147|ref|XM_005677141.1|	6758	0	PREDICTED: Capra hircus activating transcription factor 6 (ATF6), mRNA	P18850	1011	0	Cyclic AMP-dependent transcription factor ATF-6 alpha	.	.	.	.	pfam00170	bZIP_1	bZIP transcription factor. The Pfam entry includes the basic region and the leucine zipper region.	GO:0036500|ATF6-mediated unfolded protein response;GO:0030968|endoplasmic reticulum unfolded protein response;GO:0001654|eye development;GO:0043065|positive regulation of apoptotic process;GO:1990440|positive regulation of transcription from RNA polymerase II promoter in response to endoplasmic reticulum stress;GO:0006990|positive regulation of transcription from RNA polymerase II promoter involv…	GO:0005783|endoplasmic reticulum;GO:0005789|endoplasmic reticulum membrane;GO:0005794|Golgi apparatus;GO:0000139|Golgi membrane;GO:0030176|integral component of endoplasmic reticulum membrane;GO:0016020|membrane;GO:0005635|nuclear envelope;GO:0005654|nucleoplasm;GO:0005634|nucleus;	GO:0035497|cAMP response element binding;GO:0046982|protein heterodimerization activity;GO:0000977|RNA polymerase II regulatory region sequence-specific DNA binding;GO:0003713|transcription coactivator activity;GO:0003700|transcription factor activity, sequence-specific DNA binding;GO:0000976|transcription regulatory region sequence-specific DNA binding;	K09054	ATF6A; cyclic AMP-dependent transcription factor ATF-6 alpha
oar_circ_0000152	0	2	2	0.504712	0	0	0	1.50405	0.329056	NA	up	no	NC_019458.2:111113892..111190542:+	gene1586	gi|802995180|ref|XP_012040410.1|	3159	0	PREDICTED: cyclic AMP-dependent transcription factor ATF-6 alpha isoform X1 [Ovis aries]	gi|548456147|ref|XM_005677141.1|	6758	0	PREDICTED: Capra hircus activating transcription factor 6 (ATF6), mRNA	P18850	1011	0	Cyclic AMP-dependent transcription factor ATF-6 alpha	.	.	.	.	pfam00170	bZIP_1	bZIP transcription factor. The Pfam entry includes the basic region and the leucine zipper region.	GO:0036500|ATF6-mediated unfolded protein response;GO:0030968|endoplasmic reticulum unfolded protein response;GO:0001654|eye development;GO:0043065|positive regulation of apoptotic process;GO:1990440|positive regulation of transcription from RNA polymerase II promoter in response to endoplasmic reticulum stress;GO:0006990|positive regulation of transcription from RNA polymerase II promoter involv…	GO:0005783|endoplasmic reticulum;GO:0005789|endoplasmic reticulum membrane;GO:0005794|Golgi apparatus;GO:0000139|Golgi membrane;GO:0030176|integral component of endoplasmic reticulum membrane;GO:0016020|membrane;GO:0005635|nuclear envelope;GO:0005654|nucleoplasm;GO:0005634|nucleus;	GO:0035497|cAMP response element binding;GO:0046982|protein heterodimerization activity;GO:0000977|RNA polymerase II regulatory region sequence-specific DNA binding;GO:0003713|transcription coactivator activity;GO:0003700|transcription factor activity, sequence-specific DNA binding;GO:0000976|transcription regulatory region sequence-specific DNA binding;	K09054	ATF6A; cyclic AMP-dependent transcription factor ATF-6 alpha
oar_circ_0000154	2	3	2	1.7682	0	0	4	0.403175	0.782082	NA	up	no	NC_019458.2:111121774..111194696:+	gene1586	gi|802995180|ref|XP_012040410.1|	3159	0	PREDICTED: cyclic AMP-dependent transcription factor ATF-6 alpha isoform X1 [Ovis aries]	gi|548456147|ref|XM_005677141.1|	6758	0	PREDICTED: Capra hircus activating transcription factor 6 (ATF6), mRNA	P18850	1011	0	Cyclic AMP-dependent transcription factor ATF-6 alpha	.	.	.	.	pfam00170	bZIP_1	bZIP transcription factor. The Pfam entry includes the basic region and the leucine zipper region.	GO:0036500|ATF6-mediated unfolded protein response;GO:0030968|endoplasmic reticulum unfolded protein response;GO:0001654|eye development;GO:0043065|positive regulation of apoptotic process;GO:1990440|positive regulation of transcription from RNA polymerase II promoter in response to endoplasmic reticulum stress;GO:0006990|positive regulation of transcription from RNA polymerase II promoter involv…	GO:0005783|endoplasmic reticulum;GO:0005789|endoplasmic reticulum membrane;GO:0005794|Golgi apparatus;GO:0000139|Golgi membrane;GO:0030176|integral component of endoplasmic reticulum membrane;GO:0016020|membrane;GO:0005635|nuclear envelope;GO:0005654|nucleoplasm;GO:0005634|nucleus;	GO:0035497|cAMP response element binding;GO:0046982|protein heterodimerization activity;GO:0000977|RNA polymerase II regulatory region sequence-specific DNA binding;GO:0003713|transcription coactivator activity;GO:0003700|transcription factor activity, sequence-specific DNA binding;GO:0000976|transcription regulatory region sequence-specific DNA binding;	K09054	ATF6A; cyclic AMP-dependent transcription factor ATF-6 alpha
oar_circ_0000155	0	2	0	0.259949	0	0	0	1.18697	0.42538	NA	up	no	NC_019458.2:111127081..111194696:+	gene1586	gi|802995180|ref|XP_012040410.1|	3159	0	PREDICTED: cyclic AMP-dependent transcription factor ATF-6 alpha isoform X1 [Ovis aries]	gi|548456147|ref|XM_005677141.1|	6758	0	PREDICTED: Capra hircus activating transcription factor 6 (ATF6), mRNA	P18850	1011	0	Cyclic AMP-dependent transcription factor ATF-6 alpha	.	.	.	.	pfam00170	bZIP_1	bZIP transcription factor. The Pfam entry includes the basic region and the leucine zipper region.	GO:0036500|ATF6-mediated unfolded protein response;GO:0030968|endoplasmic reticulum unfolded protein response;GO:0001654|eye development;GO:0043065|positive regulation of apoptotic process;GO:1990440|positive regulation of transcription from RNA polymerase II promoter in response to endoplasmic reticulum stress;GO:0006990|positive regulation of transcription from RNA polymerase II promoter involv…	GO:0005783|endoplasmic reticulum;GO:0005789|endoplasmic reticulum membrane;GO:0005794|Golgi apparatus;GO:0000139|Golgi membrane;GO:0030176|integral component of endoplasmic reticulum membrane;GO:0016020|membrane;GO:0005635|nuclear envelope;GO:0005654|nucleoplasm;GO:0005634|nucleus;	GO:0035497|cAMP response element binding;GO:0046982|protein heterodimerization activity;GO:0000977|RNA polymerase II regulatory region sequence-specific DNA binding;GO:0003713|transcription coactivator activity;GO:0003700|transcription factor activity, sequence-specific DNA binding;GO:0000976|transcription regulatory region sequence-specific DNA binding;	K09054	ATF6A; cyclic AMP-dependent transcription factor ATF-6 alpha
oar_circ_0000156	0	0	0	1.42066	4	4	0	-2.90885	0.0656476	NA	down	no	NC_019458.2:111137110..111138410:+	gene1586	gi|802995180|ref|XP_012040410.1|	3159	0	PREDICTED: cyclic AMP-dependent transcription factor ATF-6 alpha isoform X1 [Ovis aries]	gi|548456147|ref|XM_005677141.1|	6758	0	PREDICTED: Capra hircus activating transcription factor 6 (ATF6), mRNA	P18850	1011	0	Cyclic AMP-dependent transcription factor ATF-6 alpha	.	.	.	.	pfam00170	bZIP_1	bZIP transcription factor. The Pfam entry includes the basic region and the leucine zipper region.	GO:0036500|ATF6-mediated unfolded protein response;GO:0030968|endoplasmic reticulum unfolded protein response;GO:0001654|eye development;GO:0043065|positive regulation of apoptotic process;GO:1990440|positive regulation of transcription from RNA polymerase II promoter in response to endoplasmic reticulum stress;GO:0006990|positive regulation of transcription from RNA polymerase II promoter involv…	GO:0005783|endoplasmic reticulum;GO:0005789|endoplasmic reticulum membrane;GO:0005794|Golgi apparatus;GO:0000139|Golgi membrane;GO:0030176|integral component of endoplasmic reticulum membrane;GO:0016020|membrane;GO:0005635|nuclear envelope;GO:0005654|nucleoplasm;GO:0005634|nucleus;	GO:0035497|cAMP response element binding;GO:0046982|protein heterodimerization activity;GO:0000977|RNA polymerase II regulatory region sequence-specific DNA binding;GO:0003713|transcription coactivator activity;GO:0003700|transcription factor activity, sequence-specific DNA binding;GO:0000976|transcription regulatory region sequence-specific DNA binding;	K09054	ATF6A; cyclic AMP-dependent transcription factor ATF-6 alpha
oar_circ_0000158	8	9	9	8.45452	4	17	4	-0.166741	0.849974	0.999963	down	no	NC_019458.2:111137110..111175649:+	gene1586	gi|802995180|ref|XP_012040410.1|	3159	0	PREDICTED: cyclic AMP-dependent transcription factor ATF-6 alpha isoform X1 [Ovis aries]	gi|548456147|ref|XM_005677141.1|	6758	0	PREDICTED: Capra hircus activating transcription factor 6 (ATF6), mRNA	P18850	1011	0	Cyclic AMP-dependent transcription factor ATF-6 alpha	.	.	.	.	pfam00170	bZIP_1	bZIP transcription factor. The Pfam entry includes the basic region and the leucine zipper region.	GO:0036500|ATF6-mediated unfolded protein response;GO:0030968|endoplasmic reticulum unfolded protein response;GO:0001654|eye development;GO:0043065|positive regulation of apoptotic process;GO:1990440|positive regulation of transcription from RNA polymerase II promoter in response to endoplasmic reticulum stress;GO:0006990|positive regulation of transcription from RNA polymerase II promoter involv…	GO:0005783|endoplasmic reticulum;GO:0005789|endoplasmic reticulum membrane;GO:0005794|Golgi apparatus;GO:0000139|Golgi membrane;GO:0030176|integral component of endoplasmic reticulum membrane;GO:0016020|membrane;GO:0005635|nuclear envelope;GO:0005654|nucleoplasm;GO:0005634|nucleus;	GO:0035497|cAMP response element binding;GO:0046982|protein heterodimerization activity;GO:0000977|RNA polymerase II regulatory region sequence-specific DNA binding;GO:0003713|transcription coactivator activity;GO:0003700|transcription factor activity, sequence-specific DNA binding;GO:0000976|transcription regulatory region sequence-specific DNA binding;	K09054	ATF6A; cyclic AMP-dependent transcription factor ATF-6 alpha
oar_circ_0000159	10	19	11	11.8198	9	15	9	0.0137738	0.984982	0.999963	up	no	NC_019458.2:111137110..111194696:+	gene1586	gi|802995180|ref|XP_012040410.1|	3159	0	PREDICTED: cyclic AMP-dependent transcription factor ATF-6 alpha isoform X1 [Ovis aries]	gi|548456147|ref|XM_005677141.1|	6758	0	PREDICTED: Capra hircus activating transcription factor 6 (ATF6), mRNA	P18850	1011	0	Cyclic AMP-dependent transcription factor ATF-6 alpha	.	.	.	.	pfam00170	bZIP_1	bZIP transcription factor. The Pfam entry includes the basic region and the leucine zipper region.	GO:0036500|ATF6-mediated unfolded protein response;GO:0030968|endoplasmic reticulum unfolded protein response;GO:0001654|eye development;GO:0043065|positive regulation of apoptotic process;GO:1990440|positive regulation of transcription from RNA polymerase II promoter in response to endoplasmic reticulum stress;GO:0006990|positive regulation of transcription from RNA polymerase II promoter involv…	GO:0005783|endoplasmic reticulum;GO:0005789|endoplasmic reticulum membrane;GO:0005794|Golgi apparatus;GO:0000139|Golgi membrane;GO:0030176|integral component of endoplasmic reticulum membrane;GO:0016020|membrane;GO:0005635|nuclear envelope;GO:0005654|nucleoplasm;GO:0005634|nucleus;	GO:0035497|cAMP response element binding;GO:0046982|protein heterodimerization activity;GO:0000977|RNA polymerase II regulatory region sequence-specific DNA binding;GO:0003713|transcription coactivator activity;GO:0003700|transcription factor activity, sequence-specific DNA binding;GO:0000976|transcription regulatory region sequence-specific DNA binding;	K09054	ATF6A; cyclic AMP-dependent transcription factor ATF-6 alpha
oar_circ_0000162	8	24	27	14.1335	16	8	10	0.428779	0.534692	0.999963	up	no	NC_019458.2:111167586..111175649:+	gene1586	gi|802995180|ref|XP_012040410.1|	3159	0	PREDICTED: cyclic AMP-dependent transcription factor ATF-6 alpha isoform X1 [Ovis aries]	gi|548456147|ref|XM_005677141.1|	6758	0	PREDICTED: Capra hircus activating transcription factor 6 (ATF6), mRNA	P18850	1011	0	Cyclic AMP-dependent transcription factor ATF-6 alpha	.	.	.	.	pfam00170	bZIP_1	bZIP transcription factor. The Pfam entry includes the basic region and the leucine zipper region.	GO:0036500|ATF6-mediated unfolded protein response;GO:0030968|endoplasmic reticulum unfolded protein response;GO:0001654|eye development;GO:0043065|positive regulation of apoptotic process;GO:1990440|positive regulation of transcription from RNA polymerase II promoter in response to endoplasmic reticulum stress;GO:0006990|positive regulation of transcription from RNA polymerase II promoter involv…	GO:0005783|endoplasmic reticulum;GO:0005789|endoplasmic reticulum membrane;GO:0005794|Golgi apparatus;GO:0000139|Golgi membrane;GO:0030176|integral component of endoplasmic reticulum membrane;GO:0016020|membrane;GO:0005635|nuclear envelope;GO:0005654|nucleoplasm;GO:0005634|nucleus;	GO:0035497|cAMP response element binding;GO:0046982|protein heterodimerization activity;GO:0000977|RNA polymerase II regulatory region sequence-specific DNA binding;GO:0003713|transcription coactivator activity;GO:0003700|transcription factor activity, sequence-specific DNA binding;GO:0000976|transcription regulatory region sequence-specific DNA binding;	K09054	ATF6A; cyclic AMP-dependent transcription factor ATF-6 alpha
oar_circ_0000163	4	7	4	4.92301	2	6	7	-0.223886	0.827279	0.999963	down	no	NC_019458.2:111167586..111190542:+	gene1586	gi|802995180|ref|XP_012040410.1|	3159	0	PREDICTED: cyclic AMP-dependent transcription factor ATF-6 alpha isoform X1 [Ovis aries]	gi|548456147|ref|XM_005677141.1|	6758	0	PREDICTED: Capra hircus activating transcription factor 6 (ATF6), mRNA	P18850	1011	0	Cyclic AMP-dependent transcription factor ATF-6 alpha	.	.	.	.	pfam00170	bZIP_1	bZIP transcription factor. The Pfam entry includes the basic region and the leucine zipper region.	GO:0036500|ATF6-mediated unfolded protein response;GO:0030968|endoplasmic reticulum unfolded protein response;GO:0001654|eye development;GO:0043065|positive regulation of apoptotic process;GO:1990440|positive regulation of transcription from RNA polymerase II promoter in response to endoplasmic reticulum stress;GO:0006990|positive regulation of transcription from RNA polymerase II promoter involv…	GO:0005783|endoplasmic reticulum;GO:0005789|endoplasmic reticulum membrane;GO:0005794|Golgi apparatus;GO:0000139|Golgi membrane;GO:0030176|integral component of endoplasmic reticulum membrane;GO:0016020|membrane;GO:0005635|nuclear envelope;GO:0005654|nucleoplasm;GO:0005634|nucleus;	GO:0035497|cAMP response element binding;GO:0046982|protein heterodimerization activity;GO:0000977|RNA polymerase II regulatory region sequence-specific DNA binding;GO:0003713|transcription coactivator activity;GO:0003700|transcription factor activity, sequence-specific DNA binding;GO:0000976|transcription regulatory region sequence-specific DNA binding;	K09054	ATF6A; cyclic AMP-dependent transcription factor ATF-6 alpha
oar_circ_0000164	5	8	5	4.3095	3	2	4	0.663927	0.532338	0.999963	up	no	NC_019458.2:111167586..111194696:+	gene1586	gi|802995180|ref|XP_012040410.1|	3159	0	PREDICTED: cyclic AMP-dependent transcription factor ATF-6 alpha isoform X1 [Ovis aries]	gi|548456147|ref|XM_005677141.1|	6758	0	PREDICTED: Capra hircus activating transcription factor 6 (ATF6), mRNA	P18850	1011	0	Cyclic AMP-dependent transcription factor ATF-6 alpha	.	.	.	.	pfam00170	bZIP_1	bZIP transcription factor. The Pfam entry includes the basic region and the leucine zipper region.	GO:0036500|ATF6-mediated unfolded protein response;GO:0030968|endoplasmic reticulum unfolded protein response;GO:0001654|eye development;GO:0043065|positive regulation of apoptotic process;GO:1990440|positive regulation of transcription from RNA polymerase II promoter in response to endoplasmic reticulum stress;GO:0006990|positive regulation of transcription from RNA polymerase II promoter involv…	GO:0005783|endoplasmic reticulum;GO:0005789|endoplasmic reticulum membrane;GO:0005794|Golgi apparatus;GO:0000139|Golgi membrane;GO:0030176|integral component of endoplasmic reticulum membrane;GO:0016020|membrane;GO:0005635|nuclear envelope;GO:0005654|nucleoplasm;GO:0005634|nucleus;	GO:0035497|cAMP response element binding;GO:0046982|protein heterodimerization activity;GO:0000977|RNA polymerase II regulatory region sequence-specific DNA binding;GO:0003713|transcription coactivator activity;GO:0003700|transcription factor activity, sequence-specific DNA binding;GO:0000976|transcription regulatory region sequence-specific DNA binding;	K09054	ATF6A; cyclic AMP-dependent transcription factor ATF-6 alpha
oar_circ_0000165	0	0	3	0.890328	3	0	0	-0.232424	0.883975	NA	down	no	NC_019458.2:111167586..111258472:+	gene1586	gi|802995180|ref|XP_012040410.1|	3159	0	PREDICTED: cyclic AMP-dependent transcription factor ATF-6 alpha isoform X1 [Ovis aries]	gi|548456147|ref|XM_005677141.1|	6758	0	PREDICTED: Capra hircus activating transcription factor 6 (ATF6), mRNA	P18850	1011	0	Cyclic AMP-dependent transcription factor ATF-6 alpha	.	.	.	.	pfam00170	bZIP_1	bZIP transcription factor. The Pfam entry includes the basic region and the leucine zipper region.	GO:0036500|ATF6-mediated unfolded protein response;GO:0030968|endoplasmic reticulum unfolded protein response;GO:0001654|eye development;GO:0043065|positive regulation of apoptotic process;GO:1990440|positive regulation of transcription from RNA polymerase II promoter in response to endoplasmic reticulum stress;GO:0006990|positive regulation of transcription from RNA polymerase II promoter involv…	GO:0005783|endoplasmic reticulum;GO:0005789|endoplasmic reticulum membrane;GO:0005794|Golgi apparatus;GO:0000139|Golgi membrane;GO:0030176|integral component of endoplasmic reticulum membrane;GO:0016020|membrane;GO:0005635|nuclear envelope;GO:0005654|nucleoplasm;GO:0005634|nucleus;	GO:0035497|cAMP response element binding;GO:0046982|protein heterodimerization activity;GO:0000977|RNA polymerase II regulatory region sequence-specific DNA binding;GO:0003713|transcription coactivator activity;GO:0003700|transcription factor activity, sequence-specific DNA binding;GO:0000976|transcription regulatory region sequence-specific DNA binding;	K09054	ATF6A; cyclic AMP-dependent transcription factor ATF-6 alpha
oar_circ_0000166	3	4	11	4.26395	4	0	6	0.439648	0.701678	0.999963	up	no	NC_019458.2:111174341..111194696:+	gene1586	gi|802995180|ref|XP_012040410.1|	3159	0	PREDICTED: cyclic AMP-dependent transcription factor ATF-6 alpha isoform X1 [Ovis aries]	gi|548456147|ref|XM_005677141.1|	6758	0	PREDICTED: Capra hircus activating transcription factor 6 (ATF6), mRNA	P18850	1011	0	Cyclic AMP-dependent transcription factor ATF-6 alpha	.	.	.	.	pfam00170	bZIP_1	bZIP transcription factor. The Pfam entry includes the basic region and the leucine zipper region.	GO:0036500|ATF6-mediated unfolded protein response;GO:0030968|endoplasmic reticulum unfolded protein response;GO:0001654|eye development;GO:0043065|positive regulation of apoptotic process;GO:1990440|positive regulation of transcription from RNA polymerase II promoter in response to endoplasmic reticulum stress;GO:0006990|positive regulation of transcription from RNA polymerase II promoter involv…	GO:0005783|endoplasmic reticulum;GO:0005789|endoplasmic reticulum membrane;GO:0005794|Golgi apparatus;GO:0000139|Golgi membrane;GO:0030176|integral component of endoplasmic reticulum membrane;GO:0016020|membrane;GO:0005635|nuclear envelope;GO:0005654|nucleoplasm;GO:0005634|nucleus;	GO:0035497|cAMP response element binding;GO:0046982|protein heterodimerization activity;GO:0000977|RNA polymerase II regulatory region sequence-specific DNA binding;GO:0003713|transcription coactivator activity;GO:0003700|transcription factor activity, sequence-specific DNA binding;GO:0000976|transcription regulatory region sequence-specific DNA binding;	K09054	ATF6A; cyclic AMP-dependent transcription factor ATF-6 alpha
oar_circ_0000168	0	0	4	1.72304	5	2	0	-0.839126	0.578124	NA	down	no	NC_019458.2:111713370..111768698:+	gene1589	gi|593727822|ref|XP_007109829.1|	3017	0	PREDICTED: carboxyl-terminal PDZ ligand of neuronal nitric oxide synthase protein isoform X1 [Physeter catodon]	gi|594060928|ref|XM_006054495.1|	4079	0	PREDICTED: Bubalus bubalis carboxyl-terminal PDZ ligand of neuronal nitric oxide synthase protein-like (LOC102414663), transcript variant X1, mRNA	A4IFJ0	405	3e-129	Uncharacterized protein C1orf226 homolog	.	.	.	.	pfam15429	DUF4628	Domain of unknown function (DUF4628). This family of proteins is found in eukaryotes. Proteins in this family are typically between 152 and 673 amino acids in length.	GO:0030198|extracellular matrix organization;	GO:0005578|proteinaceous extracellular matrix;	GO:0050840|extracellular matrix binding;	K16513	NOS1AP, CAPON; carboxyl-terminal PDZ ligand of neuronal nitric oxide synthase protein
oar_circ_0000169	0	8	0	1.0398	0	0	0	2.15164	0.175885	NA	up	no	NC_019458.2:111725061..111768698:+	gene1589	gi|593727822|ref|XP_007109829.1|	3017	0	PREDICTED: carboxyl-terminal PDZ ligand of neuronal nitric oxide synthase protein isoform X1 [Physeter catodon]	gi|594060928|ref|XM_006054495.1|	4079	0	PREDICTED: Bubalus bubalis carboxyl-terminal PDZ ligand of neuronal nitric oxide synthase protein-like (LOC102414663), transcript variant X1, mRNA	A4IFJ0	405	3e-129	Uncharacterized protein C1orf226 homolog	.	.	.	.	pfam15429	DUF4628	Domain of unknown function (DUF4628). This family of proteins is found in eukaryotes. Proteins in this family are typically between 152 and 673 amino acids in length.	GO:0030198|extracellular matrix organization;	GO:0005578|proteinaceous extracellular matrix;	GO:0050840|extracellular matrix binding;	K16513	NOS1AP, CAPON; carboxyl-terminal PDZ ligand of neuronal nitric oxide synthase protein
oar_circ_0000171	0	0	2	0.244763	0	0	0	1.16974	0.431077	NA	up	no	NC_019458.2:111756308..111801453:+	gene1589	gi|593727822|ref|XP_007109829.1|	3017	0	PREDICTED: carboxyl-terminal PDZ ligand of neuronal nitric oxide synthase protein isoform X1 [Physeter catodon]	gi|594060928|ref|XM_006054495.1|	4079	0	PREDICTED: Bubalus bubalis carboxyl-terminal PDZ ligand of neuronal nitric oxide synthase protein-like (LOC102414663), transcript variant X1, mRNA	A4IFJ0	405	3e-129	Uncharacterized protein C1orf226 homolog	.	.	.	.	pfam15429	DUF4628	Domain of unknown function (DUF4628). This family of proteins is found in eukaryotes. Proteins in this family are typically between 152 and 673 amino acids in length.	GO:0030198|extracellular matrix organization;	GO:0005578|proteinaceous extracellular matrix;	GO:0050840|extracellular matrix binding;	K16513	NOS1AP, CAPON; carboxyl-terminal PDZ ligand of neuronal nitric oxide synthase protein
oar_circ_0000175	0	12	34	7.67407	3	4	4	1.38783	0.178688	0.999963	up	no	NC_019458.2:112005543..112031151:+	gene1597	gi|594636689|ref|XP_007171736.1|	2841	0	PREDICTED: UDP-N-acetylhexosamine pyrophosphorylase isoform X1 [Balaenoptera acutorostrata scammoni]	gi|594060911|ref|XM_006054488.1|	2087	0	PREDICTED: Bubalus bubalis UDP-N-acteylglucosamine pyrophosphorylase 1 (UAP1), transcript variant X1, mRNA	Q16222	1009	0	UDP-N-acetylhexosamine pyrophosphorylase	YDL103c	337	8e-106	COG4284	pfam01704	UDPGP	UTP--glucose-1-phosphate uridylyltransferase. This family consists of UTP--glucose-1-phosphate uridylyltransferases, EC:2.7.7.9. Also known as UDP-glucose pyrophosphorylase (UDPGP) and Glucose-1-phosphate uridylyltransferase. UTP--glucose-1-phosphate uridylyltransferase catalyses the interconversion of MgUTP + glucose-1-phosphate and UDP-glucose + MgPPi. UDP-glucose is an important intermediate i…	GO:0006048|UDP-N-acetylglucosamine biosynthetic process;	GO:0005737|cytoplasm;GO:0005829|cytosol;GO:0005654|nucleoplasm;GO:0005886|plasma membrane;	GO:0030246|carbohydrate binding;GO:0003977|UDP-N-acetylglucosamine diphosphorylase activity;	K00972	UAP1; UDP-N-acetylglucosamine/UDP-N-acetylgalactosamine diphosphorylase [EC:2.7.7.23 2.7.7.83]
oar_circ_0000176	2	0	0	0.426371	0	0	0	1.32953	0.379624	NA	up	no	NC_019458.2:112005543..112032265:+	gene1597	gi|594636689|ref|XP_007171736.1|	2841	0	PREDICTED: UDP-N-acetylhexosamine pyrophosphorylase isoform X1 [Balaenoptera acutorostrata scammoni]	gi|594060911|ref|XM_006054488.1|	2087	0	PREDICTED: Bubalus bubalis UDP-N-acteylglucosamine pyrophosphorylase 1 (UAP1), transcript variant X1, mRNA	Q16222	1009	0	UDP-N-acetylhexosamine pyrophosphorylase	YDL103c	337	8e-106	COG4284	pfam01704	UDPGP	UTP--glucose-1-phosphate uridylyltransferase. This family consists of UTP--glucose-1-phosphate uridylyltransferases, EC:2.7.7.9. Also known as UDP-glucose pyrophosphorylase (UDPGP) and Glucose-1-phosphate uridylyltransferase. UTP--glucose-1-phosphate uridylyltransferase catalyses the interconversion of MgUTP + glucose-1-phosphate and UDP-glucose + MgPPi. UDP-glucose is an important intermediate i…	GO:0006048|UDP-N-acetylglucosamine biosynthetic process;	GO:0005737|cytoplasm;GO:0005829|cytosol;GO:0005654|nucleoplasm;GO:0005886|plasma membrane;	GO:0030246|carbohydrate binding;GO:0003977|UDP-N-acetylglucosamine diphosphorylase activity;	K00972	UAP1; UDP-N-acetylglucosamine/UDP-N-acetylgalactosamine diphosphorylase [EC:2.7.7.23 2.7.7.83]
oar_circ_0000177	0	0	2	0.244763	0	0	0	1.16974	0.431077	NA	up	no	NC_019458.2:112014467..112026185:+	gene1597	gi|594636689|ref|XP_007171736.1|	2841	0	PREDICTED: UDP-N-acetylhexosamine pyrophosphorylase isoform X1 [Balaenoptera acutorostrata scammoni]	gi|594060911|ref|XM_006054488.1|	2087	0	PREDICTED: Bubalus bubalis UDP-N-acteylglucosamine pyrophosphorylase 1 (UAP1), transcript variant X1, mRNA	Q16222	1009	0	UDP-N-acetylhexosamine pyrophosphorylase	YDL103c	337	8e-106	COG4284	pfam01704	UDPGP	UTP--glucose-1-phosphate uridylyltransferase. This family consists of UTP--glucose-1-phosphate uridylyltransferases, EC:2.7.7.9. Also known as UDP-glucose pyrophosphorylase (UDPGP) and Glucose-1-phosphate uridylyltransferase. UTP--glucose-1-phosphate uridylyltransferase catalyses the interconversion of MgUTP + glucose-1-phosphate and UDP-glucose + MgPPi. UDP-glucose is an important intermediate i…	GO:0006048|UDP-N-acetylglucosamine biosynthetic process;	GO:0005737|cytoplasm;GO:0005829|cytosol;GO:0005654|nucleoplasm;GO:0005886|plasma membrane;	GO:0030246|carbohydrate binding;GO:0003977|UDP-N-acetylglucosamine diphosphorylase activity;	K00972	UAP1; UDP-N-acetylglucosamine/UDP-N-acetylgalactosamine diphosphorylase [EC:2.7.7.23 2.7.7.83]
oar_circ_0000178	0	0	2	1.14065	0	3	2	-1.04035	0.507114	NA	down	no	NC_019458.2:11206010..11212623:+	Null	.	.	.	.	.	.	.	.	.	.	.	.	.	.	.	.	.	.	.	.	.	.	.	.
oar_circ_0000179	0	0	3	0.367144	0	0	0	1.3119	0.385146	NA	up	no	NC_019458.2:112217595..112220728:+	gene1598	gi|528941827|ref|XP_005203575.1|	4346	0	PREDICTED: discoidin domain-containing receptor 2 isoform X2 [Bos taurus]	gi|594106273|ref|XM_006076005.1|	3876	0	PREDICTED: Bubalus bubalis discoidin domain receptor tyrosine kinase 2 (DDR2), transcript variant X1, mRNA	Q16832	1610	0	Discoidin domain-containing receptor 2	.	.	.	.	pfam07714	Pkinase_Tyr	Protein tyrosine kinase.	GO:0031214|biomineral tissue development;GO:0007155|cell adhesion;GO:0035988|chondrocyte proliferation;GO:0030199|collagen fibril organization;GO:0038063|collagen-activated tyrosine kinase receptor signaling pathway;GO:0003416|endochondral bone growth;GO:0030198|extracellular matrix organization;GO:0001503|ossification;GO:0018108|peptidyl-tyrosine phosphorylation;GO:0090091|positive regulation of…	GO:0016324|apical plasma membrane;GO:0070062|extracellular exosome;GO:0005925|focal adhesion;GO:0005887|integral component of plasma membrane;GO:0005886|plasma membrane;	GO:0005524|ATP binding;GO:0005518|collagen binding;GO:0038062|protein tyrosine kinase collagen receptor activity;GO:0004714|transmembrane receptor protein tyrosine kinase activity;	K05125	DDR2, TKT; discoidin domain receptor family member 2 [EC:2.7.10.1]
oar_circ_0000180	0	0	0	0.348789	2	0	0	-1.32922	0.377798	NA	down	no	NC_019458.2:112219544..112220728:+	gene1598	gi|528941827|ref|XP_005203575.1|	4346	0	PREDICTED: discoidin domain-containing receptor 2 isoform X2 [Bos taurus]	gi|594106273|ref|XM_006076005.1|	3876	0	PREDICTED: Bubalus bubalis discoidin domain receptor tyrosine kinase 2 (DDR2), transcript variant X1, mRNA	Q16832	1610	0	Discoidin domain-containing receptor 2	.	.	.	.	pfam07714	Pkinase_Tyr	Protein tyrosine kinase.	GO:0031214|biomineral tissue development;GO:0007155|cell adhesion;GO:0035988|chondrocyte proliferation;GO:0030199|collagen fibril organization;GO:0038063|collagen-activated tyrosine kinase receptor signaling pathway;GO:0003416|endochondral bone growth;GO:0030198|extracellular matrix organization;GO:0001503|ossification;GO:0018108|peptidyl-tyrosine phosphorylation;GO:0090091|positive regulation of…	GO:0016324|apical plasma membrane;GO:0070062|extracellular exosome;GO:0005925|focal adhesion;GO:0005887|integral component of plasma membrane;GO:0005886|plasma membrane;	GO:0005524|ATP binding;GO:0005518|collagen binding;GO:0038062|protein tyrosine kinase collagen receptor activity;GO:0004714|transmembrane receptor protein tyrosine kinase activity;	K05125	DDR2, TKT; discoidin domain receptor family member 2 [EC:2.7.10.1]
oar_circ_0000181	0	3	0	0.389924	0	0	0	1.32957	0.379611	NA	up	no	NC_019458.2:112235125..112243222:+	gene1598	gi|528941827|ref|XP_005203575.1|	4346	0	PREDICTED: discoidin domain-containing receptor 2 isoform X2 [Bos taurus]	gi|594106273|ref|XM_006076005.1|	3876	0	PREDICTED: Bubalus bubalis discoidin domain receptor tyrosine kinase 2 (DDR2), transcript variant X1, mRNA	Q16832	1610	0	Discoidin domain-containing receptor 2	.	.	.	.	pfam07714	Pkinase_Tyr	Protein tyrosine kinase.	GO:0031214|biomineral tissue development;GO:0007155|cell adhesion;GO:0035988|chondrocyte proliferation;GO:0030199|collagen fibril organization;GO:0038063|collagen-activated tyrosine kinase receptor signaling pathway;GO:0003416|endochondral bone growth;GO:0030198|extracellular matrix organization;GO:0001503|ossification;GO:0018108|peptidyl-tyrosine phosphorylation;GO:0090091|positive regulation of…	GO:0016324|apical plasma membrane;GO:0070062|extracellular exosome;GO:0005925|focal adhesion;GO:0005887|integral component of plasma membrane;GO:0005886|plasma membrane;	GO:0005524|ATP binding;GO:0005518|collagen binding;GO:0038062|protein tyrosine kinase collagen receptor activity;GO:0004714|transmembrane receptor protein tyrosine kinase activity;	K05125	DDR2, TKT; discoidin domain receptor family member 2 [EC:2.7.10.1]
oar_circ_0000182	0	0	0	1.07666	0	4	2	-2.50486	0.11563	NA	down	no	NC_019458.2:112243012..112252533:+	gene1598	gi|528941827|ref|XP_005203575.1|	4346	0	PREDICTED: discoidin domain-containing receptor 2 isoform X2 [Bos taurus]	gi|594106273|ref|XM_006076005.1|	3876	0	PREDICTED: Bubalus bubalis discoidin domain receptor tyrosine kinase 2 (DDR2), transcript variant X1, mRNA	Q16832	1610	0	Discoidin domain-containing receptor 2	.	.	.	.	pfam07714	Pkinase_Tyr	Protein tyrosine kinase.	GO:0031214|biomineral tissue development;GO:0007155|cell adhesion;GO:0035988|chondrocyte proliferation;GO:0030199|collagen fibril organization;GO:0038063|collagen-activated tyrosine kinase receptor signaling pathway;GO:0003416|endochondral bone growth;GO:0030198|extracellular matrix organization;GO:0001503|ossification;GO:0018108|peptidyl-tyrosine phosphorylation;GO:0090091|positive regulation of…	GO:0016324|apical plasma membrane;GO:0070062|extracellular exosome;GO:0005925|focal adhesion;GO:0005887|integral component of plasma membrane;GO:0005886|plasma membrane;	GO:0005524|ATP binding;GO:0005518|collagen binding;GO:0038062|protein tyrosine kinase collagen receptor activity;GO:0004714|transmembrane receptor protein tyrosine kinase activity;	K05125	DDR2, TKT; discoidin domain receptor family member 2 [EC:2.7.10.1]
oar_circ_0000183	0	2	0	0.259949	0	0	0	1.18697	0.42538	NA	up	no	NC_019458.2:112249624..112252533:+	gene1598	gi|528941827|ref|XP_005203575.1|	4346	0	PREDICTED: discoidin domain-containing receptor 2 isoform X2 [Bos taurus]	gi|594106273|ref|XM_006076005.1|	3876	0	PREDICTED: Bubalus bubalis discoidin domain receptor tyrosine kinase 2 (DDR2), transcript variant X1, mRNA	Q16832	1610	0	Discoidin domain-containing receptor 2	.	.	.	.	pfam07714	Pkinase_Tyr	Protein tyrosine kinase.	GO:0031214|biomineral tissue development;GO:0007155|cell adhesion;GO:0035988|chondrocyte proliferation;GO:0030199|collagen fibril organization;GO:0038063|collagen-activated tyrosine kinase receptor signaling pathway;GO:0003416|endochondral bone growth;GO:0030198|extracellular matrix organization;GO:0001503|ossification;GO:0018108|peptidyl-tyrosine phosphorylation;GO:0090091|positive regulation of…	GO:0016324|apical plasma membrane;GO:0070062|extracellular exosome;GO:0005925|focal adhesion;GO:0005887|integral component of plasma membrane;GO:0005886|plasma membrane;	GO:0005524|ATP binding;GO:0005518|collagen binding;GO:0038062|protein tyrosine kinase collagen receptor activity;GO:0004714|transmembrane receptor protein tyrosine kinase activity;	K05125	DDR2, TKT; discoidin domain receptor family member 2 [EC:2.7.10.1]
oar_circ_0000185	0	6	4	1.81169	0	3	0	0.845619	0.571623	NA	up	no	NC_019458.2:112288437..112298472:+	gene1599	gi|556778173|ref|XP_005984166.1|	1868	0	PREDICTED: 3-keto-steroid reductase [Pantholops hodgsonii]	gi|548456104|ref|XM_005677120.1|	2179	0	PREDICTED: Capra hircus hydroxysteroid (17-beta) dehydrogenase 7 (HSD17B7), mRNA	P56937	94	2e-21	3-keto-steroid reductase	.	.	.	.	pfam00106	adh_short	short chain dehydrogenase. This family contains a wide variety of dehydrogenases.	GO:0006695|cholesterol biosynthetic process;GO:0006703|estrogen biosynthetic process;	GO:0005789|endoplasmic reticulum membrane;GO:0016021|integral component of membrane;GO:0005886|plasma membrane;	GO:0000253|3-keto sterol reductase activity;GO:0004303|estradiol 17-beta-dehydrogenase activity;	K13373	HSD17B7; 17beta-estradiol 17-dehydrogenase / 3beta-hydroxysteroid 3-dehydrogenase [EC:1.1.1.62 1.1.1.270]
oar_circ_0000186	0	0	0	0.353574	0	0	2	-1.33301	0.37664	NA	down	no	NC_019458.2:112962760..112965998:+	gene1606	gi|594057438|ref|XP_006052897.1|	2491	0	PREDICTED: kinetochore protein Nuf2 isoform X1 [Bubalus bubalis]	gi|548456092|ref|XM_005677114.1|	1752	0	PREDICTED: Capra hircus NUF2, NDC80 kinetochore complex component (NUF2), transcript variant X2, mRNA	Q9BZD4	869	0	Kinetochore protein Nuf2	.	.	.	.	pfam03800	Nuf2	Nuf2 family. Members of this family are components of the mitotic spindle. It has been shown that Nuf2 from yeast is part of a complex called the Ndc80p complex. This complex is thought to bind to the microtubules of the spindle. An arabidopsis protein has been included in this family that has previously not been identified as a member of this family. The match is not strong, but in common with o…	GO:0051301|cell division;GO:0007059|chromosome segregation;GO:0007067|mitotic nuclear division;GO:0007062|sister chromatid cohesion;	GO:0000775|chromosome, centromeric region;GO:0000777|condensed chromosome kinetochore;GO:0005829|cytosol;GO:0016020|membrane;GO:0031262|Ndc80 complex;GO:0005634|nucleus;	.	K11548	NUF2, CDCA1; kinetochore protein Nuf2
oar_circ_0000189	0	0	10	4.22838	7	4	6	-1.01226	0.410169	0.999963	down	no	NC_019458.2:114665720..114672186:+	gene1610	gi|4505623|ref|NP_002576.1|	1912	0	pre-B-cell leukemia transcription factor 1 isoform 1 [Homo sapiens]	gi|594109237|ref|XM_006077416.1|	4340	0	PREDICTED: Bubalus bubalis pre-B-cell leukemia homeobox 1 (PBX1), transcript variant X1, mRNA	P41778	741	0	Pre-B-cell leukemia transcription factor 1	.	.	.	.	pfam03792	PBC	PBC domain. The PBC domain is a member of the TALE (three-amino-acid loop extension) superclass of homeodomain proteins.	GO:0030325|adrenal gland development;GO:0009887|organ morphogenesis;GO:0009952|anterior/posterior pattern specification;GO:0001658|branching involved in ureteric bud morphogenesis;GO:0035162|embryonic hemopoiesis;GO:0030326|embryonic limb morphogenesis;GO:0048568|embryonic organ development;GO:0048706|embryonic skeletal system development;GO:0045665|negative regulation of neuron differentiation;G…	GO:0005737|cytoplasm;GO:0005654|nucleoplasm;GO:0005634|nucleus;GO:0005667|transcription factor complex;	GO:0003677|DNA binding;GO:0046982|protein heterodimerization activity;GO:0000978|RNA polymerase II core promoter proximal region sequence-specific DNA binding;GO:0043565|sequence-specific DNA binding;GO:0001077|transcriptional activator activity, RNA polymerase II core promoter proximal region sequence-specific binding;	K09355	PBX1; pre-B-cell leukemia transcription factor 1
oar_circ_0000190	3	0	0	0.99313	0	0	2	0.399805	0.801753	NA	up	no	NC_019458.2:114665720..114679733:+	gene1610	gi|4505623|ref|NP_002576.1|	1912	0	pre-B-cell leukemia transcription factor 1 isoform 1 [Homo sapiens]	gi|594109237|ref|XM_006077416.1|	4340	0	PREDICTED: Bubalus bubalis pre-B-cell leukemia homeobox 1 (PBX1), transcript variant X1, mRNA	P41778	741	0	Pre-B-cell leukemia transcription factor 1	.	.	.	.	pfam03792	PBC	PBC domain. The PBC domain is a member of the TALE (three-amino-acid loop extension) superclass of homeodomain proteins.	GO:0030325|adrenal gland development;GO:0009887|organ morphogenesis;GO:0009952|anterior/posterior pattern specification;GO:0001658|branching involved in ureteric bud morphogenesis;GO:0035162|embryonic hemopoiesis;GO:0030326|embryonic limb morphogenesis;GO:0048568|embryonic organ development;GO:0048706|embryonic skeletal system development;GO:0045665|negative regulation of neuron differentiation;G…	GO:0005737|cytoplasm;GO:0005654|nucleoplasm;GO:0005634|nucleus;GO:0005667|transcription factor complex;	GO:0003677|DNA binding;GO:0046982|protein heterodimerization activity;GO:0000978|RNA polymerase II core promoter proximal region sequence-specific DNA binding;GO:0043565|sequence-specific DNA binding;GO:0001077|transcriptional activator activity, RNA polymerase II core promoter proximal region sequence-specific binding;	K09355	PBX1; pre-B-cell leukemia transcription factor 1
oar_circ_0000191	3	4	9	4.3863	5	4	3	0.0864425	0.934453	0.999963	up	no	NC_019458.2:114665720..114686270:+	gene1610	gi|4505623|ref|NP_002576.1|	1912	0	pre-B-cell leukemia transcription factor 1 isoform 1 [Homo sapiens]	gi|594109237|ref|XM_006077416.1|	4340	0	PREDICTED: Bubalus bubalis pre-B-cell leukemia homeobox 1 (PBX1), transcript variant X1, mRNA	P41778	741	0	Pre-B-cell leukemia transcription factor 1	.	.	.	.	pfam03792	PBC	PBC domain. The PBC domain is a member of the TALE (three-amino-acid loop extension) superclass of homeodomain proteins.	GO:0030325|adrenal gland development;GO:0009887|organ morphogenesis;GO:0009952|anterior/posterior pattern specification;GO:0001658|branching involved in ureteric bud morphogenesis;GO:0035162|embryonic hemopoiesis;GO:0030326|embryonic limb morphogenesis;GO:0048568|embryonic organ development;GO:0048706|embryonic skeletal system development;GO:0045665|negative regulation of neuron differentiation;G…	GO:0005737|cytoplasm;GO:0005654|nucleoplasm;GO:0005634|nucleus;GO:0005667|transcription factor complex;	GO:0003677|DNA binding;GO:0046982|protein heterodimerization activity;GO:0000978|RNA polymerase II core promoter proximal region sequence-specific DNA binding;GO:0043565|sequence-specific DNA binding;GO:0001077|transcriptional activator activity, RNA polymerase II core promoter proximal region sequence-specific binding;	K09355	PBX1; pre-B-cell leukemia transcription factor 1
oar_circ_0000192	7	18	16	10.2247	7	8	10	0.37072	0.62702	0.999963	up	no	NC_019458.2:114665720..114694907:+	gene1610	gi|4505623|ref|NP_002576.1|	1912	0	pre-B-cell leukemia transcription factor 1 isoform 1 [Homo sapiens]	gi|594109237|ref|XM_006077416.1|	4340	0	PREDICTED: Bubalus bubalis pre-B-cell leukemia homeobox 1 (PBX1), transcript variant X1, mRNA	P41778	741	0	Pre-B-cell leukemia transcription factor 1	.	.	.	.	pfam03792	PBC	PBC domain. The PBC domain is a member of the TALE (three-amino-acid loop extension) superclass of homeodomain proteins.	GO:0030325|adrenal gland development;GO:0009887|organ morphogenesis;GO:0009952|anterior/posterior pattern specification;GO:0001658|branching involved in ureteric bud morphogenesis;GO:0035162|embryonic hemopoiesis;GO:0030326|embryonic limb morphogenesis;GO:0048568|embryonic organ development;GO:0048706|embryonic skeletal system development;GO:0045665|negative regulation of neuron differentiation;G…	GO:0005737|cytoplasm;GO:0005654|nucleoplasm;GO:0005634|nucleus;GO:0005667|transcription factor complex;	GO:0003677|DNA binding;GO:0046982|protein heterodimerization activity;GO:0000978|RNA polymerase II core promoter proximal region sequence-specific DNA binding;GO:0043565|sequence-specific DNA binding;GO:0001077|transcriptional activator activity, RNA polymerase II core promoter proximal region sequence-specific binding;	K09355	PBX1; pre-B-cell leukemia transcription factor 1
oar_circ_0000193	0	2	4	0.749474	0	0	0	1.96584	0.21471	NA	up	no	NC_019458.2:114671996..114694907:+	gene1610	gi|4505623|ref|NP_002576.1|	1912	0	pre-B-cell leukemia transcription factor 1 isoform 1 [Homo sapiens]	gi|594109237|ref|XM_006077416.1|	4340	0	PREDICTED: Bubalus bubalis pre-B-cell leukemia homeobox 1 (PBX1), transcript variant X1, mRNA	P41778	741	0	Pre-B-cell leukemia transcription factor 1	.	.	.	.	pfam03792	PBC	PBC domain. The PBC domain is a member of the TALE (three-amino-acid loop extension) superclass of homeodomain proteins.	GO:0030325|adrenal gland development;GO:0009887|organ morphogenesis;GO:0009952|anterior/posterior pattern specification;GO:0001658|branching involved in ureteric bud morphogenesis;GO:0035162|embryonic hemopoiesis;GO:0030326|embryonic limb morphogenesis;GO:0048568|embryonic organ development;GO:0048706|embryonic skeletal system development;GO:0045665|negative regulation of neuron differentiation;G…	GO:0005737|cytoplasm;GO:0005654|nucleoplasm;GO:0005634|nucleus;GO:0005667|transcription factor complex;	GO:0003677|DNA binding;GO:0046982|protein heterodimerization activity;GO:0000978|RNA polymerase II core promoter proximal region sequence-specific DNA binding;GO:0043565|sequence-specific DNA binding;GO:0001077|transcriptional activator activity, RNA polymerase II core promoter proximal region sequence-specific binding;	K09355	PBX1; pre-B-cell leukemia transcription factor 1
oar_circ_0000194	6	0	8	6.50582	8	6	10	-0.835266	0.413837	0.999963	down	no	NC_019458.2:114679598..114694907:+	gene1610	gi|4505623|ref|NP_002576.1|	1912	0	pre-B-cell leukemia transcription factor 1 isoform 1 [Homo sapiens]	gi|594109237|ref|XM_006077416.1|	4340	0	PREDICTED: Bubalus bubalis pre-B-cell leukemia homeobox 1 (PBX1), transcript variant X1, mRNA	P41778	741	0	Pre-B-cell leukemia transcription factor 1	.	.	.	.	pfam03792	PBC	PBC domain. The PBC domain is a member of the TALE (three-amino-acid loop extension) superclass of homeodomain proteins.	GO:0030325|adrenal gland development;GO:0009887|organ morphogenesis;GO:0009952|anterior/posterior pattern specification;GO:0001658|branching involved in ureteric bud morphogenesis;GO:0035162|embryonic hemopoiesis;GO:0030326|embryonic limb morphogenesis;GO:0048568|embryonic organ development;GO:0048706|embryonic skeletal system development;GO:0045665|negative regulation of neuron differentiation;G…	GO:0005737|cytoplasm;GO:0005654|nucleoplasm;GO:0005634|nucleus;GO:0005667|transcription factor complex;	GO:0003677|DNA binding;GO:0046982|protein heterodimerization activity;GO:0000978|RNA polymerase II core promoter proximal region sequence-specific DNA binding;GO:0043565|sequence-specific DNA binding;GO:0001077|transcriptional activator activity, RNA polymerase II core promoter proximal region sequence-specific binding;	K09355	PBX1; pre-B-cell leukemia transcription factor 1
oar_circ_0000196	2	0	0	0.426371	0	0	0	1.32953	0.379624	NA	up	no	NC_019458.2:115319289..115329617:-	gene1614	gi|548456061|ref|XP_005677155.1|	2156	0	PREDICTED: retinoic acid receptor RXR-gamma isoform X1 [Capra hircus]	gi|548456060|ref|XM_005677098.1|	1918	0	PREDICTED: Capra hircus retinoid X receptor, gamma (RXRG), transcript variant X1, mRNA	Q0VC20	97.4	4e-20	Retinoic acid receptor RXR-gamma	.	.	.	.	pfam00104	Hormone_recep	Ligand-binding domain of nuclear hormone receptor. This all helical domain is involved in binding the hormone in these receptors.	GO:1901522|positive regulation of transcription from RNA polymerase II promoter involved in cellular response to chemical stimulus;GO:0051289|protein homotetramerization;GO:0006351|transcription, DNA-templated;	GO:0005634|nucleus;	GO:0004886|9-cis retinoic acid receptor activity;GO:0000977|RNA polymerase II regulatory region sequence-specific DNA binding;GO:0003707|steroid hormone receptor activity;GO:0008270|zinc ion binding;	K08526	NR2B3, RXRG; retinoid X receptor gamma
oar_circ_0000198	3	8	12	6.18756	4	11	2	0.0639512	0.947773	0.999963	up	no	NC_019458.2:115686816..115690212:-	gene1619	gi|802996106|ref|XP_012040859.1|	2287	0	PREDICTED: LOW QUALITY PROTEIN: 4-trimethylaminobutyraldehyde dehydrogenase isoform X1 [Ovis aries]	gi|556778339|ref|XM_005984182.1|	1803	0	PREDICTED: Pantholops hodgsonii 4-trimethylaminobutyraldehyde dehydrogenase-like (LOC102319472), mRNA	Q2KJH9	842	0	4-trimethylaminobutyraldehyde dehydrogenase	.	.	.	.	pfam00171	Aldedh	Aldehyde dehydrogenase family. This family of dehydrogenases act on aldehyde substrates. Members use NADP as a cofactor. The family includes the following members: The prototypical members are the aldehyde dehydrogenases EC:1.2.1.3. Succinate-semialdehyde dehydrogenase EC:1.2.1.16. Lactaldehyde dehydrogenase EC:1.2.1.22. Benzaldehyde dehydrogenase EC:1.2.1.28. Methylmalonate-semialdehyde dehydrog…	GO:0045329|carnitine biosynthetic process;GO:0006081|cellular aldehyde metabolic process;GO:0042136|neurotransmitter biosynthetic process;GO:0055114|oxidation-reduction process;	GO:0005737|cytoplasm;	GO:0047105|4-trimethylammoniobutyraldehyde dehydrogenase activity;GO:0004029|aldehyde dehydrogenase (NAD) activity;GO:0019145|aminobutyraldehyde dehydrogenase activity;	K00149	ALDH9A1; aldehyde dehydrogenase family 9 member A1 [EC:1.2.1.47 1.2.1.3]
oar_circ_0000199	0	3	5	1.3554	0	0	2	0.94548	0.540445	NA	up	no	NC_019458.2:115701167..115717139:-	Null	.	.	.	.	.	.	.	.	.	.	.	.	.	.	.	.	.	.	.	.	.	.	.	.
oar_circ_0000200	2	0	0	0.77516	2	0	0	0.0965294	0.951548	NA	up	no	NC_019458.2:115701167..115734011:-	Null	.	.	.	.	.	.	.	.	.	.	.	.	.	.	.	.	.	.	.	.	.	.	.	.
oar_circ_0000201	0	0	2	0.244763	0	0	0	1.16974	0.431077	NA	up	no	NC_019458.2:115730579..115734011:-	Null	.	.	.	.	.	.	.	.	.	.	.	.	.	.	.	.	.	.	.	.	.	.	.	.
oar_circ_0000202	0	0	2	0.244763	0	0	0	1.16974	0.431077	NA	up	no	NC_019458.2:115730579..115783316:-	Null	.	.	.	.	.	.	.	.	.	.	.	.	.	.	.	.	.	.	.	.	.	.	.	.
oar_circ_0000203	0	13	10	6.1044	8	7	3	-0.0809847	0.937866	0.999963	down	no	NC_019458.2:115752552..115783316:-	gene1620	gi|371872752|ref|NP_061899.2|	920	4e-122	transmembrane and coiled-coil domain-containing protein 1 isoform a [Homo sapiens]	gi|548456048|ref|XM_005677092.1|	757	0	PREDICTED: Capra hircus transmembrane and coiled-coil domains 1 (TMCO1), mRNA	Q5I0H4	322	5e-110	Calcium load-activated calcium channel	.	.	.	.	pfam01956	DUF106	Integral membrane protein DUF106. This archaebacterial protein family has no known function. Members are predicted to be integral membrane proteins.	GO:0070588|calcium ion transmembrane transport;GO:0032469|endoplasmic reticulum calcium ion homeostasis;GO:0006983|ER overload response;	GO:0000139|Golgi membrane;GO:0030176|integral component of endoplasmic reticulum membrane;	GO:0005262|calcium channel activity;	.	.
oar_circ_0000204	3	2	0	1.42269	3	0	0	0.456722	0.767273	NA	up	no	NC_019458.2:115770094..115783316:-	gene1620	gi|371872752|ref|NP_061899.2|	920	4e-122	transmembrane and coiled-coil domain-containing protein 1 isoform a [Homo sapiens]	gi|548456048|ref|XM_005677092.1|	757	0	PREDICTED: Capra hircus transmembrane and coiled-coil domains 1 (TMCO1), mRNA	Q5I0H4	322	5e-110	Calcium load-activated calcium channel	.	.	.	.	pfam01956	DUF106	Integral membrane protein DUF106. This archaebacterial protein family has no known function. Members are predicted to be integral membrane proteins.	GO:0070588|calcium ion transmembrane transport;GO:0032469|endoplasmic reticulum calcium ion homeostasis;GO:0006983|ER overload response;	GO:0000139|Golgi membrane;GO:0030176|integral component of endoplasmic reticulum membrane;	GO:0005262|calcium channel activity;	.	.
oar_circ_0000205	0	3	0	0.389924	0	0	0	1.32957	0.379611	NA	up	no	NC_019458.2:115899294..115907160:+	gene1621	gi|802996111|ref|XP_012040877.1|	1329	2e-174	PREDICTED: uridine-cytidine kinase 2 isoform X4 [Ovis aries]	gi|594638436|ref|XM_007172449.1|	887	0	PREDICTED: Balaenoptera acutorostrata scammoni uridine-cytidine kinase 2 (UCK2), transcript variant X4, mRNA	Q9QYG8	462	1e-154	Uridine-cytidine kinase 2	BH1275	170	7e-47	COG0572	pfam00485	PRK	Phosphoribulokinase / Uridine kinase family. In Arabidopsis the region carries two binding domains, a phosphoribosylpyrophosphate-binding domain and, at the very C-terminus, a uracil-binding domain.	GO:0071453|cellular response to oxygen levels;GO:0006238|CMP salvage;GO:0044211|CTP salvage;GO:0007631|feeding behavior;GO:0016579|protein deubiquitination;GO:0006206|pyrimidine nucleobase metabolic process;GO:0043097|pyrimidine nucleoside salvage;GO:0048678|response to axon injury;GO:0044206|UMP salvage;	GO:0005829|cytosol;GO:0043231|intracellular membrane-bounded organelle;	GO:0005524|ATP binding;GO:0004849|uridine kinase activity;	.	.
oar_circ_0000206	2	0	0	0.426371	0	0	0	1.32953	0.379624	NA	up	no	NC_019458.2:116086325..116099525:-	Null	.	.	.	.	.	.	.	.	.	.	.	.	.	.	.	.	.	.	.	.	.	.	.	.
oar_circ_0000207	0	0	2	0.244763	0	0	0	1.16974	0.431077	NA	up	no	NC_019458.2:116850826..116856879:-	gene1627	gi|803332754|ref|XP_012024486.1|	2429	0	PREDICTED: immunoglobulin-like domain-containing receptor 2 isoform X2 [Ovis aries musimon]	gi|156120792|ref|NM_001102073.1|	3042	0	Bos taurus immunoglobulin-like domain containing receptor 2 (ILDR2), mRNA	Q71H61	866	0	Immunoglobulin-like domain-containing receptor 2	.	.	.	.	pfam09234	DUF1963	Domain of unknown function (DUF1963). This domain is found in a set of hypothetical bacterial proteins. Its exact function has not, as yet, been described.	GO:0030154|cell differentiation;GO:0048873|homeostasis of number of cells within a tissue;GO:0030073|insulin secretion;GO:0031016|pancreas development;GO:0009749|response to glucose;	GO:0005789|endoplasmic reticulum membrane;GO:0016021|integral component of membrane;	.	.	.
oar_circ_0000208	0	0	2	0.775123	0	0	3	-0.493187	0.756316	NA	down	no	NC_019458.2:116865098..116895613:-	gene1627	gi|803332754|ref|XP_012024486.1|	2429	0	PREDICTED: immunoglobulin-like domain-containing receptor 2 isoform X2 [Ovis aries musimon]	gi|156120792|ref|NM_001102073.1|	3042	0	Bos taurus immunoglobulin-like domain containing receptor 2 (ILDR2), mRNA	Q71H61	866	0	Immunoglobulin-like domain-containing receptor 2	.	.	.	.	pfam09234	DUF1963	Domain of unknown function (DUF1963). This domain is found in a set of hypothetical bacterial proteins. Its exact function has not, as yet, been described.	GO:0030154|cell differentiation;GO:0048873|homeostasis of number of cells within a tissue;GO:0030073|insulin secretion;GO:0031016|pancreas development;GO:0009749|response to glucose;	GO:0005789|endoplasmic reticulum membrane;GO:0016021|integral component of membrane;	.	.	.
oar_circ_0000209	16	33	29	21.6812	26	16	17	0.107978	0.84895	0.999963	up	no	NC_019458.2:116894123..116895613:-	gene1627	gi|803332754|ref|XP_012024486.1|	2429	0	PREDICTED: immunoglobulin-like domain-containing receptor 2 isoform X2 [Ovis aries musimon]	gi|156120792|ref|NM_001102073.1|	3042	0	Bos taurus immunoglobulin-like domain containing receptor 2 (ILDR2), mRNA	Q71H61	866	0	Immunoglobulin-like domain-containing receptor 2	.	.	.	.	pfam09234	DUF1963	Domain of unknown function (DUF1963). This domain is found in a set of hypothetical bacterial proteins. Its exact function has not, as yet, been described.	GO:0030154|cell differentiation;GO:0048873|homeostasis of number of cells within a tissue;GO:0030073|insulin secretion;GO:0031016|pancreas development;GO:0009749|response to glucose;	GO:0005789|endoplasmic reticulum membrane;GO:0016021|integral component of membrane;	.	.	.
oar_circ_0000211	0	0	2	0.244763	0	0	0	1.16974	0.431077	NA	up	no	NC_019458.2:117444257..117477152:+	gene1633	gi|426217075|ref|XP_004002779.1|	1668	0	PREDICTED: POU domain, class 2, transcription factor 1 isoform X3 [Ovis aries]	gi|594063048|ref|XM_006055504.1|	11202	0	PREDICTED: Bubalus bubalis POU class 2 homeobox 1 (POU2F1), transcript variant X3, mRNA	Q29076	209	2e-53	POU domain, class 2, transcription factor 1	.	.	.	.	pfam00157	Pou	Pou domain - N-terminal to homeobox domain.	GO:0045892|negative regulation of transcription, DNA-templated;GO:0006351|transcription, DNA-templated;	GO:0005634|nucleus;	GO:0043565|sequence-specific DNA binding;GO:0003700|transcription factor activity, sequence-specific DNA binding;	K09364	POU2F, OTF; POU domain transcription factor, class 2
oar_circ_0000214	4	3	3	2.85449	2	3	2	0.281328	0.815929	0.999963	up	no	NC_019458.2:117869837..117877326:+	gene1644	gi|802996153|ref|XP_012041078.1|	1262	6e-161	PREDICTED: myelin protein zero-like protein 1 isoform X1 [Ovis aries]	gi|548456078|ref|XM_005677107.1|	2972	0	PREDICTED: Capra hircus myelin protein zero-like 1 (MPZL1), mRNA	Q32PI9	440	2e-143	Myelin protein zero-like protein 1	.	.	.	.	pfam07686	V-set	Immunoglobulin V-set domain. This domain is found in antibodies as well as neural protein P0 and CTL4 amongst others.	GO:0007165|signal transduction;	GO:0009986|cell surface;GO:0005925|focal adhesion;GO:0005887|integral component of plasma membrane;	.	K06770	MPZ; myelin protein zero
oar_circ_0000216	0	3	2	0.634686	0	0	0	1.76392	0.261515	NA	up	no	NC_019458.2:117876045..117879864:+	gene1644	gi|802996153|ref|XP_012041078.1|	1262	6e-161	PREDICTED: myelin protein zero-like protein 1 isoform X1 [Ovis aries]	gi|548456078|ref|XM_005677107.1|	2972	0	PREDICTED: Capra hircus myelin protein zero-like 1 (MPZL1), mRNA	Q32PI9	440	2e-143	Myelin protein zero-like protein 1	.	.	.	.	pfam07686	V-set	Immunoglobulin V-set domain. This domain is found in antibodies as well as neural protein P0 and CTL4 amongst others.	GO:0007165|signal transduction;	GO:0009986|cell surface;GO:0005925|focal adhesion;GO:0005887|integral component of plasma membrane;	.	K06770	MPZ; myelin protein zero
oar_circ_0000217	2	2	0	0.68632	0	0	0	1.82136	0.247787	NA	up	no	NC_019458.2:117992012..118016289:-	gene1645	gi|556746016|ref|XP_005968482.1|	8366	0	PREDICTED: adenylate cyclase type 10 [Pantholops hodgsonii]	gi|594054928|ref|XM_006051650.1|	4888	0	PREDICTED: Bubalus bubalis adenylate cyclase 10 (soluble) (ADCY10), mRNA	Q866F4	2829	0	Adenylate cyclase type 10	alr2266_3	65.9	2e-10	COG2114	pfam00211	Guanylate_cyc	Adenylate and Guanylate cyclase catalytic domain.	GO:0006171|cAMP biosynthetic process;GO:0071241|cellular response to inorganic substance;GO:0003351|epithelial cilium movement;GO:0035556|intracellular signal transduction;GO:0007283|spermatogenesis;	GO:0005929|cilium;GO:0005856|cytoskeleton;GO:0005634|nucleus;GO:0048471|perinuclear region of cytoplasm;GO:0005886|plasma membrane;	GO:0004016|adenylate cyclase activity;GO:0005524|ATP binding;GO:0071890|bicarbonate binding;GO:0000287|magnesium ion binding;	K11265	ADCY10; adenylate cyclase 10 [EC:4.6.1.1]
oar_circ_0000218	0	2	0	0.259949	0	0	0	1.18697	0.42538	NA	up	no	NC_019458.2:118036039..118046650:-	gene1646	gi|587017853|ref|XP_003999202.2|	723	6e-93	PREDICTED: mitochondrial pyruvate carrier 2 isoform X1 [Felis catus]	gi|555970008|ref|XM_005896965.1|	704	0	PREDICTED: Bos mutus mitochondrial pyruvate carrier 2 (MPC2), transcript variant X1, mRNA	O95563	253	3e-83	Mitochondrial pyruvate carrier 2	.	.	.	.	pfam03650	MPC	Uncharacterized protein family (UPF0041).	GO:0061732|mitochondrial acetyl-CoA biosynthetic process from pyruvate;GO:1902361|mitochondrial pyruvate transmembrane transport;GO:0035774|positive regulation of insulin secretion involved in cellular response to glucose stimulus;	GO:0016021|integral component of membrane;GO:0005743|mitochondrial inner membrane;GO:0005739|mitochondrion;GO:0005634|nucleus;	GO:0050833|pyruvate transmembrane transporter activity;	.	.
oar_circ_0000220	0	3	3	1.65295	0	3	2	-0.13447	0.926914	NA	down	no	NC_019458.2:118101947..118132265:+	gene1647	gi|802996157|ref|XP_012041101.1|	4358	0	PREDICTED: DDB1- and CUL4-associated factor 6 isoform X1 [Ovis aries]	gi|555970000|ref|XM_005896961.1|	3300	0	PREDICTED: Bos mutus DDB1 and CUL4 associated factor 6 (DCAF6), transcript variant X1, mRNA	Q58WW2	1475	0	DDB1- and CUL4-associated factor 6	.	.	.	.	pfam00400	WD40	WD domain, G-beta repeat.	GO:0016567|protein ubiquitination;	GO:0080008|Cul4-RING E3 ubiquitin ligase complex;GO:0005634|nucleus;	.	K11795	IQWD1, NRIP, ARCAP; nuclear receptor interaction protein
oar_circ_0000221	0	0	0	0.523184	3	0	0	-1.46707	0.336722	NA	down	no	NC_019458.2:118101947..118155063:+	gene1647	gi|802996157|ref|XP_012041101.1|	4358	0	PREDICTED: DDB1- and CUL4-associated factor 6 isoform X1 [Ovis aries]	gi|555970000|ref|XM_005896961.1|	3300	0	PREDICTED: Bos mutus DDB1 and CUL4 associated factor 6 (DCAF6), transcript variant X1, mRNA	Q58WW2	1475	0	DDB1- and CUL4-associated factor 6	.	.	.	.	pfam00400	WD40	WD domain, G-beta repeat.	GO:0016567|protein ubiquitination;	GO:0080008|Cul4-RING E3 ubiquitin ligase complex;GO:0005634|nucleus;	.	K11795	IQWD1, NRIP, ARCAP; nuclear receptor interaction protein
oar_circ_0000222	0	0	0	0.348789	2	0	0	-1.32922	0.377798	NA	down	no	NC_019458.2:118101947..118157335:+	gene1647	gi|802996157|ref|XP_012041101.1|	4358	0	PREDICTED: DDB1- and CUL4-associated factor 6 isoform X1 [Ovis aries]	gi|555970000|ref|XM_005896961.1|	3300	0	PREDICTED: Bos mutus DDB1 and CUL4 associated factor 6 (DCAF6), transcript variant X1, mRNA	Q58WW2	1475	0	DDB1- and CUL4-associated factor 6	.	.	.	.	pfam00400	WD40	WD domain, G-beta repeat.	GO:0016567|protein ubiquitination;	GO:0080008|Cul4-RING E3 ubiquitin ligase complex;GO:0005634|nucleus;	.	K11795	IQWD1, NRIP, ARCAP; nuclear receptor interaction protein
oar_circ_0000223	4	2	2	3.50758	3	9	0	-0.57417	0.644175	0.999963	down	no	NC_019458.2:118101947..118167570:+	gene1647	gi|802996157|ref|XP_012041101.1|	4358	0	PREDICTED: DDB1- and CUL4-associated factor 6 isoform X1 [Ovis aries]	gi|555970000|ref|XM_005896961.1|	3300	0	PREDICTED: Bos mutus DDB1 and CUL4 associated factor 6 (DCAF6), transcript variant X1, mRNA	Q58WW2	1475	0	DDB1- and CUL4-associated factor 6	.	.	.	.	pfam00400	WD40	WD domain, G-beta repeat.	GO:0016567|protein ubiquitination;	GO:0080008|Cul4-RING E3 ubiquitin ligase complex;GO:0005634|nucleus;	.	K11795	IQWD1, NRIP, ARCAP; nuclear receptor interaction protein
oar_circ_0000224	0	0	0	0.530361	0	0	3	-1.47083	0.335636	NA	down	no	NC_019458.2:118118722..118132265:+	gene1647	gi|802996157|ref|XP_012041101.1|	4358	0	PREDICTED: DDB1- and CUL4-associated factor 6 isoform X1 [Ovis aries]	gi|555970000|ref|XM_005896961.1|	3300	0	PREDICTED: Bos mutus DDB1 and CUL4 associated factor 6 (DCAF6), transcript variant X1, mRNA	Q58WW2	1475	0	DDB1- and CUL4-associated factor 6	.	.	.	.	pfam00400	WD40	WD domain, G-beta repeat.	GO:0016567|protein ubiquitination;	GO:0080008|Cul4-RING E3 ubiquitin ligase complex;GO:0005634|nucleus;	.	K11795	IQWD1, NRIP, ARCAP; nuclear receptor interaction protein
oar_circ_0000225	2	0	0	1.87254	0	8	0	-0.712051	0.649256	0.999963	down	no	NC_019458.2:118118722..118157335:+	gene1647	gi|802996157|ref|XP_012041101.1|	4358	0	PREDICTED: DDB1- and CUL4-associated factor 6 isoform X1 [Ovis aries]	gi|555970000|ref|XM_005896961.1|	3300	0	PREDICTED: Bos mutus DDB1 and CUL4 associated factor 6 (DCAF6), transcript variant X1, mRNA	Q58WW2	1475	0	DDB1- and CUL4-associated factor 6	.	.	.	.	pfam00400	WD40	WD domain, G-beta repeat.	GO:0016567|protein ubiquitination;	GO:0080008|Cul4-RING E3 ubiquitin ligase complex;GO:0005634|nucleus;	.	K11795	IQWD1, NRIP, ARCAP; nuclear receptor interaction protein
oar_circ_0000227	3	6	5	4.50473	4	2	8	-0.24731	0.814592	0.999963	down	no	NC_019458.2:118118722..118167570:+	gene1647	gi|802996157|ref|XP_012041101.1|	4358	0	PREDICTED: DDB1- and CUL4-associated factor 6 isoform X1 [Ovis aries]	gi|555970000|ref|XM_005896961.1|	3300	0	PREDICTED: Bos mutus DDB1 and CUL4 associated factor 6 (DCAF6), transcript variant X1, mRNA	Q58WW2	1475	0	DDB1- and CUL4-associated factor 6	.	.	.	.	pfam00400	WD40	WD domain, G-beta repeat.	GO:0016567|protein ubiquitination;	GO:0080008|Cul4-RING E3 ubiquitin ligase complex;GO:0005634|nucleus;	.	K11795	IQWD1, NRIP, ARCAP; nuclear receptor interaction protein
oar_circ_0000228	3	0	0	0.988345	2	0	0	0.407249	0.798149	NA	up	no	NC_019458.2:118132080..118155063:+	gene1647	gi|802996157|ref|XP_012041101.1|	4358	0	PREDICTED: DDB1- and CUL4-associated factor 6 isoform X1 [Ovis aries]	gi|555970000|ref|XM_005896961.1|	3300	0	PREDICTED: Bos mutus DDB1 and CUL4 associated factor 6 (DCAF6), transcript variant X1, mRNA	Q58WW2	1475	0	DDB1- and CUL4-associated factor 6	.	.	.	.	pfam00400	WD40	WD domain, G-beta repeat.	GO:0016567|protein ubiquitination;	GO:0080008|Cul4-RING E3 ubiquitin ligase complex;GO:0005634|nucleus;	.	K11795	IQWD1, NRIP, ARCAP; nuclear receptor interaction protein
oar_circ_0000229	2	4	5	2.26851	2	2	0	0.881126	0.508827	0.999963	up	no	NC_019458.2:118132080..118157335:+	gene1647	gi|802996157|ref|XP_012041101.1|	4358	0	PREDICTED: DDB1- and CUL4-associated factor 6 isoform X1 [Ovis aries]	gi|555970000|ref|XM_005896961.1|	3300	0	PREDICTED: Bos mutus DDB1 and CUL4 associated factor 6 (DCAF6), transcript variant X1, mRNA	Q58WW2	1475	0	DDB1- and CUL4-associated factor 6	.	.	.	.	pfam00400	WD40	WD domain, G-beta repeat.	GO:0016567|protein ubiquitination;	GO:0080008|Cul4-RING E3 ubiquitin ligase complex;GO:0005634|nucleus;	.	K11795	IQWD1, NRIP, ARCAP; nuclear receptor interaction protein
oar_circ_0000230	2	2	5	2.69817	6	0	2	-0.086847	0.946622	0.999963	down	no	NC_019458.2:118132080..118167570:+	gene1647	gi|802996157|ref|XP_012041101.1|	4358	0	PREDICTED: DDB1- and CUL4-associated factor 6 isoform X1 [Ovis aries]	gi|555970000|ref|XM_005896961.1|	3300	0	PREDICTED: Bos mutus DDB1 and CUL4 associated factor 6 (DCAF6), transcript variant X1, mRNA	Q58WW2	1475	0	DDB1- and CUL4-associated factor 6	.	.	.	.	pfam00400	WD40	WD domain, G-beta repeat.	GO:0016567|protein ubiquitination;	GO:0080008|Cul4-RING E3 ubiquitin ligase complex;GO:0005634|nucleus;	.	K11795	IQWD1, NRIP, ARCAP; nuclear receptor interaction protein
oar_circ_0000231	0	0	3	0.367144	0	0	0	1.3119	0.385146	NA	up	no	NC_019458.2:118152367..118157335:+	gene1647	gi|802996157|ref|XP_012041101.1|	4358	0	PREDICTED: DDB1- and CUL4-associated factor 6 isoform X1 [Ovis aries]	gi|555970000|ref|XM_005896961.1|	3300	0	PREDICTED: Bos mutus DDB1 and CUL4 associated factor 6 (DCAF6), transcript variant X1, mRNA	Q58WW2	1475	0	DDB1- and CUL4-associated factor 6	.	.	.	.	pfam00400	WD40	WD domain, G-beta repeat.	GO:0016567|protein ubiquitination;	GO:0080008|Cul4-RING E3 ubiquitin ligase complex;GO:0005634|nucleus;	.	K11795	IQWD1, NRIP, ARCAP; nuclear receptor interaction protein
oar_circ_0000232	2	14	4	6.65991	2	10	10	-0.444008	0.651695	0.999963	down	no	NC_019458.2:118152367..118167570:+	gene1647	gi|802996157|ref|XP_012041101.1|	4358	0	PREDICTED: DDB1- and CUL4-associated factor 6 isoform X1 [Ovis aries]	gi|555970000|ref|XM_005896961.1|	3300	0	PREDICTED: Bos mutus DDB1 and CUL4 associated factor 6 (DCAF6), transcript variant X1, mRNA	Q58WW2	1475	0	DDB1- and CUL4-associated factor 6	.	.	.	.	pfam00400	WD40	WD domain, G-beta repeat.	GO:0016567|protein ubiquitination;	GO:0080008|Cul4-RING E3 ubiquitin ligase complex;GO:0005634|nucleus;	.	K11795	IQWD1, NRIP, ARCAP; nuclear receptor interaction protein
oar_circ_0000234	0	2	0	0.259949	0	0	0	1.18697	0.42538	NA	up	no	NC_019458.2:118152367..118207326:+	gene1647	gi|802996157|ref|XP_012041101.1|	4358	0	PREDICTED: DDB1- and CUL4-associated factor 6 isoform X1 [Ovis aries]	gi|555970000|ref|XM_005896961.1|	3300	0	PREDICTED: Bos mutus DDB1 and CUL4 associated factor 6 (DCAF6), transcript variant X1, mRNA	Q58WW2	1475	0	DDB1- and CUL4-associated factor 6	.	.	.	.	pfam00400	WD40	WD domain, G-beta repeat.	GO:0016567|protein ubiquitination;	GO:0080008|Cul4-RING E3 ubiquitin ligase complex;GO:0005634|nucleus;	.	K11795	IQWD1, NRIP, ARCAP; nuclear receptor interaction protein
oar_circ_0000235	0	4	2	1.64381	2	0	3	-0.110685	0.939947	NA	down	no	NC_019458.2:118164291..118167570:+	gene1647	gi|802996157|ref|XP_012041101.1|	4358	0	PREDICTED: DDB1- and CUL4-associated factor 6 isoform X1 [Ovis aries]	gi|555970000|ref|XM_005896961.1|	3300	0	PREDICTED: Bos mutus DDB1 and CUL4 associated factor 6 (DCAF6), transcript variant X1, mRNA	Q58WW2	1475	0	DDB1- and CUL4-associated factor 6	.	.	.	.	pfam00400	WD40	WD domain, G-beta repeat.	GO:0016567|protein ubiquitination;	GO:0080008|Cul4-RING E3 ubiquitin ligase complex;GO:0005634|nucleus;	.	K11795	IQWD1, NRIP, ARCAP; nuclear receptor interaction protein
oar_circ_0000236	0	6	0	1.14139	0	2	0	0.611464	0.700094	NA	up	no	NC_019458.2:118164291..118179089:+	gene1647	gi|802996157|ref|XP_012041101.1|	4358	0	PREDICTED: DDB1- and CUL4-associated factor 6 isoform X1 [Ovis aries]	gi|555970000|ref|XM_005896961.1|	3300	0	PREDICTED: Bos mutus DDB1 and CUL4 associated factor 6 (DCAF6), transcript variant X1, mRNA	Q58WW2	1475	0	DDB1- and CUL4-associated factor 6	.	.	.	.	pfam00400	WD40	WD domain, G-beta repeat.	GO:0016567|protein ubiquitination;	GO:0080008|Cul4-RING E3 ubiquitin ligase complex;GO:0005634|nucleus;	.	K11795	IQWD1, NRIP, ARCAP; nuclear receptor interaction protein
oar_circ_0000237	0	5	4	3.97356	6	5	5	-1.0603	0.353049	0.999963	down	no	NC_019458.2:118164291..118183147:+	gene1647	gi|802996157|ref|XP_012041101.1|	4358	0	PREDICTED: DDB1- and CUL4-associated factor 6 isoform X1 [Ovis aries]	gi|555970000|ref|XM_005896961.1|	3300	0	PREDICTED: Bos mutus DDB1 and CUL4 associated factor 6 (DCAF6), transcript variant X1, mRNA	Q58WW2	1475	0	DDB1- and CUL4-associated factor 6	.	.	.	.	pfam00400	WD40	WD domain, G-beta repeat.	GO:0016567|protein ubiquitination;	GO:0080008|Cul4-RING E3 ubiquitin ligase complex;GO:0005634|nucleus;	.	K11795	IQWD1, NRIP, ARCAP; nuclear receptor interaction protein
oar_circ_0000240	0	0	0	0.361542	0	2	0	-1.3392	0.374749	NA	down	no	NC_019458.2:118178919..118207326:+	gene1647	gi|802996157|ref|XP_012041101.1|	4358	0	PREDICTED: DDB1- and CUL4-associated factor 6 isoform X1 [Ovis aries]	gi|555970000|ref|XM_005896961.1|	3300	0	PREDICTED: Bos mutus DDB1 and CUL4 associated factor 6 (DCAF6), transcript variant X1, mRNA	Q58WW2	1475	0	DDB1- and CUL4-associated factor 6	.	.	.	.	pfam00400	WD40	WD domain, G-beta repeat.	GO:0016567|protein ubiquitination;	GO:0080008|Cul4-RING E3 ubiquitin ligase complex;GO:0005634|nucleus;	.	K11795	IQWD1, NRIP, ARCAP; nuclear receptor interaction protein
oar_circ_0000241	0	0	0	0.723085	0	4	0	-1.7554	0.261512	NA	down	no	NC_019458.2:118186126..118207326:+	gene1647	gi|802996157|ref|XP_012041101.1|	4358	0	PREDICTED: DDB1- and CUL4-associated factor 6 isoform X1 [Ovis aries]	gi|555970000|ref|XM_005896961.1|	3300	0	PREDICTED: Bos mutus DDB1 and CUL4 associated factor 6 (DCAF6), transcript variant X1, mRNA	Q58WW2	1475	0	DDB1- and CUL4-associated factor 6	.	.	.	.	pfam00400	WD40	WD domain, G-beta repeat.	GO:0016567|protein ubiquitination;	GO:0080008|Cul4-RING E3 ubiquitin ligase complex;GO:0005634|nucleus;	.	K11795	IQWD1, NRIP, ARCAP; nuclear receptor interaction protein
oar_circ_0000243	0	0	3	1.06472	4	0	0	-0.465398	0.769743	NA	down	no	NC_019458.2:118205257..118238334:+	gene1647	gi|802996157|ref|XP_012041101.1|	4358	0	PREDICTED: DDB1- and CUL4-associated factor 6 isoform X1 [Ovis aries]	gi|555970000|ref|XM_005896961.1|	3300	0	PREDICTED: Bos mutus DDB1 and CUL4 associated factor 6 (DCAF6), transcript variant X1, mRNA	Q58WW2	1475	0	DDB1- and CUL4-associated factor 6	.	.	.	.	pfam00400	WD40	WD domain, G-beta repeat.	GO:0016567|protein ubiquitination;	GO:0080008|Cul4-RING E3 ubiquitin ligase complex;GO:0005634|nucleus;	.	K11795	IQWD1, NRIP, ARCAP; nuclear receptor interaction protein
oar_circ_0000244	5	9	8	6.59202	4	7	8	-0.06427	0.943312	0.999963	down	no	NC_019458.2:118226940..118238334:+	gene1647	gi|802996157|ref|XP_012041101.1|	4358	0	PREDICTED: DDB1- and CUL4-associated factor 6 isoform X1 [Ovis aries]	gi|555970000|ref|XM_005896961.1|	3300	0	PREDICTED: Bos mutus DDB1 and CUL4 associated factor 6 (DCAF6), transcript variant X1, mRNA	Q58WW2	1475	0	DDB1- and CUL4-associated factor 6	.	.	.	.	pfam00400	WD40	WD domain, G-beta repeat.	GO:0016567|protein ubiquitination;	GO:0080008|Cul4-RING E3 ubiquitin ligase complex;GO:0005634|nucleus;	.	K11795	IQWD1, NRIP, ARCAP; nuclear receptor interaction protein
oar_circ_0000246	0	3	4	3.00726	4	4	4	-0.984139	0.424838	0.999963	down	no	NC_019458.2:118228960..118238334:+	gene1647	gi|802996157|ref|XP_012041101.1|	4358	0	PREDICTED: DDB1- and CUL4-associated factor 6 isoform X1 [Ovis aries]	gi|555970000|ref|XM_005896961.1|	3300	0	PREDICTED: Bos mutus DDB1 and CUL4 associated factor 6 (DCAF6), transcript variant X1, mRNA	Q58WW2	1475	0	DDB1- and CUL4-associated factor 6	.	.	.	.	pfam00400	WD40	WD domain, G-beta repeat.	GO:0016567|protein ubiquitination;	GO:0080008|Cul4-RING E3 ubiquitin ligase complex;GO:0005634|nucleus;	.	K11795	IQWD1, NRIP, ARCAP; nuclear receptor interaction protein
oar_circ_0000247	0	0	2	0.244763	0	0	0	1.16974	0.431077	NA	up	no	NC_019458.2:118268565..118279751:-	gene1648	gi|426217097|ref|XP_004002790.1|	2468	0	PREDICTED: G-protein coupled receptor 161 isoform X1 [Ovis aries]	gi|594054902|ref|XM_006051638.1|	3585	0	PREDICTED: Bubalus bubalis G protein-coupled receptor 161-like (LOC102404725), transcript variant X1, mRNA	Q2YDN1	934	0	G protein-coupled receptor 161	.	.	.	.	pfam00001	7tm_1	7 transmembrane receptor (rhodopsin family). This family contains, amongst other G-protein-coupled receptors (GCPRs), members of the opsin family, which have been considered to be typical members of the rhodopsin superfamily. They share several motifs, mainly the seven transmembrane helices, GCPRs of the rhodopsin superfamily. All opsins bind a chromophore, such as 11-cis-retinal. The function of…	GO:0007186|G-protein coupled receptor signaling pathway;GO:0007275|multicellular organismal development;GO:1901621|negative regulation of smoothened signaling pathway involved in dorsal/ventral neural tube patterning;GO:0030819|positive regulation of cAMP biosynthetic process;	GO:0060170|ciliary membrane;GO:0016021|integral component of membrane;GO:0072372|primary cilium;GO:0055037|recycling endosome;	GO:0004930|G-protein coupled receptor activity;	K08439	GPR161; G protein-coupled receptor 161
oar_circ_0000248	0	0	2	0.244763	0	0	0	1.16974	0.431077	NA	up	no	NC_019458.2:118268565..118279824:-	gene1648	gi|426217097|ref|XP_004002790.1|	2468	0	PREDICTED: G-protein coupled receptor 161 isoform X1 [Ovis aries]	gi|594054902|ref|XM_006051638.1|	3585	0	PREDICTED: Bubalus bubalis G protein-coupled receptor 161-like (LOC102404725), transcript variant X1, mRNA	Q2YDN1	934	0	G protein-coupled receptor 161	.	.	.	.	pfam00001	7tm_1	7 transmembrane receptor (rhodopsin family). This family contains, amongst other G-protein-coupled receptors (GCPRs), members of the opsin family, which have been considered to be typical members of the rhodopsin superfamily. They share several motifs, mainly the seven transmembrane helices, GCPRs of the rhodopsin superfamily. All opsins bind a chromophore, such as 11-cis-retinal. The function of…	GO:0007186|G-protein coupled receptor signaling pathway;GO:0007275|multicellular organismal development;GO:1901621|negative regulation of smoothened signaling pathway involved in dorsal/ventral neural tube patterning;GO:0030819|positive regulation of cAMP biosynthetic process;	GO:0060170|ciliary membrane;GO:0016021|integral component of membrane;GO:0072372|primary cilium;GO:0055037|recycling endosome;	GO:0004930|G-protein coupled receptor activity;	K08439	GPR161; G protein-coupled receptor 161
oar_circ_0000250	16	25	34	24.6576	27	28	23	-0.340971	0.521126	0.999963	down	no	NC_019458.2:118366953..118379783:+	gene1649	gi|426217103|ref|XP_004002793.1|	1345	7e-176	PREDICTED: TIP41-like protein isoform X2 [Ovis aries]	gi|556746009|ref|XM_005968417.1|	2562	0	PREDICTED: Pantholops hodgsonii TIP41, TOR signaling pathway regulator-like (S. cerevisiae) (TIPRL), mRNA	O75663	425	1e-139	TIP41-like protein	.	.	.	.	pfam04176	TIP41	TIP41-like family. The TOR signalling pathway activates a cell-growth program in response to nutrients. TIP41 interacts with TAP42 and negatively regulates the TOR signaling pathway.	GO:0000077|DNA damage checkpoint;GO:0034048|negative regulation of protein phosphatase type 2A activity;	GO:0005737|cytoplasm;GO:0043231|intracellular membrane-bounded organelle;	.	K17607	TIPRL, TIP41; type 2A phosphatase activator TIP41
oar_circ_0000252	0	3	11	2.63997	0	5	0	0.704203	0.621566	0.999963	up	no	NC_019458.2:118366953..118421654:+	gene1649	gi|426217103|ref|XP_004002793.1|	1345	7e-176	PREDICTED: TIP41-like protein isoform X2 [Ovis aries]	gi|556746009|ref|XM_005968417.1|	2562	0	PREDICTED: Pantholops hodgsonii TIP41, TOR signaling pathway regulator-like (S. cerevisiae) (TIPRL), mRNA	O75663	425	1e-139	TIP41-like protein	.	.	.	.	pfam04176	TIP41	TIP41-like family. The TOR signalling pathway activates a cell-growth program in response to nutrients. TIP41 interacts with TAP42 and negatively regulates the TOR signaling pathway.	GO:0000077|DNA damage checkpoint;GO:0034048|negative regulation of protein phosphatase type 2A activity;	GO:0005737|cytoplasm;GO:0043231|intracellular membrane-bounded organelle;	.	K17607	TIPRL, TIP41; type 2A phosphatase activator TIP41
oar_circ_0000253	0	0	3	0.909457	0	3	0	-0.256089	0.872264	NA	down	no	NC_019458.2:118366953..118425128:+	gene1649	gi|426217103|ref|XP_004002793.1|	1345	7e-176	PREDICTED: TIP41-like protein isoform X2 [Ovis aries]	gi|556746009|ref|XM_005968417.1|	2562	0	PREDICTED: Pantholops hodgsonii TIP41, TOR signaling pathway regulator-like (S. cerevisiae) (TIPRL), mRNA	O75663	425	1e-139	TIP41-like protein	.	.	.	.	pfam04176	TIP41	TIP41-like family. The TOR signalling pathway activates a cell-growth program in response to nutrients. TIP41 interacts with TAP42 and negatively regulates the TOR signaling pathway.	GO:0000077|DNA damage checkpoint;GO:0034048|negative regulation of protein phosphatase type 2A activity;	GO:0005737|cytoplasm;GO:0043231|intracellular membrane-bounded organelle;	.	K17607	TIPRL, TIP41; type 2A phosphatase activator TIP41
oar_circ_0000258	0	0	0	0.523184	3	0	0	-1.46707	0.336722	NA	down	no	NC_019458.2:119039215..119045661:+	gene1657	gi|634849330|ref|XP_007939452.1|	973	4e-124	PREDICTED: calcipressin-1 isoform X2 [Orycteropus afer afer]	gi|57164304|ref|NM_001009274.1|	2163	0	Ovis aries regulator of calcineurin 1 (RCAN1), mRNA	Q6XXM7	378	4e-125	Calcipressin-1	.	.	.	.	pfam04847	Calcipressin	Calcipressin. Calcipressin is also known as calcineurin-binding protein, since it inhibits calcineurin-mediated transcriptional modulation by binding to calcineurin's catalytic domain.	GO:0033173|calcineurin-NFAT signaling cascade;	GO:0005622|intracellular;	GO:0000166|nucleotide binding;	K17901	RCAN1, MCIP1; calcipressin-1
oar_circ_0000259	0	3	0	0.389924	0	0	0	1.32957	0.379611	NA	up	no	NC_019458.2:119163910..119169940:-	gene1659	gi|821384213|ref|XP_012394938.1|	223	9e-21	PREDICTED: small integral membrane protein 11 isoform X1 [Orcinus orca]	gi|548448826|ref|XM_005674661.1|	437	0	PREDICTED: Capra hircus small integral membrane protein 11 (SMIM11), mRNA	A6H770	80.1	3e-17	Small integral membrane protein 11A	.	.	.	.	pfam14981	FAM165	FAM165 family. This family of proteins known as FAM165 are found in eukaryotes. Members of this family are as yet uncharacterized. Proteins in this family are typically short membrane proteins between 55 and 70 amino acids in length.	.	GO:0016021|integral component of membrane;	.	.	.
oar_circ_0000261	0	0	0	0.523184	3	0	0	-1.46707	0.336722	NA	down	no	NC_019458.2:119732588..119747733:-	gene1665	gi|802996275|ref|XP_012041514.1|	6393	0	PREDICTED: intersectin-1 isoform X3 [Ovis aries]	gi|594047747|ref|XM_006048226.1|	6421	0	PREDICTED: Bubalus bubalis intersectin 1 (SH3 domain protein) (ITSN1), transcript variant X2, mRNA	Q15811	960	0	Intersectin-1	SPCC645.07	100	4e-20	COG5422	pfam00621	RhoGEF	RhoGEF domain. Guanine nucleotide exchange factor for Rho/Rac/Cdc42-like GTPases Also called Dbl-homologous (DH) domain. It appears that pfam00169 domains invariably occur C-terminal to RhoGEF/DH domains.	GO:0048013|ephrin receptor signaling pathway;GO:0043524|negative regulation of neuron apoptotic process;GO:0043065|positive regulation of apoptotic process;GO:0051897|positive regulation of protein kinase B signaling;GO:0035023|regulation of Rho protein signal transduction;GO:0051056|regulation of small GTPase mediated signal transduction;GO:0007264|small GTPase mediated signal transduction;GO:00…	GO:0030054|cell junction;GO:0005905|coated pit;GO:0005829|cytosol;GO:0030139|endocytic vesicle;GO:0030027|lamellipodium;GO:0043005|neuron projection;GO:0005886|plasma membrane;GO:0045202|synapse;	GO:0005509|calcium ion binding;GO:0005085|guanyl-nucleotide exchange factor activity;GO:0019209|kinase activator activity;GO:0070064|proline-rich region binding;GO:0032947|protein complex scaffold;GO:0005089|Rho guanyl-nucleotide exchange factor activity;	.	.
oar_circ_0000262	0	2	0	0.259949	0	0	0	1.18697	0.42538	NA	up	no	NC_019458.2:119735784..119740156:-	gene1665	gi|802996275|ref|XP_012041514.1|	6393	0	PREDICTED: intersectin-1 isoform X3 [Ovis aries]	gi|594047747|ref|XM_006048226.1|	6421	0	PREDICTED: Bubalus bubalis intersectin 1 (SH3 domain protein) (ITSN1), transcript variant X2, mRNA	Q15811	960	0	Intersectin-1	SPCC645.07	100	4e-20	COG5422	pfam00621	RhoGEF	RhoGEF domain. Guanine nucleotide exchange factor for Rho/Rac/Cdc42-like GTPases Also called Dbl-homologous (DH) domain. It appears that pfam00169 domains invariably occur C-terminal to RhoGEF/DH domains.	GO:0048013|ephrin receptor signaling pathway;GO:0043524|negative regulation of neuron apoptotic process;GO:0043065|positive regulation of apoptotic process;GO:0051897|positive regulation of protein kinase B signaling;GO:0035023|regulation of Rho protein signal transduction;GO:0051056|regulation of small GTPase mediated signal transduction;GO:0007264|small GTPase mediated signal transduction;GO:00…	GO:0030054|cell junction;GO:0005905|coated pit;GO:0005829|cytosol;GO:0030139|endocytic vesicle;GO:0030027|lamellipodium;GO:0043005|neuron projection;GO:0005886|plasma membrane;GO:0045202|synapse;	GO:0005509|calcium ion binding;GO:0005085|guanyl-nucleotide exchange factor activity;GO:0019209|kinase activator activity;GO:0070064|proline-rich region binding;GO:0032947|protein complex scaffold;GO:0005089|Rho guanyl-nucleotide exchange factor activity;	.	.
oar_circ_0000263	0	6	6	3.78605	11	0	2	-0.437961	0.731776	0.999963	down	no	NC_019458.2:119735784..119749866:-	gene1665	gi|802996275|ref|XP_012041514.1|	6393	0	PREDICTED: intersectin-1 isoform X3 [Ovis aries]	gi|594047747|ref|XM_006048226.1|	6421	0	PREDICTED: Bubalus bubalis intersectin 1 (SH3 domain protein) (ITSN1), transcript variant X2, mRNA	Q15811	960	0	Intersectin-1	SPCC645.07	100	4e-20	COG5422	pfam00621	RhoGEF	RhoGEF domain. Guanine nucleotide exchange factor for Rho/Rac/Cdc42-like GTPases Also called Dbl-homologous (DH) domain. It appears that pfam00169 domains invariably occur C-terminal to RhoGEF/DH domains.	GO:0048013|ephrin receptor signaling pathway;GO:0043524|negative regulation of neuron apoptotic process;GO:0043065|positive regulation of apoptotic process;GO:0051897|positive regulation of protein kinase B signaling;GO:0035023|regulation of Rho protein signal transduction;GO:0051056|regulation of small GTPase mediated signal transduction;GO:0007264|small GTPase mediated signal transduction;GO:00…	GO:0030054|cell junction;GO:0005905|coated pit;GO:0005829|cytosol;GO:0030139|endocytic vesicle;GO:0030027|lamellipodium;GO:0043005|neuron projection;GO:0005886|plasma membrane;GO:0045202|synapse;	GO:0005509|calcium ion binding;GO:0005085|guanyl-nucleotide exchange factor activity;GO:0019209|kinase activator activity;GO:0070064|proline-rich region binding;GO:0032947|protein complex scaffold;GO:0005089|Rho guanyl-nucleotide exchange factor activity;	.	.
oar_circ_0000264	0	0	2	0.244763	0	0	0	1.16974	0.431077	NA	up	no	NC_019458.2:119739989..119749866:-	gene1665	gi|802996275|ref|XP_012041514.1|	6393	0	PREDICTED: intersectin-1 isoform X3 [Ovis aries]	gi|594047747|ref|XM_006048226.1|	6421	0	PREDICTED: Bubalus bubalis intersectin 1 (SH3 domain protein) (ITSN1), transcript variant X2, mRNA	Q15811	960	0	Intersectin-1	SPCC645.07	100	4e-20	COG5422	pfam00621	RhoGEF	RhoGEF domain. Guanine nucleotide exchange factor for Rho/Rac/Cdc42-like GTPases Also called Dbl-homologous (DH) domain. It appears that pfam00169 domains invariably occur C-terminal to RhoGEF/DH domains.	GO:0048013|ephrin receptor signaling pathway;GO:0043524|negative regulation of neuron apoptotic process;GO:0043065|positive regulation of apoptotic process;GO:0051897|positive regulation of protein kinase B signaling;GO:0035023|regulation of Rho protein signal transduction;GO:0051056|regulation of small GTPase mediated signal transduction;GO:0007264|small GTPase mediated signal transduction;GO:00…	GO:0030054|cell junction;GO:0005905|coated pit;GO:0005829|cytosol;GO:0030139|endocytic vesicle;GO:0030027|lamellipodium;GO:0043005|neuron projection;GO:0005886|plasma membrane;GO:0045202|synapse;	GO:0005509|calcium ion binding;GO:0005085|guanyl-nucleotide exchange factor activity;GO:0019209|kinase activator activity;GO:0070064|proline-rich region binding;GO:0032947|protein complex scaffold;GO:0005089|Rho guanyl-nucleotide exchange factor activity;	.	.
oar_circ_0000265	0	0	4	1.55343	2	2	2	-0.717088	0.628808	NA	down	no	NC_019458.2:119747635..119758520:-	gene1665	gi|802996275|ref|XP_012041514.1|	6393	0	PREDICTED: intersectin-1 isoform X3 [Ovis aries]	gi|594047747|ref|XM_006048226.1|	6421	0	PREDICTED: Bubalus bubalis intersectin 1 (SH3 domain protein) (ITSN1), transcript variant X2, mRNA	Q15811	960	0	Intersectin-1	SPCC645.07	100	4e-20	COG5422	pfam00621	RhoGEF	RhoGEF domain. Guanine nucleotide exchange factor for Rho/Rac/Cdc42-like GTPases Also called Dbl-homologous (DH) domain. It appears that pfam00169 domains invariably occur C-terminal to RhoGEF/DH domains.	GO:0048013|ephrin receptor signaling pathway;GO:0043524|negative regulation of neuron apoptotic process;GO:0043065|positive regulation of apoptotic process;GO:0051897|positive regulation of protein kinase B signaling;GO:0035023|regulation of Rho protein signal transduction;GO:0051056|regulation of small GTPase mediated signal transduction;GO:0007264|small GTPase mediated signal transduction;GO:00…	GO:0030054|cell junction;GO:0005905|coated pit;GO:0005829|cytosol;GO:0030139|endocytic vesicle;GO:0030027|lamellipodium;GO:0043005|neuron projection;GO:0005886|plasma membrane;GO:0045202|synapse;	GO:0005509|calcium ion binding;GO:0005085|guanyl-nucleotide exchange factor activity;GO:0019209|kinase activator activity;GO:0070064|proline-rich region binding;GO:0032947|protein complex scaffold;GO:0005089|Rho guanyl-nucleotide exchange factor activity;	.	.
oar_circ_0000268	0	0	0	0.523184	3	0	0	-1.46707	0.336722	NA	down	no	NC_019458.2:119756496..119788735:-	gene1665	gi|802996275|ref|XP_012041514.1|	6393	0	PREDICTED: intersectin-1 isoform X3 [Ovis aries]	gi|594047747|ref|XM_006048226.1|	6421	0	PREDICTED: Bubalus bubalis intersectin 1 (SH3 domain protein) (ITSN1), transcript variant X2, mRNA	Q15811	960	0	Intersectin-1	SPCC645.07	100	4e-20	COG5422	pfam00621	RhoGEF	RhoGEF domain. Guanine nucleotide exchange factor for Rho/Rac/Cdc42-like GTPases Also called Dbl-homologous (DH) domain. It appears that pfam00169 domains invariably occur C-terminal to RhoGEF/DH domains.	GO:0048013|ephrin receptor signaling pathway;GO:0043524|negative regulation of neuron apoptotic process;GO:0043065|positive regulation of apoptotic process;GO:0051897|positive regulation of protein kinase B signaling;GO:0035023|regulation of Rho protein signal transduction;GO:0051056|regulation of small GTPase mediated signal transduction;GO:0007264|small GTPase mediated signal transduction;GO:00…	GO:0030054|cell junction;GO:0005905|coated pit;GO:0005829|cytosol;GO:0030139|endocytic vesicle;GO:0030027|lamellipodium;GO:0043005|neuron projection;GO:0005886|plasma membrane;GO:0045202|synapse;	GO:0005509|calcium ion binding;GO:0005085|guanyl-nucleotide exchange factor activity;GO:0019209|kinase activator activity;GO:0070064|proline-rich region binding;GO:0032947|protein complex scaffold;GO:0005089|Rho guanyl-nucleotide exchange factor activity;	.	.
oar_circ_0000270	2	0	0	0.426371	0	0	0	1.32953	0.379624	NA	up	no	NC_019458.2:119815158..119820344:-	gene1665	gi|802996275|ref|XP_012041514.1|	6393	0	PREDICTED: intersectin-1 isoform X3 [Ovis aries]	gi|594047747|ref|XM_006048226.1|	6421	0	PREDICTED: Bubalus bubalis intersectin 1 (SH3 domain protein) (ITSN1), transcript variant X2, mRNA	Q15811	960	0	Intersectin-1	SPCC645.07	100	4e-20	COG5422	pfam00621	RhoGEF	RhoGEF domain. Guanine nucleotide exchange factor for Rho/Rac/Cdc42-like GTPases Also called Dbl-homologous (DH) domain. It appears that pfam00169 domains invariably occur C-terminal to RhoGEF/DH domains.	GO:0048013|ephrin receptor signaling pathway;GO:0043524|negative regulation of neuron apoptotic process;GO:0043065|positive regulation of apoptotic process;GO:0051897|positive regulation of protein kinase B signaling;GO:0035023|regulation of Rho protein signal transduction;GO:0051056|regulation of small GTPase mediated signal transduction;GO:0007264|small GTPase mediated signal transduction;GO:00…	GO:0030054|cell junction;GO:0005905|coated pit;GO:0005829|cytosol;GO:0030139|endocytic vesicle;GO:0030027|lamellipodium;GO:0043005|neuron projection;GO:0005886|plasma membrane;GO:0045202|synapse;	GO:0005509|calcium ion binding;GO:0005085|guanyl-nucleotide exchange factor activity;GO:0019209|kinase activator activity;GO:0070064|proline-rich region binding;GO:0032947|protein complex scaffold;GO:0005089|Rho guanyl-nucleotide exchange factor activity;	.	.
oar_circ_0000272	0	0	4	0.838315	2	0	0	0.252351	0.874039	NA	up	no	NC_019458.2:119820217..119839127:-	gene1665	gi|802996275|ref|XP_012041514.1|	6393	0	PREDICTED: intersectin-1 isoform X3 [Ovis aries]	gi|594047747|ref|XM_006048226.1|	6421	0	PREDICTED: Bubalus bubalis intersectin 1 (SH3 domain protein) (ITSN1), transcript variant X2, mRNA	Q15811	960	0	Intersectin-1	SPCC645.07	100	4e-20	COG5422	pfam00621	RhoGEF	RhoGEF domain. Guanine nucleotide exchange factor for Rho/Rac/Cdc42-like GTPases Also called Dbl-homologous (DH) domain. It appears that pfam00169 domains invariably occur C-terminal to RhoGEF/DH domains.	GO:0048013|ephrin receptor signaling pathway;GO:0043524|negative regulation of neuron apoptotic process;GO:0043065|positive regulation of apoptotic process;GO:0051897|positive regulation of protein kinase B signaling;GO:0035023|regulation of Rho protein signal transduction;GO:0051056|regulation of small GTPase mediated signal transduction;GO:0007264|small GTPase mediated signal transduction;GO:00…	GO:0030054|cell junction;GO:0005905|coated pit;GO:0005829|cytosol;GO:0030139|endocytic vesicle;GO:0030027|lamellipodium;GO:0043005|neuron projection;GO:0005886|plasma membrane;GO:0045202|synapse;	GO:0005509|calcium ion binding;GO:0005085|guanyl-nucleotide exchange factor activity;GO:0019209|kinase activator activity;GO:0070064|proline-rich region binding;GO:0032947|protein complex scaffold;GO:0005089|Rho guanyl-nucleotide exchange factor activity;	.	.
oar_circ_0000274	2	5	0	1.59943	3	0	0	0.659737	0.665076	NA	up	no	NC_019458.2:119820217..119847019:-	gene1665	gi|802996275|ref|XP_012041514.1|	6393	0	PREDICTED: intersectin-1 isoform X3 [Ovis aries]	gi|594047747|ref|XM_006048226.1|	6421	0	PREDICTED: Bubalus bubalis intersectin 1 (SH3 domain protein) (ITSN1), transcript variant X2, mRNA	Q15811	960	0	Intersectin-1	SPCC645.07	100	4e-20	COG5422	pfam00621	RhoGEF	RhoGEF domain. Guanine nucleotide exchange factor for Rho/Rac/Cdc42-like GTPases Also called Dbl-homologous (DH) domain. It appears that pfam00169 domains invariably occur C-terminal to RhoGEF/DH domains.	GO:0048013|ephrin receptor signaling pathway;GO:0043524|negative regulation of neuron apoptotic process;GO:0043065|positive regulation of apoptotic process;GO:0051897|positive regulation of protein kinase B signaling;GO:0035023|regulation of Rho protein signal transduction;GO:0051056|regulation of small GTPase mediated signal transduction;GO:0007264|small GTPase mediated signal transduction;GO:00…	GO:0030054|cell junction;GO:0005905|coated pit;GO:0005829|cytosol;GO:0030139|endocytic vesicle;GO:0030027|lamellipodium;GO:0043005|neuron projection;GO:0005886|plasma membrane;GO:0045202|synapse;	GO:0005509|calcium ion binding;GO:0005085|guanyl-nucleotide exchange factor activity;GO:0019209|kinase activator activity;GO:0070064|proline-rich region binding;GO:0032947|protein complex scaffold;GO:0005089|Rho guanyl-nucleotide exchange factor activity;	.	.
oar_circ_0000277	0	0	0	0.361542	0	2	0	-1.3392	0.374749	NA	down	no	NC_019458.2:119846644..119897057:-	gene1665	gi|802996275|ref|XP_012041514.1|	6393	0	PREDICTED: intersectin-1 isoform X3 [Ovis aries]	gi|594047747|ref|XM_006048226.1|	6421	0	PREDICTED: Bubalus bubalis intersectin 1 (SH3 domain protein) (ITSN1), transcript variant X2, mRNA	Q15811	960	0	Intersectin-1	SPCC645.07	100	4e-20	COG5422	pfam00621	RhoGEF	RhoGEF domain. Guanine nucleotide exchange factor for Rho/Rac/Cdc42-like GTPases Also called Dbl-homologous (DH) domain. It appears that pfam00169 domains invariably occur C-terminal to RhoGEF/DH domains.	GO:0048013|ephrin receptor signaling pathway;GO:0043524|negative regulation of neuron apoptotic process;GO:0043065|positive regulation of apoptotic process;GO:0051897|positive regulation of protein kinase B signaling;GO:0035023|regulation of Rho protein signal transduction;GO:0051056|regulation of small GTPase mediated signal transduction;GO:0007264|small GTPase mediated signal transduction;GO:00…	GO:0030054|cell junction;GO:0005905|coated pit;GO:0005829|cytosol;GO:0030139|endocytic vesicle;GO:0030027|lamellipodium;GO:0043005|neuron projection;GO:0005886|plasma membrane;GO:0045202|synapse;	GO:0005509|calcium ion binding;GO:0005085|guanyl-nucleotide exchange factor activity;GO:0019209|kinase activator activity;GO:0070064|proline-rich region binding;GO:0032947|protein complex scaffold;GO:0005089|Rho guanyl-nucleotide exchange factor activity;	.	.
oar_circ_0000279	0	0	3	0.897505	0	0	3	-0.241369	0.879546	NA	down	no	NC_019458.2:119854229..119870732:-	gene1665	gi|802996275|ref|XP_012041514.1|	6393	0	PREDICTED: intersectin-1 isoform X3 [Ovis aries]	gi|594047747|ref|XM_006048226.1|	6421	0	PREDICTED: Bubalus bubalis intersectin 1 (SH3 domain protein) (ITSN1), transcript variant X2, mRNA	Q15811	960	0	Intersectin-1	SPCC645.07	100	4e-20	COG5422	pfam00621	RhoGEF	RhoGEF domain. Guanine nucleotide exchange factor for Rho/Rac/Cdc42-like GTPases Also called Dbl-homologous (DH) domain. It appears that pfam00169 domains invariably occur C-terminal to RhoGEF/DH domains.	GO:0048013|ephrin receptor signaling pathway;GO:0043524|negative regulation of neuron apoptotic process;GO:0043065|positive regulation of apoptotic process;GO:0051897|positive regulation of protein kinase B signaling;GO:0035023|regulation of Rho protein signal transduction;GO:0051056|regulation of small GTPase mediated signal transduction;GO:0007264|small GTPase mediated signal transduction;GO:00…	GO:0030054|cell junction;GO:0005905|coated pit;GO:0005829|cytosol;GO:0030139|endocytic vesicle;GO:0030027|lamellipodium;GO:0043005|neuron projection;GO:0005886|plasma membrane;GO:0045202|synapse;	GO:0005509|calcium ion binding;GO:0005085|guanyl-nucleotide exchange factor activity;GO:0019209|kinase activator activity;GO:0070064|proline-rich region binding;GO:0032947|protein complex scaffold;GO:0005089|Rho guanyl-nucleotide exchange factor activity;	.	.
oar_circ_0000281	0	0	5	0.611906	0	0	0	1.51907	0.323658	NA	up	no	NC_019458.2:119880311..119897057:-	gene1665	gi|802996275|ref|XP_012041514.1|	6393	0	PREDICTED: intersectin-1 isoform X3 [Ovis aries]	gi|594047747|ref|XM_006048226.1|	6421	0	PREDICTED: Bubalus bubalis intersectin 1 (SH3 domain protein) (ITSN1), transcript variant X2, mRNA	Q15811	960	0	Intersectin-1	SPCC645.07	100	4e-20	COG5422	pfam00621	RhoGEF	RhoGEF domain. Guanine nucleotide exchange factor for Rho/Rac/Cdc42-like GTPases Also called Dbl-homologous (DH) domain. It appears that pfam00169 domains invariably occur C-terminal to RhoGEF/DH domains.	GO:0048013|ephrin receptor signaling pathway;GO:0043524|negative regulation of neuron apoptotic process;GO:0043065|positive regulation of apoptotic process;GO:0051897|positive regulation of protein kinase B signaling;GO:0035023|regulation of Rho protein signal transduction;GO:0051056|regulation of small GTPase mediated signal transduction;GO:0007264|small GTPase mediated signal transduction;GO:00…	GO:0030054|cell junction;GO:0005905|coated pit;GO:0005829|cytosol;GO:0030139|endocytic vesicle;GO:0030027|lamellipodium;GO:0043005|neuron projection;GO:0005886|plasma membrane;GO:0045202|synapse;	GO:0005509|calcium ion binding;GO:0005085|guanyl-nucleotide exchange factor activity;GO:0019209|kinase activator activity;GO:0070064|proline-rich region binding;GO:0032947|protein complex scaffold;GO:0005089|Rho guanyl-nucleotide exchange factor activity;	.	.
oar_circ_0000282	0	0	4	2.97729	3	5	6	-1.75172	0.182866	0.999963	down	no	NC_019458.2:119893624..119897057:-	gene1665	gi|802996275|ref|XP_012041514.1|	6393	0	PREDICTED: intersectin-1 isoform X3 [Ovis aries]	gi|594047747|ref|XM_006048226.1|	6421	0	PREDICTED: Bubalus bubalis intersectin 1 (SH3 domain protein) (ITSN1), transcript variant X2, mRNA	Q15811	960	0	Intersectin-1	SPCC645.07	100	4e-20	COG5422	pfam00621	RhoGEF	RhoGEF domain. Guanine nucleotide exchange factor for Rho/Rac/Cdc42-like GTPases Also called Dbl-homologous (DH) domain. It appears that pfam00169 domains invariably occur C-terminal to RhoGEF/DH domains.	GO:0048013|ephrin receptor signaling pathway;GO:0043524|negative regulation of neuron apoptotic process;GO:0043065|positive regulation of apoptotic process;GO:0051897|positive regulation of protein kinase B signaling;GO:0035023|regulation of Rho protein signal transduction;GO:0051056|regulation of small GTPase mediated signal transduction;GO:0007264|small GTPase mediated signal transduction;GO:00…	GO:0030054|cell junction;GO:0005905|coated pit;GO:0005829|cytosol;GO:0030139|endocytic vesicle;GO:0030027|lamellipodium;GO:0043005|neuron projection;GO:0005886|plasma membrane;GO:0045202|synapse;	GO:0005509|calcium ion binding;GO:0005085|guanyl-nucleotide exchange factor activity;GO:0019209|kinase activator activity;GO:0070064|proline-rich region binding;GO:0032947|protein complex scaffold;GO:0005089|Rho guanyl-nucleotide exchange factor activity;	.	.
oar_circ_0000283	0	0	5	2.57967	2	7	2	-1.21241	0.3765	0.999963	down	no	NC_019458.2:119986421..119997925:+	gene1666	gi|802996250|ref|XP_012041457.1|	1938	0	PREDICTED: quinone oxidoreductase-like protein 1 isoform X5 [Ovis aries]	gi|548448878|ref|XM_005674669.1|	1578	0	PREDICTED: Capra hircus crystallin, zeta (quinone reductase)-like 1 (CRYZL1), transcript variant X4, mRNA	Q59A28	603	0	Quinone oxidoreductase-like protein 1	lin0622	77.8	7e-15	COG0604	pfam00107	ADH_zinc_N	Zinc-binding dehydrogenase.	.	GO:0005829|cytosol;	GO:0016491|oxidoreductase activity;GO:0008270|zinc ion binding;	.	.
oar_circ_0000286	0	0	0	1.04637	6	0	0	-2.23265	0.160397	NA	down	no	NC_019458.2:120032051..120032579:-	gene1669	gi|802996287|ref|XP_012041554.1|	7835	0	PREDICTED: LOW QUALITY PROTEIN: protein SON [Ovis aries]	gi|556734394|ref|XM_005962768.1|	7015	0	PREDICTED: Pantholops hodgsonii SON DNA binding protein (SON), transcript variant X2, mRNA	P18583	2374	0	Protein SON	.	.	.	.	pfam14709	DND1_DSRM	double strand RNA binding domain from DEAD END PROTEIN 1. A C-terminal domain in human dead end protein 1 (DND1_HUMAN) homologous to double strand RNA binding domains (PF00035, PF00333)	GO:0000226|microtubule cytoskeleton organization;GO:0000281|mitotic cytokinesis;GO:0006397|mRNA processing;GO:0043066|negative regulation of apoptotic process;GO:0051726|regulation of cell cycle;GO:0048024|regulation of mRNA splicing, via spliceosome;GO:0008380|RNA splicing;	GO:0016607|nuclear speck;GO:0005654|nucleoplasm;GO:0071011|precatalytic spliceosome;	GO:0003677|DNA binding;GO:0003676|nucleic acid binding;GO:0044822|poly(A) RNA binding;GO:0003723|RNA binding;	.	.
oar_circ_0000287	0	2	0	0.802263	0	3	0	-0.478774	0.7634	NA	down	no	NC_019458.2:120032051..120034663:-	gene1669	gi|802996287|ref|XP_012041554.1|	7835	0	PREDICTED: LOW QUALITY PROTEIN: protein SON [Ovis aries]	gi|556734394|ref|XM_005962768.1|	7015	0	PREDICTED: Pantholops hodgsonii SON DNA binding protein (SON), transcript variant X2, mRNA	P18583	2374	0	Protein SON	.	.	.	.	pfam14709	DND1_DSRM	double strand RNA binding domain from DEAD END PROTEIN 1. A C-terminal domain in human dead end protein 1 (DND1_HUMAN) homologous to double strand RNA binding domains (PF00035, PF00333)	GO:0000226|microtubule cytoskeleton organization;GO:0000281|mitotic cytokinesis;GO:0006397|mRNA processing;GO:0043066|negative regulation of apoptotic process;GO:0051726|regulation of cell cycle;GO:0048024|regulation of mRNA splicing, via spliceosome;GO:0008380|RNA splicing;	GO:0016607|nuclear speck;GO:0005654|nucleoplasm;GO:0071011|precatalytic spliceosome;	GO:0003677|DNA binding;GO:0003676|nucleic acid binding;GO:0044822|poly(A) RNA binding;GO:0003723|RNA binding;	.	.
oar_circ_0000289	2	0	0	0.426371	0	0	0	1.32953	0.379624	NA	up	no	NC_019458.2:120050660..120053850:+	gene1670	gi|802996289|ref|XP_012041560.1|	5361	0	PREDICTED: trifunctional purine biosynthetic protein adenosine-3 isoform X1 [Ovis aries]	gi|548448888|ref|XM_005674671.1|	3588	0	PREDICTED: Capra hircus phosphoribosylglycinamide formyltransferase, phosphoribosylglycinamide synthetase, phosphoribosylaminoimidazole synthetase (GART), transcript variant X1, mRNA	Q59A32	1968	0	Trifunctional purine biosynthetic protein adenosine-3	mll7962	402	1e-125	COG0150	pfam01071	GARS_A	Phosphoribosylglycinamide synthetase, ATP-grasp (A) domain. Phosphoribosylglycinamide synthetase catalyses the second step in the de novo biosynthesis of purine. The reaction catalysed by Phosphoribosylglycinamide synthetase is the ATP- dependent addition of 5-phosphoribosylamine to glycine to form 5'phosphoribosylglycinamide. This domain is related to the ATP-grasp domain of biotin carboxylase/c…	GO:0006189|'de novo' IMP biosynthetic process;GO:0009113|purine nucleobase biosynthetic process;	GO:0005737|cytoplasm;GO:0070062|extracellular exosome;	GO:0005524|ATP binding;GO:0046872|metal ion binding;GO:0004637|phosphoribosylamine-glycine ligase activity;GO:0004641|phosphoribosylformylglycinamidine cyclo-ligase activity;GO:0004644|phosphoribosylglycinamide formyltransferase activity;	K11787	GART; phosphoribosylamine--glycine ligase / phosphoribosylglycinamide formyltransferase / phosphoribosylformylglycinamidine cyclo-ligase [EC:6.3.4.13 2.1.2.2 6.3.3.1]
oar_circ_0000290	8	46	67	27.5454	26	14	26	0.4471	0.458751	0.999963	up	no	NC_019458.2:120130161..120133728:+	gene1673	gi|8659559|ref|NP_006125.2|	836	1e-104	transmembrane protein 50B [Homo sapiens]	gi|594047778|ref|XM_006048241.1|	1870	0	PREDICTED: Bubalus bubalis transmembrane protein 50B (TMEM50B), mRNA	Q5R4C3	326	5e-106	Transmembrane protein 50B	.	.	.	.	pfam05255	UPF0220	Uncharacterized protein family (UPF0220). This family of proteins is functionally uncharacterized.	.	GO:0016021|integral component of membrane;	.	.	.
oar_circ_0000291	0	2	6	2.25167	0	5	2	-0.213202	0.87912	0.999963	down	no	NC_019458.2:120130161..120142832:+	gene1673	gi|8659559|ref|NP_006125.2|	836	1e-104	transmembrane protein 50B [Homo sapiens]	gi|594047778|ref|XM_006048241.1|	1870	0	PREDICTED: Bubalus bubalis transmembrane protein 50B (TMEM50B), mRNA	Q5R4C3	326	5e-106	Transmembrane protein 50B	.	.	.	.	pfam05255	UPF0220	Uncharacterized protein family (UPF0220). This family of proteins is functionally uncharacterized.	.	GO:0016021|integral component of membrane;	.	.	.
oar_circ_0000292	2	0	4	2.16216	3	4	0	-0.335523	0.812048	0.999963	down	no	NC_019458.2:120130161..120145661:+	gene1673	gi|8659559|ref|NP_006125.2|	836	1e-104	transmembrane protein 50B [Homo sapiens]	gi|594047778|ref|XM_006048241.1|	1870	0	PREDICTED: Bubalus bubalis transmembrane protein 50B (TMEM50B), mRNA	Q5R4C3	326	5e-106	Transmembrane protein 50B	.	.	.	.	pfam05255	UPF0220	Uncharacterized protein family (UPF0220). This family of proteins is functionally uncharacterized.	.	GO:0016021|integral component of membrane;	.	.	.
oar_circ_0000294	7	31	31	22.2598	22	23	28	-0.434672	0.459103	0.999963	down	no	NC_019458.2:120271792..120276292:-	gene1675	gi|57619263|ref|NP_001009748.1|	1778	0	interferon alpha/beta receptor 1 precursor [Ovis aries]	gi|57619262|ref|NM_001009748.1|	4780	0	Ovis aries interferon (alpha, beta and omega) receptor 1 (IFNAR1), mRNA	Q28589	688	0	Interferon alpha/beta receptor 1	.	.	.	.	pfam09294	Interfer-bind	Interferon-alpha/beta receptor, fibronectin type III. Members of this family adopt a secondary structure consisting of seven beta-strands arranged in an immunoglobulin-like beta-sandwich, in a Greek-key topology. They are required for binding to interferon-alpha.	GO:0035457|cellular response to interferon-alpha;GO:0032496|response to lipopolysaccharide;GO:0060337|type I interferon signaling pathway;	GO:0005887|integral component of plasma membrane;GO:0005770|late endosome;GO:0005764|lysosome;	GO:0019962|type I interferon binding;GO:0004905|type I interferon receptor activity;	.	.
oar_circ_0000295	0	0	0	0.530361	0	0	3	-1.47083	0.335636	NA	down	no	NC_019458.2:120271792..120283043:-	gene1675	gi|57619263|ref|NP_001009748.1|	1778	0	interferon alpha/beta receptor 1 precursor [Ovis aries]	gi|57619262|ref|NM_001009748.1|	4780	0	Ovis aries interferon (alpha, beta and omega) receptor 1 (IFNAR1), mRNA	Q28589	688	0	Interferon alpha/beta receptor 1	.	.	.	.	pfam09294	Interfer-bind	Interferon-alpha/beta receptor, fibronectin type III. Members of this family adopt a secondary structure consisting of seven beta-strands arranged in an immunoglobulin-like beta-sandwich, in a Greek-key topology. They are required for binding to interferon-alpha.	GO:0035457|cellular response to interferon-alpha;GO:0032496|response to lipopolysaccharide;GO:0060337|type I interferon signaling pathway;	GO:0005887|integral component of plasma membrane;GO:0005770|late endosome;GO:0005764|lysosome;	GO:0019962|type I interferon binding;GO:0004905|type I interferon receptor activity;	.	.
oar_circ_0000297	0	0	6	0.734288	0	0	0	1.72615	0.269791	NA	up	no	NC_019458.2:120404197..120415141:-	gene1677	gi|57164351|ref|NP_001009342.1|	2634	0	interferon alpha/beta receptor 2 precursor [Ovis aries]	gi|57164350|ref|NM_001009342.1|	2260	0	Ovis aries interferon (alpha, beta and omega) receptor 2 (IFNAR2), mRNA	Q95207	1019	0	Interferon alpha/beta receptor 2	.	.	.	.	pfam01108	Tissue_fac	Tissue factor. This family is found in metazoa, and is very similar to the fibronectin type III domain. The family is found in cytokine receptors, interleukin and interferon receptors and coagulation factor III proteins. It occurs multiple times, as does fn3, family pfam00041.	GO:0051607|defense response to virus;GO:0035455|response to interferon-alpha;GO:0035456|response to interferon-beta;GO:0060337|type I interferon signaling pathway;	GO:0005887|integral component of plasma membrane;	GO:0004905|type I interferon receptor activity;	K05131	IFNAR2; interferon receptor 2
oar_circ_0000298	0	3	0	0.743497	0	0	2	0.0788552	0.960378	NA	up	no	NC_019458.2:120408122..120415141:-	gene1677	gi|57164351|ref|NP_001009342.1|	2634	0	interferon alpha/beta receptor 2 precursor [Ovis aries]	gi|57164350|ref|NM_001009342.1|	2260	0	Ovis aries interferon (alpha, beta and omega) receptor 2 (IFNAR2), mRNA	Q95207	1019	0	Interferon alpha/beta receptor 2	.	.	.	.	pfam01108	Tissue_fac	Tissue factor. This family is found in metazoa, and is very similar to the fibronectin type III domain. The family is found in cytokine receptors, interleukin and interferon receptors and coagulation factor III proteins. It occurs multiple times, as does fn3, family pfam00041.	GO:0051607|defense response to virus;GO:0035455|response to interferon-alpha;GO:0035456|response to interferon-beta;GO:0060337|type I interferon signaling pathway;	GO:0005887|integral component of plasma membrane;	GO:0004905|type I interferon receptor activity;	K05131	IFNAR2; interferon receptor 2
oar_circ_0000300	0	0	4	0.489525	0	0	0	1.40878	0.355303	NA	up	no	NC_019458.2:120895937..120899468:+	gene1682	gi|426217145|ref|XP_004002814.1|	3888	0	PREDICTED: PAX3- and PAX7-binding protein 1 isoform X1 [Ovis aries]	gi|548449275|ref|XM_005674743.1|	4097	0	PREDICTED: Capra hircus PAX3 and PAX7 binding protein 1 (PAXBP1), mRNA	Q9Y5B6	1438	0	PAX3- and PAX7-binding protein 1	.	.	.	.	pfam07842	GCFC	GC-rich sequence DNA-binding factor-like protein. Sequences found in this family are similar to a region of a human GC-rich sequence DNA-binding factor homolog. This is thought to be a protein involved in transcriptional regulation due to partial homologies to a transcription repressor and histone-interacting protein. This family also contains tuftelin interacting protein 11 which has been identi…	GO:0007517|muscle organ development;GO:0031062|positive regulation of histone methylation;GO:2000288|positive regulation of myoblast proliferation;GO:0045944|positive regulation of transcription from RNA polymerase II promoter;GO:0014842|regulation of satellite cell proliferation;GO:0006351|transcription, DNA-templated;	GO:0005829|cytosol;GO:0005634|nucleus;	GO:0000978|RNA polymerase II core promoter proximal region sequence-specific DNA binding;GO:0003700|transcription factor activity, sequence-specific DNA binding;	K13211	GCFC; GC-rich sequence DNA-binding factor
oar_circ_0000302	0	0	2	0.244763	0	0	0	1.16974	0.431077	NA	up	no	NC_019458.2:120960733..120972488:+	gene1683	gi|802996322|ref|XP_012041707.1|	7374	0	PREDICTED: LOW QUALITY PROTEIN: synaptojanin-1 isoform X1 [Ovis aries]	gi|548448986|ref|XM_005674687.1|	5017	0	PREDICTED: Capra hircus synaptojanin 1 (SYNJ1), transcript variant X1, mRNA	O43426	2572	0	Synaptojanin-1	YNL106c_2	237	2e-64	COG5411	pfam02383	Syja_N	SacI homology domain. This Pfam family represents a protein domain which shows homology to the yeast protein SacI. The SacI homology domain is most notably found at the amino terminal of the inositol 5'-phosphatase synaptojanin.	GO:0046855|inositol phosphate dephosphorylation;GO:0043647|inositol phosphate metabolic process;GO:0007612|learning;GO:0006836|neurotransmitter transport;GO:0006661|phosphatidylinositol biosynthetic process;GO:0046856|phosphatidylinositol dephosphorylation;GO:0046488|phosphatidylinositol metabolic process;GO:0048488|synaptic vesicle endocytosis;GO:0016082|synaptic vesicle priming;GO:0048489|synap…	GO:0030132|clathrin coat of coated pit;GO:0005829|cytosol;GO:0030117|membrane coat;GO:0098793|presynapse;GO:0097060|synaptic membrane;GO:0043195|terminal bouton;GO:0012506|vesicle membrane;	GO:0052659|inositol-1,3,4,5-tetrakisphosphate 5-phosphatase activity;GO:0052658|inositol-1,4,5-trisphosphate 5-phosphatase activity;GO:0000166|nucleotide binding;GO:0034596|phosphatidylinositol phosphate 4-phosphatase activity;GO:0034595|phosphatidylinositol phosphate 5-phosphatase activity;GO:0052629|phosphatidylinositol-3,5-bisphosphate 3-phosphatase activity;GO:0043813|phosphatidylinositol-3,5…	.	.
oar_circ_0000303	2	0	0	0.426371	0	0	0	1.32953	0.379624	NA	up	no	NC_019458.2:120963577..120974891:+	gene1683	gi|802996322|ref|XP_012041707.1|	7374	0	PREDICTED: LOW QUALITY PROTEIN: synaptojanin-1 isoform X1 [Ovis aries]	gi|548448986|ref|XM_005674687.1|	5017	0	PREDICTED: Capra hircus synaptojanin 1 (SYNJ1), transcript variant X1, mRNA	O43426	2572	0	Synaptojanin-1	YNL106c_2	237	2e-64	COG5411	pfam02383	Syja_N	SacI homology domain. This Pfam family represents a protein domain which shows homology to the yeast protein SacI. The SacI homology domain is most notably found at the amino terminal of the inositol 5'-phosphatase synaptojanin.	GO:0046855|inositol phosphate dephosphorylation;GO:0043647|inositol phosphate metabolic process;GO:0007612|learning;GO:0006836|neurotransmitter transport;GO:0006661|phosphatidylinositol biosynthetic process;GO:0046856|phosphatidylinositol dephosphorylation;GO:0046488|phosphatidylinositol metabolic process;GO:0048488|synaptic vesicle endocytosis;GO:0016082|synaptic vesicle priming;GO:0048489|synap…	GO:0030132|clathrin coat of coated pit;GO:0005829|cytosol;GO:0030117|membrane coat;GO:0098793|presynapse;GO:0097060|synaptic membrane;GO:0043195|terminal bouton;GO:0012506|vesicle membrane;	GO:0052659|inositol-1,3,4,5-tetrakisphosphate 5-phosphatase activity;GO:0052658|inositol-1,4,5-trisphosphate 5-phosphatase activity;GO:0000166|nucleotide binding;GO:0034596|phosphatidylinositol phosphate 4-phosphatase activity;GO:0034595|phosphatidylinositol phosphate 5-phosphatase activity;GO:0052629|phosphatidylinositol-3,5-bisphosphate 3-phosphatase activity;GO:0043813|phosphatidylinositol-3,5…	.	.
oar_circ_0000306	0	0	0	0.542314	0	3	0	-1.47697	0.333866	NA	down	no	NC_019458.2:120966112..120982034:+	gene1683	gi|802996322|ref|XP_012041707.1|	7374	0	PREDICTED: LOW QUALITY PROTEIN: synaptojanin-1 isoform X1 [Ovis aries]	gi|548448986|ref|XM_005674687.1|	5017	0	PREDICTED: Capra hircus synaptojanin 1 (SYNJ1), transcript variant X1, mRNA	O43426	2572	0	Synaptojanin-1	YNL106c_2	237	2e-64	COG5411	pfam02383	Syja_N	SacI homology domain. This Pfam family represents a protein domain which shows homology to the yeast protein SacI. The SacI homology domain is most notably found at the amino terminal of the inositol 5'-phosphatase synaptojanin.	GO:0046855|inositol phosphate dephosphorylation;GO:0043647|inositol phosphate metabolic process;GO:0007612|learning;GO:0006836|neurotransmitter transport;GO:0006661|phosphatidylinositol biosynthetic process;GO:0046856|phosphatidylinositol dephosphorylation;GO:0046488|phosphatidylinositol metabolic process;GO:0048488|synaptic vesicle endocytosis;GO:0016082|synaptic vesicle priming;GO:0048489|synap…	GO:0030132|clathrin coat of coated pit;GO:0005829|cytosol;GO:0030117|membrane coat;GO:0098793|presynapse;GO:0097060|synaptic membrane;GO:0043195|terminal bouton;GO:0012506|vesicle membrane;	GO:0052659|inositol-1,3,4,5-tetrakisphosphate 5-phosphatase activity;GO:0052658|inositol-1,4,5-trisphosphate 5-phosphatase activity;GO:0000166|nucleotide binding;GO:0034596|phosphatidylinositol phosphate 4-phosphatase activity;GO:0034595|phosphatidylinositol phosphate 5-phosphatase activity;GO:0052629|phosphatidylinositol-3,5-bisphosphate 3-phosphatase activity;GO:0043813|phosphatidylinositol-3,5…	.	.
oar_circ_0000307	0	0	0	0.542314	0	3	0	-1.47697	0.333866	NA	down	no	NC_019458.2:120972297..120978075:+	gene1683	gi|802996322|ref|XP_012041707.1|	7374	0	PREDICTED: LOW QUALITY PROTEIN: synaptojanin-1 isoform X1 [Ovis aries]	gi|548448986|ref|XM_005674687.1|	5017	0	PREDICTED: Capra hircus synaptojanin 1 (SYNJ1), transcript variant X1, mRNA	O43426	2572	0	Synaptojanin-1	YNL106c_2	237	2e-64	COG5411	pfam02383	Syja_N	SacI homology domain. This Pfam family represents a protein domain which shows homology to the yeast protein SacI. The SacI homology domain is most notably found at the amino terminal of the inositol 5'-phosphatase synaptojanin.	GO:0046855|inositol phosphate dephosphorylation;GO:0043647|inositol phosphate metabolic process;GO:0007612|learning;GO:0006836|neurotransmitter transport;GO:0006661|phosphatidylinositol biosynthetic process;GO:0046856|phosphatidylinositol dephosphorylation;GO:0046488|phosphatidylinositol metabolic process;GO:0048488|synaptic vesicle endocytosis;GO:0016082|synaptic vesicle priming;GO:0048489|synap…	GO:0030132|clathrin coat of coated pit;GO:0005829|cytosol;GO:0030117|membrane coat;GO:0098793|presynapse;GO:0097060|synaptic membrane;GO:0043195|terminal bouton;GO:0012506|vesicle membrane;	GO:0052659|inositol-1,3,4,5-tetrakisphosphate 5-phosphatase activity;GO:0052658|inositol-1,4,5-trisphosphate 5-phosphatase activity;GO:0000166|nucleotide binding;GO:0034596|phosphatidylinositol phosphate 4-phosphatase activity;GO:0034595|phosphatidylinositol phosphate 5-phosphatase activity;GO:0052629|phosphatidylinositol-3,5-bisphosphate 3-phosphatase activity;GO:0043813|phosphatidylinositol-3,5…	.	.
oar_circ_0000308	0	3	0	0.389924	0	0	0	1.32957	0.379611	NA	up	no	NC_019458.2:120972297..120981018:+	gene1683	gi|802996322|ref|XP_012041707.1|	7374	0	PREDICTED: LOW QUALITY PROTEIN: synaptojanin-1 isoform X1 [Ovis aries]	gi|548448986|ref|XM_005674687.1|	5017	0	PREDICTED: Capra hircus synaptojanin 1 (SYNJ1), transcript variant X1, mRNA	O43426	2572	0	Synaptojanin-1	YNL106c_2	237	2e-64	COG5411	pfam02383	Syja_N	SacI homology domain. This Pfam family represents a protein domain which shows homology to the yeast protein SacI. The SacI homology domain is most notably found at the amino terminal of the inositol 5'-phosphatase synaptojanin.	GO:0046855|inositol phosphate dephosphorylation;GO:0043647|inositol phosphate metabolic process;GO:0007612|learning;GO:0006836|neurotransmitter transport;GO:0006661|phosphatidylinositol biosynthetic process;GO:0046856|phosphatidylinositol dephosphorylation;GO:0046488|phosphatidylinositol metabolic process;GO:0048488|synaptic vesicle endocytosis;GO:0016082|synaptic vesicle priming;GO:0048489|synap…	GO:0030132|clathrin coat of coated pit;GO:0005829|cytosol;GO:0030117|membrane coat;GO:0098793|presynapse;GO:0097060|synaptic membrane;GO:0043195|terminal bouton;GO:0012506|vesicle membrane;	GO:0052659|inositol-1,3,4,5-tetrakisphosphate 5-phosphatase activity;GO:0052658|inositol-1,4,5-trisphosphate 5-phosphatase activity;GO:0000166|nucleotide binding;GO:0034596|phosphatidylinositol phosphate 4-phosphatase activity;GO:0034595|phosphatidylinositol phosphate 5-phosphatase activity;GO:0052629|phosphatidylinositol-3,5-bisphosphate 3-phosphatase activity;GO:0043813|phosphatidylinositol-3,5…	.	.
oar_circ_0000309	3	6	3	2.65852	5	0	0	0.781735	0.563566	0.999963	up	no	NC_019458.2:120972297..120982034:+	gene1683	gi|802996322|ref|XP_012041707.1|	7374	0	PREDICTED: LOW QUALITY PROTEIN: synaptojanin-1 isoform X1 [Ovis aries]	gi|548448986|ref|XM_005674687.1|	5017	0	PREDICTED: Capra hircus synaptojanin 1 (SYNJ1), transcript variant X1, mRNA	O43426	2572	0	Synaptojanin-1	YNL106c_2	237	2e-64	COG5411	pfam02383	Syja_N	SacI homology domain. This Pfam family represents a protein domain which shows homology to the yeast protein SacI. The SacI homology domain is most notably found at the amino terminal of the inositol 5'-phosphatase synaptojanin.	GO:0046855|inositol phosphate dephosphorylation;GO:0043647|inositol phosphate metabolic process;GO:0007612|learning;GO:0006836|neurotransmitter transport;GO:0006661|phosphatidylinositol biosynthetic process;GO:0046856|phosphatidylinositol dephosphorylation;GO:0046488|phosphatidylinositol metabolic process;GO:0048488|synaptic vesicle endocytosis;GO:0016082|synaptic vesicle priming;GO:0048489|synap…	GO:0030132|clathrin coat of coated pit;GO:0005829|cytosol;GO:0030117|membrane coat;GO:0098793|presynapse;GO:0097060|synaptic membrane;GO:0043195|terminal bouton;GO:0012506|vesicle membrane;	GO:0052659|inositol-1,3,4,5-tetrakisphosphate 5-phosphatase activity;GO:0052658|inositol-1,4,5-trisphosphate 5-phosphatase activity;GO:0000166|nucleotide binding;GO:0034596|phosphatidylinositol phosphate 4-phosphatase activity;GO:0034595|phosphatidylinositol phosphate 5-phosphatase activity;GO:0052629|phosphatidylinositol-3,5-bisphosphate 3-phosphatase activity;GO:0043813|phosphatidylinositol-3,5…	.	.
oar_circ_0000310	0	4	0	2.47331	3	4	4	-1.39349	0.307579	0.999963	down	no	NC_019458.2:120972297..120985593:+	gene1683	gi|802996322|ref|XP_012041707.1|	7374	0	PREDICTED: LOW QUALITY PROTEIN: synaptojanin-1 isoform X1 [Ovis aries]	gi|548448986|ref|XM_005674687.1|	5017	0	PREDICTED: Capra hircus synaptojanin 1 (SYNJ1), transcript variant X1, mRNA	O43426	2572	0	Synaptojanin-1	YNL106c_2	237	2e-64	COG5411	pfam02383	Syja_N	SacI homology domain. This Pfam family represents a protein domain which shows homology to the yeast protein SacI. The SacI homology domain is most notably found at the amino terminal of the inositol 5'-phosphatase synaptojanin.	GO:0046855|inositol phosphate dephosphorylation;GO:0043647|inositol phosphate metabolic process;GO:0007612|learning;GO:0006836|neurotransmitter transport;GO:0006661|phosphatidylinositol biosynthetic process;GO:0046856|phosphatidylinositol dephosphorylation;GO:0046488|phosphatidylinositol metabolic process;GO:0048488|synaptic vesicle endocytosis;GO:0016082|synaptic vesicle priming;GO:0048489|synap…	GO:0030132|clathrin coat of coated pit;GO:0005829|cytosol;GO:0030117|membrane coat;GO:0098793|presynapse;GO:0097060|synaptic membrane;GO:0043195|terminal bouton;GO:0012506|vesicle membrane;	GO:0052659|inositol-1,3,4,5-tetrakisphosphate 5-phosphatase activity;GO:0052658|inositol-1,4,5-trisphosphate 5-phosphatase activity;GO:0000166|nucleotide binding;GO:0034596|phosphatidylinositol phosphate 4-phosphatase activity;GO:0034595|phosphatidylinositol phosphate 5-phosphatase activity;GO:0052629|phosphatidylinositol-3,5-bisphosphate 3-phosphatase activity;GO:0043813|phosphatidylinositol-3,5…	.	.
oar_circ_0000311	4	12	10	7.67843	10	0	13	-0.128471	0.896211	0.999963	down	no	NC_019458.2:120972297..120993358:+	gene1683	gi|802996322|ref|XP_012041707.1|	7374	0	PREDICTED: LOW QUALITY PROTEIN: synaptojanin-1 isoform X1 [Ovis aries]	gi|548448986|ref|XM_005674687.1|	5017	0	PREDICTED: Capra hircus synaptojanin 1 (SYNJ1), transcript variant X1, mRNA	O43426	2572	0	Synaptojanin-1	YNL106c_2	237	2e-64	COG5411	pfam02383	Syja_N	SacI homology domain. This Pfam family represents a protein domain which shows homology to the yeast protein SacI. The SacI homology domain is most notably found at the amino terminal of the inositol 5'-phosphatase synaptojanin.	GO:0046855|inositol phosphate dephosphorylation;GO:0043647|inositol phosphate metabolic process;GO:0007612|learning;GO:0006836|neurotransmitter transport;GO:0006661|phosphatidylinositol biosynthetic process;GO:0046856|phosphatidylinositol dephosphorylation;GO:0046488|phosphatidylinositol metabolic process;GO:0048488|synaptic vesicle endocytosis;GO:0016082|synaptic vesicle priming;GO:0048489|synap…	GO:0030132|clathrin coat of coated pit;GO:0005829|cytosol;GO:0030117|membrane coat;GO:0098793|presynapse;GO:0097060|synaptic membrane;GO:0043195|terminal bouton;GO:0012506|vesicle membrane;	GO:0052659|inositol-1,3,4,5-tetrakisphosphate 5-phosphatase activity;GO:0052658|inositol-1,4,5-trisphosphate 5-phosphatase activity;GO:0000166|nucleotide binding;GO:0034596|phosphatidylinositol phosphate 4-phosphatase activity;GO:0034595|phosphatidylinositol phosphate 5-phosphatase activity;GO:0052629|phosphatidylinositol-3,5-bisphosphate 3-phosphatase activity;GO:0043813|phosphatidylinositol-3,5…	.	.
oar_circ_0000312	0	5	5	3.56399	5	4	4	-0.677632	0.564932	0.999963	down	no	NC_019458.2:120980862..120982034:+	gene1683	gi|802996322|ref|XP_012041707.1|	7374	0	PREDICTED: LOW QUALITY PROTEIN: synaptojanin-1 isoform X1 [Ovis aries]	gi|548448986|ref|XM_005674687.1|	5017	0	PREDICTED: Capra hircus synaptojanin 1 (SYNJ1), transcript variant X1, mRNA	O43426	2572	0	Synaptojanin-1	YNL106c_2	237	2e-64	COG5411	pfam02383	Syja_N	SacI homology domain. This Pfam family represents a protein domain which shows homology to the yeast protein SacI. The SacI homology domain is most notably found at the amino terminal of the inositol 5'-phosphatase synaptojanin.	GO:0046855|inositol phosphate dephosphorylation;GO:0043647|inositol phosphate metabolic process;GO:0007612|learning;GO:0006836|neurotransmitter transport;GO:0006661|phosphatidylinositol biosynthetic process;GO:0046856|phosphatidylinositol dephosphorylation;GO:0046488|phosphatidylinositol metabolic process;GO:0048488|synaptic vesicle endocytosis;GO:0016082|synaptic vesicle priming;GO:0048489|synap…	GO:0030132|clathrin coat of coated pit;GO:0005829|cytosol;GO:0030117|membrane coat;GO:0098793|presynapse;GO:0097060|synaptic membrane;GO:0043195|terminal bouton;GO:0012506|vesicle membrane;	GO:0052659|inositol-1,3,4,5-tetrakisphosphate 5-phosphatase activity;GO:0052658|inositol-1,4,5-trisphosphate 5-phosphatase activity;GO:0000166|nucleotide binding;GO:0034596|phosphatidylinositol phosphate 4-phosphatase activity;GO:0034595|phosphatidylinositol phosphate 5-phosphatase activity;GO:0052629|phosphatidylinositol-3,5-bisphosphate 3-phosphatase activity;GO:0043813|phosphatidylinositol-3,5…	.	.
oar_circ_0000313	0	0	2	0.244763	0	0	0	1.16974	0.431077	NA	up	no	NC_019458.2:120980862..120985593:+	gene1683	gi|802996322|ref|XP_012041707.1|	7374	0	PREDICTED: LOW QUALITY PROTEIN: synaptojanin-1 isoform X1 [Ovis aries]	gi|548448986|ref|XM_005674687.1|	5017	0	PREDICTED: Capra hircus synaptojanin 1 (SYNJ1), transcript variant X1, mRNA	O43426	2572	0	Synaptojanin-1	YNL106c_2	237	2e-64	COG5411	pfam02383	Syja_N	SacI homology domain. This Pfam family represents a protein domain which shows homology to the yeast protein SacI. The SacI homology domain is most notably found at the amino terminal of the inositol 5'-phosphatase synaptojanin.	GO:0046855|inositol phosphate dephosphorylation;GO:0043647|inositol phosphate metabolic process;GO:0007612|learning;GO:0006836|neurotransmitter transport;GO:0006661|phosphatidylinositol biosynthetic process;GO:0046856|phosphatidylinositol dephosphorylation;GO:0046488|phosphatidylinositol metabolic process;GO:0048488|synaptic vesicle endocytosis;GO:0016082|synaptic vesicle priming;GO:0048489|synap…	GO:0030132|clathrin coat of coated pit;GO:0005829|cytosol;GO:0030117|membrane coat;GO:0098793|presynapse;GO:0097060|synaptic membrane;GO:0043195|terminal bouton;GO:0012506|vesicle membrane;	GO:0052659|inositol-1,3,4,5-tetrakisphosphate 5-phosphatase activity;GO:0052658|inositol-1,4,5-trisphosphate 5-phosphatase activity;GO:0000166|nucleotide binding;GO:0034596|phosphatidylinositol phosphate 4-phosphatase activity;GO:0034595|phosphatidylinositol phosphate 5-phosphatase activity;GO:0052629|phosphatidylinositol-3,5-bisphosphate 3-phosphatase activity;GO:0043813|phosphatidylinositol-3,5…	.	.
oar_circ_0000315	0	2	2	0.866254	0	2	0	0.28188	0.859176	NA	up	no	NC_019458.2:120987936..120993961:+	gene1683	gi|802996322|ref|XP_012041707.1|	7374	0	PREDICTED: LOW QUALITY PROTEIN: synaptojanin-1 isoform X1 [Ovis aries]	gi|548448986|ref|XM_005674687.1|	5017	0	PREDICTED: Capra hircus synaptojanin 1 (SYNJ1), transcript variant X1, mRNA	O43426	2572	0	Synaptojanin-1	YNL106c_2	237	2e-64	COG5411	pfam02383	Syja_N	SacI homology domain. This Pfam family represents a protein domain which shows homology to the yeast protein SacI. The SacI homology domain is most notably found at the amino terminal of the inositol 5'-phosphatase synaptojanin.	GO:0046855|inositol phosphate dephosphorylation;GO:0043647|inositol phosphate metabolic process;GO:0007612|learning;GO:0006836|neurotransmitter transport;GO:0006661|phosphatidylinositol biosynthetic process;GO:0046856|phosphatidylinositol dephosphorylation;GO:0046488|phosphatidylinositol metabolic process;GO:0048488|synaptic vesicle endocytosis;GO:0016082|synaptic vesicle priming;GO:0048489|synap…	GO:0030132|clathrin coat of coated pit;GO:0005829|cytosol;GO:0030117|membrane coat;GO:0098793|presynapse;GO:0097060|synaptic membrane;GO:0043195|terminal bouton;GO:0012506|vesicle membrane;	GO:0052659|inositol-1,3,4,5-tetrakisphosphate 5-phosphatase activity;GO:0052658|inositol-1,4,5-trisphosphate 5-phosphatase activity;GO:0000166|nucleotide binding;GO:0034596|phosphatidylinositol phosphate 4-phosphatase activity;GO:0034595|phosphatidylinositol phosphate 5-phosphatase activity;GO:0052629|phosphatidylinositol-3,5-bisphosphate 3-phosphatase activity;GO:0043813|phosphatidylinositol-3,5…	.	.
oar_circ_0000316	3	0	2	1.24586	0	2	0	0.746789	0.632311	NA	up	no	NC_019458.2:121084804..121114121:-	gene1686	gi|548449278|ref|XP_005674801.1|	2530	0	PREDICTED: protein eva-1 homolog C-like [Capra hircus]	gi|548449277|ref|XM_005674744.1|	1793	0	PREDICTED: Capra hircus protein eva-1 homolog C-like (LOC102168484), mRNA	P58658	625	0	Protein eva-1 homolog C	.	.	.	.	pfam14851	FAM176	FAM176 family. Members of the FAM176 family regulate autophagy and apoptosis.	.	GO:0016021|integral component of membrane;	GO:0030246|carbohydrate binding;	.	.
oar_circ_0000318	3	0	0	0.639556	0	0	0	1.53345	0.320032	NA	up	no	NC_019458.2:121098238..121123908:-	gene1686	gi|548449278|ref|XP_005674801.1|	2530	0	PREDICTED: protein eva-1 homolog C-like [Capra hircus]	gi|548449277|ref|XM_005674744.1|	1793	0	PREDICTED: Capra hircus protein eva-1 homolog C-like (LOC102168484), mRNA	P58658	625	0	Protein eva-1 homolog C	.	.	.	.	pfam14851	FAM176	FAM176 family. Members of the FAM176 family regulate autophagy and apoptosis.	.	GO:0016021|integral component of membrane;	GO:0030246|carbohydrate binding;	.	.
oar_circ_0000319	4	7	3	4.0903	0	4	7	0.0930717	0.936303	0.999963	up	no	NC_019458.2:121098238..121127228:-	gene1686	gi|548449278|ref|XP_005674801.1|	2530	0	PREDICTED: protein eva-1 homolog C-like [Capra hircus]	gi|548449277|ref|XM_005674744.1|	1793	0	PREDICTED: Capra hircus protein eva-1 homolog C-like (LOC102168484), mRNA	P58658	625	0	Protein eva-1 homolog C	.	.	.	.	pfam14851	FAM176	FAM176 family. Members of the FAM176 family regulate autophagy and apoptosis.	.	GO:0016021|integral component of membrane;	GO:0030246|carbohydrate binding;	.	.
oar_circ_0000320	3	2	11	4.92141	0	6	9	-0.206229	0.855988	0.999963	down	no	NC_019458.2:121113969..121127228:-	gene1686	gi|548449278|ref|XP_005674801.1|	2530	0	PREDICTED: protein eva-1 homolog C-like [Capra hircus]	gi|548449277|ref|XM_005674744.1|	1793	0	PREDICTED: Capra hircus protein eva-1 homolog C-like (LOC102168484), mRNA	P58658	625	0	Protein eva-1 homolog C	.	.	.	.	pfam14851	FAM176	FAM176 family. Members of the FAM176 family regulate autophagy and apoptosis.	.	GO:0016021|integral component of membrane;	GO:0030246|carbohydrate binding;	.	.
oar_circ_0000321	0	5	16	2.60797	0	0	0	3.66316	0.0164887	0.999963	up	yes	NC_019458.2:121123785..121127228:-	gene1686	gi|548449278|ref|XP_005674801.1|	2530	0	PREDICTED: protein eva-1 homolog C-like [Capra hircus]	gi|548449277|ref|XM_005674744.1|	1793	0	PREDICTED: Capra hircus protein eva-1 homolog C-like (LOC102168484), mRNA	P58658	625	0	Protein eva-1 homolog C	.	.	.	.	pfam14851	FAM176	FAM176 family. Members of the FAM176 family regulate autophagy and apoptosis.	.	GO:0016021|integral component of membrane;	GO:0030246|carbohydrate binding;	.	.
oar_circ_0000322	0	0	0	0.353574	0	0	2	-1.33301	0.37664	NA	down	no	NC_019458.2:121123785..121128032:-	gene1686	gi|548449278|ref|XP_005674801.1|	2530	0	PREDICTED: protein eva-1 homolog C-like [Capra hircus]	gi|548449277|ref|XM_005674744.1|	1793	0	PREDICTED: Capra hircus protein eva-1 homolog C-like (LOC102168484), mRNA	P58658	625	0	Protein eva-1 homolog C	.	.	.	.	pfam14851	FAM176	FAM176 family. Members of the FAM176 family regulate autophagy and apoptosis.	.	GO:0016021|integral component of membrane;	GO:0030246|carbohydrate binding;	.	.
oar_circ_0000326	0	0	0	0.353574	0	0	2	-1.33301	0.37664	NA	down	no	NC_019458.2:121629891..121680707:-	gene1692	gi|803261019|ref|XP_011990239.1|	3316	0	PREDICTED: hormonally up-regulated neu tumor-associated kinase isoform X2 [Ovis aries musimon]	gi|528935828|ref|XM_002684590.2|	4004	0	PREDICTED: Bos taurus hormonally up-regulated Neu-associated kinase (HUNK), transcript variant X2, partial mRNA	Q68UT7	1179	0	Hormonally up-regulated neu tumor-associated kinase	.	.	.	.	pfam00069	Pkinase	Protein kinase domain.	GO:0035556|intracellular signal transduction;GO:0006468|protein phosphorylation;	GO:0005737|cytoplasm;GO:0005634|nucleus;	GO:0005524|ATP binding;GO:0004674|protein serine/threonine kinase activity;	K08797	HUNK; hormonally upregulated Neu-associated kinase [EC:2.7.11.1]
oar_circ_0000327	0	0	0	0.542314	0	3	0	-1.47697	0.333866	NA	down	no	NC_019458.2:121637972..121653453:-	gene1692	gi|803261019|ref|XP_011990239.1|	3316	0	PREDICTED: hormonally up-regulated neu tumor-associated kinase isoform X2 [Ovis aries musimon]	gi|528935828|ref|XM_002684590.2|	4004	0	PREDICTED: Bos taurus hormonally up-regulated Neu-associated kinase (HUNK), transcript variant X2, partial mRNA	Q68UT7	1179	0	Hormonally up-regulated neu tumor-associated kinase	.	.	.	.	pfam00069	Pkinase	Protein kinase domain.	GO:0035556|intracellular signal transduction;GO:0006468|protein phosphorylation;	GO:0005737|cytoplasm;GO:0005634|nucleus;	GO:0005524|ATP binding;GO:0004674|protein serine/threonine kinase activity;	K08797	HUNK; hormonally upregulated Neu-associated kinase [EC:2.7.11.1]
oar_circ_0000329	0	0	0	0.353574	0	0	2	-1.33301	0.37664	NA	down	no	NC_019458.2:121646561..121665325:-	gene1692	gi|803261019|ref|XP_011990239.1|	3316	0	PREDICTED: hormonally up-regulated neu tumor-associated kinase isoform X2 [Ovis aries musimon]	gi|528935828|ref|XM_002684590.2|	4004	0	PREDICTED: Bos taurus hormonally up-regulated Neu-associated kinase (HUNK), transcript variant X2, partial mRNA	Q68UT7	1179	0	Hormonally up-regulated neu tumor-associated kinase	.	.	.	.	pfam00069	Pkinase	Protein kinase domain.	GO:0035556|intracellular signal transduction;GO:0006468|protein phosphorylation;	GO:0005737|cytoplasm;GO:0005634|nucleus;	GO:0005524|ATP binding;GO:0004674|protein serine/threonine kinase activity;	K08797	HUNK; hormonally upregulated Neu-associated kinase [EC:2.7.11.1]
oar_circ_0000331	0	4	2	0.764661	0	0	0	1.98891	0.209692	NA	up	no	NC_019458.2:121772118..121792348:-	gene1693	.	.	.	.	.	.	.	.	.	.	.	.	.	.	.	.	pfam00868	Transglut_N	Transglutaminase family.	.	.	.	.	.
oar_circ_0000332	24	35	49	42.9742	52	53	49	-0.785452	0.06829	0.999963	down	no	NC_019458.2:121772118..121793501:-	gene1693	.	.	.	.	.	.	.	.	.	.	.	.	.	.	.	.	pfam00868	Transglut_N	Transglutaminase family.	.	.	.	.	.
oar_circ_0000333	0	0	0	0.348789	2	0	0	-1.32922	0.377798	NA	down	no	NC_019458.2:121772118..121793636:-	gene1693	.	.	.	.	.	.	.	.	.	.	.	.	.	.	.	.	pfam00868	Transglut_N	Transglutaminase family.	.	.	.	.	.
oar_circ_0000336	0	2	0	0.259949	0	0	0	1.18697	0.42538	NA	up	no	NC_019458.2:121791672..121793501:-	gene1693	.	.	.	.	.	.	.	.	.	.	.	.	.	.	.	.	pfam00868	Transglut_N	Transglutaminase family.	.	.	.	.	.
oar_circ_0000337	0	0	5	0.611906	0	0	0	1.51907	0.323658	NA	up	no	NC_019458.2:121804901..121810468:-	Null	.	.	.	.	.	.	.	.	.	.	.	.	.	.	.	.	.	.	.	.	.	.	.	.
oar_circ_0000338	0	0	0	0.361542	0	2	0	-1.3392	0.374749	NA	down	no	NC_019458.2:121890132..121912211:+	gene1695	gi|803261029|ref|XP_011990242.1|	1504	0	PREDICTED: splicing factor, arginine/serine-rich 15 isoform X2 [Ovis aries musimon]	gi|555962669|ref|XM_005893361.1|	3476	0	PREDICTED: Bos mutus SR-related CTD-associated factor 4 (SCAF4), mRNA	O95104	506	7e-151	Splicing factor, arginine/serine-rich 15	.	.	.	.	pfam04818	CTD_bind	RNA polymerase II-binding domain. This domain binds to the phosphorylated C-terminal domain (CTD) of RNA polymerase II.	.	GO:0005654|nucleoplasm;	GO:0000166|nucleotide binding;GO:0044822|poly(A) RNA binding;	K13167	SFRS15, SCAF4; splicing factor, arginine/serine-rich 15
oar_circ_0000339	0	0	3	0.367144	0	0	0	1.3119	0.385146	NA	up	no	NC_019458.2:121899910..121906421:+	gene1695	gi|803261029|ref|XP_011990242.1|	1504	0	PREDICTED: splicing factor, arginine/serine-rich 15 isoform X2 [Ovis aries musimon]	gi|555962669|ref|XM_005893361.1|	3476	0	PREDICTED: Bos mutus SR-related CTD-associated factor 4 (SCAF4), mRNA	O95104	506	7e-151	Splicing factor, arginine/serine-rich 15	.	.	.	.	pfam04818	CTD_bind	RNA polymerase II-binding domain. This domain binds to the phosphorylated C-terminal domain (CTD) of RNA polymerase II.	.	GO:0005654|nucleoplasm;	GO:0000166|nucleotide binding;GO:0044822|poly(A) RNA binding;	K13167	SFRS15, SCAF4; splicing factor, arginine/serine-rich 15
oar_circ_0000341	0	0	3	0.367144	0	0	0	1.3119	0.385146	NA	up	no	NC_019458.2:122365966..122366939:+	gene1701	gi|426217157|ref|XP_004002820.1|	7792	0	PREDICTED: LOW QUALITY PROTEIN: T-lymphoma invasion and metastasis-inducing protein 1 isoform X1 [Ovis aries]	gi|594058941|ref|XM_006053559.1|	6133	0	PREDICTED: Bubalus bubalis T-cell lymphoma invasion and metastasis 1 (TIAM1), transcript variant X2, mRNA	Q13009	2838	0	T-lymphoma invasion and metastasis-inducing protein 1	.	.	.	.	pfam00621	RhoGEF	RhoGEF domain. Guanine nucleotide exchange factor for Rho/Rac/Cdc42-like GTPases Also called Dbl-homologous (DH) domain. It appears that pfam00169 domains invariably occur C-terminal to RhoGEF/DH domains.	GO:0090630|activation of GTPase activity;GO:0006915|apoptotic process;GO:0003300|cardiac muscle hypertrophy;GO:0016477|cell migration;GO:0007160|cell-matrix adhesion;GO:0048013|ephrin receptor signaling pathway;GO:1990138|neuron projection extension;GO:0043065|positive regulation of apoptotic process;GO:0050772|positive regulation of axonogenesis;GO:0030335|positive regulation of cell migration;G…	GO:0044295|axonal growth cone;GO:0044291|cell-cell contact zone;GO:0005911|cell-cell junction;GO:0005829|cytosol;GO:0043197|dendritic spine;GO:0031234|extrinsic component of cytoplasmic side of plasma membrane;GO:0044304|main axon;GO:0005874|microtubule;GO:0043025|neuronal cell body;GO:0005634|nucleus;GO:0005886|plasma membrane;GO:0032587|ruffle membrane;	GO:0005085|guanyl-nucleotide exchange factor activity;GO:0019900|kinase binding;GO:0008289|lipid binding;GO:0030676|Rac guanyl-nucleotide exchange factor activity;GO:0005057|receptor signaling protein activity;GO:0005089|Rho guanyl-nucleotide exchange factor activity;	K05731	TIAM1; T-lymphoma invasion and metastasis-inducing protein 1
oar_circ_0000342	6	0	4	3.00136	2	0	5	0.368489	0.783659	0.999963	up	no	NC_019458.2:122384007..122391521:+	gene1701	gi|426217157|ref|XP_004002820.1|	7792	0	PREDICTED: LOW QUALITY PROTEIN: T-lymphoma invasion and metastasis-inducing protein 1 isoform X1 [Ovis aries]	gi|594058941|ref|XM_006053559.1|	6133	0	PREDICTED: Bubalus bubalis T-cell lymphoma invasion and metastasis 1 (TIAM1), transcript variant X2, mRNA	Q13009	2838	0	T-lymphoma invasion and metastasis-inducing protein 1	.	.	.	.	pfam00621	RhoGEF	RhoGEF domain. Guanine nucleotide exchange factor for Rho/Rac/Cdc42-like GTPases Also called Dbl-homologous (DH) domain. It appears that pfam00169 domains invariably occur C-terminal to RhoGEF/DH domains.	GO:0090630|activation of GTPase activity;GO:0006915|apoptotic process;GO:0003300|cardiac muscle hypertrophy;GO:0016477|cell migration;GO:0007160|cell-matrix adhesion;GO:0048013|ephrin receptor signaling pathway;GO:1990138|neuron projection extension;GO:0043065|positive regulation of apoptotic process;GO:0050772|positive regulation of axonogenesis;GO:0030335|positive regulation of cell migration;G…	GO:0044295|axonal growth cone;GO:0044291|cell-cell contact zone;GO:0005911|cell-cell junction;GO:0005829|cytosol;GO:0043197|dendritic spine;GO:0031234|extrinsic component of cytoplasmic side of plasma membrane;GO:0044304|main axon;GO:0005874|microtubule;GO:0043025|neuronal cell body;GO:0005634|nucleus;GO:0005886|plasma membrane;GO:0032587|ruffle membrane;	GO:0005085|guanyl-nucleotide exchange factor activity;GO:0019900|kinase binding;GO:0008289|lipid binding;GO:0030676|Rac guanyl-nucleotide exchange factor activity;GO:0005057|receptor signaling protein activity;GO:0005089|Rho guanyl-nucleotide exchange factor activity;	K05731	TIAM1; T-lymphoma invasion and metastasis-inducing protein 1
oar_circ_0000344	0	0	2	0.244763	0	0	0	1.16974	0.431077	NA	up	no	NC_019458.2:122407664..122469757:+	gene1701	gi|426217157|ref|XP_004002820.1|	7792	0	PREDICTED: LOW QUALITY PROTEIN: T-lymphoma invasion and metastasis-inducing protein 1 isoform X1 [Ovis aries]	gi|594058941|ref|XM_006053559.1|	6133	0	PREDICTED: Bubalus bubalis T-cell lymphoma invasion and metastasis 1 (TIAM1), transcript variant X2, mRNA	Q13009	2838	0	T-lymphoma invasion and metastasis-inducing protein 1	.	.	.	.	pfam00621	RhoGEF	RhoGEF domain. Guanine nucleotide exchange factor for Rho/Rac/Cdc42-like GTPases Also called Dbl-homologous (DH) domain. It appears that pfam00169 domains invariably occur C-terminal to RhoGEF/DH domains.	GO:0090630|activation of GTPase activity;GO:0006915|apoptotic process;GO:0003300|cardiac muscle hypertrophy;GO:0016477|cell migration;GO:0007160|cell-matrix adhesion;GO:0048013|ephrin receptor signaling pathway;GO:1990138|neuron projection extension;GO:0043065|positive regulation of apoptotic process;GO:0050772|positive regulation of axonogenesis;GO:0030335|positive regulation of cell migration;G…	GO:0044295|axonal growth cone;GO:0044291|cell-cell contact zone;GO:0005911|cell-cell junction;GO:0005829|cytosol;GO:0043197|dendritic spine;GO:0031234|extrinsic component of cytoplasmic side of plasma membrane;GO:0044304|main axon;GO:0005874|microtubule;GO:0043025|neuronal cell body;GO:0005634|nucleus;GO:0005886|plasma membrane;GO:0032587|ruffle membrane;	GO:0005085|guanyl-nucleotide exchange factor activity;GO:0019900|kinase binding;GO:0008289|lipid binding;GO:0030676|Rac guanyl-nucleotide exchange factor activity;GO:0005057|receptor signaling protein activity;GO:0005089|Rho guanyl-nucleotide exchange factor activity;	K05731	TIAM1; T-lymphoma invasion and metastasis-inducing protein 1
oar_circ_0000345	0	0	2	0.244763	0	0	0	1.16974	0.431077	NA	up	no	NC_019458.2:122410220..122438317:+	gene1701	gi|426217157|ref|XP_004002820.1|	7792	0	PREDICTED: LOW QUALITY PROTEIN: T-lymphoma invasion and metastasis-inducing protein 1 isoform X1 [Ovis aries]	gi|594058941|ref|XM_006053559.1|	6133	0	PREDICTED: Bubalus bubalis T-cell lymphoma invasion and metastasis 1 (TIAM1), transcript variant X2, mRNA	Q13009	2838	0	T-lymphoma invasion and metastasis-inducing protein 1	.	.	.	.	pfam00621	RhoGEF	RhoGEF domain. Guanine nucleotide exchange factor for Rho/Rac/Cdc42-like GTPases Also called Dbl-homologous (DH) domain. It appears that pfam00169 domains invariably occur C-terminal to RhoGEF/DH domains.	GO:0090630|activation of GTPase activity;GO:0006915|apoptotic process;GO:0003300|cardiac muscle hypertrophy;GO:0016477|cell migration;GO:0007160|cell-matrix adhesion;GO:0048013|ephrin receptor signaling pathway;GO:1990138|neuron projection extension;GO:0043065|positive regulation of apoptotic process;GO:0050772|positive regulation of axonogenesis;GO:0030335|positive regulation of cell migration;G…	GO:0044295|axonal growth cone;GO:0044291|cell-cell contact zone;GO:0005911|cell-cell junction;GO:0005829|cytosol;GO:0043197|dendritic spine;GO:0031234|extrinsic component of cytoplasmic side of plasma membrane;GO:0044304|main axon;GO:0005874|microtubule;GO:0043025|neuronal cell body;GO:0005634|nucleus;GO:0005886|plasma membrane;GO:0032587|ruffle membrane;	GO:0005085|guanyl-nucleotide exchange factor activity;GO:0019900|kinase binding;GO:0008289|lipid binding;GO:0030676|Rac guanyl-nucleotide exchange factor activity;GO:0005057|receptor signaling protein activity;GO:0005089|Rho guanyl-nucleotide exchange factor activity;	K05731	TIAM1; T-lymphoma invasion and metastasis-inducing protein 1
oar_circ_0000346	2	0	2	0.671133	0	0	0	1.79682	0.253654	NA	up	no	NC_019458.2:122410220..122446102:+	gene1701	gi|426217157|ref|XP_004002820.1|	7792	0	PREDICTED: LOW QUALITY PROTEIN: T-lymphoma invasion and metastasis-inducing protein 1 isoform X1 [Ovis aries]	gi|594058941|ref|XM_006053559.1|	6133	0	PREDICTED: Bubalus bubalis T-cell lymphoma invasion and metastasis 1 (TIAM1), transcript variant X2, mRNA	Q13009	2838	0	T-lymphoma invasion and metastasis-inducing protein 1	.	.	.	.	pfam00621	RhoGEF	RhoGEF domain. Guanine nucleotide exchange factor for Rho/Rac/Cdc42-like GTPases Also called Dbl-homologous (DH) domain. It appears that pfam00169 domains invariably occur C-terminal to RhoGEF/DH domains.	GO:0090630|activation of GTPase activity;GO:0006915|apoptotic process;GO:0003300|cardiac muscle hypertrophy;GO:0016477|cell migration;GO:0007160|cell-matrix adhesion;GO:0048013|ephrin receptor signaling pathway;GO:1990138|neuron projection extension;GO:0043065|positive regulation of apoptotic process;GO:0050772|positive regulation of axonogenesis;GO:0030335|positive regulation of cell migration;G…	GO:0044295|axonal growth cone;GO:0044291|cell-cell contact zone;GO:0005911|cell-cell junction;GO:0005829|cytosol;GO:0043197|dendritic spine;GO:0031234|extrinsic component of cytoplasmic side of plasma membrane;GO:0044304|main axon;GO:0005874|microtubule;GO:0043025|neuronal cell body;GO:0005634|nucleus;GO:0005886|plasma membrane;GO:0032587|ruffle membrane;	GO:0005085|guanyl-nucleotide exchange factor activity;GO:0019900|kinase binding;GO:0008289|lipid binding;GO:0030676|Rac guanyl-nucleotide exchange factor activity;GO:0005057|receptor signaling protein activity;GO:0005089|Rho guanyl-nucleotide exchange factor activity;	K05731	TIAM1; T-lymphoma invasion and metastasis-inducing protein 1
oar_circ_0000347	0	0	0	0.523184	3	0	0	-1.46707	0.336722	NA	down	no	NC_019458.2:122417412..122438317:+	gene1701	gi|426217157|ref|XP_004002820.1|	7792	0	PREDICTED: LOW QUALITY PROTEIN: T-lymphoma invasion and metastasis-inducing protein 1 isoform X1 [Ovis aries]	gi|594058941|ref|XM_006053559.1|	6133	0	PREDICTED: Bubalus bubalis T-cell lymphoma invasion and metastasis 1 (TIAM1), transcript variant X2, mRNA	Q13009	2838	0	T-lymphoma invasion and metastasis-inducing protein 1	.	.	.	.	pfam00621	RhoGEF	RhoGEF domain. Guanine nucleotide exchange factor for Rho/Rac/Cdc42-like GTPases Also called Dbl-homologous (DH) domain. It appears that pfam00169 domains invariably occur C-terminal to RhoGEF/DH domains.	GO:0090630|activation of GTPase activity;GO:0006915|apoptotic process;GO:0003300|cardiac muscle hypertrophy;GO:0016477|cell migration;GO:0007160|cell-matrix adhesion;GO:0048013|ephrin receptor signaling pathway;GO:1990138|neuron projection extension;GO:0043065|positive regulation of apoptotic process;GO:0050772|positive regulation of axonogenesis;GO:0030335|positive regulation of cell migration;G…	GO:0044295|axonal growth cone;GO:0044291|cell-cell contact zone;GO:0005911|cell-cell junction;GO:0005829|cytosol;GO:0043197|dendritic spine;GO:0031234|extrinsic component of cytoplasmic side of plasma membrane;GO:0044304|main axon;GO:0005874|microtubule;GO:0043025|neuronal cell body;GO:0005634|nucleus;GO:0005886|plasma membrane;GO:0032587|ruffle membrane;	GO:0005085|guanyl-nucleotide exchange factor activity;GO:0019900|kinase binding;GO:0008289|lipid binding;GO:0030676|Rac guanyl-nucleotide exchange factor activity;GO:0005057|receptor signaling protein activity;GO:0005089|Rho guanyl-nucleotide exchange factor activity;	K05731	TIAM1; T-lymphoma invasion and metastasis-inducing protein 1
oar_circ_0000348	0	0	3	0.897505	0	0	3	-0.241369	0.879546	NA	down	no	NC_019458.2:122430867..122452028:+	gene1701	gi|426217157|ref|XP_004002820.1|	7792	0	PREDICTED: LOW QUALITY PROTEIN: T-lymphoma invasion and metastasis-inducing protein 1 isoform X1 [Ovis aries]	gi|594058941|ref|XM_006053559.1|	6133	0	PREDICTED: Bubalus bubalis T-cell lymphoma invasion and metastasis 1 (TIAM1), transcript variant X2, mRNA	Q13009	2838	0	T-lymphoma invasion and metastasis-inducing protein 1	.	.	.	.	pfam00621	RhoGEF	RhoGEF domain. Guanine nucleotide exchange factor for Rho/Rac/Cdc42-like GTPases Also called Dbl-homologous (DH) domain. It appears that pfam00169 domains invariably occur C-terminal to RhoGEF/DH domains.	GO:0090630|activation of GTPase activity;GO:0006915|apoptotic process;GO:0003300|cardiac muscle hypertrophy;GO:0016477|cell migration;GO:0007160|cell-matrix adhesion;GO:0048013|ephrin receptor signaling pathway;GO:1990138|neuron projection extension;GO:0043065|positive regulation of apoptotic process;GO:0050772|positive regulation of axonogenesis;GO:0030335|positive regulation of cell migration;G…	GO:0044295|axonal growth cone;GO:0044291|cell-cell contact zone;GO:0005911|cell-cell junction;GO:0005829|cytosol;GO:0043197|dendritic spine;GO:0031234|extrinsic component of cytoplasmic side of plasma membrane;GO:0044304|main axon;GO:0005874|microtubule;GO:0043025|neuronal cell body;GO:0005634|nucleus;GO:0005886|plasma membrane;GO:0032587|ruffle membrane;	GO:0005085|guanyl-nucleotide exchange factor activity;GO:0019900|kinase binding;GO:0008289|lipid binding;GO:0030676|Rac guanyl-nucleotide exchange factor activity;GO:0005057|receptor signaling protein activity;GO:0005089|Rho guanyl-nucleotide exchange factor activity;	K05731	TIAM1; T-lymphoma invasion and metastasis-inducing protein 1
oar_circ_0000349	0	2	0	0.259949	0	0	0	1.18697	0.42538	NA	up	no	NC_019458.2:122438236..122452028:+	gene1701	gi|426217157|ref|XP_004002820.1|	7792	0	PREDICTED: LOW QUALITY PROTEIN: T-lymphoma invasion and metastasis-inducing protein 1 isoform X1 [Ovis aries]	gi|594058941|ref|XM_006053559.1|	6133	0	PREDICTED: Bubalus bubalis T-cell lymphoma invasion and metastasis 1 (TIAM1), transcript variant X2, mRNA	Q13009	2838	0	T-lymphoma invasion and metastasis-inducing protein 1	.	.	.	.	pfam00621	RhoGEF	RhoGEF domain. Guanine nucleotide exchange factor for Rho/Rac/Cdc42-like GTPases Also called Dbl-homologous (DH) domain. It appears that pfam00169 domains invariably occur C-terminal to RhoGEF/DH domains.	GO:0090630|activation of GTPase activity;GO:0006915|apoptotic process;GO:0003300|cardiac muscle hypertrophy;GO:0016477|cell migration;GO:0007160|cell-matrix adhesion;GO:0048013|ephrin receptor signaling pathway;GO:1990138|neuron projection extension;GO:0043065|positive regulation of apoptotic process;GO:0050772|positive regulation of axonogenesis;GO:0030335|positive regulation of cell migration;G…	GO:0044295|axonal growth cone;GO:0044291|cell-cell contact zone;GO:0005911|cell-cell junction;GO:0005829|cytosol;GO:0043197|dendritic spine;GO:0031234|extrinsic component of cytoplasmic side of plasma membrane;GO:0044304|main axon;GO:0005874|microtubule;GO:0043025|neuronal cell body;GO:0005634|nucleus;GO:0005886|plasma membrane;GO:0032587|ruffle membrane;	GO:0005085|guanyl-nucleotide exchange factor activity;GO:0019900|kinase binding;GO:0008289|lipid binding;GO:0030676|Rac guanyl-nucleotide exchange factor activity;GO:0005057|receptor signaling protein activity;GO:0005089|Rho guanyl-nucleotide exchange factor activity;	K05731	TIAM1; T-lymphoma invasion and metastasis-inducing protein 1
oar_circ_0000351	0	8	7	4.01551	6	3	3	-0.0983378	0.932143	0.999963	down	no	NC_019458.2:122482170..122484232:+	gene1701	gi|426217157|ref|XP_004002820.1|	7792	0	PREDICTED: LOW QUALITY PROTEIN: T-lymphoma invasion and metastasis-inducing protein 1 isoform X1 [Ovis aries]	gi|594058941|ref|XM_006053559.1|	6133	0	PREDICTED: Bubalus bubalis T-cell lymphoma invasion and metastasis 1 (TIAM1), transcript variant X2, mRNA	Q13009	2838	0	T-lymphoma invasion and metastasis-inducing protein 1	.	.	.	.	pfam00621	RhoGEF	RhoGEF domain. Guanine nucleotide exchange factor for Rho/Rac/Cdc42-like GTPases Also called Dbl-homologous (DH) domain. It appears that pfam00169 domains invariably occur C-terminal to RhoGEF/DH domains.	GO:0090630|activation of GTPase activity;GO:0006915|apoptotic process;GO:0003300|cardiac muscle hypertrophy;GO:0016477|cell migration;GO:0007160|cell-matrix adhesion;GO:0048013|ephrin receptor signaling pathway;GO:1990138|neuron projection extension;GO:0043065|positive regulation of apoptotic process;GO:0050772|positive regulation of axonogenesis;GO:0030335|positive regulation of cell migration;G…	GO:0044295|axonal growth cone;GO:0044291|cell-cell contact zone;GO:0005911|cell-cell junction;GO:0005829|cytosol;GO:0043197|dendritic spine;GO:0031234|extrinsic component of cytoplasmic side of plasma membrane;GO:0044304|main axon;GO:0005874|microtubule;GO:0043025|neuronal cell body;GO:0005634|nucleus;GO:0005886|plasma membrane;GO:0032587|ruffle membrane;	GO:0005085|guanyl-nucleotide exchange factor activity;GO:0019900|kinase binding;GO:0008289|lipid binding;GO:0030676|Rac guanyl-nucleotide exchange factor activity;GO:0005057|receptor signaling protein activity;GO:0005089|Rho guanyl-nucleotide exchange factor activity;	K05731	TIAM1; T-lymphoma invasion and metastasis-inducing protein 1
oar_circ_0000353	0	2	0	0.259949	0	0	0	1.18697	0.42538	NA	up	no	NC_019458.2:122489980..122500143:+	gene1701	gi|426217157|ref|XP_004002820.1|	7792	0	PREDICTED: LOW QUALITY PROTEIN: T-lymphoma invasion and metastasis-inducing protein 1 isoform X1 [Ovis aries]	gi|594058941|ref|XM_006053559.1|	6133	0	PREDICTED: Bubalus bubalis T-cell lymphoma invasion and metastasis 1 (TIAM1), transcript variant X2, mRNA	Q13009	2838	0	T-lymphoma invasion and metastasis-inducing protein 1	.	.	.	.	pfam00621	RhoGEF	RhoGEF domain. Guanine nucleotide exchange factor for Rho/Rac/Cdc42-like GTPases Also called Dbl-homologous (DH) domain. It appears that pfam00169 domains invariably occur C-terminal to RhoGEF/DH domains.	GO:0090630|activation of GTPase activity;GO:0006915|apoptotic process;GO:0003300|cardiac muscle hypertrophy;GO:0016477|cell migration;GO:0007160|cell-matrix adhesion;GO:0048013|ephrin receptor signaling pathway;GO:1990138|neuron projection extension;GO:0043065|positive regulation of apoptotic process;GO:0050772|positive regulation of axonogenesis;GO:0030335|positive regulation of cell migration;G…	GO:0044295|axonal growth cone;GO:0044291|cell-cell contact zone;GO:0005911|cell-cell junction;GO:0005829|cytosol;GO:0043197|dendritic spine;GO:0031234|extrinsic component of cytoplasmic side of plasma membrane;GO:0044304|main axon;GO:0005874|microtubule;GO:0043025|neuronal cell body;GO:0005634|nucleus;GO:0005886|plasma membrane;GO:0032587|ruffle membrane;	GO:0005085|guanyl-nucleotide exchange factor activity;GO:0019900|kinase binding;GO:0008289|lipid binding;GO:0030676|Rac guanyl-nucleotide exchange factor activity;GO:0005057|receptor signaling protein activity;GO:0005089|Rho guanyl-nucleotide exchange factor activity;	K05731	TIAM1; T-lymphoma invasion and metastasis-inducing protein 1
oar_circ_0000356	0	0	0	1.40712	3	0	5	-2.89291	0.0672703	NA	down	no	NC_019458.2:12410622..12428258:-	gene188	gi|803223158|ref|XP_011971865.1|	5182	0	PREDICTED: LOW QUALITY PROTEIN: type II inositol 1,4,5-trisphosphate 5-phosphatase isoform X7 [Ovis aries musimon]	gi|548461504|ref|XM_005678677.1|	2845	0	PREDICTED: Capra hircus inositol polyphosphate-5-phosphatase, 75kDa (INPP5B), mRNA	P32019	1735	0	Type II inositol 1,4,5-trisphosphate 5-phosphatase	YNL106c_2	227	5e-62	COG5411	pfam00620	RhoGAP	RhoGAP domain. GTPase activator proteins towards Rho/Rac/Cdc42-like small GTPases.	GO:0030317|sperm motility;GO:0001701|in utero embryonic development;GO:0043647|inositol phosphate metabolic process;GO:0046856|phosphatidylinositol dephosphorylation;GO:0070613|regulation of protein processing;GO:0051056|regulation of small GTPase mediated signal transduction;GO:0007165|signal transduction;GO:0007283|spermatogenesis;	GO:0005737|cytoplasm;GO:0005829|cytosol;GO:0031901|early endosome membrane;GO:0005793|endoplasmic reticulum-Golgi intermediate compartment;GO:0005794|Golgi apparatus;GO:0016021|integral component of membrane;GO:0016020|membrane;GO:0030670|phagocytic vesicle membrane;GO:0005886|plasma membrane;	GO:0005096|GTPase activator activity;GO:0052659|inositol-1,3,4,5-tetrakisphosphate 5-phosphatase activity;GO:0052658|inositol-1,4,5-trisphosphate 5-phosphatase activity;GO:0046872|metal ion binding;GO:0004439|phosphatidylinositol-4,5-bisphosphate 5-phosphatase activity;	K01099	E3.1.3.36; phosphatidylinositol-bisphosphatase [EC:3.1.3.36]
oar_circ_0000357	0	4	0	0.873472	0	0	2	0.285829	0.857554	NA	up	no	NC_019458.2:12413148..12419272:-	gene188	gi|803223158|ref|XP_011971865.1|	5182	0	PREDICTED: LOW QUALITY PROTEIN: type II inositol 1,4,5-trisphosphate 5-phosphatase isoform X7 [Ovis aries musimon]	gi|548461504|ref|XM_005678677.1|	2845	0	PREDICTED: Capra hircus inositol polyphosphate-5-phosphatase, 75kDa (INPP5B), mRNA	P32019	1735	0	Type II inositol 1,4,5-trisphosphate 5-phosphatase	YNL106c_2	227	5e-62	COG5411	pfam00620	RhoGAP	RhoGAP domain. GTPase activator proteins towards Rho/Rac/Cdc42-like small GTPases.	GO:0030317|sperm motility;GO:0001701|in utero embryonic development;GO:0043647|inositol phosphate metabolic process;GO:0046856|phosphatidylinositol dephosphorylation;GO:0070613|regulation of protein processing;GO:0051056|regulation of small GTPase mediated signal transduction;GO:0007165|signal transduction;GO:0007283|spermatogenesis;	GO:0005737|cytoplasm;GO:0005829|cytosol;GO:0031901|early endosome membrane;GO:0005793|endoplasmic reticulum-Golgi intermediate compartment;GO:0005794|Golgi apparatus;GO:0016021|integral component of membrane;GO:0016020|membrane;GO:0030670|phagocytic vesicle membrane;GO:0005886|plasma membrane;	GO:0005096|GTPase activator activity;GO:0052659|inositol-1,3,4,5-tetrakisphosphate 5-phosphatase activity;GO:0052658|inositol-1,4,5-trisphosphate 5-phosphatase activity;GO:0046872|metal ion binding;GO:0004439|phosphatidylinositol-4,5-bisphosphate 5-phosphatase activity;	K01099	E3.1.3.36; phosphatidylinositol-bisphosphatase [EC:3.1.3.36]
oar_circ_0000359	0	4	0	0.519898	0	0	0	1.4263	0.350041	NA	up	no	NC_019458.2:12421654..12424338:-	gene188	gi|803223158|ref|XP_011971865.1|	5182	0	PREDICTED: LOW QUALITY PROTEIN: type II inositol 1,4,5-trisphosphate 5-phosphatase isoform X7 [Ovis aries musimon]	gi|548461504|ref|XM_005678677.1|	2845	0	PREDICTED: Capra hircus inositol polyphosphate-5-phosphatase, 75kDa (INPP5B), mRNA	P32019	1735	0	Type II inositol 1,4,5-trisphosphate 5-phosphatase	YNL106c_2	227	5e-62	COG5411	pfam00620	RhoGAP	RhoGAP domain. GTPase activator proteins towards Rho/Rac/Cdc42-like small GTPases.	GO:0030317|sperm motility;GO:0001701|in utero embryonic development;GO:0043647|inositol phosphate metabolic process;GO:0046856|phosphatidylinositol dephosphorylation;GO:0070613|regulation of protein processing;GO:0051056|regulation of small GTPase mediated signal transduction;GO:0007165|signal transduction;GO:0007283|spermatogenesis;	GO:0005737|cytoplasm;GO:0005829|cytosol;GO:0031901|early endosome membrane;GO:0005793|endoplasmic reticulum-Golgi intermediate compartment;GO:0005794|Golgi apparatus;GO:0016021|integral component of membrane;GO:0016020|membrane;GO:0030670|phagocytic vesicle membrane;GO:0005886|plasma membrane;	GO:0005096|GTPase activator activity;GO:0052659|inositol-1,3,4,5-tetrakisphosphate 5-phosphatase activity;GO:0052658|inositol-1,4,5-trisphosphate 5-phosphatase activity;GO:0046872|metal ion binding;GO:0004439|phosphatidylinositol-4,5-bisphosphate 5-phosphatase activity;	K01099	E3.1.3.36; phosphatidylinositol-bisphosphatase [EC:3.1.3.36]
oar_circ_0000360	0	2	0	0.259949	0	0	0	1.18697	0.42538	NA	up	no	NC_019458.2:12421654..12428258:-	gene188	gi|803223158|ref|XP_011971865.1|	5182	0	PREDICTED: LOW QUALITY PROTEIN: type II inositol 1,4,5-trisphosphate 5-phosphatase isoform X7 [Ovis aries musimon]	gi|548461504|ref|XM_005678677.1|	2845	0	PREDICTED: Capra hircus inositol polyphosphate-5-phosphatase, 75kDa (INPP5B), mRNA	P32019	1735	0	Type II inositol 1,4,5-trisphosphate 5-phosphatase	YNL106c_2	227	5e-62	COG5411	pfam00620	RhoGAP	RhoGAP domain. GTPase activator proteins towards Rho/Rac/Cdc42-like small GTPases.	GO:0030317|sperm motility;GO:0001701|in utero embryonic development;GO:0043647|inositol phosphate metabolic process;GO:0046856|phosphatidylinositol dephosphorylation;GO:0070613|regulation of protein processing;GO:0051056|regulation of small GTPase mediated signal transduction;GO:0007165|signal transduction;GO:0007283|spermatogenesis;	GO:0005737|cytoplasm;GO:0005829|cytosol;GO:0031901|early endosome membrane;GO:0005793|endoplasmic reticulum-Golgi intermediate compartment;GO:0005794|Golgi apparatus;GO:0016021|integral component of membrane;GO:0016020|membrane;GO:0030670|phagocytic vesicle membrane;GO:0005886|plasma membrane;	GO:0005096|GTPase activator activity;GO:0052659|inositol-1,3,4,5-tetrakisphosphate 5-phosphatase activity;GO:0052658|inositol-1,4,5-trisphosphate 5-phosphatase activity;GO:0046872|metal ion binding;GO:0004439|phosphatidylinositol-4,5-bisphosphate 5-phosphatase activity;	K01099	E3.1.3.36; phosphatidylinositol-bisphosphatase [EC:3.1.3.36]
oar_circ_0000361	0	3	3	2.34337	2	0	7	-0.754141	0.587911	0.999963	down	no	NC_019458.2:12424972..12428258:-	gene188	gi|803223158|ref|XP_011971865.1|	5182	0	PREDICTED: LOW QUALITY PROTEIN: type II inositol 1,4,5-trisphosphate 5-phosphatase isoform X7 [Ovis aries musimon]	gi|548461504|ref|XM_005678677.1|	2845	0	PREDICTED: Capra hircus inositol polyphosphate-5-phosphatase, 75kDa (INPP5B), mRNA	P32019	1735	0	Type II inositol 1,4,5-trisphosphate 5-phosphatase	YNL106c_2	227	5e-62	COG5411	pfam00620	RhoGAP	RhoGAP domain. GTPase activator proteins towards Rho/Rac/Cdc42-like small GTPases.	GO:0030317|sperm motility;GO:0001701|in utero embryonic development;GO:0043647|inositol phosphate metabolic process;GO:0046856|phosphatidylinositol dephosphorylation;GO:0070613|regulation of protein processing;GO:0051056|regulation of small GTPase mediated signal transduction;GO:0007165|signal transduction;GO:0007283|spermatogenesis;	GO:0005737|cytoplasm;GO:0005829|cytosol;GO:0031901|early endosome membrane;GO:0005793|endoplasmic reticulum-Golgi intermediate compartment;GO:0005794|Golgi apparatus;GO:0016021|integral component of membrane;GO:0016020|membrane;GO:0030670|phagocytic vesicle membrane;GO:0005886|plasma membrane;	GO:0005096|GTPase activator activity;GO:0052659|inositol-1,3,4,5-tetrakisphosphate 5-phosphatase activity;GO:0052658|inositol-1,4,5-trisphosphate 5-phosphatase activity;GO:0046872|metal ion binding;GO:0004439|phosphatidylinositol-4,5-bisphosphate 5-phosphatase activity;	K01099	E3.1.3.36; phosphatidylinositol-bisphosphatase [EC:3.1.3.36]
oar_circ_0000364	0	4	2	0.764661	0	0	0	1.98891	0.209692	NA	up	no	NC_019458.2:124383226..124421928:+	gene1717	gi|426217181|ref|XP_004002832.1|	4730	0	PREDICTED: glutamate receptor ionotropic, kainate 1 isoform X5 [Ovis aries]	gi|556754665|ref|XM_005972634.1|	3005	0	PREDICTED: Pantholops hodgsonii glutamate receptor, ionotropic, kainate 1 (GRIK1), transcript variant X4, mRNA	P22756	1660	0	Glutamate receptor ionotropic, kainate 1	.	.	.	.	pfam00060	Lig_chan	Ligand-gated ion channel. This family includes the four transmembrane regions of the ionotropic glutamate receptors and NMDA receptors.	GO:0007417|central nervous system development;GO:0007268|synaptic transmission;GO:0007215|glutamate receptor signaling pathway;GO:0007399|nervous system development;GO:0051966|regulation of synaptic transmission, glutamatergic;GO:0006810|transport;	GO:0030054|cell junction;GO:0005887|integral component of plasma membrane;GO:0005886|plasma membrane;GO:0045211|postsynaptic membrane;	GO:0005234|extracellular-glutamate-gated ion channel activity;GO:0015277|kainate selective glutamate receptor activity;GO:0015276|ligand-gated ion channel activity;	K05201	GRIK1; glutamate receptor, ionotropic kainate 1
oar_circ_0000365	33	60	49	32.7108	15	18	34	0.78788	0.123632	0.999963	up	no	NC_019458.2:124403927..124408592:+	gene1717	gi|426217181|ref|XP_004002832.1|	4730	0	PREDICTED: glutamate receptor ionotropic, kainate 1 isoform X5 [Ovis aries]	gi|556754665|ref|XM_005972634.1|	3005	0	PREDICTED: Pantholops hodgsonii glutamate receptor, ionotropic, kainate 1 (GRIK1), transcript variant X4, mRNA	P22756	1660	0	Glutamate receptor ionotropic, kainate 1	.	.	.	.	pfam00060	Lig_chan	Ligand-gated ion channel. This family includes the four transmembrane regions of the ionotropic glutamate receptors and NMDA receptors.	GO:0007417|central nervous system development;GO:0007268|synaptic transmission;GO:0007215|glutamate receptor signaling pathway;GO:0007399|nervous system development;GO:0051966|regulation of synaptic transmission, glutamatergic;GO:0006810|transport;	GO:0030054|cell junction;GO:0005887|integral component of plasma membrane;GO:0005886|plasma membrane;GO:0045211|postsynaptic membrane;	GO:0005234|extracellular-glutamate-gated ion channel activity;GO:0015277|kainate selective glutamate receptor activity;GO:0015276|ligand-gated ion channel activity;	K05201	GRIK1; glutamate receptor, ionotropic kainate 1
oar_circ_0000366	73	61	59	57.5329	37	54	60	0.17742	0.68802	0.999963	up	no	NC_019458.2:124403927..124421928:+	gene1717	gi|426217181|ref|XP_004002832.1|	4730	0	PREDICTED: glutamate receptor ionotropic, kainate 1 isoform X5 [Ovis aries]	gi|556754665|ref|XM_005972634.1|	3005	0	PREDICTED: Pantholops hodgsonii glutamate receptor, ionotropic, kainate 1 (GRIK1), transcript variant X4, mRNA	P22756	1660	0	Glutamate receptor ionotropic, kainate 1	.	.	.	.	pfam00060	Lig_chan	Ligand-gated ion channel. This family includes the four transmembrane regions of the ionotropic glutamate receptors and NMDA receptors.	GO:0007417|central nervous system development;GO:0007268|synaptic transmission;GO:0007215|glutamate receptor signaling pathway;GO:0007399|nervous system development;GO:0051966|regulation of synaptic transmission, glutamatergic;GO:0006810|transport;	GO:0030054|cell junction;GO:0005887|integral component of plasma membrane;GO:0005886|plasma membrane;GO:0045211|postsynaptic membrane;	GO:0005234|extracellular-glutamate-gated ion channel activity;GO:0015277|kainate selective glutamate receptor activity;GO:0015276|ligand-gated ion channel activity;	K05201	GRIK1; glutamate receptor, ionotropic kainate 1
oar_circ_0000367	8	5	2	4.37994	0	3	7	0.42847	0.715234	0.999963	up	no	NC_019458.2:124403927..124447192:+	gene1717	gi|426217181|ref|XP_004002832.1|	4730	0	PREDICTED: glutamate receptor ionotropic, kainate 1 isoform X5 [Ovis aries]	gi|556754665|ref|XM_005972634.1|	3005	0	PREDICTED: Pantholops hodgsonii glutamate receptor, ionotropic, kainate 1 (GRIK1), transcript variant X4, mRNA	P22756	1660	0	Glutamate receptor ionotropic, kainate 1	.	.	.	.	pfam00060	Lig_chan	Ligand-gated ion channel. This family includes the four transmembrane regions of the ionotropic glutamate receptors and NMDA receptors.	GO:0007417|central nervous system development;GO:0007268|synaptic transmission;GO:0007215|glutamate receptor signaling pathway;GO:0007399|nervous system development;GO:0051966|regulation of synaptic transmission, glutamatergic;GO:0006810|transport;	GO:0030054|cell junction;GO:0005887|integral component of plasma membrane;GO:0005886|plasma membrane;GO:0045211|postsynaptic membrane;	GO:0005234|extracellular-glutamate-gated ion channel activity;GO:0015277|kainate selective glutamate receptor activity;GO:0015276|ligand-gated ion channel activity;	K05201	GRIK1; glutamate receptor, ionotropic kainate 1
oar_circ_0000368	4	8	9	4.59302	0	2	7	0.77708	0.490243	0.999963	up	no	NC_019458.2:124403927..124461792:+	gene1717	gi|426217181|ref|XP_004002832.1|	4730	0	PREDICTED: glutamate receptor ionotropic, kainate 1 isoform X5 [Ovis aries]	gi|556754665|ref|XM_005972634.1|	3005	0	PREDICTED: Pantholops hodgsonii glutamate receptor, ionotropic, kainate 1 (GRIK1), transcript variant X4, mRNA	P22756	1660	0	Glutamate receptor ionotropic, kainate 1	.	.	.	.	pfam00060	Lig_chan	Ligand-gated ion channel. This family includes the four transmembrane regions of the ionotropic glutamate receptors and NMDA receptors.	GO:0007417|central nervous system development;GO:0007268|synaptic transmission;GO:0007215|glutamate receptor signaling pathway;GO:0007399|nervous system development;GO:0051966|regulation of synaptic transmission, glutamatergic;GO:0006810|transport;	GO:0030054|cell junction;GO:0005887|integral component of plasma membrane;GO:0005886|plasma membrane;GO:0045211|postsynaptic membrane;	GO:0005234|extracellular-glutamate-gated ion channel activity;GO:0015277|kainate selective glutamate receptor activity;GO:0015276|ligand-gated ion channel activity;	K05201	GRIK1; glutamate receptor, ionotropic kainate 1
oar_circ_0000369	2	6	0	1.55501	2	0	0	1.12211	0.463297	NA	up	no	NC_019458.2:124408335..124421928:+	gene1717	gi|426217181|ref|XP_004002832.1|	4730	0	PREDICTED: glutamate receptor ionotropic, kainate 1 isoform X5 [Ovis aries]	gi|556754665|ref|XM_005972634.1|	3005	0	PREDICTED: Pantholops hodgsonii glutamate receptor, ionotropic, kainate 1 (GRIK1), transcript variant X4, mRNA	P22756	1660	0	Glutamate receptor ionotropic, kainate 1	.	.	.	.	pfam00060	Lig_chan	Ligand-gated ion channel. This family includes the four transmembrane regions of the ionotropic glutamate receptors and NMDA receptors.	GO:0007417|central nervous system development;GO:0007268|synaptic transmission;GO:0007215|glutamate receptor signaling pathway;GO:0007399|nervous system development;GO:0051966|regulation of synaptic transmission, glutamatergic;GO:0006810|transport;	GO:0030054|cell junction;GO:0005887|integral component of plasma membrane;GO:0005886|plasma membrane;GO:0045211|postsynaptic membrane;	GO:0005234|extracellular-glutamate-gated ion channel activity;GO:0015277|kainate selective glutamate receptor activity;GO:0015276|ligand-gated ion channel activity;	K05201	GRIK1; glutamate receptor, ionotropic kainate 1
oar_circ_0000371	0	0	0	0.353574	0	0	2	-1.33301	0.37664	NA	down	no	NC_019458.2:124408335..124447192:+	gene1717	gi|426217181|ref|XP_004002832.1|	4730	0	PREDICTED: glutamate receptor ionotropic, kainate 1 isoform X5 [Ovis aries]	gi|556754665|ref|XM_005972634.1|	3005	0	PREDICTED: Pantholops hodgsonii glutamate receptor, ionotropic, kainate 1 (GRIK1), transcript variant X4, mRNA	P22756	1660	0	Glutamate receptor ionotropic, kainate 1	.	.	.	.	pfam00060	Lig_chan	Ligand-gated ion channel. This family includes the four transmembrane regions of the ionotropic glutamate receptors and NMDA receptors.	GO:0007417|central nervous system development;GO:0007268|synaptic transmission;GO:0007215|glutamate receptor signaling pathway;GO:0007399|nervous system development;GO:0051966|regulation of synaptic transmission, glutamatergic;GO:0006810|transport;	GO:0030054|cell junction;GO:0005887|integral component of plasma membrane;GO:0005886|plasma membrane;GO:0045211|postsynaptic membrane;	GO:0005234|extracellular-glutamate-gated ion channel activity;GO:0015277|kainate selective glutamate receptor activity;GO:0015276|ligand-gated ion channel activity;	K05201	GRIK1; glutamate receptor, ionotropic kainate 1
oar_circ_0000375	0	5	3	1.5402	3	0	0	0.633989	0.677446	NA	up	no	NC_019458.2:124447019..124554863:+	gene1717	gi|426217181|ref|XP_004002832.1|	4730	0	PREDICTED: glutamate receptor ionotropic, kainate 1 isoform X5 [Ovis aries]	gi|556754665|ref|XM_005972634.1|	3005	0	PREDICTED: Pantholops hodgsonii glutamate receptor, ionotropic, kainate 1 (GRIK1), transcript variant X4, mRNA	P22756	1660	0	Glutamate receptor ionotropic, kainate 1	.	.	.	.	pfam00060	Lig_chan	Ligand-gated ion channel. This family includes the four transmembrane regions of the ionotropic glutamate receptors and NMDA receptors.	GO:0007417|central nervous system development;GO:0007268|synaptic transmission;GO:0007215|glutamate receptor signaling pathway;GO:0007399|nervous system development;GO:0051966|regulation of synaptic transmission, glutamatergic;GO:0006810|transport;	GO:0030054|cell junction;GO:0005887|integral component of plasma membrane;GO:0005886|plasma membrane;GO:0045211|postsynaptic membrane;	GO:0005234|extracellular-glutamate-gated ion channel activity;GO:0015277|kainate selective glutamate receptor activity;GO:0015276|ligand-gated ion channel activity;	K05201	GRIK1; glutamate receptor, ionotropic kainate 1
oar_circ_0000376	0	2	3	1.68064	3	0	3	-0.486284	0.739523	NA	down	no	NC_019458.2:124507430..124520498:+	gene1717	gi|426217181|ref|XP_004002832.1|	4730	0	PREDICTED: glutamate receptor ionotropic, kainate 1 isoform X5 [Ovis aries]	gi|556754665|ref|XM_005972634.1|	3005	0	PREDICTED: Pantholops hodgsonii glutamate receptor, ionotropic, kainate 1 (GRIK1), transcript variant X4, mRNA	P22756	1660	0	Glutamate receptor ionotropic, kainate 1	.	.	.	.	pfam00060	Lig_chan	Ligand-gated ion channel. This family includes the four transmembrane regions of the ionotropic glutamate receptors and NMDA receptors.	GO:0007417|central nervous system development;GO:0007268|synaptic transmission;GO:0007215|glutamate receptor signaling pathway;GO:0007399|nervous system development;GO:0051966|regulation of synaptic transmission, glutamatergic;GO:0006810|transport;	GO:0030054|cell junction;GO:0005887|integral component of plasma membrane;GO:0005886|plasma membrane;GO:0045211|postsynaptic membrane;	GO:0005234|extracellular-glutamate-gated ion channel activity;GO:0015277|kainate selective glutamate receptor activity;GO:0015276|ligand-gated ion channel activity;	K05201	GRIK1; glutamate receptor, ionotropic kainate 1
oar_circ_0000377	7	7	3	3.29245	3	0	0	1.85691	0.153729	0.999963	up	no	NC_019458.2:124507430..124531163:+	gene1717	gi|426217181|ref|XP_004002832.1|	4730	0	PREDICTED: glutamate receptor ionotropic, kainate 1 isoform X5 [Ovis aries]	gi|556754665|ref|XM_005972634.1|	3005	0	PREDICTED: Pantholops hodgsonii glutamate receptor, ionotropic, kainate 1 (GRIK1), transcript variant X4, mRNA	P22756	1660	0	Glutamate receptor ionotropic, kainate 1	.	.	.	.	pfam00060	Lig_chan	Ligand-gated ion channel. This family includes the four transmembrane regions of the ionotropic glutamate receptors and NMDA receptors.	GO:0007417|central nervous system development;GO:0007268|synaptic transmission;GO:0007215|glutamate receptor signaling pathway;GO:0007399|nervous system development;GO:0051966|regulation of synaptic transmission, glutamatergic;GO:0006810|transport;	GO:0030054|cell junction;GO:0005887|integral component of plasma membrane;GO:0005886|plasma membrane;GO:0045211|postsynaptic membrane;	GO:0005234|extracellular-glutamate-gated ion channel activity;GO:0015277|kainate selective glutamate receptor activity;GO:0015276|ligand-gated ion channel activity;	K05201	GRIK1; glutamate receptor, ionotropic kainate 1
oar_circ_0000378	0	5	0	0.649873	0	0	0	1.58262	0.306597	NA	up	no	NC_019458.2:124507430..124547318:+	gene1717	gi|426217181|ref|XP_004002832.1|	4730	0	PREDICTED: glutamate receptor ionotropic, kainate 1 isoform X5 [Ovis aries]	gi|556754665|ref|XM_005972634.1|	3005	0	PREDICTED: Pantholops hodgsonii glutamate receptor, ionotropic, kainate 1 (GRIK1), transcript variant X4, mRNA	P22756	1660	0	Glutamate receptor ionotropic, kainate 1	.	.	.	.	pfam00060	Lig_chan	Ligand-gated ion channel. This family includes the four transmembrane regions of the ionotropic glutamate receptors and NMDA receptors.	GO:0007417|central nervous system development;GO:0007268|synaptic transmission;GO:0007215|glutamate receptor signaling pathway;GO:0007399|nervous system development;GO:0051966|regulation of synaptic transmission, glutamatergic;GO:0006810|transport;	GO:0030054|cell junction;GO:0005887|integral component of plasma membrane;GO:0005886|plasma membrane;GO:0045211|postsynaptic membrane;	GO:0005234|extracellular-glutamate-gated ion channel activity;GO:0015277|kainate selective glutamate receptor activity;GO:0015276|ligand-gated ion channel activity;	K05201	GRIK1; glutamate receptor, ionotropic kainate 1
oar_circ_0000379	0	0	0	0.353574	0	0	2	-1.33301	0.37664	NA	down	no	NC_019458.2:124507430..124554863:+	gene1717	gi|426217181|ref|XP_004002832.1|	4730	0	PREDICTED: glutamate receptor ionotropic, kainate 1 isoform X5 [Ovis aries]	gi|556754665|ref|XM_005972634.1|	3005	0	PREDICTED: Pantholops hodgsonii glutamate receptor, ionotropic, kainate 1 (GRIK1), transcript variant X4, mRNA	P22756	1660	0	Glutamate receptor ionotropic, kainate 1	.	.	.	.	pfam00060	Lig_chan	Ligand-gated ion channel. This family includes the four transmembrane regions of the ionotropic glutamate receptors and NMDA receptors.	GO:0007417|central nervous system development;GO:0007268|synaptic transmission;GO:0007215|glutamate receptor signaling pathway;GO:0007399|nervous system development;GO:0051966|regulation of synaptic transmission, glutamatergic;GO:0006810|transport;	GO:0030054|cell junction;GO:0005887|integral component of plasma membrane;GO:0005886|plasma membrane;GO:0045211|postsynaptic membrane;	GO:0005234|extracellular-glutamate-gated ion channel activity;GO:0015277|kainate selective glutamate receptor activity;GO:0015276|ligand-gated ion channel activity;	K05201	GRIK1; glutamate receptor, ionotropic kainate 1
oar_circ_0000380	3	5	0	2.17336	0	0	5	0.364151	0.804252	0.999963	up	no	NC_019458.2:124515463..124547318:+	gene1717	gi|426217181|ref|XP_004002832.1|	4730	0	PREDICTED: glutamate receptor ionotropic, kainate 1 isoform X5 [Ovis aries]	gi|556754665|ref|XM_005972634.1|	3005	0	PREDICTED: Pantholops hodgsonii glutamate receptor, ionotropic, kainate 1 (GRIK1), transcript variant X4, mRNA	P22756	1660	0	Glutamate receptor ionotropic, kainate 1	.	.	.	.	pfam00060	Lig_chan	Ligand-gated ion channel. This family includes the four transmembrane regions of the ionotropic glutamate receptors and NMDA receptors.	GO:0007417|central nervous system development;GO:0007268|synaptic transmission;GO:0007215|glutamate receptor signaling pathway;GO:0007399|nervous system development;GO:0051966|regulation of synaptic transmission, glutamatergic;GO:0006810|transport;	GO:0030054|cell junction;GO:0005887|integral component of plasma membrane;GO:0005886|plasma membrane;GO:0045211|postsynaptic membrane;	GO:0005234|extracellular-glutamate-gated ion channel activity;GO:0015277|kainate selective glutamate receptor activity;GO:0015276|ligand-gated ion channel activity;	K05201	GRIK1; glutamate receptor, ionotropic kainate 1
oar_circ_0000381	0	0	5	1.8518	4	3	0	-0.649346	0.66383	NA	down	no	NC_019458.2:124515463..124554863:+	gene1717	gi|426217181|ref|XP_004002832.1|	4730	0	PREDICTED: glutamate receptor ionotropic, kainate 1 isoform X5 [Ovis aries]	gi|556754665|ref|XM_005972634.1|	3005	0	PREDICTED: Pantholops hodgsonii glutamate receptor, ionotropic, kainate 1 (GRIK1), transcript variant X4, mRNA	P22756	1660	0	Glutamate receptor ionotropic, kainate 1	.	.	.	.	pfam00060	Lig_chan	Ligand-gated ion channel. This family includes the four transmembrane regions of the ionotropic glutamate receptors and NMDA receptors.	GO:0007417|central nervous system development;GO:0007268|synaptic transmission;GO:0007215|glutamate receptor signaling pathway;GO:0007399|nervous system development;GO:0051966|regulation of synaptic transmission, glutamatergic;GO:0006810|transport;	GO:0030054|cell junction;GO:0005887|integral component of plasma membrane;GO:0005886|plasma membrane;GO:0045211|postsynaptic membrane;	GO:0005234|extracellular-glutamate-gated ion channel activity;GO:0015277|kainate selective glutamate receptor activity;GO:0015276|ligand-gated ion channel activity;	K05201	GRIK1; glutamate receptor, ionotropic kainate 1
oar_circ_0000382	0	3	0	0.389924	0	0	0	1.32957	0.379611	NA	up	no	NC_019458.2:124519119..124520498:+	gene1717	gi|426217181|ref|XP_004002832.1|	4730	0	PREDICTED: glutamate receptor ionotropic, kainate 1 isoform X5 [Ovis aries]	gi|556754665|ref|XM_005972634.1|	3005	0	PREDICTED: Pantholops hodgsonii glutamate receptor, ionotropic, kainate 1 (GRIK1), transcript variant X4, mRNA	P22756	1660	0	Glutamate receptor ionotropic, kainate 1	.	.	.	.	pfam00060	Lig_chan	Ligand-gated ion channel. This family includes the four transmembrane regions of the ionotropic glutamate receptors and NMDA receptors.	GO:0007417|central nervous system development;GO:0007268|synaptic transmission;GO:0007215|glutamate receptor signaling pathway;GO:0007399|nervous system development;GO:0051966|regulation of synaptic transmission, glutamatergic;GO:0006810|transport;	GO:0030054|cell junction;GO:0005887|integral component of plasma membrane;GO:0005886|plasma membrane;GO:0045211|postsynaptic membrane;	GO:0005234|extracellular-glutamate-gated ion channel activity;GO:0015277|kainate selective glutamate receptor activity;GO:0015276|ligand-gated ion channel activity;	K05201	GRIK1; glutamate receptor, ionotropic kainate 1
oar_circ_0000383	12	6	10	10.0534	7	7	17	-0.278931	0.733104	0.999963	down	no	NC_019458.2:124519119..124531163:+	gene1717	gi|426217181|ref|XP_004002832.1|	4730	0	PREDICTED: glutamate receptor ionotropic, kainate 1 isoform X5 [Ovis aries]	gi|556754665|ref|XM_005972634.1|	3005	0	PREDICTED: Pantholops hodgsonii glutamate receptor, ionotropic, kainate 1 (GRIK1), transcript variant X4, mRNA	P22756	1660	0	Glutamate receptor ionotropic, kainate 1	.	.	.	.	pfam00060	Lig_chan	Ligand-gated ion channel. This family includes the four transmembrane regions of the ionotropic glutamate receptors and NMDA receptors.	GO:0007417|central nervous system development;GO:0007268|synaptic transmission;GO:0007215|glutamate receptor signaling pathway;GO:0007399|nervous system development;GO:0051966|regulation of synaptic transmission, glutamatergic;GO:0006810|transport;	GO:0030054|cell junction;GO:0005887|integral component of plasma membrane;GO:0005886|plasma membrane;GO:0045211|postsynaptic membrane;	GO:0005234|extracellular-glutamate-gated ion channel activity;GO:0015277|kainate selective glutamate receptor activity;GO:0015276|ligand-gated ion channel activity;	K05201	GRIK1; glutamate receptor, ionotropic kainate 1
oar_circ_0000384	0	0	0	0.353574	0	0	2	-1.33301	0.37664	NA	down	no	NC_019458.2:124519119..124547318:+	gene1717	gi|426217181|ref|XP_004002832.1|	4730	0	PREDICTED: glutamate receptor ionotropic, kainate 1 isoform X5 [Ovis aries]	gi|556754665|ref|XM_005972634.1|	3005	0	PREDICTED: Pantholops hodgsonii glutamate receptor, ionotropic, kainate 1 (GRIK1), transcript variant X4, mRNA	P22756	1660	0	Glutamate receptor ionotropic, kainate 1	.	.	.	.	pfam00060	Lig_chan	Ligand-gated ion channel. This family includes the four transmembrane regions of the ionotropic glutamate receptors and NMDA receptors.	GO:0007417|central nervous system development;GO:0007268|synaptic transmission;GO:0007215|glutamate receptor signaling pathway;GO:0007399|nervous system development;GO:0051966|regulation of synaptic transmission, glutamatergic;GO:0006810|transport;	GO:0030054|cell junction;GO:0005887|integral component of plasma membrane;GO:0005886|plasma membrane;GO:0045211|postsynaptic membrane;	GO:0005234|extracellular-glutamate-gated ion channel activity;GO:0015277|kainate selective glutamate receptor activity;GO:0015276|ligand-gated ion channel activity;	K05201	GRIK1; glutamate receptor, ionotropic kainate 1
oar_circ_0000385	3	0	0	1.53066	2	3	0	-0.361065	0.813839	NA	down	no	NC_019458.2:124519119..124554863:+	gene1717	gi|426217181|ref|XP_004002832.1|	4730	0	PREDICTED: glutamate receptor ionotropic, kainate 1 isoform X5 [Ovis aries]	gi|556754665|ref|XM_005972634.1|	3005	0	PREDICTED: Pantholops hodgsonii glutamate receptor, ionotropic, kainate 1 (GRIK1), transcript variant X4, mRNA	P22756	1660	0	Glutamate receptor ionotropic, kainate 1	.	.	.	.	pfam00060	Lig_chan	Ligand-gated ion channel. This family includes the four transmembrane regions of the ionotropic glutamate receptors and NMDA receptors.	GO:0007417|central nervous system development;GO:0007268|synaptic transmission;GO:0007215|glutamate receptor signaling pathway;GO:0007399|nervous system development;GO:0051966|regulation of synaptic transmission, glutamatergic;GO:0006810|transport;	GO:0030054|cell junction;GO:0005887|integral component of plasma membrane;GO:0005886|plasma membrane;GO:0045211|postsynaptic membrane;	GO:0005234|extracellular-glutamate-gated ion channel activity;GO:0015277|kainate selective glutamate receptor activity;GO:0015276|ligand-gated ion channel activity;	K05201	GRIK1; glutamate receptor, ionotropic kainate 1
oar_circ_0000386	0	0	0	0.523184	3	0	0	-1.46707	0.336722	NA	down	no	NC_019458.2:124520275..124531163:+	gene1717	gi|426217181|ref|XP_004002832.1|	4730	0	PREDICTED: glutamate receptor ionotropic, kainate 1 isoform X5 [Ovis aries]	gi|556754665|ref|XM_005972634.1|	3005	0	PREDICTED: Pantholops hodgsonii glutamate receptor, ionotropic, kainate 1 (GRIK1), transcript variant X4, mRNA	P22756	1660	0	Glutamate receptor ionotropic, kainate 1	.	.	.	.	pfam00060	Lig_chan	Ligand-gated ion channel. This family includes the four transmembrane regions of the ionotropic glutamate receptors and NMDA receptors.	GO:0007417|central nervous system development;GO:0007268|synaptic transmission;GO:0007215|glutamate receptor signaling pathway;GO:0007399|nervous system development;GO:0051966|regulation of synaptic transmission, glutamatergic;GO:0006810|transport;	GO:0030054|cell junction;GO:0005887|integral component of plasma membrane;GO:0005886|plasma membrane;GO:0045211|postsynaptic membrane;	GO:0005234|extracellular-glutamate-gated ion channel activity;GO:0015277|kainate selective glutamate receptor activity;GO:0015276|ligand-gated ion channel activity;	K05201	GRIK1; glutamate receptor, ionotropic kainate 1
oar_circ_0000388	0	0	5	0.96548	0	0	2	0.419759	0.792091	NA	up	no	NC_019458.2:124526558..124554863:+	gene1717	gi|426217181|ref|XP_004002832.1|	4730	0	PREDICTED: glutamate receptor ionotropic, kainate 1 isoform X5 [Ovis aries]	gi|556754665|ref|XM_005972634.1|	3005	0	PREDICTED: Pantholops hodgsonii glutamate receptor, ionotropic, kainate 1 (GRIK1), transcript variant X4, mRNA	P22756	1660	0	Glutamate receptor ionotropic, kainate 1	.	.	.	.	pfam00060	Lig_chan	Ligand-gated ion channel. This family includes the four transmembrane regions of the ionotropic glutamate receptors and NMDA receptors.	GO:0007417|central nervous system development;GO:0007268|synaptic transmission;GO:0007215|glutamate receptor signaling pathway;GO:0007399|nervous system development;GO:0051966|regulation of synaptic transmission, glutamatergic;GO:0006810|transport;	GO:0030054|cell junction;GO:0005887|integral component of plasma membrane;GO:0005886|plasma membrane;GO:0045211|postsynaptic membrane;	GO:0005234|extracellular-glutamate-gated ion channel activity;GO:0015277|kainate selective glutamate receptor activity;GO:0015276|ligand-gated ion channel activity;	K05201	GRIK1; glutamate receptor, ionotropic kainate 1
oar_circ_0000389	0	3	0	3.24082	4	8	4	-2.18207	0.0927074	0.999963	down	no	NC_019458.2:12469452..12479222:-	gene189	gi|823411217|ref|XP_012418649.1|	2578	0	PREDICTED: splicing factor 3A subunit 3 isoform X1 [Odobenus rosmarus divergens]	gi|548461502|ref|XM_005678676.1|	1781	0	PREDICTED: Capra hircus splicing factor 3a, subunit 3, 60kDa (SF3A3), mRNA	Q12874	978	0	Splicing factor 3A subunit 3	SPBC36.09	253	4e-74	COG5188	pfam11931	DUF3449	Domain of unknown function (DUF3449). This presumed domain is functionally uncharacterized. This domain is found in eukaryotes. This domain is typically between 181 to 207 amino acids in length. This domain has two conserved sequence motifs: PIP and CEICG. The domain carries a zinc-finger domain of the C2H2-type.	GO:0000389|mRNA 3'-splice site recognition;GO:0006397|mRNA processing;GO:0000398|mRNA splicing, via spliceosome;GO:0008380|RNA splicing;GO:0000375|RNA splicing, via transesterification reactions;	GO:0071013|catalytic step 2 spliceosome;GO:0016607|nuclear speck;GO:0005654|nucleoplasm;GO:0005681|spliceosomal complex;	GO:0044822|poly(A) RNA binding;GO:0003723|RNA binding;GO:0008270|zinc ion binding;	K12827	SF3A3, SAP61, PRP9; splicing factor 3A subunit 3
oar_circ_0000391	0	0	2	1.49821	0	4	3	-1.42061	0.353839	NA	down	no	NC_019458.2:12485706..12490658:-	gene189	gi|823411217|ref|XP_012418649.1|	2578	0	PREDICTED: splicing factor 3A subunit 3 isoform X1 [Odobenus rosmarus divergens]	gi|548461502|ref|XM_005678676.1|	1781	0	PREDICTED: Capra hircus splicing factor 3a, subunit 3, 60kDa (SF3A3), mRNA	Q12874	978	0	Splicing factor 3A subunit 3	SPBC36.09	253	4e-74	COG5188	pfam11931	DUF3449	Domain of unknown function (DUF3449). This presumed domain is functionally uncharacterized. This domain is found in eukaryotes. This domain is typically between 181 to 207 amino acids in length. This domain has two conserved sequence motifs: PIP and CEICG. The domain carries a zinc-finger domain of the C2H2-type.	GO:0000389|mRNA 3'-splice site recognition;GO:0006397|mRNA processing;GO:0000398|mRNA splicing, via spliceosome;GO:0008380|RNA splicing;GO:0000375|RNA splicing, via transesterification reactions;	GO:0071013|catalytic step 2 spliceosome;GO:0016607|nuclear speck;GO:0005654|nucleoplasm;GO:0005681|spliceosomal complex;	GO:0044822|poly(A) RNA binding;GO:0003723|RNA binding;GO:0008270|zinc ion binding;	K12827	SF3A3, SAP61, PRP9; splicing factor 3A subunit 3
oar_circ_0000392	3	5	0	1.28943	0	0	0	2.64349	0.0959034	NA	up	no	NC_019458.2:125133661..125136594:+	gene1722	gi|528935832|ref|XP_005201176.1|	2747	0	PREDICTED: T-complex protein 1 subunit theta isoform X1 [Bos taurus]	gi|548449178|ref|XM_005674713.1|	1857	0	PREDICTED: Capra hircus chaperonin containing TCP1, subunit 8 (theta) (CCT8), mRNA	Q3ZCI9	1014	0	T-complex protein 1 subunit theta	.	.	.	.	pfam00118	Cpn60_TCP1	TCP-1/cpn60 chaperonin family. This family includes members from the HSP60 chaperone family and the TCP-1 (T-complex protein) family.	GO:0006457|protein folding;	GO:0005832|chaperonin-containing T-complex;GO:0005929|cilium;GO:0005815|microtubule organizing center;	GO:0005524|ATP binding;	K09500	CCT8; T-complex protein 1 subunit theta
oar_circ_0000395	7	2	8	4.31042	5	0	4	0.644269	0.578679	0.999963	up	no	NC_019458.2:125204544..125229117:+	gene1725	gi|802996433|ref|XP_004002841.2|	8794	0	PREDICTED: E3 ubiquitin-protein ligase listerin [Ovis aries]	gi|548449215|ref|XM_005674720.1|	7435	0	PREDICTED: Capra hircus listerin E3 ubiquitin protein ligase 1 (LTN1), mRNA	O94822	3057	0	E3 ubiquitin-protein ligase listerin	SPBC21D10.09c	179	5e-44	COG5219	pfam13639	zf-RING_2	Ring finger domain.	GO:0051865|protein autoubiquitination;	.	GO:0016874|ligase activity;GO:0061630|ubiquitin protein ligase activity;GO:0008270|zinc ion binding;	.	.
oar_circ_0000396	0	2	0	0.259949	0	0	0	1.18697	0.42538	NA	up	no	NC_019458.2:125205645..125219432:+	gene1725	gi|802996433|ref|XP_004002841.2|	8794	0	PREDICTED: E3 ubiquitin-protein ligase listerin [Ovis aries]	gi|548449215|ref|XM_005674720.1|	7435	0	PREDICTED: Capra hircus listerin E3 ubiquitin protein ligase 1 (LTN1), mRNA	O94822	3057	0	E3 ubiquitin-protein ligase listerin	SPBC21D10.09c	179	5e-44	COG5219	pfam13639	zf-RING_2	Ring finger domain.	GO:0051865|protein autoubiquitination;	.	GO:0016874|ligase activity;GO:0061630|ubiquitin protein ligase activity;GO:0008270|zinc ion binding;	.	.
oar_circ_0000397	0	0	0	0.891103	2	3	0	-2.24915	0.157649	NA	down	no	NC_019458.2:125205645..125222946:+	gene1725	gi|802996433|ref|XP_004002841.2|	8794	0	PREDICTED: E3 ubiquitin-protein ligase listerin [Ovis aries]	gi|548449215|ref|XM_005674720.1|	7435	0	PREDICTED: Capra hircus listerin E3 ubiquitin protein ligase 1 (LTN1), mRNA	O94822	3057	0	E3 ubiquitin-protein ligase listerin	SPBC21D10.09c	179	5e-44	COG5219	pfam13639	zf-RING_2	Ring finger domain.	GO:0051865|protein autoubiquitination;	.	GO:0016874|ligase activity;GO:0061630|ubiquitin protein ligase activity;GO:0008270|zinc ion binding;	.	.
oar_circ_0000398	2	0	0	0.426371	0	0	0	1.32953	0.379624	NA	up	no	NC_019458.2:125220158..125226200:+	gene1725	gi|802996433|ref|XP_004002841.2|	8794	0	PREDICTED: E3 ubiquitin-protein ligase listerin [Ovis aries]	gi|548449215|ref|XM_005674720.1|	7435	0	PREDICTED: Capra hircus listerin E3 ubiquitin protein ligase 1 (LTN1), mRNA	O94822	3057	0	E3 ubiquitin-protein ligase listerin	SPBC21D10.09c	179	5e-44	COG5219	pfam13639	zf-RING_2	Ring finger domain.	GO:0051865|protein autoubiquitination;	.	GO:0016874|ligase activity;GO:0061630|ubiquitin protein ligase activity;GO:0008270|zinc ion binding;	.	.
oar_circ_0000399	0	0	2	0.244763	0	0	0	1.16974	0.431077	NA	up	no	NC_019458.2:125220158..125238498:+	gene1725	gi|802996433|ref|XP_004002841.2|	8794	0	PREDICTED: E3 ubiquitin-protein ligase listerin [Ovis aries]	gi|548449215|ref|XM_005674720.1|	7435	0	PREDICTED: Capra hircus listerin E3 ubiquitin protein ligase 1 (LTN1), mRNA	O94822	3057	0	E3 ubiquitin-protein ligase listerin	SPBC21D10.09c	179	5e-44	COG5219	pfam13639	zf-RING_2	Ring finger domain.	GO:0051865|protein autoubiquitination;	.	GO:0016874|ligase activity;GO:0061630|ubiquitin protein ligase activity;GO:0008270|zinc ion binding;	.	.
oar_circ_0000402	0	4	10	3.33718	4	3	2	0.143574	0.906539	0.999963	up	no	NC_019458.2:127347144..127349412:-	Null	.	.	.	.	.	.	.	.	.	.	.	.	.	.	.	.	.	.	.	.	.	.	.	.
oar_circ_0000403	0	3	0	1.26668	3	0	2	-0.681766	0.661168	NA	down	no	NC_019458.2:127460377..127472976:+	gene1730	gi|426217205|ref|XP_004002844.1|	4165	0	PREDICTED: A disintegrin and metalloproteinase with thrombospondin motifs 5 isoform X1 [Ovis aries]	gi|594105504|ref|XM_006075643.1|	5276	0	PREDICTED: Bubalus bubalis ADAM metallopeptidase with thrombospondin type 1 motif, 5 (ADAMTS5), mRNA	Q9UNA0	1466	0	A disintegrin and metalloproteinase with thrombospondin motifs 5	.	.	.	.	pfam05986	ADAM_spacer1	ADAM-TS Spacer 1. This family represents the Spacer-1 region from the ADAM-TS family of metalloproteinases.	GO:0042742|defense response to bacterium;GO:0022617|extracellular matrix disassembly;GO:0036066|protein O-linked fucosylation;GO:0006508|proteolysis;GO:0044691|tooth eruption;	GO:0005788|endoplasmic reticulum lumen;GO:0005576|extracellular region;GO:0005615|extracellular space;GO:0005578|proteinaceous extracellular matrix;	GO:0050840|extracellular matrix binding;GO:0008201|heparin binding;GO:0005178|integrin binding;GO:0004222|metalloendopeptidase activity;GO:0008237|metallopeptidase activity;GO:0008270|zinc ion binding;	K08620	ADAMTS5; a disintegrin and metalloproteinase with thrombospondin motifs 5 [EC:3.4.24.-]
oar_circ_0000404	0	3	0	0.389924	0	0	0	1.32957	0.379611	NA	up	no	NC_019458.2:127460377..127483026:+	gene1730	gi|426217205|ref|XP_004002844.1|	4165	0	PREDICTED: A disintegrin and metalloproteinase with thrombospondin motifs 5 isoform X1 [Ovis aries]	gi|594105504|ref|XM_006075643.1|	5276	0	PREDICTED: Bubalus bubalis ADAM metallopeptidase with thrombospondin type 1 motif, 5 (ADAMTS5), mRNA	Q9UNA0	1466	0	A disintegrin and metalloproteinase with thrombospondin motifs 5	.	.	.	.	pfam05986	ADAM_spacer1	ADAM-TS Spacer 1. This family represents the Spacer-1 region from the ADAM-TS family of metalloproteinases.	GO:0042742|defense response to bacterium;GO:0022617|extracellular matrix disassembly;GO:0036066|protein O-linked fucosylation;GO:0006508|proteolysis;GO:0044691|tooth eruption;	GO:0005788|endoplasmic reticulum lumen;GO:0005576|extracellular region;GO:0005615|extracellular space;GO:0005578|proteinaceous extracellular matrix;	GO:0050840|extracellular matrix binding;GO:0008201|heparin binding;GO:0005178|integrin binding;GO:0004222|metalloendopeptidase activity;GO:0008237|metallopeptidase activity;GO:0008270|zinc ion binding;	K08620	ADAMTS5; a disintegrin and metalloproteinase with thrombospondin motifs 5 [EC:3.4.24.-]
oar_circ_0000407	0	4	6	3.04596	0	6	4	-0.366088	0.780389	0.999963	down	no	NC_019458.2:128329213..128394927:+	gene1734	gi|742112079|ref|XP_010836751.1|	3461	0	PREDICTED: amyloid beta A4 protein isoform X1 [Bison bison bison]	gi|548449235|ref|XM_005674723.1|	3236	0	PREDICTED: Capra hircus amyloid beta (A4) precursor protein (APP), transcript variant X1, mRNA	P79307	730	0	Amyloid beta A4 protein	.	.	.	.	pfam12925	APP_E2	E2 domain of amyloid precursor protein. The E2 domain is the largest of the conserved domains of the amyloid precursor protein. The structure of E2 consists of two coiled-coil sub-structures connected through a continuous helix, and bears an unexpected resemblance to the spectrin family of protein structures.E 2 can reversibly dimerise in solution, and the dimerization occurs along the longest di…	GO:0008344|adult locomotory behavior;GO:0006915|apoptotic process;GO:0008088|axon cargo transport;GO:0016199|axon midline choice point recognition;GO:0007409|axonogenesis;GO:0007155|cell adhesion;GO:0006878|cellular copper ion homeostasis;GO:0048669|collateral sprouting in absence of injury;GO:0016358|dendrite development;GO:0006897|endocytosis;GO:0030198|extracellular matrix organization;GO:0035…	GO:0030424|axon;GO:0005905|coated pit;GO:0005737|cytoplasm;GO:0005794|Golgi apparatus;GO:0016021|integral component of membrane;	GO:0003677|DNA binding;GO:0008201|heparin binding;GO:0004867|serine-type endopeptidase inhibitor activity;GO:0046914|transition metal ion binding;	K04520	APP; amyloid beta A4 protein
oar_circ_0000409	2	0	0	0.426371	0	0	0	1.32953	0.379624	NA	up	no	NC_019458.2:128329213..128479915:+	gene1734	gi|742112079|ref|XP_010836751.1|	3461	0	PREDICTED: amyloid beta A4 protein isoform X1 [Bison bison bison]	gi|548449235|ref|XM_005674723.1|	3236	0	PREDICTED: Capra hircus amyloid beta (A4) precursor protein (APP), transcript variant X1, mRNA	P79307	730	0	Amyloid beta A4 protein	.	.	.	.	pfam12925	APP_E2	E2 domain of amyloid precursor protein. The E2 domain is the largest of the conserved domains of the amyloid precursor protein. The structure of E2 consists of two coiled-coil sub-structures connected through a continuous helix, and bears an unexpected resemblance to the spectrin family of protein structures.E 2 can reversibly dimerise in solution, and the dimerization occurs along the longest di…	GO:0008344|adult locomotory behavior;GO:0006915|apoptotic process;GO:0008088|axon cargo transport;GO:0016199|axon midline choice point recognition;GO:0007409|axonogenesis;GO:0007155|cell adhesion;GO:0006878|cellular copper ion homeostasis;GO:0048669|collateral sprouting in absence of injury;GO:0016358|dendrite development;GO:0006897|endocytosis;GO:0030198|extracellular matrix organization;GO:0035…	GO:0030424|axon;GO:0005905|coated pit;GO:0005737|cytoplasm;GO:0005794|Golgi apparatus;GO:0016021|integral component of membrane;	GO:0003677|DNA binding;GO:0008201|heparin binding;GO:0004867|serine-type endopeptidase inhibitor activity;GO:0046914|transition metal ion binding;	K04520	APP; amyloid beta A4 protein
oar_circ_0000410	0	0	3	1.43105	2	2	2	-0.970325	0.517559	NA	down	no	NC_019458.2:128329213..128506882:+	gene1734	gi|742112079|ref|XP_010836751.1|	3461	0	PREDICTED: amyloid beta A4 protein isoform X1 [Bison bison bison]	gi|548449235|ref|XM_005674723.1|	3236	0	PREDICTED: Capra hircus amyloid beta (A4) precursor protein (APP), transcript variant X1, mRNA	P79307	730	0	Amyloid beta A4 protein	.	.	.	.	pfam12925	APP_E2	E2 domain of amyloid precursor protein. The E2 domain is the largest of the conserved domains of the amyloid precursor protein. The structure of E2 consists of two coiled-coil sub-structures connected through a continuous helix, and bears an unexpected resemblance to the spectrin family of protein structures.E 2 can reversibly dimerise in solution, and the dimerization occurs along the longest di…	GO:0008344|adult locomotory behavior;GO:0006915|apoptotic process;GO:0008088|axon cargo transport;GO:0016199|axon midline choice point recognition;GO:0007409|axonogenesis;GO:0007155|cell adhesion;GO:0006878|cellular copper ion homeostasis;GO:0048669|collateral sprouting in absence of injury;GO:0016358|dendrite development;GO:0006897|endocytosis;GO:0030198|extracellular matrix organization;GO:0035…	GO:0030424|axon;GO:0005905|coated pit;GO:0005737|cytoplasm;GO:0005794|Golgi apparatus;GO:0016021|integral component of membrane;	GO:0003677|DNA binding;GO:0008201|heparin binding;GO:0004867|serine-type endopeptidase inhibitor activity;GO:0046914|transition metal ion binding;	K04520	APP; amyloid beta A4 protein
oar_circ_0000412	0	0	0	0.361542	0	2	0	-1.3392	0.374749	NA	down	no	NC_019458.2:128358667..128454017:+	gene1734	gi|742112079|ref|XP_010836751.1|	3461	0	PREDICTED: amyloid beta A4 protein isoform X1 [Bison bison bison]	gi|548449235|ref|XM_005674723.1|	3236	0	PREDICTED: Capra hircus amyloid beta (A4) precursor protein (APP), transcript variant X1, mRNA	P79307	730	0	Amyloid beta A4 protein	.	.	.	.	pfam12925	APP_E2	E2 domain of amyloid precursor protein. The E2 domain is the largest of the conserved domains of the amyloid precursor protein. The structure of E2 consists of two coiled-coil sub-structures connected through a continuous helix, and bears an unexpected resemblance to the spectrin family of protein structures.E 2 can reversibly dimerise in solution, and the dimerization occurs along the longest di…	GO:0008344|adult locomotory behavior;GO:0006915|apoptotic process;GO:0008088|axon cargo transport;GO:0016199|axon midline choice point recognition;GO:0007409|axonogenesis;GO:0007155|cell adhesion;GO:0006878|cellular copper ion homeostasis;GO:0048669|collateral sprouting in absence of injury;GO:0016358|dendrite development;GO:0006897|endocytosis;GO:0030198|extracellular matrix organization;GO:0035…	GO:0030424|axon;GO:0005905|coated pit;GO:0005737|cytoplasm;GO:0005794|Golgi apparatus;GO:0016021|integral component of membrane;	GO:0003677|DNA binding;GO:0008201|heparin binding;GO:0004867|serine-type endopeptidase inhibitor activity;GO:0046914|transition metal ion binding;	K04520	APP; amyloid beta A4 protein
oar_circ_0000413	0	0	0	0.348789	2	0	0	-1.32922	0.377798	NA	down	no	NC_019458.2:128358667..128479915:+	gene1734	gi|742112079|ref|XP_010836751.1|	3461	0	PREDICTED: amyloid beta A4 protein isoform X1 [Bison bison bison]	gi|548449235|ref|XM_005674723.1|	3236	0	PREDICTED: Capra hircus amyloid beta (A4) precursor protein (APP), transcript variant X1, mRNA	P79307	730	0	Amyloid beta A4 protein	.	.	.	.	pfam12925	APP_E2	E2 domain of amyloid precursor protein. The E2 domain is the largest of the conserved domains of the amyloid precursor protein. The structure of E2 consists of two coiled-coil sub-structures connected through a continuous helix, and bears an unexpected resemblance to the spectrin family of protein structures.E 2 can reversibly dimerise in solution, and the dimerization occurs along the longest di…	GO:0008344|adult locomotory behavior;GO:0006915|apoptotic process;GO:0008088|axon cargo transport;GO:0016199|axon midline choice point recognition;GO:0007409|axonogenesis;GO:0007155|cell adhesion;GO:0006878|cellular copper ion homeostasis;GO:0048669|collateral sprouting in absence of injury;GO:0016358|dendrite development;GO:0006897|endocytosis;GO:0030198|extracellular matrix organization;GO:0035…	GO:0030424|axon;GO:0005905|coated pit;GO:0005737|cytoplasm;GO:0005794|Golgi apparatus;GO:0016021|integral component of membrane;	GO:0003677|DNA binding;GO:0008201|heparin binding;GO:0004867|serine-type endopeptidase inhibitor activity;GO:0046914|transition metal ion binding;	K04520	APP; amyloid beta A4 protein
oar_circ_0000414	0	21	6	6.12431	8	7	0	0.341466	0.768348	0.999963	up	no	NC_019458.2:128392226..128394927:+	gene1734	gi|742112079|ref|XP_010836751.1|	3461	0	PREDICTED: amyloid beta A4 protein isoform X1 [Bison bison bison]	gi|548449235|ref|XM_005674723.1|	3236	0	PREDICTED: Capra hircus amyloid beta (A4) precursor protein (APP), transcript variant X1, mRNA	P79307	730	0	Amyloid beta A4 protein	.	.	.	.	pfam12925	APP_E2	E2 domain of amyloid precursor protein. The E2 domain is the largest of the conserved domains of the amyloid precursor protein. The structure of E2 consists of two coiled-coil sub-structures connected through a continuous helix, and bears an unexpected resemblance to the spectrin family of protein structures.E 2 can reversibly dimerise in solution, and the dimerization occurs along the longest di…	GO:0008344|adult locomotory behavior;GO:0006915|apoptotic process;GO:0008088|axon cargo transport;GO:0016199|axon midline choice point recognition;GO:0007409|axonogenesis;GO:0007155|cell adhesion;GO:0006878|cellular copper ion homeostasis;GO:0048669|collateral sprouting in absence of injury;GO:0016358|dendrite development;GO:0006897|endocytosis;GO:0030198|extracellular matrix organization;GO:0035…	GO:0030424|axon;GO:0005905|coated pit;GO:0005737|cytoplasm;GO:0005794|Golgi apparatus;GO:0016021|integral component of membrane;	GO:0003677|DNA binding;GO:0008201|heparin binding;GO:0004867|serine-type endopeptidase inhibitor activity;GO:0046914|transition metal ion binding;	K04520	APP; amyloid beta A4 protein
oar_circ_0000415	0	0	0	0.884726	3	2	0	-2.24054	0.159208	NA	down	no	NC_019458.2:128392226..128435980:+	gene1734	gi|742112079|ref|XP_010836751.1|	3461	0	PREDICTED: amyloid beta A4 protein isoform X1 [Bison bison bison]	gi|548449235|ref|XM_005674723.1|	3236	0	PREDICTED: Capra hircus amyloid beta (A4) precursor protein (APP), transcript variant X1, mRNA	P79307	730	0	Amyloid beta A4 protein	.	.	.	.	pfam12925	APP_E2	E2 domain of amyloid precursor protein. The E2 domain is the largest of the conserved domains of the amyloid precursor protein. The structure of E2 consists of two coiled-coil sub-structures connected through a continuous helix, and bears an unexpected resemblance to the spectrin family of protein structures.E 2 can reversibly dimerise in solution, and the dimerization occurs along the longest di…	GO:0008344|adult locomotory behavior;GO:0006915|apoptotic process;GO:0008088|axon cargo transport;GO:0016199|axon midline choice point recognition;GO:0007409|axonogenesis;GO:0007155|cell adhesion;GO:0006878|cellular copper ion homeostasis;GO:0048669|collateral sprouting in absence of injury;GO:0016358|dendrite development;GO:0006897|endocytosis;GO:0030198|extracellular matrix organization;GO:0035…	GO:0030424|axon;GO:0005905|coated pit;GO:0005737|cytoplasm;GO:0005794|Golgi apparatus;GO:0016021|integral component of membrane;	GO:0003677|DNA binding;GO:0008201|heparin binding;GO:0004867|serine-type endopeptidase inhibitor activity;GO:0046914|transition metal ion binding;	K04520	APP; amyloid beta A4 protein
oar_circ_0000416	0	12	5	3.0627	2	3	0	1.02042	0.441326	0.999963	up	no	NC_019458.2:128392226..128479915:+	gene1734	gi|742112079|ref|XP_010836751.1|	3461	0	PREDICTED: amyloid beta A4 protein isoform X1 [Bison bison bison]	gi|548449235|ref|XM_005674723.1|	3236	0	PREDICTED: Capra hircus amyloid beta (A4) precursor protein (APP), transcript variant X1, mRNA	P79307	730	0	Amyloid beta A4 protein	.	.	.	.	pfam12925	APP_E2	E2 domain of amyloid precursor protein. The E2 domain is the largest of the conserved domains of the amyloid precursor protein. The structure of E2 consists of two coiled-coil sub-structures connected through a continuous helix, and bears an unexpected resemblance to the spectrin family of protein structures.E 2 can reversibly dimerise in solution, and the dimerization occurs along the longest di…	GO:0008344|adult locomotory behavior;GO:0006915|apoptotic process;GO:0008088|axon cargo transport;GO:0016199|axon midline choice point recognition;GO:0007409|axonogenesis;GO:0007155|cell adhesion;GO:0006878|cellular copper ion homeostasis;GO:0048669|collateral sprouting in absence of injury;GO:0016358|dendrite development;GO:0006897|endocytosis;GO:0030198|extracellular matrix organization;GO:0035…	GO:0030424|axon;GO:0005905|coated pit;GO:0005737|cytoplasm;GO:0005794|Golgi apparatus;GO:0016021|integral component of membrane;	GO:0003677|DNA binding;GO:0008201|heparin binding;GO:0004867|serine-type endopeptidase inhibitor activity;GO:0046914|transition metal ion binding;	K04520	APP; amyloid beta A4 protein
oar_circ_0000417	2	2	3	2.64693	4	3	2	-0.498952	0.68515	0.999963	down	no	NC_019458.2:128392226..128506882:+	gene1734	gi|742112079|ref|XP_010836751.1|	3461	0	PREDICTED: amyloid beta A4 protein isoform X1 [Bison bison bison]	gi|548449235|ref|XM_005674723.1|	3236	0	PREDICTED: Capra hircus amyloid beta (A4) precursor protein (APP), transcript variant X1, mRNA	P79307	730	0	Amyloid beta A4 protein	.	.	.	.	pfam12925	APP_E2	E2 domain of amyloid precursor protein. The E2 domain is the largest of the conserved domains of the amyloid precursor protein. The structure of E2 consists of two coiled-coil sub-structures connected through a continuous helix, and bears an unexpected resemblance to the spectrin family of protein structures.E 2 can reversibly dimerise in solution, and the dimerization occurs along the longest di…	GO:0008344|adult locomotory behavior;GO:0006915|apoptotic process;GO:0008088|axon cargo transport;GO:0016199|axon midline choice point recognition;GO:0007409|axonogenesis;GO:0007155|cell adhesion;GO:0006878|cellular copper ion homeostasis;GO:0048669|collateral sprouting in absence of injury;GO:0016358|dendrite development;GO:0006897|endocytosis;GO:0030198|extracellular matrix organization;GO:0035…	GO:0030424|axon;GO:0005905|coated pit;GO:0005737|cytoplasm;GO:0005794|Golgi apparatus;GO:0016021|integral component of membrane;	GO:0003677|DNA binding;GO:0008201|heparin binding;GO:0004867|serine-type endopeptidase inhibitor activity;GO:0046914|transition metal ion binding;	K04520	APP; amyloid beta A4 protein
oar_circ_0000418	2	0	5	1.76136	0	4	0	0.34457	0.819258	NA	up	no	NC_019458.2:128392226..128543701:+	gene1734	gi|742112079|ref|XP_010836751.1|	3461	0	PREDICTED: amyloid beta A4 protein isoform X1 [Bison bison bison]	gi|548449235|ref|XM_005674723.1|	3236	0	PREDICTED: Capra hircus amyloid beta (A4) precursor protein (APP), transcript variant X1, mRNA	P79307	730	0	Amyloid beta A4 protein	.	.	.	.	pfam12925	APP_E2	E2 domain of amyloid precursor protein. The E2 domain is the largest of the conserved domains of the amyloid precursor protein. The structure of E2 consists of two coiled-coil sub-structures connected through a continuous helix, and bears an unexpected resemblance to the spectrin family of protein structures.E 2 can reversibly dimerise in solution, and the dimerization occurs along the longest di…	GO:0008344|adult locomotory behavior;GO:0006915|apoptotic process;GO:0008088|axon cargo transport;GO:0016199|axon midline choice point recognition;GO:0007409|axonogenesis;GO:0007155|cell adhesion;GO:0006878|cellular copper ion homeostasis;GO:0048669|collateral sprouting in absence of injury;GO:0016358|dendrite development;GO:0006897|endocytosis;GO:0030198|extracellular matrix organization;GO:0035…	GO:0030424|axon;GO:0005905|coated pit;GO:0005737|cytoplasm;GO:0005794|Golgi apparatus;GO:0016021|integral component of membrane;	GO:0003677|DNA binding;GO:0008201|heparin binding;GO:0004867|serine-type endopeptidase inhibitor activity;GO:0046914|transition metal ion binding;	K04520	APP; amyloid beta A4 protein
oar_circ_0000419	0	0	0	0.361542	0	2	0	-1.3392	0.374749	NA	down	no	NC_019458.2:128392226..128562813:+	gene1734	gi|742112079|ref|XP_010836751.1|	3461	0	PREDICTED: amyloid beta A4 protein isoform X1 [Bison bison bison]	gi|548449235|ref|XM_005674723.1|	3236	0	PREDICTED: Capra hircus amyloid beta (A4) precursor protein (APP), transcript variant X1, mRNA	P79307	730	0	Amyloid beta A4 protein	.	.	.	.	pfam12925	APP_E2	E2 domain of amyloid precursor protein. The E2 domain is the largest of the conserved domains of the amyloid precursor protein. The structure of E2 consists of two coiled-coil sub-structures connected through a continuous helix, and bears an unexpected resemblance to the spectrin family of protein structures.E 2 can reversibly dimerise in solution, and the dimerization occurs along the longest di…	GO:0008344|adult locomotory behavior;GO:0006915|apoptotic process;GO:0008088|axon cargo transport;GO:0016199|axon midline choice point recognition;GO:0007409|axonogenesis;GO:0007155|cell adhesion;GO:0006878|cellular copper ion homeostasis;GO:0048669|collateral sprouting in absence of injury;GO:0016358|dendrite development;GO:0006897|endocytosis;GO:0030198|extracellular matrix organization;GO:0035…	GO:0030424|axon;GO:0005905|coated pit;GO:0005737|cytoplasm;GO:0005794|Golgi apparatus;GO:0016021|integral component of membrane;	GO:0003677|DNA binding;GO:0008201|heparin binding;GO:0004867|serine-type endopeptidase inhibitor activity;GO:0046914|transition metal ion binding;	K04520	APP; amyloid beta A4 protein
oar_circ_0000420	0	2	0	0.621491	0	2	0	-0.183839	0.906981	NA	down	no	NC_019458.2:128435778..128470007:+	gene1734	gi|742112079|ref|XP_010836751.1|	3461	0	PREDICTED: amyloid beta A4 protein isoform X1 [Bison bison bison]	gi|548449235|ref|XM_005674723.1|	3236	0	PREDICTED: Capra hircus amyloid beta (A4) precursor protein (APP), transcript variant X1, mRNA	P79307	730	0	Amyloid beta A4 protein	.	.	.	.	pfam12925	APP_E2	E2 domain of amyloid precursor protein. The E2 domain is the largest of the conserved domains of the amyloid precursor protein. The structure of E2 consists of two coiled-coil sub-structures connected through a continuous helix, and bears an unexpected resemblance to the spectrin family of protein structures.E 2 can reversibly dimerise in solution, and the dimerization occurs along the longest di…	GO:0008344|adult locomotory behavior;GO:0006915|apoptotic process;GO:0008088|axon cargo transport;GO:0016199|axon midline choice point recognition;GO:0007409|axonogenesis;GO:0007155|cell adhesion;GO:0006878|cellular copper ion homeostasis;GO:0048669|collateral sprouting in absence of injury;GO:0016358|dendrite development;GO:0006897|endocytosis;GO:0030198|extracellular matrix organization;GO:0035…	GO:0030424|axon;GO:0005905|coated pit;GO:0005737|cytoplasm;GO:0005794|Golgi apparatus;GO:0016021|integral component of membrane;	GO:0003677|DNA binding;GO:0008201|heparin binding;GO:0004867|serine-type endopeptidase inhibitor activity;GO:0046914|transition metal ion binding;	K04520	APP; amyloid beta A4 protein
oar_circ_0000421	2	5	9	3.06161	0	0	5	1.02405	0.436769	0.999963	up	no	NC_019458.2:128435778..128479915:+	gene1734	gi|742112079|ref|XP_010836751.1|	3461	0	PREDICTED: amyloid beta A4 protein isoform X1 [Bison bison bison]	gi|548449235|ref|XM_005674723.1|	3236	0	PREDICTED: Capra hircus amyloid beta (A4) precursor protein (APP), transcript variant X1, mRNA	P79307	730	0	Amyloid beta A4 protein	.	.	.	.	pfam12925	APP_E2	E2 domain of amyloid precursor protein. The E2 domain is the largest of the conserved domains of the amyloid precursor protein. The structure of E2 consists of two coiled-coil sub-structures connected through a continuous helix, and bears an unexpected resemblance to the spectrin family of protein structures.E 2 can reversibly dimerise in solution, and the dimerization occurs along the longest di…	GO:0008344|adult locomotory behavior;GO:0006915|apoptotic process;GO:0008088|axon cargo transport;GO:0016199|axon midline choice point recognition;GO:0007409|axonogenesis;GO:0007155|cell adhesion;GO:0006878|cellular copper ion homeostasis;GO:0048669|collateral sprouting in absence of injury;GO:0016358|dendrite development;GO:0006897|endocytosis;GO:0030198|extracellular matrix organization;GO:0035…	GO:0030424|axon;GO:0005905|coated pit;GO:0005737|cytoplasm;GO:0005794|Golgi apparatus;GO:0016021|integral component of membrane;	GO:0003677|DNA binding;GO:0008201|heparin binding;GO:0004867|serine-type endopeptidase inhibitor activity;GO:0046914|transition metal ion binding;	K04520	APP; amyloid beta A4 protein
oar_circ_0000422	2	3	0	1.35861	0	3	0	0.352147	0.820102	NA	up	no	NC_019458.2:128435778..128506882:+	gene1734	gi|742112079|ref|XP_010836751.1|	3461	0	PREDICTED: amyloid beta A4 protein isoform X1 [Bison bison bison]	gi|548449235|ref|XM_005674723.1|	3236	0	PREDICTED: Capra hircus amyloid beta (A4) precursor protein (APP), transcript variant X1, mRNA	P79307	730	0	Amyloid beta A4 protein	.	.	.	.	pfam12925	APP_E2	E2 domain of amyloid precursor protein. The E2 domain is the largest of the conserved domains of the amyloid precursor protein. The structure of E2 consists of two coiled-coil sub-structures connected through a continuous helix, and bears an unexpected resemblance to the spectrin family of protein structures.E 2 can reversibly dimerise in solution, and the dimerization occurs along the longest di…	GO:0008344|adult locomotory behavior;GO:0006915|apoptotic process;GO:0008088|axon cargo transport;GO:0016199|axon midline choice point recognition;GO:0007409|axonogenesis;GO:0007155|cell adhesion;GO:0006878|cellular copper ion homeostasis;GO:0048669|collateral sprouting in absence of injury;GO:0016358|dendrite development;GO:0006897|endocytosis;GO:0030198|extracellular matrix organization;GO:0035…	GO:0030424|axon;GO:0005905|coated pit;GO:0005737|cytoplasm;GO:0005794|Golgi apparatus;GO:0016021|integral component of membrane;	GO:0003677|DNA binding;GO:0008201|heparin binding;GO:0004867|serine-type endopeptidase inhibitor activity;GO:0046914|transition metal ion binding;	K04520	APP; amyloid beta A4 protein
oar_circ_0000424	10	30	34	19.7321	21	11	22	0.105733	0.862611	0.999963	up	no	NC_019458.2:128453850..128479915:+	gene1734	gi|742112079|ref|XP_010836751.1|	3461	0	PREDICTED: amyloid beta A4 protein isoform X1 [Bison bison bison]	gi|548449235|ref|XM_005674723.1|	3236	0	PREDICTED: Capra hircus amyloid beta (A4) precursor protein (APP), transcript variant X1, mRNA	P79307	730	0	Amyloid beta A4 protein	.	.	.	.	pfam12925	APP_E2	E2 domain of amyloid precursor protein. The E2 domain is the largest of the conserved domains of the amyloid precursor protein. The structure of E2 consists of two coiled-coil sub-structures connected through a continuous helix, and bears an unexpected resemblance to the spectrin family of protein structures.E 2 can reversibly dimerise in solution, and the dimerization occurs along the longest di…	GO:0008344|adult locomotory behavior;GO:0006915|apoptotic process;GO:0008088|axon cargo transport;GO:0016199|axon midline choice point recognition;GO:0007409|axonogenesis;GO:0007155|cell adhesion;GO:0006878|cellular copper ion homeostasis;GO:0048669|collateral sprouting in absence of injury;GO:0016358|dendrite development;GO:0006897|endocytosis;GO:0030198|extracellular matrix organization;GO:0035…	GO:0030424|axon;GO:0005905|coated pit;GO:0005737|cytoplasm;GO:0005794|Golgi apparatus;GO:0016021|integral component of membrane;	GO:0003677|DNA binding;GO:0008201|heparin binding;GO:0004867|serine-type endopeptidase inhibitor activity;GO:0046914|transition metal ion binding;	K04520	APP; amyloid beta A4 protein
oar_circ_0000425	4	0	9	3.90121	4	3	4	-0.00433767	0.997072	0.999963	down	no	NC_019458.2:128453850..128502961:+	gene1734	gi|742112079|ref|XP_010836751.1|	3461	0	PREDICTED: amyloid beta A4 protein isoform X1 [Bison bison bison]	gi|548449235|ref|XM_005674723.1|	3236	0	PREDICTED: Capra hircus amyloid beta (A4) precursor protein (APP), transcript variant X1, mRNA	P79307	730	0	Amyloid beta A4 protein	.	.	.	.	pfam12925	APP_E2	E2 domain of amyloid precursor protein. The E2 domain is the largest of the conserved domains of the amyloid precursor protein. The structure of E2 consists of two coiled-coil sub-structures connected through a continuous helix, and bears an unexpected resemblance to the spectrin family of protein structures.E 2 can reversibly dimerise in solution, and the dimerization occurs along the longest di…	GO:0008344|adult locomotory behavior;GO:0006915|apoptotic process;GO:0008088|axon cargo transport;GO:0016199|axon midline choice point recognition;GO:0007409|axonogenesis;GO:0007155|cell adhesion;GO:0006878|cellular copper ion homeostasis;GO:0048669|collateral sprouting in absence of injury;GO:0016358|dendrite development;GO:0006897|endocytosis;GO:0030198|extracellular matrix organization;GO:0035…	GO:0030424|axon;GO:0005905|coated pit;GO:0005737|cytoplasm;GO:0005794|Golgi apparatus;GO:0016021|integral component of membrane;	GO:0003677|DNA binding;GO:0008201|heparin binding;GO:0004867|serine-type endopeptidase inhibitor activity;GO:0046914|transition metal ion binding;	K04520	APP; amyloid beta A4 protein
oar_circ_0000426	20	20	43	20.4497	12	11	24	0.520423	0.398578	0.999963	up	no	NC_019458.2:128453850..128506882:+	gene1734	gi|742112079|ref|XP_010836751.1|	3461	0	PREDICTED: amyloid beta A4 protein isoform X1 [Bison bison bison]	gi|548449235|ref|XM_005674723.1|	3236	0	PREDICTED: Capra hircus amyloid beta (A4) precursor protein (APP), transcript variant X1, mRNA	P79307	730	0	Amyloid beta A4 protein	.	.	.	.	pfam12925	APP_E2	E2 domain of amyloid precursor protein. The E2 domain is the largest of the conserved domains of the amyloid precursor protein. The structure of E2 consists of two coiled-coil sub-structures connected through a continuous helix, and bears an unexpected resemblance to the spectrin family of protein structures.E 2 can reversibly dimerise in solution, and the dimerization occurs along the longest di…	GO:0008344|adult locomotory behavior;GO:0006915|apoptotic process;GO:0008088|axon cargo transport;GO:0016199|axon midline choice point recognition;GO:0007409|axonogenesis;GO:0007155|cell adhesion;GO:0006878|cellular copper ion homeostasis;GO:0048669|collateral sprouting in absence of injury;GO:0016358|dendrite development;GO:0006897|endocytosis;GO:0030198|extracellular matrix organization;GO:0035…	GO:0030424|axon;GO:0005905|coated pit;GO:0005737|cytoplasm;GO:0005794|Golgi apparatus;GO:0016021|integral component of membrane;	GO:0003677|DNA binding;GO:0008201|heparin binding;GO:0004867|serine-type endopeptidase inhibitor activity;GO:0046914|transition metal ion binding;	K04520	APP; amyloid beta A4 protein
oar_circ_0000427	0	2	0	0.259949	0	0	0	1.18697	0.42538	NA	up	no	NC_019458.2:128453850..128543701:+	gene1734	gi|742112079|ref|XP_010836751.1|	3461	0	PREDICTED: amyloid beta A4 protein isoform X1 [Bison bison bison]	gi|548449235|ref|XM_005674723.1|	3236	0	PREDICTED: Capra hircus amyloid beta (A4) precursor protein (APP), transcript variant X1, mRNA	P79307	730	0	Amyloid beta A4 protein	.	.	.	.	pfam12925	APP_E2	E2 domain of amyloid precursor protein. The E2 domain is the largest of the conserved domains of the amyloid precursor protein. The structure of E2 consists of two coiled-coil sub-structures connected through a continuous helix, and bears an unexpected resemblance to the spectrin family of protein structures.E 2 can reversibly dimerise in solution, and the dimerization occurs along the longest di…	GO:0008344|adult locomotory behavior;GO:0006915|apoptotic process;GO:0008088|axon cargo transport;GO:0016199|axon midline choice point recognition;GO:0007409|axonogenesis;GO:0007155|cell adhesion;GO:0006878|cellular copper ion homeostasis;GO:0048669|collateral sprouting in absence of injury;GO:0016358|dendrite development;GO:0006897|endocytosis;GO:0030198|extracellular matrix organization;GO:0035…	GO:0030424|axon;GO:0005905|coated pit;GO:0005737|cytoplasm;GO:0005794|Golgi apparatus;GO:0016021|integral component of membrane;	GO:0003677|DNA binding;GO:0008201|heparin binding;GO:0004867|serine-type endopeptidase inhibitor activity;GO:0046914|transition metal ion binding;	K04520	APP; amyloid beta A4 protein
oar_circ_0000428	2	7	13	6.84036	5	9	8	-0.350985	0.702205	0.999963	down	no	NC_019458.2:128456700..128479915:+	gene1734	gi|742112079|ref|XP_010836751.1|	3461	0	PREDICTED: amyloid beta A4 protein isoform X1 [Bison bison bison]	gi|548449235|ref|XM_005674723.1|	3236	0	PREDICTED: Capra hircus amyloid beta (A4) precursor protein (APP), transcript variant X1, mRNA	P79307	730	0	Amyloid beta A4 protein	.	.	.	.	pfam12925	APP_E2	E2 domain of amyloid precursor protein. The E2 domain is the largest of the conserved domains of the amyloid precursor protein. The structure of E2 consists of two coiled-coil sub-structures connected through a continuous helix, and bears an unexpected resemblance to the spectrin family of protein structures.E 2 can reversibly dimerise in solution, and the dimerization occurs along the longest di…	GO:0008344|adult locomotory behavior;GO:0006915|apoptotic process;GO:0008088|axon cargo transport;GO:0016199|axon midline choice point recognition;GO:0007409|axonogenesis;GO:0007155|cell adhesion;GO:0006878|cellular copper ion homeostasis;GO:0048669|collateral sprouting in absence of injury;GO:0016358|dendrite development;GO:0006897|endocytosis;GO:0030198|extracellular matrix organization;GO:0035…	GO:0030424|axon;GO:0005905|coated pit;GO:0005737|cytoplasm;GO:0005794|Golgi apparatus;GO:0016021|integral component of membrane;	GO:0003677|DNA binding;GO:0008201|heparin binding;GO:0004867|serine-type endopeptidase inhibitor activity;GO:0046914|transition metal ion binding;	K04520	APP; amyloid beta A4 protein
oar_circ_0000429	0	0	4	1.01271	3	0	0	-0.0307148	0.984602	NA	down	no	NC_019458.2:128456700..128506882:+	gene1734	gi|742112079|ref|XP_010836751.1|	3461	0	PREDICTED: amyloid beta A4 protein isoform X1 [Bison bison bison]	gi|548449235|ref|XM_005674723.1|	3236	0	PREDICTED: Capra hircus amyloid beta (A4) precursor protein (APP), transcript variant X1, mRNA	P79307	730	0	Amyloid beta A4 protein	.	.	.	.	pfam12925	APP_E2	E2 domain of amyloid precursor protein. The E2 domain is the largest of the conserved domains of the amyloid precursor protein. The structure of E2 consists of two coiled-coil sub-structures connected through a continuous helix, and bears an unexpected resemblance to the spectrin family of protein structures.E 2 can reversibly dimerise in solution, and the dimerization occurs along the longest di…	GO:0008344|adult locomotory behavior;GO:0006915|apoptotic process;GO:0008088|axon cargo transport;GO:0016199|axon midline choice point recognition;GO:0007409|axonogenesis;GO:0007155|cell adhesion;GO:0006878|cellular copper ion homeostasis;GO:0048669|collateral sprouting in absence of injury;GO:0016358|dendrite development;GO:0006897|endocytosis;GO:0030198|extracellular matrix organization;GO:0035…	GO:0030424|axon;GO:0005905|coated pit;GO:0005737|cytoplasm;GO:0005794|Golgi apparatus;GO:0016021|integral component of membrane;	GO:0003677|DNA binding;GO:0008201|heparin binding;GO:0004867|serine-type endopeptidase inhibitor activity;GO:0046914|transition metal ion binding;	K04520	APP; amyloid beta A4 protein
oar_circ_0000430	8	37	58	30.3254	27	40	27	-0.263631	0.64109	0.999963	down	no	NC_019458.2:128469874..128479915:+	gene1734	gi|742112079|ref|XP_010836751.1|	3461	0	PREDICTED: amyloid beta A4 protein isoform X1 [Bison bison bison]	gi|548449235|ref|XM_005674723.1|	3236	0	PREDICTED: Capra hircus amyloid beta (A4) precursor protein (APP), transcript variant X1, mRNA	P79307	730	0	Amyloid beta A4 protein	.	.	.	.	pfam12925	APP_E2	E2 domain of amyloid precursor protein. The E2 domain is the largest of the conserved domains of the amyloid precursor protein. The structure of E2 consists of two coiled-coil sub-structures connected through a continuous helix, and bears an unexpected resemblance to the spectrin family of protein structures.E 2 can reversibly dimerise in solution, and the dimerization occurs along the longest di…	GO:0008344|adult locomotory behavior;GO:0006915|apoptotic process;GO:0008088|axon cargo transport;GO:0016199|axon midline choice point recognition;GO:0007409|axonogenesis;GO:0007155|cell adhesion;GO:0006878|cellular copper ion homeostasis;GO:0048669|collateral sprouting in absence of injury;GO:0016358|dendrite development;GO:0006897|endocytosis;GO:0030198|extracellular matrix organization;GO:0035…	GO:0030424|axon;GO:0005905|coated pit;GO:0005737|cytoplasm;GO:0005794|Golgi apparatus;GO:0016021|integral component of membrane;	GO:0003677|DNA binding;GO:0008201|heparin binding;GO:0004867|serine-type endopeptidase inhibitor activity;GO:0046914|transition metal ion binding;	K04520	APP; amyloid beta A4 protein
oar_circ_0000431	57	84	90	74.2255	58	82	86	-0.235001	0.51956	0.999963	down	no	NC_019458.2:128469874..128506882:+	gene1734	gi|742112079|ref|XP_010836751.1|	3461	0	PREDICTED: amyloid beta A4 protein isoform X1 [Bison bison bison]	gi|548449235|ref|XM_005674723.1|	3236	0	PREDICTED: Capra hircus amyloid beta (A4) precursor protein (APP), transcript variant X1, mRNA	P79307	730	0	Amyloid beta A4 protein	.	.	.	.	pfam12925	APP_E2	E2 domain of amyloid precursor protein. The E2 domain is the largest of the conserved domains of the amyloid precursor protein. The structure of E2 consists of two coiled-coil sub-structures connected through a continuous helix, and bears an unexpected resemblance to the spectrin family of protein structures.E 2 can reversibly dimerise in solution, and the dimerization occurs along the longest di…	GO:0008344|adult locomotory behavior;GO:0006915|apoptotic process;GO:0008088|axon cargo transport;GO:0016199|axon midline choice point recognition;GO:0007409|axonogenesis;GO:0007155|cell adhesion;GO:0006878|cellular copper ion homeostasis;GO:0048669|collateral sprouting in absence of injury;GO:0016358|dendrite development;GO:0006897|endocytosis;GO:0030198|extracellular matrix organization;GO:0035…	GO:0030424|axon;GO:0005905|coated pit;GO:0005737|cytoplasm;GO:0005794|Golgi apparatus;GO:0016021|integral component of membrane;	GO:0003677|DNA binding;GO:0008201|heparin binding;GO:0004867|serine-type endopeptidase inhibitor activity;GO:0046914|transition metal ion binding;	K04520	APP; amyloid beta A4 protein
oar_circ_0000432	0	3	0	1.0875	4	0	0	-0.429316	0.787052	NA	down	no	NC_019458.2:128469874..128543701:+	gene1734	gi|742112079|ref|XP_010836751.1|	3461	0	PREDICTED: amyloid beta A4 protein isoform X1 [Bison bison bison]	gi|548449235|ref|XM_005674723.1|	3236	0	PREDICTED: Capra hircus amyloid beta (A4) precursor protein (APP), transcript variant X1, mRNA	P79307	730	0	Amyloid beta A4 protein	.	.	.	.	pfam12925	APP_E2	E2 domain of amyloid precursor protein. The E2 domain is the largest of the conserved domains of the amyloid precursor protein. The structure of E2 consists of two coiled-coil sub-structures connected through a continuous helix, and bears an unexpected resemblance to the spectrin family of protein structures.E 2 can reversibly dimerise in solution, and the dimerization occurs along the longest di…	GO:0008344|adult locomotory behavior;GO:0006915|apoptotic process;GO:0008088|axon cargo transport;GO:0016199|axon midline choice point recognition;GO:0007409|axonogenesis;GO:0007155|cell adhesion;GO:0006878|cellular copper ion homeostasis;GO:0048669|collateral sprouting in absence of injury;GO:0016358|dendrite development;GO:0006897|endocytosis;GO:0030198|extracellular matrix organization;GO:0035…	GO:0030424|axon;GO:0005905|coated pit;GO:0005737|cytoplasm;GO:0005794|Golgi apparatus;GO:0016021|integral component of membrane;	GO:0003677|DNA binding;GO:0008201|heparin binding;GO:0004867|serine-type endopeptidase inhibitor activity;GO:0046914|transition metal ion binding;	K04520	APP; amyloid beta A4 protein
oar_circ_0000434	0	3	2	0.996228	0	2	0	0.479534	0.761482	NA	up	no	NC_019458.2:128478290..128506882:+	gene1734	gi|742112079|ref|XP_010836751.1|	3461	0	PREDICTED: amyloid beta A4 protein isoform X1 [Bison bison bison]	gi|548449235|ref|XM_005674723.1|	3236	0	PREDICTED: Capra hircus amyloid beta (A4) precursor protein (APP), transcript variant X1, mRNA	P79307	730	0	Amyloid beta A4 protein	.	.	.	.	pfam12925	APP_E2	E2 domain of amyloid precursor protein. The E2 domain is the largest of the conserved domains of the amyloid precursor protein. The structure of E2 consists of two coiled-coil sub-structures connected through a continuous helix, and bears an unexpected resemblance to the spectrin family of protein structures.E 2 can reversibly dimerise in solution, and the dimerization occurs along the longest di…	GO:0008344|adult locomotory behavior;GO:0006915|apoptotic process;GO:0008088|axon cargo transport;GO:0016199|axon midline choice point recognition;GO:0007409|axonogenesis;GO:0007155|cell adhesion;GO:0006878|cellular copper ion homeostasis;GO:0048669|collateral sprouting in absence of injury;GO:0016358|dendrite development;GO:0006897|endocytosis;GO:0030198|extracellular matrix organization;GO:0035…	GO:0030424|axon;GO:0005905|coated pit;GO:0005737|cytoplasm;GO:0005794|Golgi apparatus;GO:0016021|integral component of membrane;	GO:0003677|DNA binding;GO:0008201|heparin binding;GO:0004867|serine-type endopeptidase inhibitor activity;GO:0046914|transition metal ion binding;	K04520	APP; amyloid beta A4 protein
oar_circ_0000435	2	4	0	0.946269	0	0	0	2.23086	0.161193	NA	up	no	NC_019458.2:128543480..128562813:+	gene1734	gi|742112079|ref|XP_010836751.1|	3461	0	PREDICTED: amyloid beta A4 protein isoform X1 [Bison bison bison]	gi|548449235|ref|XM_005674723.1|	3236	0	PREDICTED: Capra hircus amyloid beta (A4) precursor protein (APP), transcript variant X1, mRNA	P79307	730	0	Amyloid beta A4 protein	.	.	.	.	pfam12925	APP_E2	E2 domain of amyloid precursor protein. The E2 domain is the largest of the conserved domains of the amyloid precursor protein. The structure of E2 consists of two coiled-coil sub-structures connected through a continuous helix, and bears an unexpected resemblance to the spectrin family of protein structures.E 2 can reversibly dimerise in solution, and the dimerization occurs along the longest di…	GO:0008344|adult locomotory behavior;GO:0006915|apoptotic process;GO:0008088|axon cargo transport;GO:0016199|axon midline choice point recognition;GO:0007409|axonogenesis;GO:0007155|cell adhesion;GO:0006878|cellular copper ion homeostasis;GO:0048669|collateral sprouting in absence of injury;GO:0016358|dendrite development;GO:0006897|endocytosis;GO:0030198|extracellular matrix organization;GO:0035…	GO:0030424|axon;GO:0005905|coated pit;GO:0005737|cytoplasm;GO:0005794|Golgi apparatus;GO:0016021|integral component of membrane;	GO:0003677|DNA binding;GO:0008201|heparin binding;GO:0004867|serine-type endopeptidase inhibitor activity;GO:0046914|transition metal ion binding;	K04520	APP; amyloid beta A4 protein
oar_circ_0000436	0	0	2	0.775123	0	0	3	-0.493187	0.756316	NA	down	no	NC_019458.2:128743245..128765246:-	gene1739	gi|803006776|ref|XP_011963222.1|	1344	5e-179	PREDICTED: junctional adhesion molecule B isoform X1 [Ovis aries]	gi|556751735|ref|XM_005971204.1|	1335	0	PREDICTED: Pantholops hodgsonii junctional adhesion molecule 2 (JAM2), mRNA	P57087	437	3e-147	Junctional adhesion molecule B	.	.	.	.	pfam07679	I-set	Immunoglobulin I-set domain.	GO:0030198|extracellular matrix organization;GO:0050900|leukocyte migration;GO:0007162|negative regulation of cell adhesion;GO:0016337|single organismal cell-cell adhesion;	GO:0005923|bicellular tight junction;GO:0005887|integral component of plasma membrane;GO:0005886|plasma membrane;	.	K06735	JAM2; junctional adhesion molecule 2
oar_circ_0000437	0	0	0	0.353574	0	0	2	-1.33301	0.37664	NA	down	no	NC_019458.2:128743245..128773103:-	gene1739	gi|803006776|ref|XP_011963222.1|	1344	5e-179	PREDICTED: junctional adhesion molecule B isoform X1 [Ovis aries]	gi|556751735|ref|XM_005971204.1|	1335	0	PREDICTED: Pantholops hodgsonii junctional adhesion molecule 2 (JAM2), mRNA	P57087	437	3e-147	Junctional adhesion molecule B	.	.	.	.	pfam07679	I-set	Immunoglobulin I-set domain.	GO:0030198|extracellular matrix organization;GO:0050900|leukocyte migration;GO:0007162|negative regulation of cell adhesion;GO:0016337|single organismal cell-cell adhesion;	GO:0005923|bicellular tight junction;GO:0005887|integral component of plasma membrane;GO:0005886|plasma membrane;	.	K06735	JAM2; junctional adhesion molecule 2
oar_circ_0000438	0	7	0	2.69044	3	5	2	-0.703617	0.604473	0.999963	down	no	NC_019458.2:128753396..128759020:-	gene1739	gi|803006776|ref|XP_011963222.1|	1344	5e-179	PREDICTED: junctional adhesion molecule B isoform X1 [Ovis aries]	gi|556751735|ref|XM_005971204.1|	1335	0	PREDICTED: Pantholops hodgsonii junctional adhesion molecule 2 (JAM2), mRNA	P57087	437	3e-147	Junctional adhesion molecule B	.	.	.	.	pfam07679	I-set	Immunoglobulin I-set domain.	GO:0030198|extracellular matrix organization;GO:0050900|leukocyte migration;GO:0007162|negative regulation of cell adhesion;GO:0016337|single organismal cell-cell adhesion;	GO:0005923|bicellular tight junction;GO:0005887|integral component of plasma membrane;GO:0005886|plasma membrane;	.	K06735	JAM2; junctional adhesion molecule 2
oar_circ_0000439	4	0	6	3.53646	3	3	5	-0.267454	0.824796	0.999963	down	no	NC_019458.2:128753396..128764187:-	gene1739	gi|803006776|ref|XP_011963222.1|	1344	5e-179	PREDICTED: junctional adhesion molecule B isoform X1 [Ovis aries]	gi|556751735|ref|XM_005971204.1|	1335	0	PREDICTED: Pantholops hodgsonii junctional adhesion molecule 2 (JAM2), mRNA	P57087	437	3e-147	Junctional adhesion molecule B	.	.	.	.	pfam07679	I-set	Immunoglobulin I-set domain.	GO:0030198|extracellular matrix organization;GO:0050900|leukocyte migration;GO:0007162|negative regulation of cell adhesion;GO:0016337|single organismal cell-cell adhesion;	GO:0005923|bicellular tight junction;GO:0005887|integral component of plasma membrane;GO:0005886|plasma membrane;	.	K06735	JAM2; junctional adhesion molecule 2
oar_circ_0000441	111	239	146	139.192	97	134	144	0.123209	0.712969	0.999963	up	no	NC_019458.2:128753396..128765246:-	gene1739	gi|803006776|ref|XP_011963222.1|	1344	5e-179	PREDICTED: junctional adhesion molecule B isoform X1 [Ovis aries]	gi|556751735|ref|XM_005971204.1|	1335	0	PREDICTED: Pantholops hodgsonii junctional adhesion molecule 2 (JAM2), mRNA	P57087	437	3e-147	Junctional adhesion molecule B	.	.	.	.	pfam07679	I-set	Immunoglobulin I-set domain.	GO:0030198|extracellular matrix organization;GO:0050900|leukocyte migration;GO:0007162|negative regulation of cell adhesion;GO:0016337|single organismal cell-cell adhesion;	GO:0005923|bicellular tight junction;GO:0005887|integral component of plasma membrane;GO:0005886|plasma membrane;	.	K06735	JAM2; junctional adhesion molecule 2
oar_circ_0000442	5	9	11	8.9062	8	10	12	-0.526257	0.511771	0.999963	down	no	NC_019458.2:128764035..128773103:-	gene1739	gi|803006776|ref|XP_011963222.1|	1344	5e-179	PREDICTED: junctional adhesion molecule B isoform X1 [Ovis aries]	gi|556751735|ref|XM_005971204.1|	1335	0	PREDICTED: Pantholops hodgsonii junctional adhesion molecule 2 (JAM2), mRNA	P57087	437	3e-147	Junctional adhesion molecule B	.	.	.	.	pfam07679	I-set	Immunoglobulin I-set domain.	GO:0030198|extracellular matrix organization;GO:0050900|leukocyte migration;GO:0007162|negative regulation of cell adhesion;GO:0016337|single organismal cell-cell adhesion;	GO:0005923|bicellular tight junction;GO:0005887|integral component of plasma membrane;GO:0005886|plasma membrane;	.	K06735	JAM2; junctional adhesion molecule 2
oar_circ_0000444	0	2	0	0.259949	0	0	0	1.18697	0.42538	NA	up	no	NC_019458.2:133480850..133485614:-	gene1749	gi|426217241|ref|XP_004002862.1|	3873	0	PREDICTED: neural cell adhesion molecule 2 isoform X1 [Ovis aries]	gi|594089657|ref|XM_006068183.1|	6949	0	PREDICTED: Bubalus bubalis neural cell adhesion molecule 2 (NCAM2), mRNA	O15394	1229	0	Neural cell adhesion molecule 2	.	.	.	.	pfam07679	I-set	Immunoglobulin I-set domain.	GO:0007413|axonal fasciculation;GO:0007158|neuron cell-cell adhesion;GO:0007608|sensory perception of smell;	GO:0030424|axon;GO:0016021|integral component of membrane;GO:0005886|plasma membrane;	.	K06491	NCAM; neural cell adhesion molecule
oar_circ_0000446	0	0	3	0.367144	0	0	0	1.3119	0.385146	NA	up	no	NC_019458.2:133517749..133538826:-	gene1749	gi|426217241|ref|XP_004002862.1|	3873	0	PREDICTED: neural cell adhesion molecule 2 isoform X1 [Ovis aries]	gi|594089657|ref|XM_006068183.1|	6949	0	PREDICTED: Bubalus bubalis neural cell adhesion molecule 2 (NCAM2), mRNA	O15394	1229	0	Neural cell adhesion molecule 2	.	.	.	.	pfam07679	I-set	Immunoglobulin I-set domain.	GO:0007413|axonal fasciculation;GO:0007158|neuron cell-cell adhesion;GO:0007608|sensory perception of smell;	GO:0030424|axon;GO:0016021|integral component of membrane;GO:0005886|plasma membrane;	.	K06491	NCAM; neural cell adhesion molecule
oar_circ_0000447	0	0	2	2.03654	0	6	4	-1.8632	0.207896	0.999963	down	no	NC_019458.2:133517749..133561266:-	gene1749	gi|426217241|ref|XP_004002862.1|	3873	0	PREDICTED: neural cell adhesion molecule 2 isoform X1 [Ovis aries]	gi|594089657|ref|XM_006068183.1|	6949	0	PREDICTED: Bubalus bubalis neural cell adhesion molecule 2 (NCAM2), mRNA	O15394	1229	0	Neural cell adhesion molecule 2	.	.	.	.	pfam07679	I-set	Immunoglobulin I-set domain.	GO:0007413|axonal fasciculation;GO:0007158|neuron cell-cell adhesion;GO:0007608|sensory perception of smell;	GO:0030424|axon;GO:0016021|integral component of membrane;GO:0005886|plasma membrane;	.	K06491	NCAM; neural cell adhesion molecule
oar_circ_0000448	2	0	0	0.426371	0	0	0	1.32953	0.379624	NA	up	no	NC_019458.2:133517749..133582380:-	gene1749	gi|426217241|ref|XP_004002862.1|	3873	0	PREDICTED: neural cell adhesion molecule 2 isoform X1 [Ovis aries]	gi|594089657|ref|XM_006068183.1|	6949	0	PREDICTED: Bubalus bubalis neural cell adhesion molecule 2 (NCAM2), mRNA	O15394	1229	0	Neural cell adhesion molecule 2	.	.	.	.	pfam07679	I-set	Immunoglobulin I-set domain.	GO:0007413|axonal fasciculation;GO:0007158|neuron cell-cell adhesion;GO:0007608|sensory perception of smell;	GO:0030424|axon;GO:0016021|integral component of membrane;GO:0005886|plasma membrane;	.	K06491	NCAM; neural cell adhesion molecule
oar_circ_0000449	0	0	2	1.30867	2	2	2	-1.3036	0.390532	NA	down	no	NC_019458.2:133533585..133721966:-	gene1749	gi|426217241|ref|XP_004002862.1|	3873	0	PREDICTED: neural cell adhesion molecule 2 isoform X1 [Ovis aries]	gi|594089657|ref|XM_006068183.1|	6949	0	PREDICTED: Bubalus bubalis neural cell adhesion molecule 2 (NCAM2), mRNA	O15394	1229	0	Neural cell adhesion molecule 2	.	.	.	.	pfam07679	I-set	Immunoglobulin I-set domain.	GO:0007413|axonal fasciculation;GO:0007158|neuron cell-cell adhesion;GO:0007608|sensory perception of smell;	GO:0030424|axon;GO:0016021|integral component of membrane;GO:0005886|plasma membrane;	.	K06491	NCAM; neural cell adhesion molecule
oar_circ_0000450	0	0	0	0.891903	0	2	3	-2.25023	0.157453	NA	down	no	NC_019458.2:133538707..133721966:-	gene1749	gi|426217241|ref|XP_004002862.1|	3873	0	PREDICTED: neural cell adhesion molecule 2 isoform X1 [Ovis aries]	gi|594089657|ref|XM_006068183.1|	6949	0	PREDICTED: Bubalus bubalis neural cell adhesion molecule 2 (NCAM2), mRNA	O15394	1229	0	Neural cell adhesion molecule 2	.	.	.	.	pfam07679	I-set	Immunoglobulin I-set domain.	GO:0007413|axonal fasciculation;GO:0007158|neuron cell-cell adhesion;GO:0007608|sensory perception of smell;	GO:0030424|axon;GO:0016021|integral component of membrane;GO:0005886|plasma membrane;	.	K06491	NCAM; neural cell adhesion molecule
oar_circ_0000451	2	0	0	0.426371	0	0	0	1.32953	0.379624	NA	up	no	NC_019458.2:133561093..133582380:-	gene1749	gi|426217241|ref|XP_004002862.1|	3873	0	PREDICTED: neural cell adhesion molecule 2 isoform X1 [Ovis aries]	gi|594089657|ref|XM_006068183.1|	6949	0	PREDICTED: Bubalus bubalis neural cell adhesion molecule 2 (NCAM2), mRNA	O15394	1229	0	Neural cell adhesion molecule 2	.	.	.	.	pfam07679	I-set	Immunoglobulin I-set domain.	GO:0007413|axonal fasciculation;GO:0007158|neuron cell-cell adhesion;GO:0007608|sensory perception of smell;	GO:0030424|axon;GO:0016021|integral component of membrane;GO:0005886|plasma membrane;	.	K06491	NCAM; neural cell adhesion molecule
oar_circ_0000453	3	4	2	5.82228	9	5	11	-1.50535	0.126576	0.999963	down	no	NC_019458.2:133561093..133721966:-	gene1749	gi|426217241|ref|XP_004002862.1|	3873	0	PREDICTED: neural cell adhesion molecule 2 isoform X1 [Ovis aries]	gi|594089657|ref|XM_006068183.1|	6949	0	PREDICTED: Bubalus bubalis neural cell adhesion molecule 2 (NCAM2), mRNA	O15394	1229	0	Neural cell adhesion molecule 2	.	.	.	.	pfam07679	I-set	Immunoglobulin I-set domain.	GO:0007413|axonal fasciculation;GO:0007158|neuron cell-cell adhesion;GO:0007608|sensory perception of smell;	GO:0030424|axon;GO:0016021|integral component of membrane;GO:0005886|plasma membrane;	.	K06491	NCAM; neural cell adhesion molecule
oar_circ_0000454	0	0	2	0.244763	0	0	0	1.16974	0.431077	NA	up	no	NC_019458.2:133577611..133624434:-	gene1749	gi|426217241|ref|XP_004002862.1|	3873	0	PREDICTED: neural cell adhesion molecule 2 isoform X1 [Ovis aries]	gi|594089657|ref|XM_006068183.1|	6949	0	PREDICTED: Bubalus bubalis neural cell adhesion molecule 2 (NCAM2), mRNA	O15394	1229	0	Neural cell adhesion molecule 2	.	.	.	.	pfam07679	I-set	Immunoglobulin I-set domain.	GO:0007413|axonal fasciculation;GO:0007158|neuron cell-cell adhesion;GO:0007608|sensory perception of smell;	GO:0030424|axon;GO:0016021|integral component of membrane;GO:0005886|plasma membrane;	.	K06491	NCAM; neural cell adhesion molecule
oar_circ_0000455	4	6	8	5.79698	7	5	6	-0.257688	0.784106	0.999963	down	no	NC_019458.2:133577611..133721966:-	gene1749	gi|426217241|ref|XP_004002862.1|	3873	0	PREDICTED: neural cell adhesion molecule 2 isoform X1 [Ovis aries]	gi|594089657|ref|XM_006068183.1|	6949	0	PREDICTED: Bubalus bubalis neural cell adhesion molecule 2 (NCAM2), mRNA	O15394	1229	0	Neural cell adhesion molecule 2	.	.	.	.	pfam07679	I-set	Immunoglobulin I-set domain.	GO:0007413|axonal fasciculation;GO:0007158|neuron cell-cell adhesion;GO:0007608|sensory perception of smell;	GO:0030424|axon;GO:0016021|integral component of membrane;GO:0005886|plasma membrane;	.	K06491	NCAM; neural cell adhesion molecule
oar_circ_0000456	2	12	4	6.19687	8	7	6	-0.508122	0.595009	0.999963	down	no	NC_019458.2:133624284..133721966:-	gene1749	gi|426217241|ref|XP_004002862.1|	3873	0	PREDICTED: neural cell adhesion molecule 2 isoform X1 [Ovis aries]	gi|594089657|ref|XM_006068183.1|	6949	0	PREDICTED: Bubalus bubalis neural cell adhesion molecule 2 (NCAM2), mRNA	O15394	1229	0	Neural cell adhesion molecule 2	.	.	.	.	pfam07679	I-set	Immunoglobulin I-set domain.	GO:0007413|axonal fasciculation;GO:0007158|neuron cell-cell adhesion;GO:0007608|sensory perception of smell;	GO:0030424|axon;GO:0016021|integral component of membrane;GO:0005886|plasma membrane;	.	K06491	NCAM; neural cell adhesion molecule
oar_circ_0000457	0	0	3	0.367144	0	0	0	1.3119	0.385146	NA	up	no	NC_019458.2:133651120..133705277:-	gene1749	gi|426217241|ref|XP_004002862.1|	3873	0	PREDICTED: neural cell adhesion molecule 2 isoform X1 [Ovis aries]	gi|594089657|ref|XM_006068183.1|	6949	0	PREDICTED: Bubalus bubalis neural cell adhesion molecule 2 (NCAM2), mRNA	O15394	1229	0	Neural cell adhesion molecule 2	.	.	.	.	pfam07679	I-set	Immunoglobulin I-set domain.	GO:0007413|axonal fasciculation;GO:0007158|neuron cell-cell adhesion;GO:0007608|sensory perception of smell;	GO:0030424|axon;GO:0016021|integral component of membrane;GO:0005886|plasma membrane;	.	K06491	NCAM; neural cell adhesion molecule
oar_circ_0000458	2	9	4	3.49279	3	0	5	0.477176	0.693617	0.999963	up	no	NC_019458.2:133651120..133721966:-	gene1749	gi|426217241|ref|XP_004002862.1|	3873	0	PREDICTED: neural cell adhesion molecule 2 isoform X1 [Ovis aries]	gi|594089657|ref|XM_006068183.1|	6949	0	PREDICTED: Bubalus bubalis neural cell adhesion molecule 2 (NCAM2), mRNA	O15394	1229	0	Neural cell adhesion molecule 2	.	.	.	.	pfam07679	I-set	Immunoglobulin I-set domain.	GO:0007413|axonal fasciculation;GO:0007158|neuron cell-cell adhesion;GO:0007608|sensory perception of smell;	GO:0030424|axon;GO:0016021|integral component of membrane;GO:0005886|plasma membrane;	.	K06491	NCAM; neural cell adhesion molecule
oar_circ_0000459	0	0	2	0.787076	0	3	0	-0.508707	0.74899	NA	down	no	NC_019458.2:133659746..133721966:-	gene1749	gi|426217241|ref|XP_004002862.1|	3873	0	PREDICTED: neural cell adhesion molecule 2 isoform X1 [Ovis aries]	gi|594089657|ref|XM_006068183.1|	6949	0	PREDICTED: Bubalus bubalis neural cell adhesion molecule 2 (NCAM2), mRNA	O15394	1229	0	Neural cell adhesion molecule 2	.	.	.	.	pfam07679	I-set	Immunoglobulin I-set domain.	GO:0007413|axonal fasciculation;GO:0007158|neuron cell-cell adhesion;GO:0007608|sensory perception of smell;	GO:0030424|axon;GO:0016021|integral component of membrane;GO:0005886|plasma membrane;	.	K06491	NCAM; neural cell adhesion molecule
oar_circ_0000460	64	80	115	74.2693	66	62	76	0.0731616	0.839148	0.999963	up	no	NC_019458.2:133705140..133721966:-	gene1749	gi|426217241|ref|XP_004002862.1|	3873	0	PREDICTED: neural cell adhesion molecule 2 isoform X1 [Ovis aries]	gi|594089657|ref|XM_006068183.1|	6949	0	PREDICTED: Bubalus bubalis neural cell adhesion molecule 2 (NCAM2), mRNA	O15394	1229	0	Neural cell adhesion molecule 2	.	.	.	.	pfam07679	I-set	Immunoglobulin I-set domain.	GO:0007413|axonal fasciculation;GO:0007158|neuron cell-cell adhesion;GO:0007608|sensory perception of smell;	GO:0030424|axon;GO:0016021|integral component of membrane;GO:0005886|plasma membrane;	.	K06491	NCAM; neural cell adhesion molecule
oar_circ_0000461	0	0	0	0.361542	0	2	0	-1.3392	0.374749	NA	down	no	NC_019458.2:133705140..133808023:-	Null	.	.	.	.	.	.	.	.	.	.	.	.	.	.	.	.	.	.	.	.	.	.	.	.
oar_circ_0000461	0	0	0	0.361542	0	2	0	-1.3392	0.374749	NA	down	no	NC_019458.2:133705140..133808023:-	gene1749	gi|426217241|ref|XP_004002862.1|	3873	0	PREDICTED: neural cell adhesion molecule 2 isoform X1 [Ovis aries]	gi|594089657|ref|XM_006068183.1|	6949	0	PREDICTED: Bubalus bubalis neural cell adhesion molecule 2 (NCAM2), mRNA	O15394	1229	0	Neural cell adhesion molecule 2	.	.	.	.	pfam07679	I-set	Immunoglobulin I-set domain.	GO:0007413|axonal fasciculation;GO:0007158|neuron cell-cell adhesion;GO:0007608|sensory perception of smell;	GO:0030424|axon;GO:0016021|integral component of membrane;GO:0005886|plasma membrane;	.	K06491	NCAM; neural cell adhesion molecule
oar_circ_0000462	0	7	2	1.50337	2	0	0	1.09893	0.473399	NA	up	no	NC_019458.2:133715397..133721966:-	Null	.	.	.	.	.	.	.	.	.	.	.	.	.	.	.	.	.	.	.	.	.	.	.	.
oar_circ_0000462	0	7	2	1.50337	2	0	0	1.09893	0.473399	NA	up	no	NC_019458.2:133715397..133721966:-	gene1749	gi|426217241|ref|XP_004002862.1|	3873	0	PREDICTED: neural cell adhesion molecule 2 isoform X1 [Ovis aries]	gi|594089657|ref|XM_006068183.1|	6949	0	PREDICTED: Bubalus bubalis neural cell adhesion molecule 2 (NCAM2), mRNA	O15394	1229	0	Neural cell adhesion molecule 2	.	.	.	.	pfam07679	I-set	Immunoglobulin I-set domain.	GO:0007413|axonal fasciculation;GO:0007158|neuron cell-cell adhesion;GO:0007608|sensory perception of smell;	GO:0030424|axon;GO:0016021|integral component of membrane;GO:0005886|plasma membrane;	.	K06491	NCAM; neural cell adhesion molecule
oar_circ_0000463	23	39	60	37.4289	45	17	52	-0.205526	0.689024	0.999963	down	no	NC_019458.2:133715409..133721966:-	gene1749	gi|426217241|ref|XP_004002862.1|	3873	0	PREDICTED: neural cell adhesion molecule 2 isoform X1 [Ovis aries]	gi|594089657|ref|XM_006068183.1|	6949	0	PREDICTED: Bubalus bubalis neural cell adhesion molecule 2 (NCAM2), mRNA	O15394	1229	0	Neural cell adhesion molecule 2	.	.	.	.	pfam07679	I-set	Immunoglobulin I-set domain.	GO:0007413|axonal fasciculation;GO:0007158|neuron cell-cell adhesion;GO:0007608|sensory perception of smell;	GO:0030424|axon;GO:0016021|integral component of membrane;GO:0005886|plasma membrane;	.	K06491	NCAM; neural cell adhesion molecule
oar_circ_0000464	0	0	2	0.244763	0	0	0	1.16974	0.431077	NA	up	no	NC_019458.2:133902707..133904847:-	Null	.	.	.	.	.	.	.	.	.	.	.	.	.	.	.	.	.	.	.	.	.	.	.	.
oar_circ_0000465	0	3	0	0.389924	0	0	0	1.32957	0.379611	NA	up	no	NC_019458.2:133929863..133939604:-	Null	.	.	.	.	.	.	.	.	.	.	.	.	.	.	.	.	.	.	.	.	.	.	.	.
oar_circ_0000466	0	0	0	0.361542	0	2	0	-1.3392	0.374749	NA	down	no	NC_019458.2:13395414..13400897:-	gene198	gi|426215220|ref|XP_004001872.1|	1309	6e-176	PREDICTED: rhomboid-related protein 2 isoform X2 [Ovis aries]	gi|548461492|ref|XM_005678671.1|	1473	0	PREDICTED: Capra hircus rhomboid, veinlet-like 2 (Drosophila) (RHBDL2), transcript variant X2, mRNA	A2AGA4	441	4e-151	Rhomboid-related protein 2	BS_yqgP_1	55.1	2e-07	COG0705	pfam01694	Rhomboid	Rhomboid family. This family contains integral membrane proteins that are related to Drosophila rhomboid protein. Members of this family are found in bacteria and eukaryotes. Rhomboid promotes the cleavage of the membrane-anchored TGF-alpha-like growth factor Spitz, allowing it to activate the Drosophila EGF receptor. Analysis has shown that Rhomboid-1 is an intramembrane serine protease.4] (EC:3…	GO:0016485|protein processing;	GO:0016021|integral component of membrane;GO:0005743|mitochondrial inner membrane;GO:0005886|plasma membrane;	GO:0004252|serine-type endopeptidase activity;	K02857	RHBDL1_2_3; rhomboid-related protein 1/2/3 [EC:3.4.21.105]
oar_circ_0000467	0	4	2	1.30697	0	3	0	0.328828	0.832064	NA	up	no	NC_019458.2:13668848..13686552:+	gene204	gi|803223122|ref|XP_011971851.1|	37139	0	PREDICTED: microtubule-actin cross-linking factor 1 isoform X2 [Ovis aries musimon]	gi|548461480|ref|XM_005678665.1|	21166	0	PREDICTED: Capra hircus microtubule-actin crosslinking factor 1 (MACF1), transcript variant X1, mRNA	Q9UPN3	9213	0	Microtubule-actin cross-linking factor 1, isoforms 1/2/3/5	ECU09g0290	190	1e-48	COG5069	pfam02187	GAS2	Growth-Arrest-Specific Protein 2 Domain.	GO:0043001|Golgi to plasma membrane protein transport;GO:0045773|positive regulation of axon extension;GO:0030177|positive regulation of Wnt signaling pathway;GO:0010632|regulation of epithelial cell migration;GO:0051893|regulation of focal adhesion assembly;GO:0032886|regulation of microtubule-based process;GO:0016055|Wnt signaling pathway;GO:0042060|wound healing;	GO:0005913|cell-cell adherens junction;GO:0005737|cytoplasm;GO:0005856|cytoskeleton;GO:0005794|Golgi apparatus;GO:0005874|microtubule;GO:0005886|plasma membrane;GO:0032587|ruffle membrane;	GO:0003779|actin binding;GO:0051015|actin filament binding;GO:0016887|ATPase activity;GO:0098641|cadherin binding involved in cell-cell adhesion;GO:0005509|calcium ion binding;GO:0044822|poly(A) RNA binding;	.	.
oar_circ_0000468	0	0	0	0.903856	0	5	0	-2.03628	0.19849	NA	down	no	NC_019458.2:13731512..13736175:+	gene204	gi|803223122|ref|XP_011971851.1|	37139	0	PREDICTED: microtubule-actin cross-linking factor 1 isoform X2 [Ovis aries musimon]	gi|548461480|ref|XM_005678665.1|	21166	0	PREDICTED: Capra hircus microtubule-actin crosslinking factor 1 (MACF1), transcript variant X1, mRNA	Q9UPN3	9213	0	Microtubule-actin cross-linking factor 1, isoforms 1/2/3/5	ECU09g0290	190	1e-48	COG5069	pfam02187	GAS2	Growth-Arrest-Specific Protein 2 Domain.	GO:0043001|Golgi to plasma membrane protein transport;GO:0045773|positive regulation of axon extension;GO:0030177|positive regulation of Wnt signaling pathway;GO:0010632|regulation of epithelial cell migration;GO:0051893|regulation of focal adhesion assembly;GO:0032886|regulation of microtubule-based process;GO:0016055|Wnt signaling pathway;GO:0042060|wound healing;	GO:0005913|cell-cell adherens junction;GO:0005737|cytoplasm;GO:0005856|cytoskeleton;GO:0005794|Golgi apparatus;GO:0005874|microtubule;GO:0005886|plasma membrane;GO:0032587|ruffle membrane;	GO:0003779|actin binding;GO:0051015|actin filament binding;GO:0016887|ATPase activity;GO:0098641|cadherin binding involved in cell-cell adhesion;GO:0005509|calcium ion binding;GO:0044822|poly(A) RNA binding;	.	.
oar_circ_0000469	0	4	0	0.519898	0	0	0	1.4263	0.350041	NA	up	no	NC_019458.2:13731512..13752947:+	gene204	gi|803223122|ref|XP_011971851.1|	37139	0	PREDICTED: microtubule-actin cross-linking factor 1 isoform X2 [Ovis aries musimon]	gi|548461480|ref|XM_005678665.1|	21166	0	PREDICTED: Capra hircus microtubule-actin crosslinking factor 1 (MACF1), transcript variant X1, mRNA	Q9UPN3	9213	0	Microtubule-actin cross-linking factor 1, isoforms 1/2/3/5	ECU09g0290	190	1e-48	COG5069	pfam02187	GAS2	Growth-Arrest-Specific Protein 2 Domain.	GO:0043001|Golgi to plasma membrane protein transport;GO:0045773|positive regulation of axon extension;GO:0030177|positive regulation of Wnt signaling pathway;GO:0010632|regulation of epithelial cell migration;GO:0051893|regulation of focal adhesion assembly;GO:0032886|regulation of microtubule-based process;GO:0016055|Wnt signaling pathway;GO:0042060|wound healing;	GO:0005913|cell-cell adherens junction;GO:0005737|cytoplasm;GO:0005856|cytoskeleton;GO:0005794|Golgi apparatus;GO:0005874|microtubule;GO:0005886|plasma membrane;GO:0032587|ruffle membrane;	GO:0003779|actin binding;GO:0051015|actin filament binding;GO:0016887|ATPase activity;GO:0098641|cadherin binding involved in cell-cell adhesion;GO:0005509|calcium ion binding;GO:0044822|poly(A) RNA binding;	.	.
oar_circ_0000472	2	0	0	0.426371	0	0	0	1.32953	0.379624	NA	up	no	NC_019458.2:13768741..13839174:+	gene204	gi|803223122|ref|XP_011971851.1|	37139	0	PREDICTED: microtubule-actin cross-linking factor 1 isoform X2 [Ovis aries musimon]	gi|548461480|ref|XM_005678665.1|	21166	0	PREDICTED: Capra hircus microtubule-actin crosslinking factor 1 (MACF1), transcript variant X1, mRNA	Q9UPN3	9213	0	Microtubule-actin cross-linking factor 1, isoforms 1/2/3/5	ECU09g0290	190	1e-48	COG5069	pfam02187	GAS2	Growth-Arrest-Specific Protein 2 Domain.	GO:0043001|Golgi to plasma membrane protein transport;GO:0045773|positive regulation of axon extension;GO:0030177|positive regulation of Wnt signaling pathway;GO:0010632|regulation of epithelial cell migration;GO:0051893|regulation of focal adhesion assembly;GO:0032886|regulation of microtubule-based process;GO:0016055|Wnt signaling pathway;GO:0042060|wound healing;	GO:0005913|cell-cell adherens junction;GO:0005737|cytoplasm;GO:0005856|cytoskeleton;GO:0005794|Golgi apparatus;GO:0005874|microtubule;GO:0005886|plasma membrane;GO:0032587|ruffle membrane;	GO:0003779|actin binding;GO:0051015|actin filament binding;GO:0016887|ATPase activity;GO:0098641|cadherin binding involved in cell-cell adhesion;GO:0005509|calcium ion binding;GO:0044822|poly(A) RNA binding;	.	.
oar_circ_0000473	0	0	0	0.361542	0	2	0	-1.3392	0.374749	NA	down	no	NC_019458.2:13770092..13782910:+	gene204	gi|803223122|ref|XP_011971851.1|	37139	0	PREDICTED: microtubule-actin cross-linking factor 1 isoform X2 [Ovis aries musimon]	gi|548461480|ref|XM_005678665.1|	21166	0	PREDICTED: Capra hircus microtubule-actin crosslinking factor 1 (MACF1), transcript variant X1, mRNA	Q9UPN3	9213	0	Microtubule-actin cross-linking factor 1, isoforms 1/2/3/5	ECU09g0290	190	1e-48	COG5069	pfam02187	GAS2	Growth-Arrest-Specific Protein 2 Domain.	GO:0043001|Golgi to plasma membrane protein transport;GO:0045773|positive regulation of axon extension;GO:0030177|positive regulation of Wnt signaling pathway;GO:0010632|regulation of epithelial cell migration;GO:0051893|regulation of focal adhesion assembly;GO:0032886|regulation of microtubule-based process;GO:0016055|Wnt signaling pathway;GO:0042060|wound healing;	GO:0005913|cell-cell adherens junction;GO:0005737|cytoplasm;GO:0005856|cytoskeleton;GO:0005794|Golgi apparatus;GO:0005874|microtubule;GO:0005886|plasma membrane;GO:0032587|ruffle membrane;	GO:0003779|actin binding;GO:0051015|actin filament binding;GO:0016887|ATPase activity;GO:0098641|cadherin binding involved in cell-cell adhesion;GO:0005509|calcium ion binding;GO:0044822|poly(A) RNA binding;	.	.
oar_circ_0000474	0	0	0	0.903856	0	5	0	-2.03628	0.19849	NA	down	no	NC_019458.2:137792072..137793164:+	Null	.	.	.	.	.	.	.	.	.	.	.	.	.	.	.	.	.	.	.	.	.	.	.	.
oar_circ_0000475	0	4	0	0.519898	0	0	0	1.4263	0.350041	NA	up	no	NC_019458.2:137851896..137852950:+	Null	.	.	.	.	.	.	.	.	.	.	.	.	.	.	.	.	.	.	.	.	.	.	.	.
oar_circ_0000476	4	4	0	1.37264	0	0	0	2.72115	0.0860134	NA	up	no	NC_019458.2:137851896..137931305:+	Null	.	.	.	.	.	.	.	.	.	.	.	.	.	.	.	.	.	.	.	.	.	.	.	.
oar_circ_0000478	4	0	0	0.852741	0	0	0	1.86391	0.237023	NA	up	no	NC_019458.2:13790921..13796420:+	gene204	gi|803223122|ref|XP_011971851.1|	37139	0	PREDICTED: microtubule-actin cross-linking factor 1 isoform X2 [Ovis aries musimon]	gi|548461480|ref|XM_005678665.1|	21166	0	PREDICTED: Capra hircus microtubule-actin crosslinking factor 1 (MACF1), transcript variant X1, mRNA	Q9UPN3	9213	0	Microtubule-actin cross-linking factor 1, isoforms 1/2/3/5	ECU09g0290	190	1e-48	COG5069	pfam02187	GAS2	Growth-Arrest-Specific Protein 2 Domain.	GO:0043001|Golgi to plasma membrane protein transport;GO:0045773|positive regulation of axon extension;GO:0030177|positive regulation of Wnt signaling pathway;GO:0010632|regulation of epithelial cell migration;GO:0051893|regulation of focal adhesion assembly;GO:0032886|regulation of microtubule-based process;GO:0016055|Wnt signaling pathway;GO:0042060|wound healing;	GO:0005913|cell-cell adherens junction;GO:0005737|cytoplasm;GO:0005856|cytoskeleton;GO:0005794|Golgi apparatus;GO:0005874|microtubule;GO:0005886|plasma membrane;GO:0032587|ruffle membrane;	GO:0003779|actin binding;GO:0051015|actin filament binding;GO:0016887|ATPase activity;GO:0098641|cadherin binding involved in cell-cell adhesion;GO:0005509|calcium ion binding;GO:0044822|poly(A) RNA binding;	.	.
oar_circ_0000479	0	3	2	0.634686	0	0	0	1.76392	0.261515	NA	up	no	NC_019458.2:13793761..13826887:+	gene204	gi|803223122|ref|XP_011971851.1|	37139	0	PREDICTED: microtubule-actin cross-linking factor 1 isoform X2 [Ovis aries musimon]	gi|548461480|ref|XM_005678665.1|	21166	0	PREDICTED: Capra hircus microtubule-actin crosslinking factor 1 (MACF1), transcript variant X1, mRNA	Q9UPN3	9213	0	Microtubule-actin cross-linking factor 1, isoforms 1/2/3/5	ECU09g0290	190	1e-48	COG5069	pfam02187	GAS2	Growth-Arrest-Specific Protein 2 Domain.	GO:0043001|Golgi to plasma membrane protein transport;GO:0045773|positive regulation of axon extension;GO:0030177|positive regulation of Wnt signaling pathway;GO:0010632|regulation of epithelial cell migration;GO:0051893|regulation of focal adhesion assembly;GO:0032886|regulation of microtubule-based process;GO:0016055|Wnt signaling pathway;GO:0042060|wound healing;	GO:0005913|cell-cell adherens junction;GO:0005737|cytoplasm;GO:0005856|cytoskeleton;GO:0005794|Golgi apparatus;GO:0005874|microtubule;GO:0005886|plasma membrane;GO:0032587|ruffle membrane;	GO:0003779|actin binding;GO:0051015|actin filament binding;GO:0016887|ATPase activity;GO:0098641|cadherin binding involved in cell-cell adhesion;GO:0005509|calcium ion binding;GO:0044822|poly(A) RNA binding;	.	.
oar_circ_0000480	3	0	0	0.639556	0	0	0	1.53345	0.320032	NA	up	no	NC_019458.2:13825591..13826887:+	gene204	gi|803223122|ref|XP_011971851.1|	37139	0	PREDICTED: microtubule-actin cross-linking factor 1 isoform X2 [Ovis aries musimon]	gi|548461480|ref|XM_005678665.1|	21166	0	PREDICTED: Capra hircus microtubule-actin crosslinking factor 1 (MACF1), transcript variant X1, mRNA	Q9UPN3	9213	0	Microtubule-actin cross-linking factor 1, isoforms 1/2/3/5	ECU09g0290	190	1e-48	COG5069	pfam02187	GAS2	Growth-Arrest-Specific Protein 2 Domain.	GO:0043001|Golgi to plasma membrane protein transport;GO:0045773|positive regulation of axon extension;GO:0030177|positive regulation of Wnt signaling pathway;GO:0010632|regulation of epithelial cell migration;GO:0051893|regulation of focal adhesion assembly;GO:0032886|regulation of microtubule-based process;GO:0016055|Wnt signaling pathway;GO:0042060|wound healing;	GO:0005913|cell-cell adherens junction;GO:0005737|cytoplasm;GO:0005856|cytoskeleton;GO:0005794|Golgi apparatus;GO:0005874|microtubule;GO:0005886|plasma membrane;GO:0032587|ruffle membrane;	GO:0003779|actin binding;GO:0051015|actin filament binding;GO:0016887|ATPase activity;GO:0098641|cadherin binding involved in cell-cell adhesion;GO:0005509|calcium ion binding;GO:0044822|poly(A) RNA binding;	.	.
oar_circ_0000481	0	0	0	0.542314	0	3	0	-1.47697	0.333866	NA	down	no	NC_019458.2:13825591..13830651:+	gene204	gi|803223122|ref|XP_011971851.1|	37139	0	PREDICTED: microtubule-actin cross-linking factor 1 isoform X2 [Ovis aries musimon]	gi|548461480|ref|XM_005678665.1|	21166	0	PREDICTED: Capra hircus microtubule-actin crosslinking factor 1 (MACF1), transcript variant X1, mRNA	Q9UPN3	9213	0	Microtubule-actin cross-linking factor 1, isoforms 1/2/3/5	ECU09g0290	190	1e-48	COG5069	pfam02187	GAS2	Growth-Arrest-Specific Protein 2 Domain.	GO:0043001|Golgi to plasma membrane protein transport;GO:0045773|positive regulation of axon extension;GO:0030177|positive regulation of Wnt signaling pathway;GO:0010632|regulation of epithelial cell migration;GO:0051893|regulation of focal adhesion assembly;GO:0032886|regulation of microtubule-based process;GO:0016055|Wnt signaling pathway;GO:0042060|wound healing;	GO:0005913|cell-cell adherens junction;GO:0005737|cytoplasm;GO:0005856|cytoskeleton;GO:0005794|Golgi apparatus;GO:0005874|microtubule;GO:0005886|plasma membrane;GO:0032587|ruffle membrane;	GO:0003779|actin binding;GO:0051015|actin filament binding;GO:0016887|ATPase activity;GO:0098641|cadherin binding involved in cell-cell adhesion;GO:0005509|calcium ion binding;GO:0044822|poly(A) RNA binding;	.	.
oar_circ_0000483	3	5	0	1.28943	0	0	0	2.64349	0.0959034	NA	up	no	NC_019458.2:138582378..138584889:-	Null	.	.	.	.	.	.	.	.	.	.	.	.	.	.	.	.	.	.	.	.	.	.	.	.
oar_circ_0000484	0	5	0	0.649873	0	0	0	1.58262	0.306597	NA	up	no	NC_019458.2:138582378..138584892:-	Null	.	.	.	.	.	.	.	.	.	.	.	.	.	.	.	.	.	.	.	.	.	.	.	.
oar_circ_0000485	3	3	7	2.76291	3	0	2	0.878754	0.491152	0.999963	up	no	NC_019458.2:13860230..13864806:+	gene204	gi|803223122|ref|XP_011971851.1|	37139	0	PREDICTED: microtubule-actin cross-linking factor 1 isoform X2 [Ovis aries musimon]	gi|548461480|ref|XM_005678665.1|	21166	0	PREDICTED: Capra hircus microtubule-actin crosslinking factor 1 (MACF1), transcript variant X1, mRNA	Q9UPN3	9213	0	Microtubule-actin cross-linking factor 1, isoforms 1/2/3/5	ECU09g0290	190	1e-48	COG5069	pfam02187	GAS2	Growth-Arrest-Specific Protein 2 Domain.	GO:0043001|Golgi to plasma membrane protein transport;GO:0045773|positive regulation of axon extension;GO:0030177|positive regulation of Wnt signaling pathway;GO:0010632|regulation of epithelial cell migration;GO:0051893|regulation of focal adhesion assembly;GO:0032886|regulation of microtubule-based process;GO:0016055|Wnt signaling pathway;GO:0042060|wound healing;	GO:0005913|cell-cell adherens junction;GO:0005737|cytoplasm;GO:0005856|cytoskeleton;GO:0005794|Golgi apparatus;GO:0005874|microtubule;GO:0005886|plasma membrane;GO:0032587|ruffle membrane;	GO:0003779|actin binding;GO:0051015|actin filament binding;GO:0016887|ATPase activity;GO:0098641|cadherin binding involved in cell-cell adhesion;GO:0005509|calcium ion binding;GO:0044822|poly(A) RNA binding;	.	.
oar_circ_0000486	3	0	3	1.36027	0	0	2	0.903227	0.559652	NA	up	no	NC_019458.2:13860230..13868748:+	gene204	gi|803223122|ref|XP_011971851.1|	37139	0	PREDICTED: microtubule-actin cross-linking factor 1 isoform X2 [Ovis aries musimon]	gi|548461480|ref|XM_005678665.1|	21166	0	PREDICTED: Capra hircus microtubule-actin crosslinking factor 1 (MACF1), transcript variant X1, mRNA	Q9UPN3	9213	0	Microtubule-actin cross-linking factor 1, isoforms 1/2/3/5	ECU09g0290	190	1e-48	COG5069	pfam02187	GAS2	Growth-Arrest-Specific Protein 2 Domain.	GO:0043001|Golgi to plasma membrane protein transport;GO:0045773|positive regulation of axon extension;GO:0030177|positive regulation of Wnt signaling pathway;GO:0010632|regulation of epithelial cell migration;GO:0051893|regulation of focal adhesion assembly;GO:0032886|regulation of microtubule-based process;GO:0016055|Wnt signaling pathway;GO:0042060|wound healing;	GO:0005913|cell-cell adherens junction;GO:0005737|cytoplasm;GO:0005856|cytoskeleton;GO:0005794|Golgi apparatus;GO:0005874|microtubule;GO:0005886|plasma membrane;GO:0032587|ruffle membrane;	GO:0003779|actin binding;GO:0051015|actin filament binding;GO:0016887|ATPase activity;GO:0098641|cadherin binding involved in cell-cell adhesion;GO:0005509|calcium ion binding;GO:0044822|poly(A) RNA binding;	.	.
[truncated: 29,506 more rows]

## Sheet: BB_F_H_WW_F_H
Gene	BB_F_H1_count	BB_F_H2_count	BB_F_H3_count	baseMean	WW_F_H1_count	WW_F_H2_count	WW_F_H3_count	Log2FoldChange	pval	padj	Up/Down	Significant	Location	Source_Gene	NR:Seq-id	NR:Score	NR:Evalue	NR:Description	NT:Seq-id	NT:Score	NT:Evalue	NT:Description	Uniprot:UniProtKB-AC	Uniprot:Score	Uniprot:Evalue	Uniprot:Description	COG:gene	COG:Score	COG:Eval	COG:num	Pfam:pfam_ID	Pfam:pfam_Name	Pfam:pfam_Description	GO:biological_process	GO:cellular_component	GO:molecular_function	KEGG:KO	KEGG:Description
[truncated: 31,338 more rows]

[truncated: 2 more sheets: BB_L_H_WW_L_H, WW_F_H_WW_L_H]
