# Supplementary material for: Transcriptomic Analysis Reveals Differentially Expressed Circular RNAs Associated with Fecundity in the Sheep Hypothalamus with Different FecB Genotypes
Source: Animals (Basel). 2024 Jan 7;14(2):198. doi: 10.3390/ani14020198 (PMC10812736; doi:10.3390/ani14020198)
Supplement: Supplementary file 1 [file animals-14-00198-s001.zip › Table S5 Enrichment analysis of DE circRNAs.xlsx]

## Sheet: BB_F_H_BB_L_H
Table S5 Enrichment analysis of DE circRNAs
Name	Map	Count1	Count2	Count3	Count4	p	q	Gene_in_DE	Up_Gene	Up_Count	Down_Gene	Down_Count	Links	Result
Propanoate metabolism	map00640	3	34	62	8905	0.00234178	0.639306	gene14082|K01965;gene3825|K05605;gene5607|K01899	gene14082|K01965	1	gene3825|K05605;gene5607|K01899	2	http://www.kegg.jp/pathway/map00640+K01965+K05605+K01899	no
Valine, leucine and isoleucine degradation	map00280	3	53	62	8886	0.0075801	0.755324	gene14082|K01965;gene22760|K01640;gene3825|K05605	gene14082|K01965	1	gene22760|K01640;gene3825|K05605	2	http://www.kegg.jp/pathway/map00280+K01965+K01640+K05605	no
MAPK signaling pathway	map04010	6	246	59	8693	0.00941715	0.755324	gene10165|K04352;gene11746|K03099;gene14380|K08052;gene20777|K08018;gene24949|K05093;gene7901|K04858	gene11746|K03099;gene14380|K08052;gene20777|K08018;gene7901|K04858	4	gene10165|K04352;gene24949|K05093;gene7901|K04858	3	http://www.kegg.jp/pathway/map04010+K04352+K03099+K08052+K08018+K05093+K04858	no
Glycosaminoglycan biosynthesis - heparan sulfate / heparin	map00534	2	22	63	8917	0.0127861	0.755324	gene10329|K02578;gene10992|K01024	gene10329|K02578;gene10992|K01024	2	.	0	http://www.kegg.jp/pathway/map00534+K02578+K01024	no
Mismatch repair	map03430	2	23	63	8916	0.0138338	0.755324	gene10129|K08736;gene10606|K10754	gene10606|K10754	1	gene10129|K08736	1	http://www.kegg.jp/pathway/map03430+K08736+K10754	no
Prostate cancer	map05215	3	84	62	8855	0.0247598	0.844928	gene11746|K03099;gene20228|K02649;gene24949|K05093	gene11746|K03099;gene20228|K02649	2	gene24949|K05093	1	http://www.kegg.jp/pathway/map05215+K03099+K02649+K05093	no
Insulin secretion	map04911	3	83	62	8856	0.0240272	0.844928	gene13454|K15297;gene26499|K04962;gene7899|K16882	gene13454|K15297;gene7899|K16882	2	gene13454|K15297;gene26499|K04962	2	http://www.kegg.jp/pathway/map04911+K15297+K04962+K16882	no
Endocytosis	map04144	5	213	60	8726	0.0202594	0.844928	gene13145|K12488;gene21123|K00910;gene24949|K05093;gene27308|K12470;gene5304|K12488	gene13145|K12488;gene27308|K12470;gene5304|K12488	3	gene21123|K00910;gene24949|K05093	2	http://www.kegg.jp/pathway/map04144+K12488+K00910+K05093+K12470+K12488	no
Butanoate metabolism	map00650	2	35	63	8904	0.0290589	0.881453	gene11747|K00109;gene22760|K01640	gene11747|K00109	1	gene22760|K01640	1	http://www.kegg.jp/pathway/map00650+K00109+K01640	no
Measles	map05162	1	138	64	8801	0.637564	1	gene20228|K02649	gene20228|K02649	1	.	0	http://www.kegg.jp/pathway/map05162+K02649	no
Vascular smooth muscle contraction	map04270	0	118	65	8821	1	1	-	.	0	.	0	http://www.kegg.jp/pathway/map04270+	no
Hepatitis C	map05160	2	144	63	8795	0.284293	1	gene11746|K03099;gene20228|K02649	gene11746|K03099;gene20228|K02649	2	.	0	http://www.kegg.jp/pathway/map05160+K03099+K02649	no
Hepatitis B	map05161	1	179	64	8760	0.732148	1	gene20228|K02649	gene20228|K02649	1	.	0	http://www.kegg.jp/pathway/map05161+K02649	no
HTLV-I infection	map05166	1	307	64	8632	0.89675	1	gene20228|K02649	gene20228|K02649	1	.	0	http://www.kegg.jp/pathway/map05166+K02649	no
Prolactin signaling pathway	map04917	2	74	63	8865	0.104156	1	gene11746|K03099;gene20228|K02649	gene11746|K03099;gene20228|K02649	2	.	0	http://www.kegg.jp/pathway/map04917+K03099+K02649	no
Influenza A	map05164	1	188	64	8751	0.749399	1	gene20228|K02649	gene20228|K02649	1	.	0	http://www.kegg.jp/pathway/map05164+K02649	no
Viral carcinogenesis	map05203	1	247	64	8692	0.838299	1	gene20228|K02649	gene20228|K02649	1	.	0	http://www.kegg.jp/pathway/map05203+K02649	no
Transcriptional misregulation in cancer	map05202	0	177	65	8762	1	1	-	.	0	.	0	http://www.kegg.jp/pathway/map05202+	no
Herpes simplex infection	map05168	1	261	64	8678	0.854329	1	gene26103|K03121	.	0	gene26103|K03121	1	http://www.kegg.jp/pathway/map05168+K03121	no
Pathways in cancer	map05200	4	378	61	8561	0.297209	1	gene10129|K08736;gene11746|K03099;gene20228|K02649;gene24949|K05093	gene11746|K03099;gene20228|K02649	2	gene10129|K08736;gene24949|K05093	2	http://www.kegg.jp/pathway/map05200+K08736+K03099+K02649+K05093	no
Circadian rhythm - fly	map04711	0	10	65	8929	1	1	-	.	0	.	0	http://www.kegg.jp/pathway/map04711+	no
Proteoglycans in cancer	map05205	2	249	63	8690	0.544967	1	gene11746|K03099;gene20228|K02649	gene11746|K03099;gene20228|K02649	2	.	0	http://www.kegg.jp/pathway/map05205+K03099+K02649	no
Chemical carcinogenesis	map05204	0	86	65	8853	1	1	-	.	0	.	0	http://www.kegg.jp/pathway/map05204+	no
Nucleotide excision repair	map03420	1	51	64	8888	0.31465	1	gene10606|K10754	gene10606|K10754	1	.	0	http://www.kegg.jp/pathway/map03420+K10754	no
Phenylalanine metabolism	map00360	0	28	65	8911	1	1	-	.	0	.	0	http://www.kegg.jp/pathway/map00360+	no
Phosphatidylinositol signaling system	map04070	2	80	63	8859	0.118146	1	gene20228|K02649;gene20660|K01109	gene20228|K02649	1	gene20660|K01109	1	http://www.kegg.jp/pathway/map04070+K02649+K01109	no
2-Oxocarboxylic acid metabolism	map01210	0	21	65	8918	1	1	-	.	0	.	0	http://www.kegg.jp/pathway/map01210+	no
Pentose and glucuronate interconversions	map00040	0	42	65	8897	1	1	-	.	0	.	0	http://www.kegg.jp/pathway/map00040+	no
Systemic lupus erythematosus	map05322	0	128	65	8811	1	1	-	.	0	.	0	http://www.kegg.jp/pathway/map05322+	no
Glycosaminoglycan biosynthesis - chondroitin sulfate / dermatan sulfate	map00532	1	20	64	8919	0.141286	1	gene21328|K13499	gene21328|K13499	1	.	0	http://www.kegg.jp/pathway/map00532+K13499	no
Huntington's disease	map05016	3	269	62	8670	0.313223	1	gene11055|K04533;gene25295|K03943;gene6879|K10408	gene11055|K04533;gene25295|K03943;gene6879|K10408	3	.	0	http://www.kegg.jp/pathway/map05016+K04533+K03943+K10408	no
Rheumatoid arthritis	map05323	0	92	65	8847	1	1	-	.	0	.	0	http://www.kegg.jp/pathway/map05323+	no
Primary bile acid biosynthesis	map00120	0	15	65	8924	1	1	-	.	0	.	0	http://www.kegg.jp/pathway/map00120+	no
Biosynthesis of amino acids	map01230	0	93	65	8846	1	1	-	.	0	.	0	http://www.kegg.jp/pathway/map01230+	no
Bile secretion	map04976	0	107	65	8832	1	1	-	.	0	.	0	http://www.kegg.jp/pathway/map04976+	no
Vitamin digestion and absorption	map04977	0	25	65	8914	1	1	-	.	0	.	0	http://www.kegg.jp/pathway/map04977+	no
Protein digestion and absorption	map04974	1	81	64	8858	0.449432	1	gene3279|K08135	.	0	gene3279|K08135	1	http://www.kegg.jp/pathway/map04974+K08135	no
Fat digestion and absorption	map04975	0	57	65	8882	1	1	-	.	0	.	0	http://www.kegg.jp/pathway/map04975+	no
Pancreatic secretion	map04972	1	104	64	8835	0.534754	1	gene26499|K04962	.	0	gene26499|K04962	1	http://www.kegg.jp/pathway/map04972+K04962	no
Glyoxylate and dicarboxylate metabolism	map00630	1	33	64	8906	0.218696	1	gene14082|K01965	gene14082|K01965	1	.	0	http://www.kegg.jp/pathway/map00630+K01965	no
Salivary secretion	map04970	0	94	65	8845	1	1	-	.	0	.	0	http://www.kegg.jp/pathway/map04970+	no
Gastric acid secretion	map04971	0	76	65	8863	1	1	-	.	0	.	0	http://www.kegg.jp/pathway/map04971+	no
Mineral absorption	map04978	0	88	65	8851	1	1	-	.	0	.	0	http://www.kegg.jp/pathway/map04978+	no
Glioma	map05214	2	62	63	8877	0.0777737	1	gene11746|K03099;gene20228|K02649	gene11746|K03099;gene20228|K02649	2	.	0	http://www.kegg.jp/pathway/map05214+K03099+K02649	no
Thyroid cancer	map05216	0	36	65	8903	1	1	-	.	0	.	0	http://www.kegg.jp/pathway/map05216+	no
Epstein-Barr virus infection	map05169	1	219	64	8720	0.800855	1	gene20228|K02649	gene20228|K02649	1	.	0	http://www.kegg.jp/pathway/map05169+K02649	no
Colorectal cancer	map05210	2	87	63	8852	0.135023	1	gene10129|K08736;gene20228|K02649	gene20228|K02649	1	gene10129|K08736	1	http://www.kegg.jp/pathway/map05210+K08736+K02649	no
Renal cell carcinoma	map05211	2	75	63	8864	0.106454	1	gene11746|K03099;gene20228|K02649	gene11746|K03099;gene20228|K02649	2	.	0	http://www.kegg.jp/pathway/map05211+K03099+K02649	no
Pancreatic cancer	map05212	1	79	64	8860	0.441323	1	gene20228|K02649	gene20228|K02649	1	.	0	http://www.kegg.jp/pathway/map05212+K02649	no
Endometrial cancer	map05213	2	55	63	8884	0.0635563	1	gene11746|K03099;gene20228|K02649	gene11746|K03099;gene20228|K02649	2	.	0	http://www.kegg.jp/pathway/map05213+K03099+K02649	no
Arginine and proline metabolism	map00330	1	74	64	8865	0.420531	1	gene19644|K00472	gene19644|K00472	1	.	0	http://www.kegg.jp/pathway/map00330+K00472	no
Melanoma	map05218	1	69	64	8870	0.398978	1	gene20228|K02649	gene20228|K02649	1	.	0	http://www.kegg.jp/pathway/map05218+K02649	no
Bladder cancer	map05219	0	42	65	8897	1	1	-	.	0	.	0	http://www.kegg.jp/pathway/map05219+	no
Tryptophan metabolism	map00380	0	52	65	8887	1	1	-	.	0	.	0	http://www.kegg.jp/pathway/map00380+	no
Cytokine-cytokine receptor interaction	map04060	0	225	65	8714	1	1	-	.	0	.	0	http://www.kegg.jp/pathway/map04060+	no
Maturity onset diabetes of the young	map04950	1	21	64	8918	0.147499	1	gene13357|K08037	gene13357|K08037	1	.	0	http://www.kegg.jp/pathway/map04950+K08037	no
Chemokine signaling pathway	map04062	3	179	62	8760	0.14385	1	gene11746|K03099;gene20228|K02649;gene21123|K00910	gene11746|K03099;gene20228|K02649	2	gene21123|K00910	1	http://www.kegg.jp/pathway/map04062+K03099+K02649+K00910	no
Proteasome	map03050	0	53	65	8886	1	1	-	.	0	.	0	http://www.kegg.jp/pathway/map03050+	no
NF-kappa B signaling pathway	map04064	1	93	64	8846	0.49571	1	gene7448|K16072	.	0	gene7448|K16072	1	http://www.kegg.jp/pathway/map04064+K16072	no
HIF-1 signaling pathway	map04066	1	139	64	8800	0.640222	1	gene20228|K02649	gene20228|K02649	1	.	0	http://www.kegg.jp/pathway/map04066+K02649	no
Leukocyte transendothelial migration	map04670	1	125	64	8814	0.601208	1	gene20228|K02649	gene20228|K02649	1	.	0	http://www.kegg.jp/pathway/map04670+K02649	no
Intestinal immune network for IgA production	map04672	0	42	65	8897	1	1	-	.	0	.	0	http://www.kegg.jp/pathway/map04672+	no
Prion diseases	map05020	1	33	64	8906	0.218696	1	gene19061|K06491	.	0	gene19061|K06491	1	http://www.kegg.jp/pathway/map05020+K06491	no
Thiamine metabolism	map00730	0	4	65	8935	1	1	-	.	0	.	0	http://www.kegg.jp/pathway/map00730+	no
TGF-beta signaling pathway	map04350	0	88	65	8851	1	1	-	.	0	.	0	http://www.kegg.jp/pathway/map04350+	no
Homologous recombination	map03440	0	30	65	8909	1	1	-	.	0	.	0	http://www.kegg.jp/pathway/map03440+	no
Focal adhesion	map04510	2	198	63	8741	0.425416	1	gene11746|K03099;gene20228|K02649	gene11746|K03099;gene20228|K02649	2	.	0	http://www.kegg.jp/pathway/map04510+K03099+K02649	no
ECM-receptor interaction	map04512	0	82	65	8857	1	1	-	.	0	.	0	http://www.kegg.jp/pathway/map04512+	no
Cell adhesion molecules (CAMs)	map04514	3	130	62	8809	0.0710726	1	gene10153|K06793;gene11306|K06766;gene19061|K06491	gene11306|K06766	1	gene10153|K06793;gene19061|K06491	2	http://www.kegg.jp/pathway/map04514+K06793+K06766+K06491	no
Ubiquinone and other terpenoid-quinone biosynthesis	map00130	0	12	65	8927	1	1	-	.	0	.	0	http://www.kegg.jp/pathway/map00130+	no
Asthma	map05310	0	23	65	8916	1	1	-	.	0	.	0	http://www.kegg.jp/pathway/map05310+	no
Spliceosome	map03040	1	245	64	8694	0.835872	1	gene17246|K12864	gene17246|K12864	1	.	0	http://www.kegg.jp/pathway/map03040+K12864	no
Pyruvate metabolism	map00620	0	50	65	8889	1	1	-	.	0	.	0	http://www.kegg.jp/pathway/map00620+	no
Pentose phosphate pathway	map00030	0	39	65	8900	1	1	-	.	0	.	0	http://www.kegg.jp/pathway/map00030+	no
Purine metabolism	map00230	0	185	65	8754	1	1	-	.	0	.	0	http://www.kegg.jp/pathway/map00230+	no
Caffeine metabolism	map00232	0	4	65	8935	1	1	-	.	0	.	0	http://www.kegg.jp/pathway/map00232+	no
Oocyte meiosis	map04114	0	148	65	8791	1	1	-	.	0	.	0	http://www.kegg.jp/pathway/map04114+	no
p53 signaling pathway	map04115	0	106	65	8833	1	1	-	.	0	.	0	http://www.kegg.jp/pathway/map04115+	no
Non-small cell lung cancer	map05223	2	55	63	8884	0.0635563	1	gene11746|K03099;gene20228|K02649	gene11746|K03099;gene20228|K02649	2	.	0	http://www.kegg.jp/pathway/map05223+K03099+K02649	no
Small cell lung cancer	map05222	1	119	64	8820	0.583239	1	gene20228|K02649	gene20228|K02649	1	.	0	http://www.kegg.jp/pathway/map05222+K02649	no
Cell cycle	map04110	2	168	63	8771	0.348239	1	gene2518|K09392;gene4141|K02606	gene2518|K09392	1	gene4141|K02606	1	http://www.kegg.jp/pathway/map04110+K09392+K02606	no
Lysine biosynthesis	map00300	0	4	65	8935	1	1	-	.	0	.	0	http://www.kegg.jp/pathway/map00300+	no
Primary immunodeficiency	map05340	0	34	65	8905	1	1	-	.	0	.	0	http://www.kegg.jp/pathway/map05340+	no
Bacterial invasion of epithelial cells	map05100	1	93	64	8846	0.49571	1	gene20228|K02649	gene20228|K02649	1	.	0	http://www.kegg.jp/pathway/map05100+K02649	no
Olfactory transduction	map04740	0	1246	65	7693	1	1	-	.	0	.	0	http://www.kegg.jp/pathway/map04740+	no
Taste transduction	map04742	0	29	65	8910	1	1	-	.	0	.	0	http://www.kegg.jp/pathway/map04742+	no
Phototransduction - fly	map04745	1	27	64	8912	0.183862	1	gene21123|K00910	.	0	gene21123|K00910	1	http://www.kegg.jp/pathway/map04745+K00910	no
Phototransduction	map04744	0	25	65	8914	1	1	-	.	0	.	0	http://www.kegg.jp/pathway/map04744+	no
TNF signaling pathway	map04668	1	113	64	8826	0.564473	1	gene20228|K02649	gene20228|K02649	1	.	0	http://www.kegg.jp/pathway/map04668+K02649	no
Apoptosis	map04210	1	104	64	8835	0.534754	1	gene20228|K02649	gene20228|K02649	1	.	0	http://www.kegg.jp/pathway/map04210+K02649	no
Fc gamma R-mediated phagocytosis	map04666	3	103	62	8836	0.0409474	1	gene13145|K12488;gene20228|K02649;gene5304|K12488	gene13145|K12488;gene20228|K02649;gene5304|K12488	3	.	0	http://www.kegg.jp/pathway/map04666+K12488+K02649+K12488	no
Fc epsilon RI signaling pathway	map04664	2	65	63	8874	0.0841474	1	gene11746|K03099;gene20228|K02649	gene11746|K03099;gene20228|K02649	2	.	0	http://www.kegg.jp/pathway/map04664+K03099+K02649	no
B cell receptor signaling pathway	map04662	2	68	63	8871	0.0906752	1	gene11746|K03099;gene20228|K02649	gene11746|K03099;gene20228|K02649	2	.	0	http://www.kegg.jp/pathway/map04662+K03099+K02649	no
Glycosphingolipid biosynthesis - ganglio series	map00604	0	17	65	8922	1	1	-	.	0	.	0	http://www.kegg.jp/pathway/map00604+	no
T cell receptor signaling pathway	map04660	2	100	63	8839	0.167639	1	gene11746|K03099;gene20228|K02649	gene11746|K03099;gene20228|K02649	2	.	0	http://www.kegg.jp/pathway/map04660+K03099+K02649	no
Non-homologous end-joining	map03450	1	14	64	8925	0.103057	1	gene4451|K10885	gene4451|K10885	1	.	0	http://www.kegg.jp/pathway/map03450+K10885	no
PPAR signaling pathway	map03320	0	69	65	8870	1	1	-	.	0	.	0	http://www.kegg.jp/pathway/map03320+	no
Dorso-ventral axis formation	map04320	1	32	64	8907	0.212994	1	gene11746|K03099	gene11746|K03099	1	.	0	http://www.kegg.jp/pathway/map04320+K03099	no
Thyroid hormone synthesis	map04918	0	70	65	8869	1	1	-	.	0	.	0	http://www.kegg.jp/pathway/map04918+	no
Adherens junction	map04520	0	80	65	8859	1	1	-	.	0	.	0	http://www.kegg.jp/pathway/map04520+	no
Progesterone-mediated oocyte maturation	map04914	1	106	64	8833	0.541526	1	gene20228|K02649	gene20228|K02649	1	.	0	http://www.kegg.jp/pathway/map04914+K02649	no
Estrogen signaling pathway	map04915	2	97	63	8842	0.159987	1	gene11746|K03099;gene20228|K02649	gene11746|K03099;gene20228|K02649	2	.	0	http://www.kegg.jp/pathway/map04915+K03099+K02649	no
Melanogenesis	map04916	0	103	65	8836	1	1	-	.	0	.	0	http://www.kegg.jp/pathway/map04916+	no
Steroid hormone biosynthesis	map00140	0	62	65	8877	1	1	-	.	0	.	0	http://www.kegg.jp/pathway/map00140+	no
Insulin signaling pathway	map04910	2	167	63	8772	0.345604	1	gene11746|K03099;gene20228|K02649	gene11746|K03099;gene20228|K02649	2	.	0	http://www.kegg.jp/pathway/map04910+K03099+K02649	no
GnRH signaling pathway	map04912	1	87	64	8852	0.473071	1	gene11746|K03099	gene11746|K03099	1	.	0	http://www.kegg.jp/pathway/map04912+K03099	no
Ovarian steroidogenesis	map04913	0	55	65	8884	1	1	-	.	0	.	0	http://www.kegg.jp/pathway/map04913+	no
Citrate cycle (TCA cycle)	map00020	1	38	64	8901	0.246603	1	gene5607|K01899	.	0	gene5607|K01899	1	http://www.kegg.jp/pathway/map00020+K01899	no
Graft-versus-host disease	map05332	0	32	65	8907	1	1	-	.	0	.	0	http://www.kegg.jp/pathway/map05332+	no
Biotin metabolism	map00780	0	4	65	8935	1	1	-	.	0	.	0	http://www.kegg.jp/pathway/map00780+	no
Lipoic acid metabolism	map00785	0	3	65	8936	1	1	-	.	0	.	0	http://www.kegg.jp/pathway/map00785+	no
Ubiquitin mediated proteolysis	map04120	2	193	63	8746	0.412847	1	gene26576|K10615;gene5926|K10586	gene5926|K10586	1	gene26576|K10615	1	http://www.kegg.jp/pathway/map04120+K10615+K10586	no
Allograft rejection	map05330	0	37	65	8902	1	1	-	.	0	.	0	http://www.kegg.jp/pathway/map05330+	no
Lysine degradation	map00310	1	85	64	8854	0.465304	1	gene7951|K09189	.	0	gene7951|K09189	1	http://www.kegg.jp/pathway/map00310+K09189	no
Legionellosis	map05134	0	113	65	8826	1	1	-	.	0	.	0	http://www.kegg.jp/pathway/map05134+	no
Carbon metabolism	map01200	2	119	63	8820	0.217329	1	gene14082|K01965;gene5607|K01899	gene14082|K01965	1	gene5607|K01899	1	http://www.kegg.jp/pathway/map01200+K01965+K01899	no
Pertussis	map05133	0	86	65	8853	1	1	-	.	0	.	0	http://www.kegg.jp/pathway/map05133+	no
Salmonella infection	map05132	0	106	65	8833	1	1	-	.	0	.	0	http://www.kegg.jp/pathway/map05132+	no
Sulfur relay system	map04122	0	14	65	8925	1	1	-	.	0	.	0	http://www.kegg.jp/pathway/map04122+	no
Alcoholism	map05034	1	176	64	8763	0.726142	1	gene11746|K03099	gene11746|K03099	1	.	0	http://www.kegg.jp/pathway/map05034+K03099	no
Antigen processing and presentation	map04612	0	77	65	8862	1	1	-	.	0	.	0	http://www.kegg.jp/pathway/map04612+	no
Alanine, aspartate and glutamate metabolism	map00250	0	42	65	8897	1	1	-	.	0	.	0	http://www.kegg.jp/pathway/map00250+	no
Cocaine addiction	map05030	0	51	65	8888	1	1	-	.	0	.	0	http://www.kegg.jp/pathway/map05030+	no
Amphetamine addiction	map05031	0	71	65	8868	1	1	-	.	0	.	0	http://www.kegg.jp/pathway/map05031+	no
Morphine addiction	map05032	1	77	64	8862	0.433096	1	gene21123|K00910	.	0	gene21123|K00910	1	http://www.kegg.jp/pathway/map05032+K00910	no
Renin-angiotensin system	map04614	1	17	64	8922	0.122376	1	gene10227|K01257	gene10227|K01257	1	.	0	http://www.kegg.jp/pathway/map04614+K01257	no
GABAergic synapse	map04727	1	87	64	8852	0.473071	1	gene4305|K15375	gene4305|K15375	1	.	0	http://www.kegg.jp/pathway/map04727+K15375	no
Serotonergic synapse	map04726	0	112	65	8827	1	1	-	.	0	.	0	http://www.kegg.jp/pathway/map04726+	no
Cholinergic synapse	map04725	2	107	63	8832	0.185729	1	gene12959|K04930;gene20228|K02649	gene20228|K02649	1	gene12959|K04930	1	http://www.kegg.jp/pathway/map04725+K04930+K02649	no
Glutamatergic synapse	map04724	1	113	64	8826	0.564473	1	gene21123|K00910	.	0	gene21123|K00910	1	http://www.kegg.jp/pathway/map04724+K00910	no
Retrograde endocannabinoid signaling	map04723	0	101	65	8838	1	1	-	.	0	.	0	http://www.kegg.jp/pathway/map04723+	no
Neurotrophin signaling pathway	map04722	2	123	63	8816	0.227979	1	gene11746|K03099;gene20228|K02649	gene11746|K03099;gene20228|K02649	2	.	0	http://www.kegg.jp/pathway/map04722+K03099+K02649	no
Tight junction	map04530	1	140	64	8799	0.64286	1	gene4707|K06107	.	0	gene4707|K06107	1	http://www.kegg.jp/pathway/map04530+K06107	no
Long-term potentiation	map04720	0	71	65	8868	1	1	-	.	0	.	0	http://www.kegg.jp/pathway/map04720+	no
Protein export	map03060	0	22	65	8917	1	1	-	.	0	.	0	http://www.kegg.jp/pathway/map03060+	no
Phenylalanine, tyrosine and tryptophan biosynthesis	map00400	0	6	65	8933	1	1	-	.	0	.	0	http://www.kegg.jp/pathway/map00400+	no
Glycolysis / Gluconeogenesis	map00010	0	86	65	8853	1	1	-	.	0	.	0	http://www.kegg.jp/pathway/map00010+	no
Dopaminergic synapse	map04728	0	138	65	8801	1	1	-	.	0	.	0	http://www.kegg.jp/pathway/map04728+	no
Ether lipid metabolism	map00565	0	47	65	8892	1	1	-	.	0	.	0	http://www.kegg.jp/pathway/map00565+	no
Glycerophospholipid metabolism	map00564	0	99	65	8840	1	1	-	.	0	.	0	http://www.kegg.jp/pathway/map00564+	no
Autophagy	map04140	0	35	65	8904	1	1	-	.	0	.	0	http://www.kegg.jp/pathway/map04140+	no
Glycerolipid metabolism	map00561	0	58	65	8881	1	1	-	.	0	.	0	http://www.kegg.jp/pathway/map00561+	no
Glycosylphosphatidylinositol (GPI)-anchor biosynthesis	map00563	0	32	65	8907	1	1	-	.	0	.	0	http://www.kegg.jp/pathway/map00563+	no
Inositol phosphate metabolism	map00562	1	61	64	8878	0.362841	1	gene20660|K01109	.	0	gene20660|K01109	1	http://www.kegg.jp/pathway/map00562+K01109	no
Base excision repair	map03410	0	45	65	8894	1	1	-	.	0	.	0	http://www.kegg.jp/pathway/map03410+	no
Folate biosynthesis	map00790	0	14	65	8925	1	1	-	.	0	.	0	http://www.kegg.jp/pathway/map00790+	no
Acute myeloid leukemia	map05221	2	60	63	8879	0.073615	1	gene11746|K03099;gene20228|K02649	gene11746|K03099;gene20228|K02649	2	.	0	http://www.kegg.jp/pathway/map05221+K03099+K02649	no
SNARE interactions in vesicular transport	map04130	0	40	65	8899	1	1	-	.	0	.	0	http://www.kegg.jp/pathway/map04130+	no
Glycosaminoglycan degradation	map00531	0	22	65	8917	1	1	-	.	0	.	0	http://www.kegg.jp/pathway/map00531+	no
Autoimmune thyroid disease	map05320	0	46	65	8893	1	1	-	.	0	.	0	http://www.kegg.jp/pathway/map05320+	no
Inflammatory bowel disease (IBD)	map05321	0	55	65	8884	1	1	-	.	0	.	0	http://www.kegg.jp/pathway/map05321+	no
Complement and coagulation cascades	map04610	0	79	65	8860	1	1	-	.	0	.	0	http://www.kegg.jp/pathway/map04610+	no
Chronic myeloid leukemia	map05220	2	79	63	8860	0.115782	1	gene11746|K03099;gene20228|K02649	gene11746|K03099;gene20228|K02649	2	.	0	http://www.kegg.jp/pathway/map05220+K03099+K02649	no
Pyrimidine metabolism	map00240	1	109	64	8830	0.551503	1	gene6946|K00384	.	0	gene6946|K00384	1	http://www.kegg.jp/pathway/map00240+K00384	no
beta-Alanine metabolism	map00410	1	39	64	8900	0.252065	1	gene3825|K05605	.	0	gene3825|K05605	1	http://www.kegg.jp/pathway/map00410+K05605	no
Amoebiasis	map05146	1	102	64	8837	0.527884	1	gene20228|K02649	gene20228|K02649	1	.	0	http://www.kegg.jp/pathway/map05146+K02649	no
Glutathione metabolism	map00480	0	64	65	8875	1	1	-	.	0	.	0	http://www.kegg.jp/pathway/map00480+	no
Hippo signaling pathway - fly	map04391	1	83	64	8856	0.457425	1	gene16409|K16681	gene16409|K16681	1	.	0	http://www.kegg.jp/pathway/map04391+K16681	no
Hedgehog signaling pathway	map04340	0	55	65	8884	1	1	-	.	0	.	0	http://www.kegg.jp/pathway/map04340+	no
Aminoacyl-tRNA biosynthesis	map00970	2	47	63	8892	0.0485683	1	gene11217|K00604;gene23865|K01893	gene11217|K00604	1	gene11217|K00604	1	http://www.kegg.jp/pathway/map00970+K00604+K01893	no
DNA replication	map03030	1	45	64	8894	0.284031	1	gene10606|K10754	gene10606|K10754	1	.	0	http://www.kegg.jp/pathway/map03030+K10754	no
Notch signaling pathway	map04330	0	59	65	8880	1	1	-	.	0	.	0	http://www.kegg.jp/pathway/map04330+	no
Adipocytokine signaling pathway	map04920	0	72	65	8867	1	1	-	.	0	.	0	http://www.kegg.jp/pathway/map04920+	no
Long-term depression	map04730	0	57	65	8882	1	1	-	.	0	.	0	http://www.kegg.jp/pathway/map04730+	no
Gap junction	map04540	1	93	64	8846	0.49571	1	gene11746|K03099	gene11746|K03099	1	.	0	http://www.kegg.jp/pathway/map04540+K03099	no
Chagas disease (American trypanosomiasis)	map05142	1	121	64	8818	0.589315	1	gene20228|K02649	gene20228|K02649	1	.	0	http://www.kegg.jp/pathway/map05142+K02649	no
One carbon pool by folate	map00670	1	24	64	8915	0.165876	1	gene11217|K00604	gene11217|K00604	1	gene11217|K00604	1	http://www.kegg.jp/pathway/map00670+K00604	no
Type II diabetes mellitus	map04930	1	44	64	8895	0.278798	1	gene20228|K02649	gene20228|K02649	1	.	0	http://www.kegg.jp/pathway/map04930+K02649	no
Terpenoid backbone biosynthesis	map00900	0	24	65	8915	1	1	-	.	0	.	0	http://www.kegg.jp/pathway/map00900+	no
Taurine and hypotaurine metabolism	map00430	0	11	65	8928	1	1	-	.	0	.	0	http://www.kegg.jp/pathway/map00430+	no
Fructose and mannose metabolism	map00051	0	27	65	8912	1	1	-	.	0	.	0	http://www.kegg.jp/pathway/map00051+	no
Nicotinate and nicotinamide metabolism	map00760	1	32	64	8907	0.212994	1	gene20350|K00323	.	0	gene20350|K00323	1	http://www.kegg.jp/pathway/map00760+K00323	no
Glycosaminoglycan biosynthesis - keratan sulfate	map00533	0	16	65	8923	1	1	-	.	0	.	0	http://www.kegg.jp/pathway/map00533+	no
Fanconi anemia pathway	map03460	0	54	65	8885	1	1	-	.	0	.	0	http://www.kegg.jp/pathway/map03460+	no
Nicotine addiction	map05033	0	41	65	8898	1	1	-	.	0	.	0	http://www.kegg.jp/pathway/map05033+	no
D-Arginine and D-ornithine metabolism	map00472	0	1	65	8938	1	1	-	.	0	.	0	http://www.kegg.jp/pathway/map00472+	no
D-Glutamine and D-glutamate metabolism	map00471	0	6	65	8933	1	1	-	.	0	.	0	http://www.kegg.jp/pathway/map00471+	no
Carbohydrate digestion and absorption	map04973	1	46	64	8893	0.289226	1	gene20228|K02649	gene20228|K02649	1	.	0	http://www.kegg.jp/pathway/map04973+K02649	no
Osteoclast differentiation	map04380	1	132	64	8807	0.621209	1	gene20228|K02649	gene20228|K02649	1	.	0	http://www.kegg.jp/pathway/map04380+K02649	no
Calcium signaling pathway	map04020	1	192	64	8747	0.756711	1	gene26499|K04962	.	0	gene26499|K04962	1	http://www.kegg.jp/pathway/map04020+K04962	no
Cysteine and methionine metabolism	map00270	0	48	65	8891	1	1	-	.	0	.	0	http://www.kegg.jp/pathway/map00270+	no
Tuberculosis	map05152	0	201	65	8738	1	1	-	.	0	.	0	http://www.kegg.jp/pathway/map05152+	no
Staphylococcus aureus infection	map05150	0	54	65	8885	1	1	-	.	0	.	0	http://www.kegg.jp/pathway/map05150+	no
Jak-STAT signaling pathway	map04630	3	167	62	8772	0.124195	1	gene11631|K04703;gene11746|K03099;gene20228|K02649	gene11746|K03099;gene20228|K02649	2	gene11631|K04703	1	http://www.kegg.jp/pathway/map04630+K04703+K03099+K02649	no
Phagosome	map04145	0	162	65	8777	1	1	-	.	0	.	0	http://www.kegg.jp/pathway/map04145+	no
Drug metabolism - other enzymes	map00983	0	54	65	8885	1	1	-	.	0	.	0	http://www.kegg.jp/pathway/map00983+	no
Drug metabolism - cytochrome P450	map00982	0	80	65	8859	1	1	-	.	0	.	0	http://www.kegg.jp/pathway/map00982+	no
Protein processing in endoplasmic reticulum	map04141	3	220	62	8719	0.217501	1	gene16297|K10086;gene22086|K07151;gene9752|K14007	gene16297|K10086;gene22086|K07151	2	gene9752|K14007	1	http://www.kegg.jp/pathway/map04141+K10086+K07151+K14007	no
Metabolism of xenobiotics by cytochrome P450	map00980	0	90	65	8849	1	1	-	.	0	.	0	http://www.kegg.jp/pathway/map00980+	no
Parkinson's disease	map05012	1	204	64	8735	0.777408	1	gene25295|K03943	gene25295|K03943	1	.	0	http://www.kegg.jp/pathway/map05012+K03943	no
MAPK signaling pathway - fly	map04013	1	17	64	8922	0.122376	1	gene11746|K03099	gene11746|K03099	1	.	0	http://www.kegg.jp/pathway/map04013+K03099	no
Alzheimer's disease	map05010	1	237	64	8702	0.825799	1	gene25295|K03943	gene25295|K03943	1	.	0	http://www.kegg.jp/pathway/map05010+K03943	no
Porphyrin and chlorophyll metabolism	map00860	0	94	65	8845	1	1	-	.	0	.	0	http://www.kegg.jp/pathway/map00860+	no
Amyotrophic lateral sclerosis (ALS)	map05014	0	67	65	8872	1	1	-	.	0	.	0	http://www.kegg.jp/pathway/map05014+	no
RIG-I-like receptor signaling pathway	map04622	0	79	65	8860	1	1	-	.	0	.	0	http://www.kegg.jp/pathway/map04622+	no
Synaptic vesicle cycle	map04721	0	72	65	8867	1	1	-	.	0	.	0	http://www.kegg.jp/pathway/map04721+	no
PI3K-Akt signaling pathway	map04151	3	373	62	8566	0.514212	1	gene11746|K03099;gene20228|K02649;gene24949|K05093	gene11746|K03099;gene20228|K02649	2	gene24949|K05093	1	http://www.kegg.jp/pathway/map04151+K03099+K02649+K05093	no
Nitrogen metabolism	map00910	0	31	65	8908	1	1	-	.	0	.	0	http://www.kegg.jp/pathway/map00910+	no
Synthesis and degradation of ketone bodies	map00072	1	13	64	8926	0.0965245	1	gene22760|K01640	.	0	gene22760|K01640	1	http://www.kegg.jp/pathway/map00072+K01640	no
Fatty acid degradation	map00071	0	45	65	8894	1	1	-	.	0	.	0	http://www.kegg.jp/pathway/map00071+	no
ABC transporters	map02010	1	86	64	8853	0.469202	1	gene6565|K05676	.	0	gene6565|K05676	1	http://www.kegg.jp/pathway/map02010+K05676	no
Pantothenate and CoA biosynthesis	map00770	1	17	64	8922	0.122376	1	gene20113|K09680	.	0	gene20113|K09680	1	http://www.kegg.jp/pathway/map00770+K09680	no
Starch and sucrose metabolism	map00500	1	63	64	8876	0.372071	1	gene5695|K08678	gene5695|K08678	1	.	0	http://www.kegg.jp/pathway/map00500+K08678	no
Ribosome biogenesis in eukaryotes	map03008	0	123	65	8816	1	1	-	.	0	.	0	http://www.kegg.jp/pathway/map03008+	no
Biosynthesis of unsaturated fatty acids	map01040	0	25	65	8914	1	1	-	.	0	.	0	http://www.kegg.jp/pathway/map01040+	no
Type I diabetes mellitus	map04940	0	40	65	8899	1	1	-	.	0	.	0	http://www.kegg.jp/pathway/map04940+	no
Malaria	map05144	0	52	65	8887	1	1	-	.	0	.	0	http://www.kegg.jp/pathway/map05144+	no
Toxoplasmosis	map05145	1	132	64	8807	0.621209	1	gene20228|K02649	gene20228|K02649	1	.	0	http://www.kegg.jp/pathway/map05145+K02649	no
Hippo signaling pathway	map04390	1	174	64	8765	0.722065	1	gene16409|K16681	gene16409|K16681	1	.	0	http://www.kegg.jp/pathway/map04390+K16681	no
ErbB signaling pathway	map04012	2	80	63	8859	0.118146	1	gene11746|K03099;gene20228|K02649	gene11746|K03099;gene20228|K02649	2	.	0	http://www.kegg.jp/pathway/map04012+K03099+K02649	no
Leishmaniasis	map05140	0	65	65	8874	1	1	-	.	0	.	0	http://www.kegg.jp/pathway/map05140+	no
Glycine, serine and threonine metabolism	map00260	0	50	65	8889	1	1	-	.	0	.	0	http://www.kegg.jp/pathway/map00260+	no
African trypanosomiasis	map05143	0	33	65	8906	1	1	-	.	0	.	0	http://www.kegg.jp/pathway/map05143+	no
Cardiac muscle contraction	map04260	2	91	63	8848	0.1449	1	gene26499|K04962;gene7901|K04858	gene7901|K04858	1	gene26499|K04962;gene7901|K04858	2	http://www.kegg.jp/pathway/map04260+K04962+K04858	no
Neomycin, kanamycin and gentamicin biosynthesis	map00524	0	6	65	8933	1	1	-	.	0	.	0	http://www.kegg.jp/pathway/map00524+	no
mTOR signaling pathway	map04150	1	88	64	8851	0.476912	1	gene20228|K02649	gene20228|K02649	1	.	0	http://www.kegg.jp/pathway/map04150+K02649	no
Cytosolic DNA-sensing pathway	map04623	0	58	65	8881	1	1	-	.	0	.	0	http://www.kegg.jp/pathway/map04623+	no
Toll-like receptor signaling pathway	map04620	1	108	64	8831	0.548201	1	gene20228|K02649	gene20228|K02649	1	.	0	http://www.kegg.jp/pathway/map04620+K02649	no
Basal cell carcinoma	map05217	0	58	65	8881	1	1	-	.	0	.	0	http://www.kegg.jp/pathway/map05217+	no
Viral myocarditis	map05416	0	75	65	8864	1	1	-	.	0	.	0	http://www.kegg.jp/pathway/map05416+	no
Dilated cardiomyopathy	map05414	2	85	63	8854	0.130145	1	gene26499|K04962;gene7901|K04858	gene7901|K04858	1	gene26499|K04962;gene7901|K04858	2	http://www.kegg.jp/pathway/map05414+K04962+K04858	no
Arrhythmogenic right ventricular cardiomyopathy (ARVC)	map05412	2	69	63	8870	0.0928837	1	gene26499|K04962;gene7901|K04858	gene7901|K04858	1	gene26499|K04962;gene7901|K04858	2	http://www.kegg.jp/pathway/map05412+K04962+K04858	no
Wnt signaling pathway	map04310	1	153	64	8786	0.675472	1	gene27199|K04508	.	0	gene27199|K04508	1	http://www.kegg.jp/pathway/map04310+K04508	no
Hypertrophic cardiomyopathy (HCM)	map05410	2	83	63	8856	0.125311	1	gene26499|K04962;gene7901|K04858	gene7901|K04858	1	gene26499|K04962;gene7901|K04858	2	http://www.kegg.jp/pathway/map05410+K04962+K04858	no
Sulfur metabolism	map00920	0	16	65	8923	1	1	-	.	0	.	0	http://www.kegg.jp/pathway/map00920+	no
Fatty acid elongation	map00062	0	29	65	8910	1	1	-	.	0	.	0	http://www.kegg.jp/pathway/map00062+	no
Natural killer cell mediated cytotoxicity	map04650	2	130	63	8809	0.246704	1	gene11746|K03099;gene20228|K02649	gene11746|K03099;gene20228|K02649	2	.	0	http://www.kegg.jp/pathway/map04650+K03099+K02649	no
Other types of O-glycan biosynthesis	map00514	0	36	65	8903	1	1	-	.	0	.	0	http://www.kegg.jp/pathway/map00514+	no
Regulation of actin cytoskeleton	map04810	3	243	62	8696	0.261827	1	gene11746|K03099;gene20228|K02649;gene24949|K05093	gene11746|K03099;gene20228|K02649	2	gene24949|K05093	1	http://www.kegg.jp/pathway/map04810+K03099+K02649+K05093	no
N-Glycan biosynthesis	map00510	1	62	64	8877	0.367473	1	gene22086|K07151	gene22086|K07151	1	.	0	http://www.kegg.jp/pathway/map00510+K07151	no
Other glycan degradation	map00511	0	28	65	8911	1	1	-	.	0	.	0	http://www.kegg.jp/pathway/map00511+	no
Mucin type O-glycan biosynthesis	map00512	1	34	64	8905	0.224358	1	gene25166|K00710	gene25166|K00710	1	.	0	http://www.kegg.jp/pathway/map00512+K00710	no
Axon guidance	map04360	2	135	63	8804	0.260121	1	gene10165|K04352;gene27028|K07521	gene27028|K07521	1	gene10165|K04352	1	http://www.kegg.jp/pathway/map04360+K04352+K07521	no
RNA degradation	map03018	1	81	64	8858	0.449432	1	gene25794|K01148	gene25794|K01148	1	.	0	http://www.kegg.jp/pathway/map03018+K01148	no
Selenocompound metabolism	map00450	1	26	64	8913	0.177909	1	gene6946|K00384	.	0	gene6946|K00384	1	http://www.kegg.jp/pathway/map00450+K00384	no
Steroid biosynthesis	map00100	0	18	65	8921	1	1	-	.	0	.	0	http://www.kegg.jp/pathway/map00100+	no
Ribosome	map03010	0	772	65	8167	1	1	-	.	0	.	0	http://www.kegg.jp/pathway/map03010+	no
Histidine metabolism	map00340	0	25	65	8914	1	1	-	.	0	.	0	http://www.kegg.jp/pathway/map00340+	no
RNA transport	map03013	0	269	65	8670	1	1	-	.	0	.	0	http://www.kegg.jp/pathway/map03013+	no
mRNA surveillance pathway	map03015	0	147	65	8792	1	1	-	.	0	.	0	http://www.kegg.jp/pathway/map03015+	no
Aldosterone-regulated sodium reabsorption	map04960	1	40	64	8899	0.257489	1	gene20228|K02649	gene20228|K02649	1	.	0	http://www.kegg.jp/pathway/map04960+K02649	no
Oxidative phosphorylation	map00190	1	197	64	8742	0.765555	1	gene25295|K03943	gene25295|K03943	1	.	0	http://www.kegg.jp/pathway/map00190+K03943	no
Vasopressin-regulated water reabsorption	map04962	0	54	65	8885	1	1	-	.	0	.	0	http://www.kegg.jp/pathway/map04962+	no
Arachidonic acid metabolism	map00590	0	71	65	8868	1	1	-	.	0	.	0	http://www.kegg.jp/pathway/map00590+	no
Linoleic acid metabolism	map00591	0	35	65	8904	1	1	-	.	0	.	0	http://www.kegg.jp/pathway/map00591+	no
alpha-Linolenic acid metabolism	map00592	0	29	65	8910	1	1	-	.	0	.	0	http://www.kegg.jp/pathway/map00592+	no
Riboflavin metabolism	map00740	0	13	65	8926	1	1	-	.	0	.	0	http://www.kegg.jp/pathway/map00740+	no
Neuroactive ligand-receptor interaction	map04080	0	275	65	8664	1	1	-	.	0	.	0	http://www.kegg.jp/pathway/map04080+	no
Circadian entrainment	map04713	1	95	64	8844	0.503041	1	gene26499|K04962	.	0	gene26499|K04962	1	http://www.kegg.jp/pathway/map04713+K04962	no
Circadian rhythm	map04710	0	42	65	8897	1	1	-	.	0	.	0	http://www.kegg.jp/pathway/map04710+	no
Fatty acid biosynthesis	map00061	0	7	65	8932	1	1	-	.	0	.	0	http://www.kegg.jp/pathway/map00061+	no
Hematopoietic cell lineage	map04640	0	86	65	8853	1	1	-	.	0	.	0	http://www.kegg.jp/pathway/map04640+	no
Ascorbate and aldarate metabolism	map00053	0	33	65	8906	1	1	-	.	0	.	0	http://www.kegg.jp/pathway/map00053+	no
Galactose metabolism	map00052	0	31	65	8908	1	1	-	.	0	.	0	http://www.kegg.jp/pathway/map00052+	no
Peroxisome	map04146	2	84	63	8855	0.127723	1	gene22760|K01640;gene6565|K05676	.	0	gene22760|K01640;gene6565|K05676	2	http://www.kegg.jp/pathway/map04146+K01640+K05676	no
VEGF signaling pathway	map04370	1	54	64	8885	0.329472	1	gene20228|K02649	gene20228|K02649	1	.	0	http://www.kegg.jp/pathway/map04370+K02649	no
Amino sugar and nucleotide sugar metabolism	map00520	1	54	64	8885	0.329472	1	gene5695|K08678	gene5695|K08678	1	.	0	http://www.kegg.jp/pathway/map00520+K08678	no
Polyketide sugar unit biosynthesis	map00523	0	1	65	8938	1	1	-	.	0	.	0	http://www.kegg.jp/pathway/map00523+	no
Valine, leucine and isoleucine biosynthesis	map00290	0	3	65	8936	1	1	-	.	0	.	0	http://www.kegg.jp/pathway/map00290+	no
NOD-like receptor signaling pathway	map04621	0	56	65	8883	1	1	-	.	0	.	0	http://www.kegg.jp/pathway/map04621+	no
Vitamin B6 metabolism	map00750	0	11	65	8928	1	1	-	.	0	.	0	http://www.kegg.jp/pathway/map00750+	no
Retinol metabolism	map00830	0	71	65	8868	1	1	-	.	0	.	0	http://www.kegg.jp/pathway/map00830+	no
Proximal tubule bicarbonate reclamation	map04964	0	27	65	8912	1	1	-	.	0	.	0	http://www.kegg.jp/pathway/map04964+	no
Collecting duct acid secretion	map04966	0	28	65	8911	1	1	-	.	0	.	0	http://www.kegg.jp/pathway/map04966+	no
Endocrine and other factor-regulated calcium reabsorption	map04961	0	48	65	8891	1	1	-	.	0	.	0	http://www.kegg.jp/pathway/map04961+	no
RNA polymerase	map03020	0	30	65	8909	1	1	-	.	0	.	0	http://www.kegg.jp/pathway/map03020+	no
Basal transcription factors	map03022	1	58	64	8881	0.348745	1	gene26103|K03121	.	0	gene26103|K03121	1	http://www.kegg.jp/pathway/map03022+K03121	no
Sphingolipid metabolism	map00600	1	51	64	8888	0.31465	1	gene2919|K00720	gene2919|K00720	1	.	0	http://www.kegg.jp/pathway/map00600+K00720	no
Glycosphingolipid biosynthesis - lacto and neolacto series	map00601	1	27	64	8912	0.183862	1	gene1864|K03792	gene1864|K03792	1	.	0	http://www.kegg.jp/pathway/map00601+K03792	no
Tyrosine metabolism	map00350	0	43	65	8896	1	1	-	.	0	.	0	http://www.kegg.jp/pathway/map00350+	no
Glycosphingolipid biosynthesis - globo and isoglobo series	map00603	0	18	65	8921	1	1	-	.	0	.	0	http://www.kegg.jp/pathway/map00603+	no
Metabolic pathways	map01100	16	1399	49	7540	0.0409618	1	gene10329|K02578;gene14082|K01965;gene1864|K03792;gene19644|K00472;gene20113|K09680;gene20350|K00323;gene20660|K01109;gene21328|K13499;gene22086|K07151;gene22760|K01640;gene25166|K00710;gene25295|K03943;gene2919|K00720;gene3825|K05605;gene5607|K01899;gene5695|K08678	gene10329|K02578;gene14082|K01965;gene1864|K03792;gene19644|K00472;gene21328|K13499;gene22086|K07151;gene25166|K00710;gene25295|K03943;gene2919|K00720;gene5695|K08678	10	gene20113|K09680;gene20350|K00323;gene20660|K01109;gene22760|K01640;gene3825|K05605;gene5607|K01899	6	http://www.kegg.jp/pathway/map01100+K02578+K01965+K03792+K00472+K09680+K00323+K01109+K13499+K07151+K01640+K00710+K03943+K00720+K05605+K01899+K08678	no
Lysosome	map04142	0	135	65	8804	1	1	-	.	0	.	0	http://www.kegg.jp/pathway/map04142+	no

## Sheet: BB_F_H_WW_F_H
Name	Map	Count1	Count2	Count3	Count4	p	q	Gene_in_DE	Up_Gene	Up_Count	Down_Gene	Down_Count	Links	Result
Ubiquitin mediated proteolysis	map04120	9	186	67	8742	3.54622e-05	0.00968119	gene11258|K04706;gene11787|K10594;gene14244|K10608;gene14550|K10575;gene15992|K10597;gene16211|K10143;gene20272|K10570;gene26576|K10615;gene9791|K03355	gene14550|K10575;gene15992|K10597;gene20272|K10570;gene26576|K10615;gene9791|K03355	5	gene11258|K04706;gene11787|K10594;gene14244|K10608;gene16211|K10143	4	http://www.kegg.jp/pathway/map04120+K04706+K10594+K10608+K10575+K10597+K10143+K10570+K10615+K03355	yes
Endocytosis	map04144	7	211	69	8717	0.00234935	0.320686	gene13145|K12488;gene14585|K12480;gene24808|K12494;gene24933|K08291;gene27118|K12494;gene5189|K12186;gene82|K12491	gene13145|K12488;gene14585|K12480;gene82|K12491	3	gene24808|K12494;gene24933|K08291;gene27118|K12494;gene5189|K12186	4	http://www.kegg.jp/pathway/map04144+K12488+K12480+K12494+K08291+K12494+K12186+K12491	no
Insulin secretion	map04911	4	82	72	8846	0.00590401	0.537265	gene11122|K04943;gene13454|K15297;gene26499|K04962;gene7899|K16882	gene7899|K16882	1	gene11122|K04943;gene13454|K15297;gene26499|K04962	3	http://www.kegg.jp/pathway/map04911+K04943+K15297+K04962+K16882	no
Gap junction	map04540	4	90	72	8838	0.00806086	0.550154	gene11746|K03099;gene18997|K12318;gene22269|K04958;gene2928|K04289	gene11746|K03099;gene18997|K12318	2	gene22269|K04958;gene2928|K04289	2	http://www.kegg.jp/pathway/map04540+K03099+K12318+K04958+K04289	no
ABC transporters	map02010	1	86	75	8842	0.523371	1	gene26384|K05657	gene26384|K05657	1	.	0	http://www.kegg.jp/pathway/map02010+K05657	no
Tryptophan metabolism	map00380	0	52	76	8876	1	1	-	.	0	.	0	http://www.kegg.jp/pathway/map00380+	no
Aminoacyl-tRNA biosynthesis	map00970	0	49	76	8879	1	1	-	.	0	.	0	http://www.kegg.jp/pathway/map00970+	no
Steroid biosynthesis	map00100	0	18	76	8910	1	1	-	.	0	.	0	http://www.kegg.jp/pathway/map00100+	no
mTOR signaling pathway	map04150	1	88	75	8840	0.531461	1	gene2269|K00922	.	0	gene2269|K00922	1	http://www.kegg.jp/pathway/map04150+K00922	no
PI3K-Akt signaling pathway	map04151	4	372	72	8556	0.39255	1	gene11746|K03099;gene2269|K00922;gene2928|K04289;gene3640|K05121	gene11746|K03099	1	gene2269|K00922;gene2928|K04289;gene3640|K05121	3	http://www.kegg.jp/pathway/map04151+K03099+K00922+K04289+K05121	no
Mucin type O-glycan biosynthesis	map00512	1	34	75	8894	0.257136	1	gene25166|K00710	.	0	gene25166|K00710	1	http://www.kegg.jp/pathway/map00512+K00710	no
Axon guidance	map04360	1	136	75	8792	0.689689	1	gene15672|K07526	.	0	gene15672|K07526	1	http://www.kegg.jp/pathway/map04360+K07526	no
N-Glycan biosynthesis	map00510	1	62	75	8866	0.414843	1	gene1008|K01230	.	0	gene1008|K01230	1	http://www.kegg.jp/pathway/map00510+K01230	no
Other glycan degradation	map00511	0	28	76	8900	1	1	-	.	0	.	0	http://www.kegg.jp/pathway/map00511+	no
Circadian rhythm	map04710	0	42	76	8886	1	1	-	.	0	.	0	http://www.kegg.jp/pathway/map04710+	no
Carbon metabolism	map01200	1	120	75	8808	0.643915	1	gene14082|K01965	gene14082|K01965	1	.	0	http://www.kegg.jp/pathway/map01200+K01965	no
Circadian entrainment	map04713	3	93	73	8835	0.0472468	1	gene18997|K12318;gene22269|K04958;gene26499|K04962	gene18997|K12318	1	gene22269|K04958;gene26499|K04962	2	http://www.kegg.jp/pathway/map04713+K12318+K04958+K04962	no
Toll-like receptor signaling pathway	map04620	2	107	74	8821	0.234526	1	gene2269|K00922;gene6642|K05410	gene6642|K05410	1	gene2269|K00922	1	http://www.kegg.jp/pathway/map04620+K00922+K05410	no
NOD-like receptor signaling pathway	map04621	0	56	76	8872	1	1	-	.	0	.	0	http://www.kegg.jp/pathway/map04621+	no
RIG-I-like receptor signaling pathway	map04622	1	78	75	8850	0.489607	1	gene6642|K05410	gene6642|K05410	1	.	0	http://www.kegg.jp/pathway/map04622+K05410	no
Cytosolic DNA-sensing pathway	map04623	1	57	75	8871	0.389335	1	gene6642|K05410	gene6642|K05410	1	.	0	http://www.kegg.jp/pathway/map04623+K05410	no
Glycine, serine and threonine metabolism	map00260	0	50	76	8878	1	1	-	.	0	.	0	http://www.kegg.jp/pathway/map00260+	no
Vasopressin-regulated water reabsorption	map04962	2	52	74	8876	0.0759563	1	gene15234|K06027;gene18930|K10414	gene15234|K06027;gene18930|K10414	2	.	0	http://www.kegg.jp/pathway/map04962+K06027+K10414	no
Calcium signaling pathway	map04020	2	191	74	8737	0.487413	1	gene22269|K04958;gene26499|K04962	.	0	gene22269|K04958;gene26499|K04962	2	http://www.kegg.jp/pathway/map04020+K04958+K04962	no
Synthesis and degradation of ketone bodies	map00072	0	14	76	8914	1	1	-	.	0	.	0	http://www.kegg.jp/pathway/map00072+	no
Riboflavin metabolism	map00740	0	13	76	8915	1	1	-	.	0	.	0	http://www.kegg.jp/pathway/map00740+	no
Base excision repair	map03410	0	45	76	8883	1	1	-	.	0	.	0	http://www.kegg.jp/pathway/map03410+	no
Hippo signaling pathway	map04390	4	171	72	8757	0.0601758	1	gene11752|K16686;gene16409|K16681;gene2120|K12076;gene4356|K04671	gene11752|K16686;gene16409|K16681;gene2120|K12076	3	gene4356|K04671	1	http://www.kegg.jp/pathway/map04390+K16686+K16681+K12076+K04671	no
Hippo signaling pathway - fly	map04391	3	81	73	8847	0.033826	1	gene11752|K16686;gene16409|K16681;gene2120|K12076	gene11752|K16686;gene16409|K16681;gene2120|K12076	3	.	0	http://www.kegg.jp/pathway/map04391+K16686+K16681+K12076	no
Basal transcription factors	map03022	0	59	76	8869	1	1	-	.	0	.	0	http://www.kegg.jp/pathway/map03022+	no
RNA polymerase	map03020	0	30	76	8898	1	1	-	.	0	.	0	http://www.kegg.jp/pathway/map03020+	no
Influenza A	map05164	2	187	74	8741	0.476387	1	gene2269|K00922;gene6642|K05410	gene6642|K05410	1	gene2269|K00922	1	http://www.kegg.jp/pathway/map05164+K00922+K05410	no
Intestinal immune network for IgA production	map04672	0	42	76	8886	1	1	-	.	0	.	0	http://www.kegg.jp/pathway/map04672+	no
HTLV-I infection	map05166	3	305	73	8623	0.484736	1	gene2120|K12076;gene2269|K00922;gene9791|K03355	gene2120|K12076;gene9791|K03355	2	gene2269|K00922	1	http://www.kegg.jp/pathway/map05166+K12076+K00922+K03355	no
Asthma	map05310	0	23	76	8905	1	1	-	.	0	.	0	http://www.kegg.jp/pathway/map05310+	no
Wnt signaling pathway	map04310	2	152	74	8776	0.374471	1	gene15996|K04493;gene27199|K04508	.	0	gene15996|K04493;gene27199|K04508	2	http://www.kegg.jp/pathway/map04310+K04493+K04508	no
Autophagy	map04140	0	35	76	8893	1	1	-	.	0	.	0	http://www.kegg.jp/pathway/map04140+	no
Lysosome	map04142	0	135	76	8793	1	1	-	.	0	.	0	http://www.kegg.jp/pathway/map04142+	no
Phagosome	map04145	1	161	75	8767	0.749845	1	gene18930|K10414	gene18930|K10414	1	.	0	http://www.kegg.jp/pathway/map04145+K10414	no
Starch and sucrose metabolism	map00500	1	63	75	8865	0.419817	1	gene11702|K12317	.	0	gene11702|K12317	1	http://www.kegg.jp/pathway/map00500+K12317	no
Peroxisome	map04146	0	86	76	8842	1	1	-	.	0	.	0	http://www.kegg.jp/pathway/map04146+	no
Amyotrophic lateral sclerosis (ALS)	map05014	0	67	76	8861	1	1	-	.	0	.	0	http://www.kegg.jp/pathway/map05014+	no
GnRH signaling pathway	map04912	2	86	74	8842	0.169948	1	gene11746|K03099;gene22269|K04958	gene11746|K03099	1	gene22269|K04958	1	http://www.kegg.jp/pathway/map04912+K03099+K04958	no
Huntington's disease	map05016	3	269	73	8659	0.404363	1	gene22269|K04958;gene25295|K03943;gene26133|K04559	gene25295|K03943	1	gene22269|K04958;gene26133|K04559	2	http://www.kegg.jp/pathway/map05016+K04958+K03943+K04559	no
Biosynthesis of unsaturated fatty acids	map01040	0	25	76	8903	1	1	-	.	0	.	0	http://www.kegg.jp/pathway/map01040+	no
Alzheimer's disease	map05010	3	235	73	8693	0.325723	1	gene11826|K06704;gene22269|K04958;gene25295|K03943	gene11826|K06704;gene25295|K03943	2	gene22269|K04958	1	http://www.kegg.jp/pathway/map05010+K06704+K04958+K03943	no
Glycosphingolipid biosynthesis - ganglio series	map00604	0	17	76	8911	1	1	-	.	0	.	0	http://www.kegg.jp/pathway/map00604+	no
Parkinson's disease	map05012	2	203	74	8725	0.519629	1	gene14550|K10575;gene25295|K03943	gene14550|K10575;gene25295|K03943	2	.	0	http://www.kegg.jp/pathway/map05012+K10575+K03943	no
Hepatitis B	map05161	2	178	74	8750	0.451076	1	gene2269|K00922;gene6642|K05410	gene6642|K05410	1	gene2269|K00922	1	http://www.kegg.jp/pathway/map05161+K00922+K05410	no
SNARE interactions in vesicular transport	map04130	1	39	75	8889	0.288088	1	gene20844|K08486	gene20844|K08486	1	.	0	http://www.kegg.jp/pathway/map04130+K08486	no
Measles	map05162	2	137	74	8791	0.328414	1	gene2269|K00922;gene6642|K05410	gene6642|K05410	1	gene2269|K00922	1	http://www.kegg.jp/pathway/map05162+K00922+K05410	no
One carbon pool by folate	map00670	0	25	76	8903	1	1	-	.	0	.	0	http://www.kegg.jp/pathway/map00670+	no
Maturity onset diabetes of the young	map04950	0	22	76	8906	1	1	-	.	0	.	0	http://www.kegg.jp/pathway/map04950+	no
Cysteine and methionine metabolism	map00270	0	48	76	8880	1	1	-	.	0	.	0	http://www.kegg.jp/pathway/map00270+	no
Citrate cycle (TCA cycle)	map00020	0	39	76	8889	1	1	-	.	0	.	0	http://www.kegg.jp/pathway/map00020+	no
Glycosphingolipid biosynthesis - globo and isoglobo series	map00603	0	18	76	8910	1	1	-	.	0	.	0	http://www.kegg.jp/pathway/map00603+	no
RNA degradation	map03018	0	82	76	8846	1	1	-	.	0	.	0	http://www.kegg.jp/pathway/map03018+	no
Nucleotide excision repair	map03420	1	51	75	8877	0.357274	1	gene20272|K10570	gene20272|K10570	1	.	0	http://www.kegg.jp/pathway/map03420+K10570	no
RNA transport	map03013	0	269	76	8659	1	1	-	.	0	.	0	http://www.kegg.jp/pathway/map03013+	no
Ribosome	map03010	0	772	76	8156	1	1	-	.	0	.	0	http://www.kegg.jp/pathway/map03010+	no
Regulation of actin cytoskeleton	map04810	3	243	73	8685	0.344323	1	gene11746|K03099;gene2269|K00922;gene28365|K05741	gene11746|K03099;gene28365|K05741	2	gene2269|K00922	1	http://www.kegg.jp/pathway/map04810+K03099+K00922+K05741	no
Staphylococcus aureus infection	map05150	0	54	76	8874	1	1	-	.	0	.	0	http://www.kegg.jp/pathway/map05150+	no
Pantothenate and CoA biosynthesis	map00770	0	18	76	8910	1	1	-	.	0	.	0	http://www.kegg.jp/pathway/map00770+	no
Alanine, aspartate and glutamate metabolism	map00250	0	42	76	8886	1	1	-	.	0	.	0	http://www.kegg.jp/pathway/map00250+	no
Tight junction	map04530	0	141	76	8787	1	1	-	.	0	.	0	http://www.kegg.jp/pathway/map04530+	no
Hedgehog signaling pathway	map04340	0	55	76	8873	1	1	-	.	0	.	0	http://www.kegg.jp/pathway/map04340+	no
Long-term depression	map04730	2	55	74	8873	0.0833753	1	gene18997|K12318;gene22269|K04958	gene18997|K12318	1	gene22269|K04958	1	http://www.kegg.jp/pathway/map04730+K12318+K04958	no
Protein processing in endoplasmic reticulum	map04141	3	220	73	8708	0.290914	1	gene1008|K01230;gene14550|K10575;gene15992|K10597	gene14550|K10575;gene15992|K10597	2	gene1008|K01230	1	http://www.kegg.jp/pathway/map04141+K01230+K10575+K10597	no
Rheumatoid arthritis	map05323	1	91	75	8837	0.543344	1	gene3640|K05121	.	0	gene3640|K05121	1	http://www.kegg.jp/pathway/map05323+K05121	no
Autoimmune thyroid disease	map05320	0	46	76	8882	1	1	-	.	0	.	0	http://www.kegg.jp/pathway/map05320+	no
Inflammatory bowel disease (IBD)	map05321	0	55	76	8873	1	1	-	.	0	.	0	http://www.kegg.jp/pathway/map05321+	no
GABAergic synapse	map04727	2	86	74	8842	0.169948	1	gene15234|K06027;gene21326|K05186	gene15234|K06027;gene21326|K05186	2	.	0	http://www.kegg.jp/pathway/map04727+K06027+K05186	no
Glycosaminoglycan degradation	map00531	0	22	76	8906	1	1	-	.	0	.	0	http://www.kegg.jp/pathway/map00531+	no
Hypertrophic cardiomyopathy (HCM)	map05410	1	84	75	8844	0.515143	1	gene26499|K04962	.	0	gene26499|K04962	1	http://www.kegg.jp/pathway/map05410+K04962	no
Phenylalanine metabolism	map00360	0	28	76	8900	1	1	-	.	0	.	0	http://www.kegg.jp/pathway/map00360+	no
Arrhythmogenic right ventricular cardiomyopathy (ARVC)	map05412	1	70	75	8858	0.453486	1	gene26499|K04962	.	0	gene26499|K04962	1	http://www.kegg.jp/pathway/map05412+K04962	no
Dilated cardiomyopathy	map05414	1	86	75	8842	0.523371	1	gene26499|K04962	.	0	gene26499|K04962	1	http://www.kegg.jp/pathway/map05414+K04962	no
Glycosaminoglycan biosynthesis - chondroitin sulfate / dermatan sulfate	map00532	1	20	75	8908	0.16323	1	gene26520|K00746	.	0	gene26520|K00746	1	http://www.kegg.jp/pathway/map00532+K00746	no
Viral myocarditis	map05416	0	75	76	8853	1	1	-	.	0	.	0	http://www.kegg.jp/pathway/map05416+	no
Jak-STAT signaling pathway	map04630	3	167	73	8761	0.173054	1	gene11258|K04706;gene11746|K03099;gene2269|K00922	gene11746|K03099	1	gene11258|K04706;gene2269|K00922	2	http://www.kegg.jp/pathway/map04630+K04706+K03099+K00922	no
D-Glutamine and D-glutamate metabolism	map00471	0	6	76	8922	1	1	-	.	0	.	0	http://www.kegg.jp/pathway/map00471+	no
Synaptic vesicle cycle	map04721	3	69	73	8859	0.0227375	1	gene15234|K06027;gene20844|K08486;gene6191|K15290	gene15234|K06027;gene20844|K08486;gene6191|K15290	3	.	0	http://www.kegg.jp/pathway/map04721+K06027+K08486+K15290	no
Estrogen signaling pathway	map04915	3	96	73	8832	0.0509564	1	gene11746|K03099;gene22269|K04958;gene2269|K00922	gene11746|K03099	1	gene22269|K04958;gene2269|K00922	2	http://www.kegg.jp/pathway/map04915+K03099+K04958+K00922	no
Nicotine addiction	map05033	1	40	75	8888	0.294123	1	gene21326|K05186	gene21326|K05186	1	.	0	http://www.kegg.jp/pathway/map05033+K05186	no
Sulfur relay system	map04122	0	14	76	8914	1	1	-	.	0	.	0	http://www.kegg.jp/pathway/map04122+	no
Propanoate metabolism	map00640	1	36	75	8892	0.269673	1	gene14082|K01965	gene14082|K01965	1	.	0	http://www.kegg.jp/pathway/map00640+K01965	no
Lysine degradation	map00310	1	85	75	8843	0.519274	1	gene4955|K11420	.	0	gene4955|K11420	1	http://www.kegg.jp/pathway/map00310+K11420	no
Cocaine addiction	map05030	0	51	76	8877	1	1	-	.	0	.	0	http://www.kegg.jp/pathway/map05030+	no
Pentose and glucuronate interconversions	map00040	0	42	76	8886	1	1	-	.	0	.	0	http://www.kegg.jp/pathway/map00040+	no
Amphetamine addiction	map05031	0	71	76	8857	1	1	-	.	0	.	0	http://www.kegg.jp/pathway/map05031+	no
Phenylalanine, tyrosine and tryptophan biosynthesis	map00400	0	6	76	8922	1	1	-	.	0	.	0	http://www.kegg.jp/pathway/map00400+	no
Circadian rhythm - fly	map04711	0	10	76	8918	1	1	-	.	0	.	0	http://www.kegg.jp/pathway/map04711+	no
Ribosome biogenesis in eukaryotes	map03008	1	122	75	8806	0.649982	1	gene12593|K14572	.	0	gene12593|K14572	1	http://www.kegg.jp/pathway/map03008+K14572	no
Other types of O-glycan biosynthesis	map00514	0	36	76	8892	1	1	-	.	0	.	0	http://www.kegg.jp/pathway/map00514+	no
Glutathione metabolism	map00480	0	64	76	8864	1	1	-	.	0	.	0	http://www.kegg.jp/pathway/map00480+	no
Selenocompound metabolism	map00450	1	26	75	8902	0.204829	1	gene6946|K00384	gene6946|K00384	1	.	0	http://www.kegg.jp/pathway/map00450+K00384	no
Nicotinate and nicotinamide metabolism	map00760	0	33	76	8895	1	1	-	.	0	.	0	http://www.kegg.jp/pathway/map00760+	no
TNF signaling pathway	map04668	1	113	75	8815	0.62185	1	gene2269|K00922	.	0	gene2269|K00922	1	http://www.kegg.jp/pathway/map04668+K00922	no
Cholinergic synapse	map04725	2	107	74	8821	0.234526	1	gene22269|K04958;gene2269|K00922	.	0	gene22269|K04958;gene2269|K00922	2	http://www.kegg.jp/pathway/map04725+K04958+K00922	no
Glutamatergic synapse	map04724	2	112	74	8816	0.250178	1	gene19179|K05204;gene22269|K04958	.	0	gene19179|K05204;gene22269|K04958	2	http://www.kegg.jp/pathway/map04724+K05204+K04958	no
Alcoholism	map05034	1	176	75	8752	0.78025	1	gene11746|K03099	gene11746|K03099	1	.	0	http://www.kegg.jp/pathway/map05034+K03099	no
Serotonergic synapse	map04726	2	110	74	8818	0.243911	1	gene11122|K04943;gene22269|K04958	.	0	gene11122|K04943;gene22269|K04958	2	http://www.kegg.jp/pathway/map04726+K04943+K04958	no
Morphine addiction	map05032	2	76	74	8852	0.140451	1	gene21326|K05186;gene24933|K08291	gene21326|K05186	1	gene24933|K08291	1	http://www.kegg.jp/pathway/map05032+K05186+K08291	no
Long-term potentiation	map04720	1	70	75	8858	0.453486	1	gene22269|K04958	.	0	gene22269|K04958	1	http://www.kegg.jp/pathway/map04720+K04958	no
Retrograde endocannabinoid signaling	map04723	2	99	74	8829	0.209638	1	gene21326|K05186;gene22269|K04958	gene21326|K05186	1	gene22269|K04958	1	http://www.kegg.jp/pathway/map04723+K05186+K04958	no
Neurotrophin signaling pathway	map04722	2	123	74	8805	0.284695	1	gene11746|K03099;gene2269|K00922	gene11746|K03099	1	gene2269|K00922	1	http://www.kegg.jp/pathway/map04722+K03099+K00922	no
Chemical carcinogenesis	map05204	0	86	76	8842	1	1	-	.	0	.	0	http://www.kegg.jp/pathway/map05204+	no
Allograft rejection	map05330	0	37	76	8891	1	1	-	.	0	.	0	http://www.kegg.jp/pathway/map05330+	no
Graft-versus-host disease	map05332	0	32	76	8896	1	1	-	.	0	.	0	http://www.kegg.jp/pathway/map05332+	no
Dopaminergic synapse	map04728	1	137	75	8791	0.692349	1	gene22269|K04958	.	0	gene22269|K04958	1	http://www.kegg.jp/pathway/map04728+K04958	no
Adherens junction	map04520	1	79	75	8849	0.493953	1	gene6572|K05694	gene6572|K05694	1	.	0	http://www.kegg.jp/pathway/map04520+K05694	no
Legionellosis	map05134	0	113	76	8815	1	1	-	.	0	.	0	http://www.kegg.jp/pathway/map05134+	no
Pertussis	map05133	0	86	76	8842	1	1	-	.	0	.	0	http://www.kegg.jp/pathway/map05133+	no
Salmonella infection	map05132	1	105	75	8823	0.594978	1	gene18930|K10414	gene18930|K10414	1	.	0	http://www.kegg.jp/pathway/map05132+K10414	no
Pyrimidine metabolism	map00240	3	107	73	8821	0.0657222	1	gene15899|K00940;gene27269|K01937;gene6946|K00384	gene27269|K01937;gene6946|K00384	2	gene15899|K00940	1	http://www.kegg.jp/pathway/map00240+K00940+K01937+K00384	no
Glycolysis / Gluconeogenesis	map00010	0	86	76	8842	1	1	-	.	0	.	0	http://www.kegg.jp/pathway/map00010+	no
Notch signaling pathway	map04330	0	59	76	8869	1	1	-	.	0	.	0	http://www.kegg.jp/pathway/map04330+	no
Glycerophospholipid metabolism	map00564	0	99	76	8829	1	1	-	.	0	.	0	http://www.kegg.jp/pathway/map00564+	no
Glycosylphosphatidylinositol (GPI)-anchor biosynthesis	map00563	0	32	76	8896	1	1	-	.	0	.	0	http://www.kegg.jp/pathway/map00563+	no
Chagas disease (American trypanosomiasis)	map05142	1	121	75	8807	0.646961	1	gene2269|K00922	.	0	gene2269|K00922	1	http://www.kegg.jp/pathway/map05142+K00922	no
Glycerolipid metabolism	map00561	0	58	76	8870	1	1	-	.	0	.	0	http://www.kegg.jp/pathway/map00561+	no
Butanoate metabolism	map00650	1	36	75	8892	0.269673	1	gene11747|K00109	gene11747|K00109	1	.	0	http://www.kegg.jp/pathway/map00650+K00109	no
Lysine biosynthesis	map00300	0	4	76	8924	1	1	-	.	0	.	0	http://www.kegg.jp/pathway/map00300+	no
Oocyte meiosis	map04114	2	146	74	8782	0.356177	1	gene22269|K04958;gene9791|K03355	gene9791|K03355	1	gene22269|K04958	1	http://www.kegg.jp/pathway/map04114+K04958+K03355	no
p53 signaling pathway	map04115	1	105	75	8823	0.594978	1	gene16211|K10143	.	0	gene16211|K10143	1	http://www.kegg.jp/pathway/map04115+K10143	no
Steroid hormone biosynthesis	map00140	0	62	76	8866	1	1	-	.	0	.	0	http://www.kegg.jp/pathway/map00140+	no
Cell cycle	map04110	2	168	74	8760	0.422184	1	gene2571|K06671;gene9791|K03355	gene2571|K06671;gene9791|K03355	2	.	0	http://www.kegg.jp/pathway/map04110+K06671+K03355	no
Collecting duct acid secretion	map04966	0	28	76	8900	1	1	-	.	0	.	0	http://www.kegg.jp/pathway/map04966+	no
mRNA surveillance pathway	map03015	3	144	73	8784	0.127337	1	gene10688|K14405;gene19745|K14408;gene24216|K14398	gene19745|K14408	1	gene10688|K14405;gene24216|K14398	2	http://www.kegg.jp/pathway/map03015+K14405+K14408+K14398	no
Type II diabetes mellitus	map04930	1	44	75	8884	0.317766	1	gene2269|K00922	.	0	gene2269|K00922	1	http://www.kegg.jp/pathway/map04930+K00922	no
Proximal tubule bicarbonate reclamation	map04964	0	27	76	8901	1	1	-	.	0	.	0	http://www.kegg.jp/pathway/map04964+	no
Prion diseases	map05020	1	33	75	8895	0.250788	1	gene19061|K06491	.	0	gene19061|K06491	1	http://www.kegg.jp/pathway/map05020+K06491	no
Fanconi anemia pathway	map03460	0	54	76	8874	1	1	-	.	0	.	0	http://www.kegg.jp/pathway/map03460+	no
ECM-receptor interaction	map04512	0	82	76	8846	1	1	-	.	0	.	0	http://www.kegg.jp/pathway/map04512+	no
Fatty acid degradation	map00071	0	45	76	8883	1	1	-	.	0	.	0	http://www.kegg.jp/pathway/map00071+	no
Focal adhesion	map04510	3	197	73	8731	0.238329	1	gene11746|K03099;gene21699|K13709;gene2269|K00922	gene11746|K03099	1	gene21699|K13709;gene2269|K00922	2	http://www.kegg.jp/pathway/map04510+K03099+K13709+K00922	no
Protein export	map03060	1	21	75	8907	0.170309	1	gene10714|K03108	.	0	gene10714|K03108	1	http://www.kegg.jp/pathway/map03060+K03108	no
Non-small cell lung cancer	map05223	2	55	74	8873	0.0833753	1	gene11746|K03099;gene2269|K00922	gene11746|K03099	1	gene2269|K00922	1	http://www.kegg.jp/pathway/map05223+K03099+K00922	no
Small cell lung cancer	map05222	1	119	75	8809	0.640842	1	gene2269|K00922	.	0	gene2269|K00922	1	http://www.kegg.jp/pathway/map05222+K00922	no
Cell adhesion molecules (CAMs)	map04514	1	132	75	8796	0.678822	1	gene19061|K06491	.	0	gene19061|K06491	1	http://www.kegg.jp/pathway/map04514+K06491	no
Chronic myeloid leukemia	map05220	2	79	74	8849	0.14918	1	gene11746|K03099;gene2269|K00922	gene11746|K03099	1	gene2269|K00922	1	http://www.kegg.jp/pathway/map05220+K03099+K00922	no
Folate biosynthesis	map00790	0	14	76	8914	1	1	-	.	0	.	0	http://www.kegg.jp/pathway/map00790+	no
Complement and coagulation cascades	map04610	0	79	76	8849	1	1	-	.	0	.	0	http://www.kegg.jp/pathway/map04610+	no
Bacterial invasion of epithelial cells	map05100	1	93	75	8835	0.551099	1	gene2269|K00922	.	0	gene2269|K00922	1	http://www.kegg.jp/pathway/map05100+K00922	no
Antigen processing and presentation	map04612	1	76	75	8852	0.480804	1	gene9734|K09489	gene9734|K09489	1	.	0	http://www.kegg.jp/pathway/map04612+K09489	no
Renin-angiotensin system	map04614	0	18	76	8910	1	1	-	.	0	.	0	http://www.kegg.jp/pathway/map04614+	no
Dorso-ventral axis formation	map04320	1	32	75	8896	0.244387	1	gene11746|K03099	gene11746|K03099	1	.	0	http://www.kegg.jp/pathway/map04320+K03099	no
Tuberculosis	map05152	0	201	76	8727	1	1	-	.	0	.	0	http://www.kegg.jp/pathway/map05152+	no
Primary immunodeficiency	map05340	0	34	76	8894	1	1	-	.	0	.	0	http://www.kegg.jp/pathway/map05340+	no
Ether lipid metabolism	map00565	0	47	76	8881	1	1	-	.	0	.	0	http://www.kegg.jp/pathway/map00565+	no
Fc epsilon RI signaling pathway	map04664	2	65	74	8863	0.109555	1	gene11746|K03099;gene2269|K00922	gene11746|K03099	1	gene2269|K00922	1	http://www.kegg.jp/pathway/map04664+K03099+K00922	no
Fc gamma R-mediated phagocytosis	map04666	2	104	74	8824	0.225165	1	gene13145|K12488;gene2269|K00922	gene13145|K12488	1	gene2269|K00922	1	http://www.kegg.jp/pathway/map04666+K12488+K00922	no
T cell receptor signaling pathway	map04660	3	99	73	8829	0.054804	1	gene11746|K03099;gene2120|K12076;gene2269|K00922	gene11746|K03099;gene2120|K12076	2	gene2269|K00922	1	http://www.kegg.jp/pathway/map04660+K03099+K12076+K00922	no
B cell receptor signaling pathway	map04662	2	68	74	8860	0.117788	1	gene11746|K03099;gene2269|K00922	gene11746|K03099	1	gene2269|K00922	1	http://www.kegg.jp/pathway/map04662+K03099+K00922	no
Ubiquinone and other terpenoid-quinone biosynthesis	map00130	1	11	75	8917	0.0967724	1	gene10921|K06125	.	0	gene10921|K06125	1	http://www.kegg.jp/pathway/map00130+K06125	no
TGF-beta signaling pathway	map04350	1	87	75	8841	0.527433	1	gene4356|K04671	.	0	gene4356|K04671	1	http://www.kegg.jp/pathway/map04350+K04671	no
Arginine and proline metabolism	map00330	0	75	76	8853	1	1	-	.	0	.	0	http://www.kegg.jp/pathway/map00330+	no
Inositol phosphate metabolism	map00562	1	61	75	8867	0.409827	1	gene2269|K00922	.	0	gene2269|K00922	1	http://www.kegg.jp/pathway/map00562+K00922	no
Systemic lupus erythematosus	map05322	0	128	76	8800	1	1	-	.	0	.	0	http://www.kegg.jp/pathway/map05322+	no
Pyruvate metabolism	map00620	0	50	76	8878	1	1	-	.	0	.	0	http://www.kegg.jp/pathway/map00620+	no
Histidine metabolism	map00340	0	25	76	8903	1	1	-	.	0	.	0	http://www.kegg.jp/pathway/map00340+	no
Retinol metabolism	map00830	0	71	76	8857	1	1	-	.	0	.	0	http://www.kegg.jp/pathway/map00830+	no
Adipocytokine signaling pathway	map04920	0	72	76	8856	1	1	-	.	0	.	0	http://www.kegg.jp/pathway/map04920+	no
MAPK signaling pathway - fly	map04013	1	17	75	8911	0.141632	1	gene11746|K03099	gene11746|K03099	1	.	0	http://www.kegg.jp/pathway/map04013+K03099	no
Non-homologous end-joining	map03450	1	14	75	8914	0.119484	1	gene4451|K10885	gene4451|K10885	1	.	0	http://www.kegg.jp/pathway/map03450+K10885	no
Bladder cancer	map05219	0	42	76	8886	1	1	-	.	0	.	0	http://www.kegg.jp/pathway/map05219+	no
ErbB signaling pathway	map04012	2	80	74	8848	0.152114	1	gene11746|K03099;gene2269|K00922	gene11746|K03099	1	gene2269|K00922	1	http://www.kegg.jp/pathway/map04012+K03099+K00922	no
Pancreatic cancer	map05212	1	79	75	8849	0.493953	1	gene2269|K00922	.	0	gene2269|K00922	1	http://www.kegg.jp/pathway/map05212+K00922	no
Endometrial cancer	map05213	2	55	74	8873	0.0833753	1	gene11746|K03099;gene2269|K00922	gene11746|K03099	1	gene2269|K00922	1	http://www.kegg.jp/pathway/map05213+K03099+K00922	no
Colorectal cancer	map05210	1	88	75	8840	0.531461	1	gene2269|K00922	.	0	gene2269|K00922	1	http://www.kegg.jp/pathway/map05210+K00922	no
Renal cell carcinoma	map05211	2	75	74	8853	0.137567	1	gene11746|K03099;gene2269|K00922	gene11746|K03099	1	gene2269|K00922	1	http://www.kegg.jp/pathway/map05211+K03099+K00922	no
Thyroid cancer	map05216	0	36	76	8892	1	1	-	.	0	.	0	http://www.kegg.jp/pathway/map05216+	no
Basal cell carcinoma	map05217	0	58	76	8870	1	1	-	.	0	.	0	http://www.kegg.jp/pathway/map05217+	no
Glioma	map05214	2	62	74	8866	0.101486	1	gene11746|K03099;gene2269|K00922	gene11746|K03099	1	gene2269|K00922	1	http://www.kegg.jp/pathway/map05214+K03099+K00922	no
Olfactory transduction	map04740	0	1246	76	7682	1	1	-	.	0	.	0	http://www.kegg.jp/pathway/map04740+	no
Chemokine signaling pathway	map04062	3	179	73	8749	0.198548	1	gene11746|K03099;gene2269|K00922;gene24933|K08291	gene11746|K03099	1	gene2269|K00922;gene24933|K08291	2	http://www.kegg.jp/pathway/map04062+K03099+K00922+K08291	no
Pentose phosphate pathway	map00030	1	38	75	8890	0.282001	1	gene5473|K00852	.	0	gene5473|K00852	1	http://www.kegg.jp/pathway/map00030+K00852	no
Cytokine-cytokine receptor interaction	map04060	1	224	75	8704	0.855062	1	gene4356|K04671	.	0	gene4356|K04671	1	http://www.kegg.jp/pathway/map04060+K04671	no
Carbohydrate digestion and absorption	map04973	1	46	75	8882	0.329292	1	gene2269|K00922	.	0	gene2269|K00922	1	http://www.kegg.jp/pathway/map04973+K00922	no
HIF-1 signaling pathway	map04066	3	137	73	8791	0.114426	1	gene2269|K00922;gene2592|K14736;gene3640|K05121	.	0	gene2269|K00922;gene2592|K14736;gene3640|K05121	3	http://www.kegg.jp/pathway/map04066+K00922+K14736+K05121	no
Apoptosis	map04210	1	104	75	8824	0.591489	1	gene2269|K00922	.	0	gene2269|K00922	1	http://www.kegg.jp/pathway/map04210+K00922	no
NF-kappa B signaling pathway	map04064	0	94	76	8834	1	1	-	.	0	.	0	http://www.kegg.jp/pathway/map04064+	no
Lipoic acid metabolism	map00785	0	3	76	8925	1	1	-	.	0	.	0	http://www.kegg.jp/pathway/map00785+	no
Biotin metabolism	map00780	0	4	76	8924	1	1	-	.	0	.	0	http://www.kegg.jp/pathway/map00780+	no
Melanogenesis	map04916	0	103	76	8825	1	1	-	.	0	.	0	http://www.kegg.jp/pathway/map04916+	no
Prolactin signaling pathway	map04917	2	74	74	8854	0.134697	1	gene11746|K03099;gene2269|K00922	gene11746|K03099	1	gene2269|K00922	1	http://www.kegg.jp/pathway/map04917+K03099+K00922	no
Progesterone-mediated oocyte maturation	map04914	2	105	74	8823	0.228282	1	gene2269|K00922;gene9791|K03355	gene9791|K03355	1	gene2269|K00922	1	http://www.kegg.jp/pathway/map04914+K00922+K03355	no
Leukocyte transendothelial migration	map04670	2	124	74	8804	0.287831	1	gene21699|K13709;gene2269|K00922	.	0	gene21699|K13709;gene2269|K00922	2	http://www.kegg.jp/pathway/map04670+K13709+K00922	no
Hepatitis C	map05160	4	142	72	8786	0.0346588	1	gene11258|K04706;gene11746|K03099;gene2269|K00922;gene6642|K05410	gene11746|K03099;gene6642|K05410	2	gene11258|K04706;gene2269|K00922	2	http://www.kegg.jp/pathway/map05160+K04706+K03099+K00922+K05410	no
Ovarian steroidogenesis	map04913	0	55	76	8873	1	1	-	.	0	.	0	http://www.kegg.jp/pathway/map04913+	no
Insulin signaling pathway	map04910	2	167	74	8761	0.419253	1	gene11746|K03099;gene2269|K00922	gene11746|K03099	1	gene2269|K00922	1	http://www.kegg.jp/pathway/map04910+K03099+K00922	no
Glycosaminoglycan biosynthesis - heparan sulfate / heparin	map00534	0	24	76	8904	1	1	-	.	0	.	0	http://www.kegg.jp/pathway/map00534+	no
Acute myeloid leukemia	map05221	2	60	74	8868	0.0962045	1	gene11746|K03099;gene2269|K00922	gene11746|K03099	1	gene2269|K00922	1	http://www.kegg.jp/pathway/map05221+K03099+K00922	no
Herpes simplex infection	map05168	1	261	75	8667	0.895002	1	gene6642|K05410	gene6642|K05410	1	.	0	http://www.kegg.jp/pathway/map05168+K05410	no
Epstein-Barr virus infection	map05169	3	217	73	8711	0.283984	1	gene2269|K00922;gene3388|K03030;gene6642|K05410	gene6642|K05410	1	gene2269|K00922;gene3388|K03030	2	http://www.kegg.jp/pathway/map05169+K00922+K03030+K05410	no
Thyroid hormone synthesis	map04918	1	69	75	8859	0.448797	1	gene22269|K04958	.	0	gene22269|K04958	1	http://www.kegg.jp/pathway/map04918+K04958	no
Glycosaminoglycan biosynthesis - keratan sulfate	map00533	0	16	76	8912	1	1	-	.	0	.	0	http://www.kegg.jp/pathway/map00533+	no
Valine, leucine and isoleucine biosynthesis	map00290	0	3	76	8925	1	1	-	.	0	.	0	http://www.kegg.jp/pathway/map00290+	no
Amoebiasis	map05146	1	102	75	8826	0.584422	1	gene2269|K00922	.	0	gene2269|K00922	1	http://www.kegg.jp/pathway/map05146+K00922	no
Glyoxylate and dicarboxylate metabolism	map00630	1	33	75	8895	0.250788	1	gene14082|K01965	gene14082|K01965	1	.	0	http://www.kegg.jp/pathway/map00630+K01965	no
Proteasome	map03050	1	52	75	8876	0.362731	1	gene3388|K03030	.	0	gene3388|K03030	1	http://www.kegg.jp/pathway/map03050+K03030	no
Sulfur metabolism	map00920	0	16	76	8912	1	1	-	.	0	.	0	http://www.kegg.jp/pathway/map00920+	no
Homologous recombination	map03440	0	30	76	8898	1	1	-	.	0	.	0	http://www.kegg.jp/pathway/map03440+	no
beta-Alanine metabolism	map00410	0	40	76	8888	1	1	-	.	0	.	0	http://www.kegg.jp/pathway/map00410+	no
Pathways in cancer	map05200	2	380	74	8548	0.839262	1	gene11746|K03099;gene2269|K00922	gene11746|K03099	1	gene2269|K00922	1	http://www.kegg.jp/pathway/map05200+K03099+K00922	no
Viral carcinogenesis	map05203	2	246	74	8682	0.623777	1	gene2120|K12076;gene2269|K00922	gene2120|K12076	1	gene2269|K00922	1	http://www.kegg.jp/pathway/map05203+K12076+K00922	no
Transcriptional misregulation in cancer	map05202	2	175	74	8753	0.44249	1	gene24095|K09436;gene27477|K11447	.	0	gene24095|K09436;gene27477|K11447	2	http://www.kegg.jp/pathway/map05202+K09436+K11447	no
Proteoglycans in cancer	map05205	3	248	73	8680	0.355935	1	gene11746|K03099;gene22269|K04958;gene2269|K00922	gene11746|K03099	1	gene22269|K04958;gene2269|K00922	2	http://www.kegg.jp/pathway/map05205+K03099+K04958+K00922	no
Melanoma	map05218	1	69	75	8859	0.448797	1	gene2269|K00922	.	0	gene2269|K00922	1	http://www.kegg.jp/pathway/map05218+K00922	no
Natural killer cell mediated cytotoxicity	map04650	2	130	74	8798	0.306614	1	gene11746|K03099;gene2269|K00922	gene11746|K03099	1	gene2269|K00922	1	http://www.kegg.jp/pathway/map04650+K03099+K00922	no
Cardiac muscle contraction	map04260	1	92	75	8836	0.547238	1	gene26499|K04962	.	0	gene26499|K04962	1	http://www.kegg.jp/pathway/map04260+K04962	no
Phosphatidylinositol signaling system	map04070	2	80	74	8848	0.152114	1	gene22269|K04958;gene2269|K00922	.	0	gene22269|K04958;gene2269|K00922	2	http://www.kegg.jp/pathway/map04070+K04958+K00922	no
Taurine and hypotaurine metabolism	map00430	0	11	76	8917	1	1	-	.	0	.	0	http://www.kegg.jp/pathway/map00430+	no
Primary bile acid biosynthesis	map00120	0	15	76	8913	1	1	-	.	0	.	0	http://www.kegg.jp/pathway/map00120+	no
PPAR signaling pathway	map03320	0	69	76	8859	1	1	-	.	0	.	0	http://www.kegg.jp/pathway/map03320+	no
Caffeine metabolism	map00232	0	4	76	8924	1	1	-	.	0	.	0	http://www.kegg.jp/pathway/map00232+	no
Purine metabolism	map00230	2	183	74	8745	0.465222	1	gene15899|K00940;gene18997|K12318	gene18997|K12318	1	gene15899|K00940	1	http://www.kegg.jp/pathway/map00230+K00940+K12318	no
Ascorbate and aldarate metabolism	map00053	0	33	76	8895	1	1	-	.	0	.	0	http://www.kegg.jp/pathway/map00053+	no
Galactose metabolism	map00052	1	30	75	8898	0.231422	1	gene11702|K12317	.	0	gene11702|K12317	1	http://www.kegg.jp/pathway/map00052+K12317	no
Valine, leucine and isoleucine degradation	map00280	1	55	75	8873	0.378828	1	gene14082|K01965	gene14082|K01965	1	.	0	http://www.kegg.jp/pathway/map00280+K01965	no
D-Arginine and D-ornithine metabolism	map00472	0	1	76	8927	1	1	-	.	0	.	0	http://www.kegg.jp/pathway/map00472+	no
Tyrosine metabolism	map00350	0	43	76	8885	1	1	-	.	0	.	0	http://www.kegg.jp/pathway/map00350+	no
Aldosterone-regulated sodium reabsorption	map04960	1	40	75	8888	0.294123	1	gene2269|K00922	.	0	gene2269|K00922	1	http://www.kegg.jp/pathway/map04960+K00922	no
Amino sugar and nucleotide sugar metabolism	map00520	0	55	76	8873	1	1	-	.	0	.	0	http://www.kegg.jp/pathway/map00520+	no
Hematopoietic cell lineage	map04640	0	86	76	8842	1	1	-	.	0	.	0	http://www.kegg.jp/pathway/map04640+	no
Neomycin, kanamycin and gentamicin biosynthesis	map00524	0	6	76	8922	1	1	-	.	0	.	0	http://www.kegg.jp/pathway/map00524+	no
Spliceosome	map03040	0	246	76	8682	1	1	-	.	0	.	0	http://www.kegg.jp/pathway/map03040+	no
Endocrine and other factor-regulated calcium reabsorption	map04961	0	48	76	8880	1	1	-	.	0	.	0	http://www.kegg.jp/pathway/map04961+	no
Nitrogen metabolism	map00910	0	31	76	8897	1	1	-	.	0	.	0	http://www.kegg.jp/pathway/map00910+	no
Phototransduction - fly	map04745	1	27	75	8901	0.211561	1	gene22269|K04958	.	0	gene22269|K04958	1	http://www.kegg.jp/pathway/map04745+K04958	no
Sphingolipid metabolism	map00600	1	51	75	8877	0.357274	1	gene2919|K00720	gene2919|K00720	1	.	0	http://www.kegg.jp/pathway/map00600+K00720	no
Glycosphingolipid biosynthesis - lacto and neolacto series	map00601	0	28	76	8900	1	1	-	.	0	.	0	http://www.kegg.jp/pathway/map00601+	no
Metabolism of xenobiotics by cytochrome P450	map00980	0	90	76	8838	1	1	-	.	0	.	0	http://www.kegg.jp/pathway/map00980+	no
Drug metabolism - other enzymes	map00983	0	54	76	8874	1	1	-	.	0	.	0	http://www.kegg.jp/pathway/map00983+	no
Drug metabolism - cytochrome P450	map00982	0	80	76	8848	1	1	-	.	0	.	0	http://www.kegg.jp/pathway/map00982+	no
Metabolic pathways	map01100	10	1405	66	7523	0.776021	1	gene1008|K01230;gene10921|K06125;gene11702|K12317;gene14082|K01965;gene15899|K00940;gene25166|K00710;gene25295|K03943;gene26520|K00746;gene27269|K01937;gene2919|K00720	gene14082|K01965;gene25295|K03943;gene27269|K01937;gene2919|K00720	4	gene1008|K01230;gene10921|K06125;gene11702|K12317;gene15899|K00940;gene25166|K00710;gene26520|K00746	6	http://www.kegg.jp/pathway/map01100+K01230+K06125+K12317+K01965+K00940+K00710+K03943+K00746+K01937+K00720	no
Oxidative phosphorylation	map00190	1	197	75	8731	0.816779	1	gene25295|K03943	gene25295|K03943	1	.	0	http://www.kegg.jp/pathway/map00190+K03943	no
Osteoclast differentiation	map04380	1	132	75	8796	0.678822	1	gene2269|K00922	.	0	gene2269|K00922	1	http://www.kegg.jp/pathway/map04380+K00922	no
Fructose and mannose metabolism	map00051	0	27	76	8901	1	1	-	.	0	.	0	http://www.kegg.jp/pathway/map00051+	no
Taste transduction	map04742	0	29	76	8899	1	1	-	.	0	.	0	http://www.kegg.jp/pathway/map04742+	no
Mismatch repair	map03430	0	25	76	8903	1	1	-	.	0	.	0	http://www.kegg.jp/pathway/map03430+	no
VEGF signaling pathway	map04370	1	54	75	8874	0.373507	1	gene2269|K00922	.	0	gene2269|K00922	1	http://www.kegg.jp/pathway/map04370+K00922	no
Terpenoid backbone biosynthesis	map00900	0	24	76	8904	1	1	-	.	0	.	0	http://www.kegg.jp/pathway/map00900+	no
Phototransduction	map04744	0	25	76	8903	1	1	-	.	0	.	0	http://www.kegg.jp/pathway/map04744+	no
Prostate cancer	map05215	2	85	74	8843	0.16695	1	gene11746|K03099;gene2269|K00922	gene11746|K03099	1	gene2269|K00922	1	http://www.kegg.jp/pathway/map05215+K03099+K00922	no
Neuroactive ligand-receptor interaction	map04080	3	272	73	8656	0.411212	1	gene19179|K05204;gene21326|K05186;gene2928|K04289	gene21326|K05186	1	gene19179|K05204;gene2928|K04289	2	http://www.kegg.jp/pathway/map04080+K05204+K05186+K04289	no
2-Oxocarboxylic acid metabolism	map01210	0	21	76	8907	1	1	-	.	0	.	0	http://www.kegg.jp/pathway/map01210+	no
Vascular smooth muscle contraction	map04270	2	116	74	8812	0.262726	1	gene18997|K12318;gene22269|K04958	gene18997|K12318	1	gene22269|K04958	1	http://www.kegg.jp/pathway/map04270+K12318+K04958	no
Salivary secretion	map04970	2	92	74	8836	0.188118	1	gene18997|K12318;gene22269|K04958	gene18997|K12318	1	gene22269|K04958	1	http://www.kegg.jp/pathway/map04970+K12318+K04958	no
Gastric acid secretion	map04971	1	75	75	8853	0.476346	1	gene22269|K04958	.	0	gene22269|K04958	1	http://www.kegg.jp/pathway/map04971+K04958	no
Pancreatic secretion	map04972	2	103	74	8825	0.222052	1	gene22269|K04958;gene26499|K04962	.	0	gene22269|K04958;gene26499|K04962	2	http://www.kegg.jp/pathway/map04972+K04958+K04962	no
MAPK signaling pathway	map04010	3	249	73	8679	0.358255	1	gene11746|K03099;gene20777|K08018;gene6571|K04458	gene11746|K03099;gene20777|K08018	2	gene6571|K04458	1	http://www.kegg.jp/pathway/map04010+K03099+K08018+K04458	no
Protein digestion and absorption	map04974	0	82	76	8846	1	1	-	.	0	.	0	http://www.kegg.jp/pathway/map04974+	no
Fat digestion and absorption	map04975	0	57	76	8871	1	1	-	.	0	.	0	http://www.kegg.jp/pathway/map04975+	no
Bile secretion	map04976	1	106	75	8822	0.598437	1	gene11122|K04943	.	0	gene11122|K04943	1	http://www.kegg.jp/pathway/map04976+K04943	no
Vitamin digestion and absorption	map04977	0	25	76	8903	1	1	-	.	0	.	0	http://www.kegg.jp/pathway/map04977+	no
Mineral absorption	map04978	1	87	75	8841	0.527433	1	gene2592|K14736	.	0	gene2592|K14736	1	http://www.kegg.jp/pathway/map04978+K14736	no
Thiamine metabolism	map00730	0	4	76	8924	1	1	-	.	0	.	0	http://www.kegg.jp/pathway/map00730+	no
Malaria	map05144	0	52	76	8876	1	1	-	.	0	.	0	http://www.kegg.jp/pathway/map05144+	no
Toxoplasmosis	map05145	1	132	75	8796	0.678822	1	gene2269|K00922	.	0	gene2269|K00922	1	http://www.kegg.jp/pathway/map05145+K00922	no
Fatty acid elongation	map00062	1	28	75	8900	0.218237	1	gene7403|K10249	.	0	gene7403|K10249	1	http://www.kegg.jp/pathway/map00062+K10249	no
African trypanosomiasis	map05143	0	33	76	8895	1	1	-	.	0	.	0	http://www.kegg.jp/pathway/map05143+	no
Leishmaniasis	map05140	0	65	76	8863	1	1	-	.	0	.	0	http://www.kegg.jp/pathway/map05140+	no
Fatty acid biosynthesis	map00061	0	7	76	8921	1	1	-	.	0	.	0	http://www.kegg.jp/pathway/map00061+	no
DNA replication	map03030	0	46	76	8882	1	1	-	.	0	.	0	http://www.kegg.jp/pathway/map03030+	no
Polyketide sugar unit biosynthesis	map00523	0	1	76	8927	1	1	-	.	0	.	0	http://www.kegg.jp/pathway/map00523+	no
Vitamin B6 metabolism	map00750	0	11	76	8917	1	1	-	.	0	.	0	http://www.kegg.jp/pathway/map00750+	no
Porphyrin and chlorophyll metabolism	map00860	0	94	76	8834	1	1	-	.	0	.	0	http://www.kegg.jp/pathway/map00860+	no
Type I diabetes mellitus	map04940	0	40	76	8888	1	1	-	.	0	.	0	http://www.kegg.jp/pathway/map04940+	no
Biosynthesis of amino acids	map01230	0	93	76	8835	1	1	-	.	0	.	0	http://www.kegg.jp/pathway/map01230+	no
Linoleic acid metabolism	map00591	0	35	76	8893	1	1	-	.	0	.	0	http://www.kegg.jp/pathway/map00591+	no
alpha-Linolenic acid metabolism	map00592	0	29	76	8899	1	1	-	.	0	.	0	http://www.kegg.jp/pathway/map00592+	no
Arachidonic acid metabolism	map00590	0	71	76	8857	1	1	-	.	0	.	0	http://www.kegg.jp/pathway/map00590+	no

## Sheet: BB_L_H_WW_L_H
Name	Map	Count1	Count2	Count3	Count4	p	q	Gene_in_DE	Up_Gene	Up_Count	Down_Gene	Down_Count	Links	Result
Endocytosis	map04144	10	208	63	8723	9.22582e-06	0.00251865	gene10124|K04679;gene11894|K11839;gene14255|K04646;gene14585|K12480;gene16590|K04237;gene2125|K12489;gene2295|K01115;gene27118|K12494;gene27308|K12470;gene4431|K05085	gene11894|K11839;gene14255|K04646;gene14585|K12480;gene16590|K04237;gene27118|K12494	5	gene10124|K04679;gene2125|K12489;gene2295|K01115;gene27308|K12470;gene4431|K05085	5	http://www.kegg.jp/pathway/map04144+K04679+K11839+K04646+K12480+K04237+K12489+K01115+K12494+K12470+K05085	yes
ErbB signaling pathway	map04012	4	78	69	8853	0.00431893	0.255501	gene20228|K02649;gene23885|K04409;gene4431|K05085;gene8419|K04365	.	0	gene20228|K02649;gene23885|K04409;gene4431|K05085;gene8419|K04365	4	http://www.kegg.jp/pathway/map04012+K02649+K04409+K05085+K04365	no
Cell adhesion molecules (CAMs)	map04514	5	128	68	8803	0.00438813	0.255501	gene10153|K06793;gene1749|K06491;gene26046|K06461;gene3853|K06487;gene6559|K06759	gene10153|K06793;gene1749|K06491;gene6559|K06759	3	gene26046|K06461;gene3853|K06487	2	http://www.kegg.jp/pathway/map04514+K06793+K06491+K06461+K06487+K06759	no
Bladder cancer	map05219	3	39	70	8892	0.00467951	0.255501	gene12290|K04445;gene13720|K06618;gene8419|K04365	.	0	gene12290|K04445;gene13720|K06618;gene8419|K04365	3	http://www.kegg.jp/pathway/map05219+K04445+K06618+K04365	no
Pancreatic cancer	map05212	4	76	69	8855	0.00395304	0.255501	gene13720|K06618;gene20228|K02649;gene569|K11217;gene8419|K04365	.	0	gene13720|K06618;gene20228|K02649;gene569|K11217;gene8419|K04365	4	http://www.kegg.jp/pathway/map05212+K06618+K02649+K11217+K04365	no
Acute myeloid leukemia	map05221	3	59	70	8872	0.0137391	0.339115	gene13862|K05092;gene20228|K02649;gene8419|K04365	.	0	gene13862|K05092;gene20228|K02649;gene8419|K04365	3	http://www.kegg.jp/pathway/map05221+K05092+K02649+K04365	no
Retrograde endocannabinoid signaling	map04723	4	97	69	8834	0.00898659	0.339115	gene10097|K05181;gene12962|K15291;gene26485|K04541;gene3389|K04634	gene10097|K05181	1	gene12962|K15291;gene3389|K04634	2	http://www.kegg.jp/pathway/map04723+K05181+K15291+K04541+K04634	no
Serotonergic synapse	map04726	4	108	69	8823	0.0127923	0.339115	gene10097|K05181;gene26485|K04541;gene3389|K04634;gene8419|K04365	gene10097|K05181	1	gene3389|K04634;gene8419|K04365	2	http://www.kegg.jp/pathway/map04726+K05181+K04541+K04634+K04365	no
Chemokine signaling pathway	map04062	5	177	68	8754	0.0158558	0.339115	gene16590|K04237;gene20228|K02649;gene23885|K04409;gene26485|K04541;gene8419|K04365	gene16590|K04237	1	gene20228|K02649;gene23885|K04409;gene8419|K04365	3	http://www.kegg.jp/pathway/map04062+K04237+K02649+K04409+K04541+K04365	no
Small cell lung cancer	map05222	4	116	69	8815	0.0161237	0.339115	gene13720|K06618;gene20228|K02649;gene25348|K16063;gene3853|K06487	.	0	gene13720|K06618;gene20228|K02649;gene25348|K16063;gene3853|K06487	4	http://www.kegg.jp/pathway/map05222+K06618+K02649+K16063+K06487	no
Non-small cell lung cancer	map05223	3	54	70	8877	0.0109391	0.339115	gene13720|K06618;gene20228|K02649;gene8419|K04365	.	0	gene13720|K06618;gene20228|K02649;gene8419|K04365	3	http://www.kegg.jp/pathway/map05223+K06618+K02649+K04365	no
MAPK signaling pathway	map04010	6	246	67	8685	0.0161483	0.339115	gene10165|K04352;gene12290|K04445;gene23885|K04409;gene2525|K08053;gene7901|K04858;gene8419|K04365	gene10165|K04352;gene2525|K08053;gene7901|K04858	3	gene10165|K04352;gene12290|K04445;gene23885|K04409;gene7901|K04858;gene8419|K04365	5	http://www.kegg.jp/pathway/map04010+K04352+K04445+K04409+K08053+K04858+K04365	no
Glioma	map05214	3	61	70	8870	0.0149628	0.339115	gene13720|K06618;gene20228|K02649;gene8419|K04365	.	0	gene13720|K06618;gene20228|K02649;gene8419|K04365	3	http://www.kegg.jp/pathway/map05214+K06618+K02649+K04365	no
Ubiquitin mediated proteolysis	map04120	5	190	68	8741	0.0207356	0.343515	gene16923|K10600;gene18418|K10684;gene20368|K10291;gene25348|K16063;gene5926|K10586	gene18418|K10684	1	gene16923|K10600;gene20368|K10291;gene25348|K16063;gene5926|K10586	4	http://www.kegg.jp/pathway/map04120+K10600+K10684+K10291+K16063+K10586	no
Arrhythmogenic right ventricular cardiomyopathy (ARVC)	map05412	3	68	70	8863	0.0197193	0.343515	gene27383|K10366;gene3853|K06487;gene7901|K04858	gene27383|K10366;gene7901|K04858	2	gene3853|K06487;gene7901|K04858	2	http://www.kegg.jp/pathway/map05412+K10366+K06487+K04858	no
Phototransduction - fly	map04745	2	26	71	8905	0.021391	0.343515	gene27300|K13807;gene3389|K04634	.	0	gene27300|K13807;gene3389|K04634	2	http://www.kegg.jp/pathway/map04745+K13807+K04634	no
Melanoma	map05218	3	67	70	8864	0.0189945	0.343515	gene13720|K06618;gene20228|K02649;gene8419|K04365	.	0	gene13720|K06618;gene20228|K02649;gene8419|K04365	3	http://www.kegg.jp/pathway/map05218+K06618+K02649+K04365	no
Renal cell carcinoma	map05211	3	74	70	8857	0.0243871	0.369871	gene20228|K02649;gene23885|K04409;gene8419|K04365	.	0	gene20228|K02649;gene23885|K04409;gene8419|K04365	3	http://www.kegg.jp/pathway/map05211+K02649+K04409+K04365	no
Propanoate metabolism	map00640	2	35	71	8896	0.0359728	0.392823	gene3825|K05605;gene5607|K01899	gene3825|K05605;gene5607|K01899	2	.	0	http://www.kegg.jp/pathway/map00640+K05605+K01899	no
Chronic myeloid leukemia	map05220	3	78	70	8853	0.0278027	0.392823	gene13720|K06618;gene20228|K02649;gene8419|K04365	.	0	gene13720|K06618;gene20228|K02649;gene8419|K04365	3	http://www.kegg.jp/pathway/map05220+K06618+K02649+K04365	no
Hypertrophic cardiomyopathy (HCM)	map05410	3	82	70	8849	0.0314605	0.392823	gene27383|K10366;gene3853|K06487;gene7901|K04858	gene27383|K10366;gene7901|K04858	2	gene3853|K06487;gene7901|K04858	2	http://www.kegg.jp/pathway/map05410+K10366+K06487+K04858	no
Dilated cardiomyopathy	map05414	3	84	70	8847	0.0333798	0.392823	gene27383|K10366;gene3853|K06487;gene7901|K04858	gene27383|K10366;gene7901|K04858	2	gene3853|K06487;gene7901|K04858	2	http://www.kegg.jp/pathway/map05414+K10366+K06487+K04858	no
mTOR signaling pathway	map04150	3	86	70	8845	0.035359	0.392823	gene20228|K02649;gene20390|K08267;gene8419|K04365	.	0	gene20228|K02649;gene20390|K08267;gene8419|K04365	3	http://www.kegg.jp/pathway/map04150+K02649+K08267+K04365	no
Pathways in cancer	map05200	7	375	66	8556	0.0345723	0.392823	gene13720|K06618;gene13862|K05092;gene20228|K02649;gene25348|K16063;gene3853|K06487;gene569|K11217;gene8419|K04365	.	0	gene13720|K06618;gene13862|K05092;gene20228|K02649;gene25348|K16063;gene3853|K06487;gene569|K11217;gene8419|K04365	7	http://www.kegg.jp/pathway/map05200+K06618+K05092+K02649+K16063+K06487+K11217+K04365	no
Prostate cancer	map05215	3	84	70	8847	0.0333798	0.392823	gene13720|K06618;gene20228|K02649;gene8419|K04365	.	0	gene13720|K06618;gene20228|K02649;gene8419|K04365	3	http://www.kegg.jp/pathway/map05215+K06618+K02649+K04365	no
Circadian entrainment	map04713	3	93	70	8838	0.0427538	0.448915	gene12290|K04445;gene26485|K04541;gene3389|K04634	.	0	gene12290|K04445;gene3389|K04634	2	http://www.kegg.jp/pathway/map04713+K04445+K04541+K04634	no
Aminoacyl-tRNA biosynthesis	map00970	2	47	71	8884	0.0597169	0.465792	gene11217|K00604;gene23865|K01893	gene11217|K00604	1	.	0	http://www.kegg.jp/pathway/map00970+K00604+K01893	no
Ether lipid metabolism	map00565	2	45	71	8886	0.0554588	0.465792	gene2295|K01115;gene3920|K00803	.	0	gene2295|K01115;gene3920|K00803	2	http://www.kegg.jp/pathway/map00565+K01115+K00803	no
Cholinergic synapse	map04725	3	106	70	8825	0.058366	0.465792	gene20228|K02649;gene26485|K04541;gene3389|K04634	.	0	gene20228|K02649;gene3389|K04634	2	http://www.kegg.jp/pathway/map04725+K02649+K04541+K04634	no
Amoebiasis	map05146	3	100	70	8831	0.0508628	0.465792	gene20228|K02649;gene26046|K06461;gene3389|K04634	.	0	gene20228|K02649;gene26046|K06461;gene3389|K04634	3	http://www.kegg.jp/pathway/map05146+K02649+K06461+K04634	no
Regulation of actin cytoskeleton	map04810	5	241	68	8690	0.048941	0.465792	gene20228|K02649;gene23885|K04409;gene26046|K06461;gene3853|K06487;gene8419|K04365	.	0	gene20228|K02649;gene23885|K04409;gene26046|K06461;gene3853|K06487;gene8419|K04365	5	http://www.kegg.jp/pathway/map04810+K02649+K04409+K06461+K06487+K04365	no
Proteoglycans in cancer	map05205	5	246	68	8685	0.0525328	0.465792	gene20228|K02649;gene23885|K04409;gene3853|K06487;gene4431|K05085;gene8419|K04365	.	0	gene20228|K02649;gene23885|K04409;gene3853|K06487;gene4431|K05085;gene8419|K04365	5	http://www.kegg.jp/pathway/map05205+K02649+K04409+K06487+K05085+K04365	no
Transcriptional misregulation in cancer	map05202	4	173	69	8758	0.0551847	0.465792	gene13862|K05092;gene19007|K04728;gene26046|K06461;gene26558|K11449	.	0	gene13862|K05092;gene19007|K04728;gene26046|K06461;gene26558|K11449	4	http://www.kegg.jp/pathway/map05202+K05092+K04728+K06461+K11449	no
Endocrine and other factor-regulated calcium reabsorption	map04961	2	46	71	8885	0.0575739	0.465792	gene14255|K04646;gene3389|K04634	gene14255|K04646	1	gene3389|K04634	1	http://www.kegg.jp/pathway/map04961+K04646+K04634	no
Fc gamma R-mediated phagocytosis	map04666	3	103	70	8828	0.0545517	0.465792	gene20228|K02649;gene2295|K01115;gene23885|K04409	.	0	gene20228|K02649;gene2295|K01115;gene23885|K04409	3	http://www.kegg.jp/pathway/map04666+K02649+K01115+K04409	no
Glutamatergic synapse	map04724	3	111	70	8820	0.0649966	0.492891	gene2295|K01115;gene26485|K04541;gene3389|K04634	.	0	gene2295|K01115;gene3389|K04634	2	http://www.kegg.jp/pathway/map04724+K01115+K04541+K04634	no
Long-term depression	map04730	2	55	71	8876	0.0777971	0.537613	gene3389|K04634;gene8419|K04365	.	0	gene3389|K04634;gene8419|K04365	2	http://www.kegg.jp/pathway/map04730+K04634+K04365	no
Neurotrophin signaling pathway	map04722	3	122	70	8809	0.0807405	0.537613	gene12290|K04445;gene20228|K02649;gene8419|K04365	.	0	gene12290|K04445;gene20228|K02649;gene8419|K04365	3	http://www.kegg.jp/pathway/map04722+K04445+K02649+K04365	no
Valine, leucine and isoleucine degradation	map00280	2	54	71	8877	0.0754512	0.537613	gene3042|K05607;gene3825|K05605	gene3042|K05607;gene3825|K05605	2	.	0	http://www.kegg.jp/pathway/map00280+K05607+K05605	no
Focal adhesion	map04510	4	196	69	8735	0.0788264	0.537613	gene20228|K02649;gene23885|K04409;gene3853|K06487;gene8419|K04365	.	0	gene20228|K02649;gene23885|K04409;gene3853|K06487;gene8419|K04365	4	http://www.kegg.jp/pathway/map04510+K02649+K04409+K06487+K04365	no
Endometrial cancer	map05213	2	55	71	8876	0.0777971	0.537613	gene20228|K02649;gene8419|K04365	.	0	gene20228|K02649;gene8419|K04365	2	http://www.kegg.jp/pathway/map05213+K02649+K04365	no
Natural killer cell mediated cytotoxicity	map04650	3	129	70	8802	0.0915435	0.595033	gene20228|K02649;gene23885|K04409;gene8419|K04365	.	0	gene20228|K02649;gene23885|K04409;gene8419|K04365	3	http://www.kegg.jp/pathway/map04650+K02649+K04409+K04365	no
Leishmaniasis	map05140	2	63	71	8868	0.0973478	0.603999	gene26046|K06461;gene569|K11217	.	0	gene26046|K06461;gene569|K11217	2	http://www.kegg.jp/pathway/map05140+K06461+K11217	no
Lysosome	map04142	3	132	70	8799	0.09635	0.603999	gene10859|K12384;gene11193|K01135;gene14255|K04646	gene14255|K04646	1	gene10859|K12384;gene11193|K01135	2	http://www.kegg.jp/pathway/map04142+K12384+K01135+K04646	no
Axon guidance	map04360	3	134	70	8797	0.0996112	0.604308	gene10165|K04352;gene10742|K05106;gene23885|K04409	gene10165|K04352	1	gene10165|K04352;gene10742|K05106;gene23885|K04409	3	http://www.kegg.jp/pathway/map04360+K04352+K05106+K04409	no
Long-term potentiation	map04720	2	69	71	8862	0.112824	0.656693	gene3389|K04634;gene8419|K04365	.	0	gene3389|K04634;gene8419|K04365	2	http://www.kegg.jp/pathway/map04720+K04634+K04365	no
Hepatitis C	map05160	3	143	70	8788	0.114826	0.656693	gene20228|K02649;gene569|K11217;gene8419|K04365	.	0	gene20228|K02649;gene569|K11217;gene8419|K04365	3	http://www.kegg.jp/pathway/map05160+K02649+K11217+K04365	no
Synaptic vesicle cycle	map04721	2	70	71	8861	0.115462	0.656693	gene12962|K15291;gene14255|K04646	gene14255|K04646	1	gene12962|K15291	1	http://www.kegg.jp/pathway/map04721+K15291+K04646	no
Viral myocarditis	map05416	2	73	71	8858	0.123473	0.687922	gene27383|K10366;gene4870|K03260	gene27383|K10366	1	gene4870|K03260	1	http://www.kegg.jp/pathway/map05416+K10366+K03260	no
Morphine addiction	map05032	2	76	71	8855	0.131616	0.718621	gene10097|K05181;gene26485|K04541	gene10097|K05181	1	.	0	http://www.kegg.jp/pathway/map05032+K05181+K04541	no
GABAergic synapse	map04727	2	86	71	8845	0.159574	0.746868	gene10097|K05181;gene26485|K04541	gene10097|K05181	1	.	0	http://www.kegg.jp/pathway/map04727+K05181+K04541	no
RNA degradation	map03018	2	80	71	8851	0.142659	0.746868	gene13861|K12572;gene8669|K12603	.	0	gene13861|K12572;gene8669|K12603	2	http://www.kegg.jp/pathway/map03018+K12572+K12603	no
Peroxisome	map04146	2	84	71	8847	0.153893	0.746868	gene12723|K13341;gene3920|K00803	.	0	gene12723|K13341;gene3920|K00803	2	http://www.kegg.jp/pathway/map04146+K13341+K00803	no
Glycosaminoglycan degradation	map00531	1	21	72	8910	0.164147	0.746868	gene11193|K01135	.	0	gene11193|K01135	1	http://www.kegg.jp/pathway/map00531+K01135	no
Viral carcinogenesis	map05203	4	244	69	8687	0.141517	0.746868	gene13720|K06618;gene20228|K02649;gene2525|K08053;gene569|K11217	gene2525|K08053	1	gene13720|K06618;gene20228|K02649;gene569|K11217	3	http://www.kegg.jp/pathway/map05203+K06618+K02649+K08053+K11217	no
Hematopoietic cell lineage	map04640	2	84	71	8847	0.153893	0.746868	gene13862|K05092;gene26046|K06461	.	0	gene13862|K05092;gene26046|K06461	2	http://www.kegg.jp/pathway/map04640+K05092+K06461	no
Jak-STAT signaling pathway	map04630	3	167	70	8764	0.159214	0.746868	gene20228|K02649;gene25348|K16063;gene569|K11217	.	0	gene20228|K02649;gene25348|K16063;gene569|K11217	3	http://www.kegg.jp/pathway/map04630+K02649+K16063+K11217	no
GnRH signaling pathway	map04912	2	86	71	8845	0.159574	0.746868	gene2295|K01115;gene3389|K04634	.	0	gene2295|K01115;gene3389|K04634	2	http://www.kegg.jp/pathway/map04912+K01115+K04634	no
Cell cycle	map04110	3	167	70	8764	0.159214	0.746868	gene13720|K06618;gene19007|K04728;gene2518|K09392	.	0	gene13720|K06618;gene19007|K04728;gene2518|K09392	3	http://www.kegg.jp/pathway/map04110+K06618+K04728+K09392	no
Colorectal cancer	map05210	2	87	71	8844	0.16243	0.746868	gene20228|K02649;gene8419|K04365	.	0	gene20228|K02649;gene8419|K04365	2	http://www.kegg.jp/pathway/map05210+K02649+K04365	no
Hepatitis B	map05161	3	177	70	8754	0.179082	0.788539	gene13720|K06618;gene20228|K02649;gene569|K11217	.	0	gene13720|K06618;gene20228|K02649;gene569|K11217	3	http://www.kegg.jp/pathway/map05161+K06618+K02649+K11217	no
Bacterial invasion of epithelial cells	map05100	2	92	71	8839	0.176842	0.788539	gene14255|K04646;gene20228|K02649	gene14255|K04646	1	gene20228|K02649	1	http://www.kegg.jp/pathway/map05100+K04646+K02649	no
One carbon pool by folate	map00670	1	24	72	8907	0.184364	0.798909	gene11217|K00604	gene11217|K00604	1	.	0	http://www.kegg.jp/pathway/map00670+K00604	no
Estrogen signaling pathway	map04915	2	97	71	8834	0.191451	0.816658	gene20228|K02649;gene3389|K04634	.	0	gene20228|K02649;gene3389|K04634	2	http://www.kegg.jp/pathway/map04915+K02649+K04634	no
T cell receptor signaling pathway	map04660	2	100	71	8831	0.200294	0.841236	gene20228|K02649;gene23885|K04409	.	0	gene20228|K02649;gene23885|K04409	2	http://www.kegg.jp/pathway/map04660+K02649+K04409	no
Fatty acid elongation	map00062	1	28	72	8903	0.210571	0.857998	gene7403|K10249	.	0	gene7403|K10249	1	http://www.kegg.jp/pathway/map00062+K10249	no
Apoptosis	map04210	2	103	71	8828	0.209187	0.857998	gene19007|K04728;gene20228|K02649	.	0	gene19007|K04728;gene20228|K02649	2	http://www.kegg.jp/pathway/map04210+K04728+K02649	no
Progesterone-mediated oocyte maturation	map04914	2	105	71	8826	0.215138	0.863717	gene20228|K02649;gene8419|K04365	.	0	gene20228|K02649;gene8419|K04365	2	http://www.kegg.jp/pathway/map04914+K02649+K04365	no
Glycosylphosphatidylinositol (GPI)-anchor biosynthesis	map00563	1	31	72	8900	0.22968	0.889789	gene639|K05290	gene639|K05290	1	.	0	http://www.kegg.jp/pathway/map00563+K05290	no
Mucin type O-glycan biosynthesis	map00512	1	34	72	8897	0.248332	0.889789	gene25166|K00710	.	0	gene25166|K00710	1	http://www.kegg.jp/pathway/map00512+K00710	no
Chagas disease (American trypanosomiasis)	map05142	2	120	71	8811	0.260165	0.889789	gene20228|K02649;gene3389|K04634	.	0	gene20228|K02649;gene3389|K04634	2	http://www.kegg.jp/pathway/map05142+K02649+K04634	no
African trypanosomiasis	map05143	1	32	72	8899	0.235947	0.889789	gene3389|K04634	.	0	gene3389|K04634	1	http://www.kegg.jp/pathway/map05143+K04634	no
Ribosome biogenesis in eukaryotes	map03008	2	121	71	8810	0.26318	0.889789	gene15796|K14571;gene20752|K14575	gene15796|K14571	1	gene20752|K14575	1	http://www.kegg.jp/pathway/map03008+K14571+K14575	no
HTLV-I infection	map05166	4	304	69	8627	0.23942	0.889789	gene13720|K06618;gene19007|K04728;gene20228|K02649;gene569|K11217	.	0	gene13720|K06618;gene19007|K04728;gene20228|K02649;gene569|K11217	4	http://www.kegg.jp/pathway/map05166+K06618+K04728+K02649+K11217	no
Vascular smooth muscle contraction	map04270	2	116	71	8815	0.248114	0.889789	gene3389|K04634;gene8419|K04365	.	0	gene3389|K04634;gene8419|K04365	2	http://www.kegg.jp/pathway/map04270+K04634+K04365	no
Epstein-Barr virus infection	map05169	3	217	70	8714	0.264003	0.889789	gene13720|K06618;gene20228|K02649;gene569|K11217	.	0	gene13720|K06618;gene20228|K02649;gene569|K11217	3	http://www.kegg.jp/pathway/map05169+K06618+K02649+K11217	no
Ascorbate and aldarate metabolism	map00053	1	32	72	8899	0.235947	0.889789	gene10611|K00012	gene10611|K00012	1	.	0	http://www.kegg.jp/pathway/map00053+K00012	no
Butanoate metabolism	map00650	1	36	72	8895	0.260519	0.889789	gene11747|K00109	gene11747|K00109	1	gene11747|K00109	1	http://www.kegg.jp/pathway/map00650+K00109	no
TNF signaling pathway	map04668	2	112	71	8819	0.236086	0.889789	gene12290|K04445;gene20228|K02649	.	0	gene12290|K04445;gene20228|K02649	2	http://www.kegg.jp/pathway/map04668+K04445+K02649	no
Prion diseases	map05020	1	33	72	8898	0.242165	0.889789	gene1749|K06491	gene1749|K06491	1	.	0	http://www.kegg.jp/pathway/map05020+K06491	no
Thyroid cancer	map05216	1	35	72	8896	0.25445	0.889789	gene8419|K04365	.	0	gene8419|K04365	1	http://www.kegg.jp/pathway/map05216+K04365	no
Citrate cycle (TCA cycle)	map00020	1	38	72	8893	0.272511	0.896331	gene5607|K01899	gene5607|K01899	1	.	0	http://www.kegg.jp/pathway/map00020+K01899	no
Leukocyte transendothelial migration	map04670	2	124	71	8807	0.272226	0.896331	gene20228|K02649;gene26046|K06461	.	0	gene20228|K02649;gene26046|K06461	2	http://www.kegg.jp/pathway/map04670+K02649+K06461	no
Nicotine addiction	map05033	1	40	72	8891	0.284311	0.899732	gene10097|K05181	gene10097|K05181	1	.	0	http://www.kegg.jp/pathway/map05033+K05181	no
Toxoplasmosis	map05145	2	131	71	8800	0.293319	0.899732	gene20228|K02649;gene569|K11217	.	0	gene20228|K02649;gene569|K11217	2	http://www.kegg.jp/pathway/map05145+K02649+K11217	no
Osteoclast differentiation	map04380	2	131	71	8800	0.293319	0.899732	gene20228|K02649;gene569|K11217	.	0	gene20228|K02649;gene569|K11217	2	http://www.kegg.jp/pathway/map04380+K02649+K11217	no
Pentose and glucuronate interconversions	map00040	1	41	72	8890	0.29014	0.899732	gene10611|K00012	gene10611|K00012	1	.	0	http://www.kegg.jp/pathway/map00040+K00012	no
beta-Alanine metabolism	map00410	1	39	72	8892	0.278435	0.899732	gene3825|K05605	gene3825|K05605	1	.	0	http://www.kegg.jp/pathway/map00410+K05605	no
Aldosterone-regulated sodium reabsorption	map04960	1	40	72	8891	0.284311	0.899732	gene20228|K02649	.	0	gene20228|K02649	1	http://www.kegg.jp/pathway/map04960+K02649	no
Type II diabetes mellitus	map04930	1	44	72	8887	0.307347	0.913946	gene20228|K02649	.	0	gene20228|K02649	1	http://www.kegg.jp/pathway/map04930+K02649	no
Dopaminergic synapse	map04728	2	136	71	8795	0.308345	0.913946	gene26485|K04541;gene3389|K04634	.	0	gene3389|K04634	1	http://www.kegg.jp/pathway/map04728+K04541+K04634	no
Base excision repair	map03410	1	44	72	8887	0.307347	0.913946	gene22663|K10801	.	0	gene22663|K10801	1	http://www.kegg.jp/pathway/map03410+K10801	no
Measles	map05162	2	137	71	8794	0.311344	0.913946	gene20228|K02649;gene569|K11217	.	0	gene20228|K02649;gene569|K11217	2	http://www.kegg.jp/pathway/map05162+K02649+K11217	no
Carbohydrate digestion and absorption	map04973	1	46	72	8885	0.31859	0.925266	gene20228|K02649	.	0	gene20228|K02649	1	http://www.kegg.jp/pathway/map04973+K02649	no
D-Arginine and D-ornithine metabolism	map00472	0	1	73	8930	1	1	-	.	0	.	0	http://www.kegg.jp/pathway/map00472+	no
D-Glutamine and D-glutamate metabolism	map00471	0	6	73	8925	1	1	-	.	0	.	0	http://www.kegg.jp/pathway/map00471+	no
PI3K-Akt signaling pathway	map04151	4	372	69	8559	0.363821	1	gene20228|K02649;gene26485|K04541;gene3853|K06487;gene569|K11217	.	0	gene20228|K02649;gene3853|K06487;gene569|K11217	3	http://www.kegg.jp/pathway/map04151+K02649+K04541+K06487+K11217	no
Nicotinate and nicotinamide metabolism	map00760	0	33	73	8898	1	1	-	.	0	.	0	http://www.kegg.jp/pathway/map00760+	no
RIG-I-like receptor signaling pathway	map04622	0	79	73	8852	1	1	-	.	0	.	0	http://www.kegg.jp/pathway/map04622+	no
Terpenoid backbone biosynthesis	map00900	0	24	73	8907	1	1	-	.	0	.	0	http://www.kegg.jp/pathway/map00900+	no
Gap junction	map04540	1	93	72	8838	0.53662	1	gene3389|K04634	.	0	gene3389|K04634	1	http://www.kegg.jp/pathway/map04540+K04634	no
Fanconi anemia pathway	map03460	0	54	73	8877	1	1	-	.	0	.	0	http://www.kegg.jp/pathway/map03460+	no
Notch signaling pathway	map04330	0	59	73	8872	1	1	-	.	0	.	0	http://www.kegg.jp/pathway/map04330+	no
Rheumatoid arthritis	map05323	0	92	73	8839	1	1	-	.	0	.	0	http://www.kegg.jp/pathway/map05323+	no
Glutathione metabolism	map00480	0	64	73	8867	1	1	-	.	0	.	0	http://www.kegg.jp/pathway/map00480+	no
Graft-versus-host disease	map05332	0	32	73	8899	1	1	-	.	0	.	0	http://www.kegg.jp/pathway/map05332+	no
Pyrimidine metabolism	map00240	0	110	73	8821	1	1	-	.	0	.	0	http://www.kegg.jp/pathway/map00240+	no
Inflammatory bowel disease (IBD)	map05321	0	55	73	8876	1	1	-	.	0	.	0	http://www.kegg.jp/pathway/map05321+	no
Autoimmune thyroid disease	map05320	0	46	73	8885	1	1	-	.	0	.	0	http://www.kegg.jp/pathway/map05320+	no
Fatty acid biosynthesis	map00061	0	7	73	8924	1	1	-	.	0	.	0	http://www.kegg.jp/pathway/map00061+	no
Systemic lupus erythematosus	map05322	0	128	73	8803	1	1	-	.	0	.	0	http://www.kegg.jp/pathway/map05322+	no
Phenylalanine metabolism	map00360	0	28	73	8903	1	1	-	.	0	.	0	http://www.kegg.jp/pathway/map00360+	no
SNARE interactions in vesicular transport	map04130	0	40	73	8891	1	1	-	.	0	.	0	http://www.kegg.jp/pathway/map04130+	no
DNA replication	map03030	0	46	73	8885	1	1	-	.	0	.	0	http://www.kegg.jp/pathway/map03030+	no
Renin-angiotensin system	map04614	0	18	73	8913	1	1	-	.	0	.	0	http://www.kegg.jp/pathway/map04614+	no
Folate biosynthesis	map00790	0	14	73	8917	1	1	-	.	0	.	0	http://www.kegg.jp/pathway/map00790+	no
Glycerolipid metabolism	map00561	0	58	73	8873	1	1	-	.	0	.	0	http://www.kegg.jp/pathway/map00561+	no
Inositol phosphate metabolism	map00562	0	62	73	8869	1	1	-	.	0	.	0	http://www.kegg.jp/pathway/map00562+	no
Glycerophospholipid metabolism	map00564	1	98	72	8833	0.555298	1	gene2295|K01115	.	0	gene2295|K01115	1	http://www.kegg.jp/pathway/map00564+K01115	no
Glycolysis / Gluconeogenesis	map00010	0	86	73	8845	1	1	-	.	0	.	0	http://www.kegg.jp/pathway/map00010+	no
Alanine, aspartate and glutamate metabolism	map00250	0	42	73	8889	1	1	-	.	0	.	0	http://www.kegg.jp/pathway/map00250+	no
Protein export	map03060	0	22	73	8909	1	1	-	.	0	.	0	http://www.kegg.jp/pathway/map03060+	no
Taurine and hypotaurine metabolism	map00430	0	11	73	8920	1	1	-	.	0	.	0	http://www.kegg.jp/pathway/map00430+	no
Phenylalanine, tyrosine and tryptophan biosynthesis	map00400	0	6	73	8925	1	1	-	.	0	.	0	http://www.kegg.jp/pathway/map00400+	no
Tight junction	map04530	1	140	72	8791	0.685532	1	gene16590|K04237	gene16590|K04237	1	.	0	http://www.kegg.jp/pathway/map04530+K04237	no
Amphetamine addiction	map05031	0	71	73	8860	1	1	-	.	0	.	0	http://www.kegg.jp/pathway/map05031+	no
Wnt signaling pathway	map04310	1	153	72	8778	0.717609	1	gene27199|K04508	gene27199|K04508	1	.	0	http://www.kegg.jp/pathway/map04310+K04508	no
Antigen processing and presentation	map04612	0	77	73	8854	1	1	-	.	0	.	0	http://www.kegg.jp/pathway/map04612+	no
Alcoholism	map05034	2	175	71	8756	0.422256	1	gene26485|K04541;gene8419|K04365	.	0	gene8419|K04365	1	http://www.kegg.jp/pathway/map05034+K04541+K04365	no
Complement and coagulation cascades	map04610	0	79	73	8852	1	1	-	.	0	.	0	http://www.kegg.jp/pathway/map04610+	no
Oocyte meiosis	map04114	0	148	73	8783	1	1	-	.	0	.	0	http://www.kegg.jp/pathway/map04114+	no
Salmonella infection	map05132	0	106	73	8825	1	1	-	.	0	.	0	http://www.kegg.jp/pathway/map05132+	no
Biosynthesis of amino acids	map01230	0	93	73	8838	1	1	-	.	0	.	0	http://www.kegg.jp/pathway/map01230+	no
Legionellosis	map05134	1	112	72	8819	0.603736	1	gene26046|K06461	.	0	gene26046|K06461	1	http://www.kegg.jp/pathway/map05134+K06461	no
Hippo signaling pathway - fly	map04391	1	83	72	8848	0.496912	1	gene16590|K04237	gene16590|K04237	1	.	0	http://www.kegg.jp/pathway/map04391+K04237	no
Allograft rejection	map05330	0	37	73	8894	1	1	-	.	0	.	0	http://www.kegg.jp/pathway/map05330+	no
Sulfur relay system	map04122	0	14	73	8917	1	1	-	.	0	.	0	http://www.kegg.jp/pathway/map04122+	no
mRNA surveillance pathway	map03015	0	147	73	8784	1	1	-	.	0	.	0	http://www.kegg.jp/pathway/map03015+	no
Histidine metabolism	map00340	0	25	73	8906	1	1	-	.	0	.	0	http://www.kegg.jp/pathway/map00340+	no
Ribosome	map03010	0	772	73	8159	1	1	-	.	0	.	0	http://www.kegg.jp/pathway/map03010+	no
RNA transport	map03013	2	267	71	8664	0.646333	1	gene3866|K14313;gene4870|K03260	gene3866|K14313	1	gene4870|K03260	1	http://www.kegg.jp/pathway/map03013+K14313+K03260	no
Selenocompound metabolism	map00450	0	27	73	8904	1	1	-	.	0	.	0	http://www.kegg.jp/pathway/map00450+	no
Steroid biosynthesis	map00100	0	18	73	8913	1	1	-	.	0	.	0	http://www.kegg.jp/pathway/map00100+	no
Other glycan degradation	map00511	0	28	73	8903	1	1	-	.	0	.	0	http://www.kegg.jp/pathway/map00511+	no
N-Glycan biosynthesis	map00510	0	63	73	8868	1	1	-	.	0	.	0	http://www.kegg.jp/pathway/map00510+	no
Sulfur metabolism	map00920	0	16	73	8915	1	1	-	.	0	.	0	http://www.kegg.jp/pathway/map00920+	no
Cytosolic DNA-sensing pathway	map04623	0	58	73	8873	1	1	-	.	0	.	0	http://www.kegg.jp/pathway/map04623+	no
NOD-like receptor signaling pathway	map04621	1	55	72	8876	0.366994	1	gene20238|K12796	gene20238|K12796	1	.	0	http://www.kegg.jp/pathway/map04621+K12796	no
Toll-like receptor signaling pathway	map04620	1	108	72	8823	0.590454	1	gene20228|K02649	.	0	gene20228|K02649	1	http://www.kegg.jp/pathway/map04620+K02649	no
Pertussis	map05133	1	85	72	8846	0.505113	1	gene26046|K06461	.	0	gene26046|K06461	1	http://www.kegg.jp/pathway/map05133+K06461	no
Asthma	map05310	0	23	73	8908	1	1	-	.	0	.	0	http://www.kegg.jp/pathway/map05310+	no
Glycine, serine and threonine metabolism	map00260	0	50	73	8881	1	1	-	.	0	.	0	http://www.kegg.jp/pathway/map00260+	no
Hippo signaling pathway	map04390	1	174	72	8757	0.76274	1	gene16590|K04237	gene16590|K04237	1	.	0	http://www.kegg.jp/pathway/map04390+K04237	no
Type I diabetes mellitus	map04940	0	40	73	8891	1	1	-	.	0	.	0	http://www.kegg.jp/pathway/map04940+	no
Biosynthesis of unsaturated fatty acids	map01040	0	25	73	8906	1	1	-	.	0	.	0	http://www.kegg.jp/pathway/map01040+	no
Sphingolipid metabolism	map00600	0	52	73	8879	1	1	-	.	0	.	0	http://www.kegg.jp/pathway/map00600+	no
Carbon metabolism	map01200	1	120	72	8811	0.629039	1	gene5607|K01899	gene5607|K01899	1	.	0	http://www.kegg.jp/pathway/map01200+K01899	no
Pantothenate and CoA biosynthesis	map00770	0	18	73	8913	1	1	-	.	0	.	0	http://www.kegg.jp/pathway/map00770+	no
Starch and sucrose metabolism	map00500	1	63	72	8868	0.407162	1	gene10611|K00012	gene10611|K00012	1	.	0	http://www.kegg.jp/pathway/map00500+K00012	no
Malaria	map05144	0	52	73	8879	1	1	-	.	0	.	0	http://www.kegg.jp/pathway/map05144+	no
Synthesis and degradation of ketone bodies	map00072	0	14	73	8917	1	1	-	.	0	.	0	http://www.kegg.jp/pathway/map00072+	no
Nitrogen metabolism	map00910	0	31	73	8900	1	1	-	.	0	.	0	http://www.kegg.jp/pathway/map00910+	no
Fatty acid degradation	map00071	0	45	73	8886	1	1	-	.	0	.	0	http://www.kegg.jp/pathway/map00071+	no
Huntington's disease	map05016	3	269	70	8662	0.379716	1	gene11055|K04533;gene14255|K04646;gene3389|K04634	gene14255|K04646	1	gene11055|K04533;gene3389|K04634	2	http://www.kegg.jp/pathway/map05016+K04533+K04646+K04634	no
Lysine degradation	map00310	0	86	73	8845	1	1	-	.	0	.	0	http://www.kegg.jp/pathway/map00310+	no
Parkinson's disease	map05012	0	205	73	8726	1	1	-	.	0	.	0	http://www.kegg.jp/pathway/map05012+	no
Alzheimer's disease	map05010	2	236	71	8695	0.579134	1	gene24666|K01408;gene3389|K04634	gene24666|K01408	1	gene3389|K04634	1	http://www.kegg.jp/pathway/map05010+K01408+K04634	no
Drug metabolism - other enzymes	map00983	0	54	73	8877	1	1	-	.	0	.	0	http://www.kegg.jp/pathway/map00983+	no
Metabolism of xenobiotics by cytochrome P450	map00980	0	90	73	8841	1	1	-	.	0	.	0	http://www.kegg.jp/pathway/map00980+	no
Protein processing in endoplasmic reticulum	map04141	2	221	71	8710	0.543494	1	gene14052|K11718;gene3795|K11718	gene14052|K11718;gene3795|K11718	2	gene14052|K11718	1	http://www.kegg.jp/pathway/map04141+K11718+K11718	no
Phagosome	map04145	2	160	71	8771	0.379353	1	gene26046|K06461;gene3853|K06487	.	0	gene26046|K06461;gene3853|K06487	2	http://www.kegg.jp/pathway/map04145+K06461+K06487	no
Tuberculosis	map05152	2	199	71	8732	0.48765	1	gene26046|K06461;gene569|K11217	.	0	gene26046|K06461;gene569|K11217	2	http://www.kegg.jp/pathway/map05152+K06461+K11217	no
Staphylococcus aureus infection	map05150	1	53	72	8878	0.356539	1	gene26046|K06461	.	0	gene26046|K06461	1	http://www.kegg.jp/pathway/map05150+K06461	no
Cysteine and methionine metabolism	map00270	0	48	73	8883	1	1	-	.	0	.	0	http://www.kegg.jp/pathway/map00270+	no
Calcium signaling pathway	map04020	2	191	71	8740	0.466341	1	gene3389|K04634;gene4431|K05085	.	0	gene3389|K04634;gene4431|K05085	2	http://www.kegg.jp/pathway/map04020+K04634+K05085	no
MAPK signaling pathway - fly	map04013	0	18	73	8913	1	1	-	.	0	.	0	http://www.kegg.jp/pathway/map04013+	no
Mineral absorption	map04978	0	88	73	8843	1	1	-	.	0	.	0	http://www.kegg.jp/pathway/map04978+	no
Glyoxylate and dicarboxylate metabolism	map00630	0	34	73	8897	1	1	-	.	0	.	0	http://www.kegg.jp/pathway/map00630+	no
Pancreatic secretion	map04972	1	104	72	8827	0.576734	1	gene3389|K04634	.	0	gene3389|K04634	1	http://www.kegg.jp/pathway/map04972+K04634	no
Gastric acid secretion	map04971	1	75	72	8856	0.462746	1	gene3389|K04634	.	0	gene3389|K04634	1	http://www.kegg.jp/pathway/map04971+K04634	no
Salivary secretion	map04970	1	93	72	8838	0.53662	1	gene3389|K04634	.	0	gene3389|K04634	1	http://www.kegg.jp/pathway/map04970+K04634	no
Vitamin digestion and absorption	map04977	0	25	73	8906	1	1	-	.	0	.	0	http://www.kegg.jp/pathway/map04977+	no
Bile secretion	map04976	0	107	73	8824	1	1	-	.	0	.	0	http://www.kegg.jp/pathway/map04976+	no
Fat digestion and absorption	map04975	0	57	73	8874	1	1	-	.	0	.	0	http://www.kegg.jp/pathway/map04975+	no
Protein digestion and absorption	map04974	0	82	73	8849	1	1	-	.	0	.	0	http://www.kegg.jp/pathway/map04974+	no
Primary bile acid biosynthesis	map00120	0	15	73	8916	1	1	-	.	0	.	0	http://www.kegg.jp/pathway/map00120+	no
Glycosaminoglycan biosynthesis - heparan sulfate / heparin	map00534	0	24	73	8907	1	1	-	.	0	.	0	http://www.kegg.jp/pathway/map00534+	no
Glycosaminoglycan biosynthesis - keratan sulfate	map00533	0	16	73	8915	1	1	-	.	0	.	0	http://www.kegg.jp/pathway/map00533+	no
Glycosaminoglycan biosynthesis - chondroitin sulfate / dermatan sulfate	map00532	0	21	73	8910	1	1	-	.	0	.	0	http://www.kegg.jp/pathway/map00532+	no
Hedgehog signaling pathway	map04340	0	55	73	8876	1	1	-	.	0	.	0	http://www.kegg.jp/pathway/map04340+	no
Homologous recombination	map03440	0	30	73	8901	1	1	-	.	0	.	0	http://www.kegg.jp/pathway/map03440+	no
Cocaine addiction	map05030	0	51	73	8880	1	1	-	.	0	.	0	http://www.kegg.jp/pathway/map05030+	no
Phosphatidylinositol signaling system	map04070	1	81	72	8850	0.488577	1	gene20228|K02649	.	0	gene20228|K02649	1	http://www.kegg.jp/pathway/map04070+K02649	no
Cardiac muscle contraction	map04260	1	92	72	8839	0.532793	1	gene7901|K04858	gene7901|K04858	1	gene7901|K04858	1	http://www.kegg.jp/pathway/map04260+K04858	no
Nucleotide excision repair	map03420	0	52	73	8879	1	1	-	.	0	.	0	http://www.kegg.jp/pathway/map03420+	no
Proteasome	map03050	1	52	72	8879	0.351248	1	gene12945|K02732	.	0	gene12945|K02732	1	http://www.kegg.jp/pathway/map03050+K02732	no
Chemical carcinogenesis	map05204	0	86	73	8845	1	1	-	.	0	.	0	http://www.kegg.jp/pathway/map05204+	no
Herpes simplex infection	map05168	2	260	71	8671	0.631921	1	gene569|K11217;gene6942|K14966	gene6942|K14966	1	gene569|K11217	1	http://www.kegg.jp/pathway/map05168+K11217+K14966	no
Influenza A	map05164	2	187	71	8744	0.455498	1	gene20228|K02649;gene569|K11217	.	0	gene20228|K02649;gene569|K11217	2	http://www.kegg.jp/pathway/map05164+K02649+K11217	no
Metabolic pathways	map01100	11	1404	62	7527	0.610273	1	gene10611|K00012;gene11193|K01135;gene19644|K00472;gene19774|K13997;gene2295|K01115;gene25166|K00710;gene3042|K05607;gene3825|K05605;gene3920|K00803;gene5607|K01899;gene639|K05290	gene10611|K00012;gene19774|K13997;gene3042|K05607;gene3825|K05605;gene5607|K01899;gene639|K05290	6	gene11193|K01135;gene19644|K00472;gene2295|K01115;gene25166|K00710;gene3920|K00803	5	http://www.kegg.jp/pathway/map01100+K00012+K01135+K00472+K13997+K01115+K00710+K05607+K05605+K00803+K01899+K05290	no
Glycosphingolipid biosynthesis - lacto and neolacto series	map00601	0	28	73	8903	1	1	-	.	0	.	0	http://www.kegg.jp/pathway/map00601+	no
Glycosphingolipid biosynthesis - globo and isoglobo series	map00603	0	18	73	8913	1	1	-	.	0	.	0	http://www.kegg.jp/pathway/map00603+	no
Porphyrin and chlorophyll metabolism	map00860	0	94	73	8837	1	1	-	.	0	.	0	http://www.kegg.jp/pathway/map00860+	no
RNA polymerase	map03020	0	30	73	8901	1	1	-	.	0	.	0	http://www.kegg.jp/pathway/map03020+	no
Basal transcription factors	map03022	1	58	72	8873	0.382362	1	gene13627|K03128	.	0	gene13627|K03128	1	http://www.kegg.jp/pathway/map03022+K03128	no
Proximal tubule bicarbonate reclamation	map04964	0	27	73	8904	1	1	-	.	0	.	0	http://www.kegg.jp/pathway/map04964+	no
Intestinal immune network for IgA production	map04672	0	42	73	8889	1	1	-	.	0	.	0	http://www.kegg.jp/pathway/map04672+	no
Collecting duct acid secretion	map04966	0	28	73	8903	1	1	-	.	0	.	0	http://www.kegg.jp/pathway/map04966+	no
2-Oxocarboxylic acid metabolism	map01210	0	21	73	8910	1	1	-	.	0	.	0	http://www.kegg.jp/pathway/map01210+	no
Adipocytokine signaling pathway	map04920	0	72	73	8859	1	1	-	.	0	.	0	http://www.kegg.jp/pathway/map04920+	no
Retinol metabolism	map00830	0	71	73	8860	1	1	-	.	0	.	0	http://www.kegg.jp/pathway/map00830+	no
Amyotrophic lateral sclerosis (ALS)	map05014	0	67	73	8864	1	1	-	.	0	.	0	http://www.kegg.jp/pathway/map05014+	no
Amino sugar and nucleotide sugar metabolism	map00520	1	54	72	8877	0.361787	1	gene10611|K00012	gene10611|K00012	1	.	0	http://www.kegg.jp/pathway/map00520+K00012	no
VEGF signaling pathway	map04370	1	54	72	8877	0.361787	1	gene20228|K02649	.	0	gene20228|K02649	1	http://www.kegg.jp/pathway/map04370+K02649	no
Valine, leucine and isoleucine biosynthesis	map00290	0	3	73	8928	1	1	-	.	0	.	0	http://www.kegg.jp/pathway/map00290+	no
Polyketide sugar unit biosynthesis	map00523	0	1	73	8930	1	1	-	.	0	.	0	http://www.kegg.jp/pathway/map00523+	no
ABC transporters	map02010	0	87	73	8844	1	1	-	.	0	.	0	http://www.kegg.jp/pathway/map02010+	no
Galactose metabolism	map00052	0	31	73	8900	1	1	-	.	0	.	0	http://www.kegg.jp/pathway/map00052+	no
Tryptophan metabolism	map00380	0	52	73	8879	1	1	-	.	0	.	0	http://www.kegg.jp/pathway/map00380+	no
Circadian rhythm - fly	map04711	0	10	73	8921	1	1	-	.	0	.	0	http://www.kegg.jp/pathway/map04711+	no
Circadian rhythm	map04710	0	42	73	8889	1	1	-	.	0	.	0	http://www.kegg.jp/pathway/map04710+	no
Fructose and mannose metabolism	map00051	0	27	73	8904	1	1	-	.	0	.	0	http://www.kegg.jp/pathway/map00051+	no
Neuroactive ligand-receptor interaction	map04080	2	273	71	8658	0.658335	1	gene10097|K05181;gene16590|K04237	gene10097|K05181;gene16590|K04237	2	.	0	http://www.kegg.jp/pathway/map04080+K05181+K04237	no
Linoleic acid metabolism	map00591	0	35	73	8896	1	1	-	.	0	.	0	http://www.kegg.jp/pathway/map00591+	no
Arachidonic acid metabolism	map00590	0	71	73	8860	1	1	-	.	0	.	0	http://www.kegg.jp/pathway/map00590+	no
alpha-Linolenic acid metabolism	map00592	0	29	73	8902	1	1	-	.	0	.	0	http://www.kegg.jp/pathway/map00592+	no
Maturity onset diabetes of the young	map04950	0	22	73	8909	1	1	-	.	0	.	0	http://www.kegg.jp/pathway/map04950+	no
Drug metabolism - cytochrome P450	map00982	0	80	73	8851	1	1	-	.	0	.	0	http://www.kegg.jp/pathway/map00982+	no
Tyrosine metabolism	map00350	0	43	73	8888	1	1	-	.	0	.	0	http://www.kegg.jp/pathway/map00350+	no
Oxidative phosphorylation	map00190	0	198	73	8733	1	1	-	.	0	.	0	http://www.kegg.jp/pathway/map00190+	no
Autophagy	map04140	0	35	73	8896	1	1	-	.	0	.	0	http://www.kegg.jp/pathway/map04140+	no
Other types of O-glycan biosynthesis	map00514	0	36	73	8895	1	1	-	.	0	.	0	http://www.kegg.jp/pathway/map00514+	no
Lipoic acid metabolism	map00785	0	3	73	8928	1	1	-	.	0	.	0	http://www.kegg.jp/pathway/map00785+	no
Biotin metabolism	map00780	0	4	73	8927	1	1	-	.	0	.	0	http://www.kegg.jp/pathway/map00780+	no
Prolactin signaling pathway	map04917	1	75	72	8856	0.462746	1	gene20228|K02649	.	0	gene20228|K02649	1	http://www.kegg.jp/pathway/map04917+K02649	no
Glycosphingolipid biosynthesis - ganglio series	map00604	0	17	73	8914	1	1	-	.	0	.	0	http://www.kegg.jp/pathway/map00604+	no
Insulin secretion	map04911	1	85	72	8846	0.505113	1	gene3389|K04634	.	0	gene3389|K04634	1	http://www.kegg.jp/pathway/map04911+K04634	no
Insulin signaling pathway	map04910	2	167	71	8764	0.399546	1	gene20228|K02649;gene8419|K04365	.	0	gene20228|K02649;gene8419|K04365	2	http://www.kegg.jp/pathway/map04910+K02649+K04365	no
Ovarian steroidogenesis	map04913	0	55	73	8876	1	1	-	.	0	.	0	http://www.kegg.jp/pathway/map04913+	no
Steroid hormone biosynthesis	map00140	0	62	73	8869	1	1	-	.	0	.	0	http://www.kegg.jp/pathway/map00140+	no
Melanogenesis	map04916	1	102	72	8829	0.569704	1	gene3389|K04634	.	0	gene3389|K04634	1	http://www.kegg.jp/pathway/map04916+K04634	no
Adherens junction	map04520	1	79	72	8852	0.480106	1	gene16590|K04237	gene16590|K04237	1	.	0	http://www.kegg.jp/pathway/map04520+K04237	no
Thyroid hormone synthesis	map04918	1	69	72	8862	0.435628	1	gene3389|K04634	.	0	gene3389|K04634	1	http://www.kegg.jp/pathway/map04918+K04634	no
Non-homologous end-joining	map03450	0	15	73	8916	1	1	-	.	0	.	0	http://www.kegg.jp/pathway/map03450+	no
Dorso-ventral axis formation	map04320	0	33	73	8898	1	1	-	.	0	.	0	http://www.kegg.jp/pathway/map04320+	no
PPAR signaling pathway	map03320	0	69	73	8862	1	1	-	.	0	.	0	http://www.kegg.jp/pathway/map03320+	no
B cell receptor signaling pathway	map04662	1	69	72	8862	0.435628	1	gene20228|K02649	.	0	gene20228|K02649	1	http://www.kegg.jp/pathway/map04662+K02649	no
Fc epsilon RI signaling pathway	map04664	1	66	72	8865	0.421568	1	gene20228|K02649	.	0	gene20228|K02649	1	http://www.kegg.jp/pathway/map04664+K02649	no
Phototransduction	map04744	0	25	73	8906	1	1	-	.	0	.	0	http://www.kegg.jp/pathway/map04744+	no
Olfactory transduction	map04740	0	1246	73	7685	1	1	-	.	0	.	0	http://www.kegg.jp/pathway/map04740+	no
Taste transduction	map04742	0	29	73	8902	1	1	-	.	0	.	0	http://www.kegg.jp/pathway/map04742+	no
Primary immunodeficiency	map05340	0	34	73	8897	1	1	-	.	0	.	0	http://www.kegg.jp/pathway/map05340+	no
Lysine biosynthesis	map00300	0	4	73	8927	1	1	-	.	0	.	0	http://www.kegg.jp/pathway/map00300+	no
p53 signaling pathway	map04115	1	105	72	8826	0.580206	1	gene19007|K04728	.	0	gene19007|K04728	1	http://www.kegg.jp/pathway/map04115+K04728	no
Vasopressin-regulated water reabsorption	map04962	0	54	73	8877	1	1	-	.	0	.	0	http://www.kegg.jp/pathway/map04962+	no
Purine metabolism	map00230	0	185	73	8746	1	1	-	.	0	.	0	http://www.kegg.jp/pathway/map00230+	no
Caffeine metabolism	map00232	0	4	73	8927	1	1	-	.	0	.	0	http://www.kegg.jp/pathway/map00232+	no
Pentose phosphate pathway	map00030	0	39	73	8892	1	1	-	.	0	.	0	http://www.kegg.jp/pathway/map00030+	no
Pyruvate metabolism	map00620	0	50	73	8881	1	1	-	.	0	.	0	http://www.kegg.jp/pathway/map00620+	no
Spliceosome	map03040	0	246	73	8685	1	1	-	.	0	.	0	http://www.kegg.jp/pathway/map03040+	no
Ubiquinone and other terpenoid-quinone biosynthesis	map00130	0	12	73	8919	1	1	-	.	0	.	0	http://www.kegg.jp/pathway/map00130+	no
ECM-receptor interaction	map04512	1	81	72	8850	0.488577	1	gene3853|K06487	.	0	gene3853|K06487	1	http://www.kegg.jp/pathway/map04512+K06487	no
Thiamine metabolism	map00730	0	4	73	8927	1	1	-	.	0	.	0	http://www.kegg.jp/pathway/map00730+	no
TGF-beta signaling pathway	map04350	1	87	72	8844	0.513183	1	gene10124|K04679	.	0	gene10124|K04679	1	http://www.kegg.jp/pathway/map04350+K04679	no
Neomycin, kanamycin and gentamicin biosynthesis	map00524	0	6	73	8925	1	1	-	.	0	.	0	http://www.kegg.jp/pathway/map00524+	no
Riboflavin metabolism	map00740	0	13	73	8918	1	1	-	.	0	.	0	http://www.kegg.jp/pathway/map00740+	no
NF-kappa B signaling pathway	map04064	1	93	72	8838	0.53662	1	gene19007|K04728	.	0	gene19007|K04728	1	http://www.kegg.jp/pathway/map04064+K04728	no
HIF-1 signaling pathway	map04066	1	139	72	8792	0.682921	1	gene20228|K02649	.	0	gene20228|K02649	1	http://www.kegg.jp/pathway/map04066+K02649	no
Cytokine-cytokine receptor interaction	map04060	1	224	72	8707	0.84353	1	gene13862|K05092	.	0	gene13862|K05092	1	http://www.kegg.jp/pathway/map04060+K05092	no
Mismatch repair	map03430	0	25	73	8906	1	1	-	.	0	.	0	http://www.kegg.jp/pathway/map03430+	no
Vitamin B6 metabolism	map00750	0	11	73	8920	1	1	-	.	0	.	0	http://www.kegg.jp/pathway/map00750+	no
Arginine and proline metabolism	map00330	1	74	72	8857	0.458317	1	gene19644|K00472	.	0	gene19644|K00472	1	http://www.kegg.jp/pathway/map00330+K00472	no
Basal cell carcinoma	map05217	0	58	73	8873	1	1	-	.	0	.	0	http://www.kegg.jp/pathway/map05217+	no

## Sheet: WW_F_H_WW_L_H
Name	Map	Count1	Count2	Count3	Count4	p	q	Gene_in_DE	Up_Gene	Up_Count	Down_Gene	Down_Count	Links	Result
Ubiquitin mediated proteolysis	map04120	9	186	85	8724	0.00018937	0.051698	gene10499|K10614;gene11787|K10594;gene13472|K10593;gene14244|K10608;gene20142|K03362;gene25348|K16063;gene2702|K04555;gene28104|K10609;gene9791|K03355	gene11787|K10594;gene2702|K04555	2	gene10499|K10614;gene13472|K10593;gene14244|K10608;gene20142|K03362;gene25348|K16063;gene28104|K10609;gene9791|K03355	7	http://www.kegg.jp/pathway/map04120+K10614+K10594+K10593+K10608+K03362+K16063+K04555+K10609+K03355	no
Endocytosis	map04144	9	209	85	8701	0.000433026	0.0591081	gene10124|K04679;gene12205|K13377;gene14585|K12480;gene15932|K01528;gene2125|K12489;gene21350|K05087;gene25469|K12196;gene27118|K12494;gene5304|K12488	gene15932|K01528;gene2125|K12489;gene21350|K05087;gene25469|K12196	4	gene10124|K04679;gene12205|K13377;gene14585|K12480;gene27118|K12494;gene5304|K12488	5	http://www.kegg.jp/pathway/map04144+K04679+K13377+K12480+K01528+K12489+K05087+K12196+K12494+K12488	no
Lysine degradation	map00310	5	81	89	8829	0.00199339	0.181398	gene10392|K00022;gene11072|K11424;gene22590|K11423;gene27059|K11425;gene8252|K14157	gene10392|K00022;gene11072|K11424;gene22590|K11423;gene8252|K14157	4	gene27059|K11425	1	http://www.kegg.jp/pathway/map00310+K00022+K11424+K11423+K11425+K14157	no
Dopaminergic synapse	map04728	6	132	88	8778	0.00313843	0.214198	gene21972|K11584;gene3389|K04634;gene3953|K04450;gene4028|K04833;gene4136|K10396;gene7914|K04630	gene21972|K11584;gene3953|K04450;gene4136|K10396;gene7914|K04630	4	gene3389|K04634;gene4028|K04833	2	http://www.kegg.jp/pathway/map04728+K11584+K04634+K04450+K04833+K10396+K04630	no
Pancreatic secretion	map04972	5	100	89	8810	0.0047339	0.258471	gene10807|K13575;gene25401|K07886;gene26499|K04962;gene26700|K04936;gene3389|K04634	gene26700|K04936	1	gene10807|K13575;gene25401|K07886;gene26499|K04962;gene3389|K04634	4	http://www.kegg.jp/pathway/map04972+K13575+K07886+K04962+K04936+K04634	no
Insulin secretion	map04911	4	82	90	8828	0.0123331	0.533171	gene26499|K04962;gene26700|K04936;gene3389|K04634;gene3953|K04450	gene26700|K04936;gene3953|K04450	2	gene26499|K04962;gene3389|K04634	2	http://www.kegg.jp/pathway/map04911+K04962+K04936+K04634+K04450	no
Valine, leucine and isoleucine degradation	map00280	3	53	91	8857	0.0205042	0.533171	gene10392|K00022;gene20370|K01027;gene3042|K05607	gene10392|K00022	1	gene20370|K01027;gene3042|K05607	2	http://www.kegg.jp/pathway/map00280+K00022+K01027+K05607	no
Long-term depression	map04730	3	54	91	8856	0.0214831	0.533171	gene21350|K05087;gene3389|K04634;gene7914|K04630	gene21350|K05087;gene7914|K04630	2	gene3389|K04634	1	http://www.kegg.jp/pathway/map04730+K05087+K04634+K04630	no
Retrograde endocannabinoid signaling	map04723	4	97	90	8813	0.0210838	0.533171	gene21326|K05186;gene27944|K05175;gene3389|K04634;gene7914|K04630	gene27944|K05175;gene7914|K04630	2	gene21326|K05186;gene3389|K04634	2	http://www.kegg.jp/pathway/map04723+K05186+K05175+K04634+K04630	no
Estrogen signaling pathway	map04915	4	95	90	8815	0.0197452	0.533171	gene11746|K03099;gene3389|K04634;gene3953|K04450;gene7914|K04630	gene11746|K03099;gene3953|K04450;gene7914|K04630	3	gene11746|K03099;gene3389|K04634	2	http://www.kegg.jp/pathway/map04915+K03099+K04634+K04450+K04630	no
Gap junction	map04540	4	90	90	8820	0.0166338	0.533171	gene11746|K03099;gene2928|K04289;gene3389|K04634;gene7914|K04630	gene11746|K03099;gene2928|K04289;gene7914|K04630	3	gene11746|K03099;gene3389|K04634	2	http://www.kegg.jp/pathway/map04540+K03099+K04289+K04634+K04630	no
Phototransduction - fly	map04745	2	26	92	8884	0.0341857	0.765932	gene27300|K13807;gene3389|K04634	.	0	gene27300|K13807;gene3389|K04634	2	http://www.kegg.jp/pathway/map04745+K13807+K04634	no
Fatty acid elongation	map00062	2	27	92	8883	0.036473	0.765932	gene10392|K00022;gene12337|K10249	gene10392|K00022	1	gene12337|K10249	1	http://www.kegg.jp/pathway/map00062+K00022+K10249	no
Cell adhesion molecules (CAMs)	map04514	4	129	90	8781	0.0501639	0.778856	gene10153|K06793;gene12241|K07377;gene1940|K06592;gene6559|K06759	gene10153|K06793;gene6559|K06759	2	gene12241|K07377;gene1940|K06592	2	http://www.kegg.jp/pathway/map04514+K06793+K07377+K06592+K06759	no
Renal cell carcinoma	map05211	3	74	91	8836	0.0463278	0.778856	gene11746|K03099;gene12205|K13377;gene23885|K04409	gene11746|K03099	1	gene11746|K03099;gene12205|K13377;gene23885|K04409	3	http://www.kegg.jp/pathway/map05211+K03099+K13377+K04409	no
Mucin type O-glycan biosynthesis	map00512	2	33	92	8877	0.0513531	0.778856	gene25166|K00710;gene8631|K00710	gene8631|K00710	1	gene25166|K00710	1	http://www.kegg.jp/pathway/map00512+K00710+K00710	no
Morphine addiction	map05032	3	75	91	8835	0.047828	0.778856	gene21326|K05186;gene27944|K05175;gene7914|K04630	gene27944|K05175;gene7914|K04630	2	gene21326|K05186	1	http://www.kegg.jp/pathway/map05032+K05186+K05175+K04630	no
MAPK signaling pathway	map04010	6	246	88	8664	0.0478771	0.778856	gene11746|K03099;gene12205|K13377;gene23885|K04409;gene2525|K08053;gene3953|K04450;gene6571|K04458	gene11746|K03099;gene2525|K08053;gene3953|K04450;gene6571|K04458	4	gene11746|K03099;gene12205|K13377;gene23885|K04409	3	http://www.kegg.jp/pathway/map04010+K03099+K13377+K04409+K08053+K04450+K04458	no
Oocyte meiosis	map04114	4	144	90	8766	0.0688395	0.783049	gene20142|K03362;gene21350|K05087;gene21972|K11584;gene9791|K03355	gene21350|K05087;gene21972|K11584	2	gene20142|K03362;gene9791|K03355	2	http://www.kegg.jp/pathway/map04114+K03362+K05087+K11584+K03355	no
Focal adhesion	map04510	5	195	89	8715	0.0578505	0.783049	gene11746|K03099;gene21350|K05087;gene21699|K13709;gene23885|K04409;gene25010|K13708	gene11746|K03099;gene21350|K05087;gene21699|K13709	3	gene11746|K03099;gene23885|K04409;gene25010|K13708	3	http://www.kegg.jp/pathway/map04510+K03099+K05087+K13709+K04409+K13708	no
GABAergic synapse	map04727	3	85	91	8825	0.0641136	0.783049	gene21326|K05186;gene27944|K05175;gene7914|K04630	gene27944|K05175;gene7914|K04630	2	gene21326|K05186	1	http://www.kegg.jp/pathway/map04727+K05186+K05175+K04630	no
Hepatitis C	map05160	4	142	90	8768	0.0661662	0.783049	gene11640|K16196;gene11746|K03099;gene5660|K08860;gene569|K11217	gene11746|K03099;gene5660|K08860	2	gene11640|K16196;gene11746|K03099;gene569|K11217	3	http://www.kegg.jp/pathway/map05160+K16196+K03099+K08860+K11217	no
Nicotine addiction	map05033	2	39	92	8871	0.0680075	0.783049	gene21326|K05186;gene27944|K05175	gene27944|K05175	1	gene21326|K05186	1	http://www.kegg.jp/pathway/map05033+K05186+K05175	no
Butanoate metabolism	map00650	2	35	92	8875	0.0567212	0.783049	gene10392|K00022;gene20370|K01027	gene10392|K00022	1	gene20370|K01027	1	http://www.kegg.jp/pathway/map00650+K00022+K01027	no
Circadian entrainment	map04713	3	93	91	8817	0.0787459	0.859906	gene26499|K04962;gene3389|K04634;gene7914|K04630	gene7914|K04630	1	gene26499|K04962;gene3389|K04634	2	http://www.kegg.jp/pathway/map04713+K04962+K04634+K04630	no
Protein processing in endoplasmic reticulum	map04141	5	218	89	8692	0.083503	0.876782	gene11640|K16196;gene14052|K11718;gene2702|K04555;gene3795|K11718;gene5660|K08860	gene2702|K04555;gene3795|K11718;gene5660|K08860	3	gene11640|K16196;gene14052|K11718	2	http://www.kegg.jp/pathway/map04141+K16196+K11718+K04555+K11718+K08860	no
T cell receptor signaling pathway	map04660	3	99	91	8811	0.0905923	0.883275	gene11746|K03099;gene2120|K12076;gene23885|K04409	gene11746|K03099	1	gene11746|K03099;gene2120|K12076;gene23885|K04409	3	http://www.kegg.jp/pathway/map04660+K03099+K12076+K04409	no
Endocrine and other factor-regulated calcium reabsorption	map04961	2	46	92	8864	0.0893249	0.883275	gene15932|K01528;gene3389|K04634	gene15932|K01528	1	gene3389|K04634	1	http://www.kegg.jp/pathway/map04961+K01528+K04634	no
Progesterone-mediated oocyte maturation	map04914	3	104	91	8806	0.100999	0.889442	gene21350|K05087;gene7914|K04630;gene9791|K03355	gene21350|K05087;gene7914|K04630	2	gene9791|K03355	1	http://www.kegg.jp/pathway/map04914+K05087+K04630+K03355	no
PI3K-Akt signaling pathway	map04151	7	369	87	8541	0.0974818	0.889442	gene11746|K03099;gene21350|K05087;gene21972|K11584;gene2928|K04289;gene3640|K05121;gene3953|K04450;gene569|K11217	gene11746|K03099;gene21350|K05087;gene21972|K11584;gene2928|K04289;gene3640|K05121;gene3953|K04450	6	gene11746|K03099;gene569|K11217	2	http://www.kegg.jp/pathway/map04151+K03099+K05087+K11584+K04289+K05121+K04450+K11217	no
Cocaine addiction	map05030	2	49	92	8861	0.0989933	0.889442	gene3953|K04450;gene7914|K04630	gene3953|K04450;gene7914|K04630	2	.	0	http://www.kegg.jp/pathway/map05030+K04450+K04630	no
Regulation of actin cytoskeleton	map04810	4	242	90	8668	0.255245	0.893046	gene11746|K03099;gene23885|K04409;gene25010|K13708;gene3770|K05749	gene11746|K03099;gene3770|K05749	2	gene11746|K03099;gene23885|K04409;gene25010|K13708	3	http://www.kegg.jp/pathway/map04810+K03099+K04409+K13708+K05749	no
Cell cycle	map04110	3	167	91	8743	0.261698	0.893046	gene12205|K13377;gene2518|K09392;gene9791|K03355	.	0	gene12205|K13377;gene2518|K09392;gene9791|K03355	3	http://www.kegg.jp/pathway/map04110+K13377+K09392+K03355	no
Hypertrophic cardiomyopathy (HCM)	map05410	2	83	92	8827	0.222466	0.893046	gene12205|K13377;gene26499|K04962	.	0	gene12205|K13377;gene26499|K04962	2	http://www.kegg.jp/pathway/map05410+K13377+K04962	no
Synthesis and degradation of ketone bodies	map00072	1	13	93	8897	0.136734	0.893046	gene20370|K01027	.	0	gene20370|K01027	1	http://www.kegg.jp/pathway/map00072+K01027	no
Proximal tubule bicarbonate reclamation	map04964	1	26	93	8884	0.247059	0.893046	gene10807|K13575	.	0	gene10807|K13575	1	http://www.kegg.jp/pathway/map04964+K13575	no
Glutamatergic synapse	map04724	3	111	91	8799	0.116329	0.893046	gene22256|K04608;gene3389|K04634;gene7914|K04630	gene22256|K04608;gene7914|K04630	2	gene3389|K04634	1	http://www.kegg.jp/pathway/map04724+K04608+K04634+K04630	no
mRNA surveillance pathway	map03015	3	144	91	8766	0.198268	0.893046	gene10688|K14405;gene19745|K14408;gene21972|K11584	gene10688|K14405;gene21972|K11584	2	gene19745|K14408	1	http://www.kegg.jp/pathway/map03015+K14405+K14408+K11584	no
RNA degradation	map03018	2	80	92	8830	0.210946	0.893046	gene13861|K12572;gene8669|K12603	gene13861|K12572	1	gene8669|K12603	1	http://www.kegg.jp/pathway/map03018+K12572+K12603	no
Prostate cancer	map05215	2	85	92	8825	0.230176	0.893046	gene11746|K03099;gene21350|K05087	gene11746|K03099;gene21350|K05087	2	gene11746|K03099	1	http://www.kegg.jp/pathway/map05215+K03099+K05087	no
Glioma	map05214	2	62	92	8848	0.143787	0.893046	gene11746|K03099;gene21350|K05087	gene11746|K03099;gene21350|K05087	2	gene11746|K03099	1	http://www.kegg.jp/pathway/map05214+K03099+K05087	no
Pancreatic cancer	map05212	2	78	92	8832	0.203301	0.893046	gene12205|K13377;gene569|K11217	.	0	gene12205|K13377;gene569|K11217	2	http://www.kegg.jp/pathway/map05212+K13377+K11217	no
Colorectal cancer	map05210	2	87	92	8823	0.237904	0.893046	gene12205|K13377;gene5800|K08735	.	0	gene12205|K13377;gene5800|K08735	2	http://www.kegg.jp/pathway/map05210+K13377+K08735	no
N-Glycan biosynthesis	map00510	2	61	92	8849	0.140202	0.893046	gene17421|K00721;gene22409|K06316	gene17421|K00721;gene22409|K06316	2	.	0	http://www.kegg.jp/pathway/map00510+K00721+K06316	no
Glycosphingolipid biosynthesis - lacto and neolacto series	map00601	1	27	93	8883	0.254943	0.893046	gene1864|K03792	gene1864|K03792	1	.	0	http://www.kegg.jp/pathway/map00601+K03792	no
Dilated cardiomyopathy	map05414	2	85	92	8825	0.230176	0.893046	gene12205|K13377;gene26499|K04962	.	0	gene12205|K13377;gene26499|K04962	2	http://www.kegg.jp/pathway/map05414+K13377+K04962	no
Gastric acid secretion	map04971	2	74	92	8836	0.188118	0.893046	gene3389|K04634;gene7914|K04630	gene7914|K04630	1	gene3389|K04634	1	http://www.kegg.jp/pathway/map04971+K04634+K04630	no
Salivary secretion	map04970	2	92	92	8818	0.257278	0.893046	gene26700|K04936;gene3389|K04634	gene26700|K04936	1	gene3389|K04634	1	http://www.kegg.jp/pathway/map04970+K04936+K04634	no
Vitamin digestion and absorption	map04977	1	24	93	8886	0.231042	0.893046	gene23803|K14592	.	0	gene23803|K14592	1	http://www.kegg.jp/pathway/map04977+K14592	no
Toxoplasmosis	map05145	3	130	91	8780	0.161828	0.893046	gene12205|K13377;gene569|K11217;gene7914|K04630	gene7914|K04630	1	gene12205|K13377;gene569|K11217	2	http://www.kegg.jp/pathway/map05145+K13377+K11217+K04630	no
Axon guidance	map04360	3	134	91	8776	0.172023	0.893046	gene10742|K05106;gene23885|K04409;gene7914|K04630	gene7914|K04630	1	gene10742|K05106;gene23885|K04409	2	http://www.kegg.jp/pathway/map04360+K05106+K04409+K04630	no
Jak-STAT signaling pathway	map04630	3	167	91	8743	0.261698	0.893046	gene11746|K03099;gene25348|K16063;gene569|K11217	gene11746|K03099	1	gene11746|K03099;gene25348|K16063;gene569|K11217	3	http://www.kegg.jp/pathway/map04630+K03099+K16063+K11217	no
Rheumatoid arthritis	map05323	2	90	92	8820	0.249521	0.893046	gene12205|K13377;gene3640|K05121	gene3640|K05121	1	gene12205|K13377	1	http://www.kegg.jp/pathway/map05323+K13377+K05121	no
Pathways in cancer	map05200	6	376	88	8534	0.208644	0.893046	gene11746|K03099;gene12205|K13377;gene21350|K05087;gene25348|K16063;gene569|K11217;gene5800|K08735	gene11746|K03099;gene21350|K05087	2	gene11746|K03099;gene12205|K13377;gene25348|K16063;gene569|K11217;gene5800|K08735	5	http://www.kegg.jp/pathway/map05200+K03099+K13377+K05087+K16063+K11217+K08735	no
Viral carcinogenesis	map05203	4	244	90	8666	0.259843	0.893046	gene2120|K12076;gene2525|K08053;gene3953|K04450;gene569|K11217	gene2525|K08053;gene3953|K04450	2	gene2120|K12076;gene569|K11217	2	http://www.kegg.jp/pathway/map05203+K12076+K08053+K04450+K11217	no
Bacterial invasion of epithelial cells	map05100	2	92	92	8818	0.257278	0.893046	gene15932|K01528;gene25010|K13708	gene15932|K01528	1	gene25010|K13708	1	http://www.kegg.jp/pathway/map05100+K01528+K13708	no
Influenza A	map05164	4	185	90	8725	0.135122	0.893046	gene11640|K16196;gene3953|K04450;gene5660|K08860;gene569|K11217	gene3953|K04450;gene5660|K08860	2	gene11640|K16196;gene569|K11217	2	http://www.kegg.jp/pathway/map05164+K16196+K04450+K08860+K11217	no
Mismatch repair	map03430	1	24	93	8886	0.231042	0.893046	gene5800|K08735	.	0	gene5800|K08735	1	http://www.kegg.jp/pathway/map03430+K08735	no
Selenocompound metabolism	map00450	1	26	93	8884	0.247059	0.893046	gene6946|K00384	.	0	gene6946|K00384	1	http://www.kegg.jp/pathway/map00450+K00384	no
Adherens junction	map04520	2	78	92	8832	0.203301	0.893046	gene1940|K06592;gene21350|K05087	gene21350|K05087	1	gene1940|K06592	1	http://www.kegg.jp/pathway/map04520+K06592+K05087	no
Thyroid hormone synthesis	map04918	2	68	92	8842	0.165683	0.893046	gene3389|K04634;gene3953|K04450	gene3953|K04450	1	gene3389|K04634	1	http://www.kegg.jp/pathway/map04918+K04634+K04450	no
Glycosaminoglycan degradation	map00531	1	21	93	8889	0.206383	0.893046	gene11193|K01135	.	0	gene11193|K01135	1	http://www.kegg.jp/pathway/map00531+K01135	no
GnRH signaling pathway	map04912	2	86	92	8824	0.234038	0.893046	gene11746|K03099;gene3389|K04634	gene11746|K03099	1	gene11746|K03099;gene3389|K04634	2	http://www.kegg.jp/pathway/map04912+K03099+K04634	no
Insulin signaling pathway	map04910	3	166	91	8744	0.258877	0.893046	gene11746|K03099;gene17661|K07190;gene27730|K07190	gene11746|K03099;gene27730|K07190	2	gene11746|K03099;gene17661|K07190	2	http://www.kegg.jp/pathway/map04910+K03099+K07190+K07190	no
Chagas disease (American trypanosomiasis)	map05142	3	119	91	8791	0.134845	0.893046	gene12205|K13377;gene3389|K04634;gene7914|K04630	gene7914|K04630	1	gene12205|K13377;gene3389|K04634	2	http://www.kegg.jp/pathway/map05142+K13377+K04634+K04630	no
Leishmaniasis	map05140	2	63	92	8847	0.147393	0.893046	gene12205|K13377;gene569|K11217	.	0	gene12205|K13377;gene569|K11217	2	http://www.kegg.jp/pathway/map05140+K13377+K11217	no
Calcium signaling pathway	map04020	4	189	90	8721	0.14265	0.893046	gene17661|K07190;gene26499|K04962;gene27730|K07190;gene3389|K04634	gene27730|K07190	1	gene17661|K07190;gene26499|K04962;gene3389|K04634	3	http://www.kegg.jp/pathway/map04020+K07190+K04962+K07190+K04634	no
Synaptic vesicle cycle	map04721	2	70	92	8840	0.173109	0.893046	gene11857|K15293;gene15932|K01528	gene15932|K01528	1	gene11857|K15293	1	http://www.kegg.jp/pathway/map04721+K15293+K01528	no
Chronic myeloid leukemia	map05220	2	79	92	8831	0.207119	0.893046	gene11746|K03099;gene12205|K13377	gene11746|K03099	1	gene11746|K03099;gene12205|K13377	2	http://www.kegg.jp/pathway/map05220+K03099+K13377	no
Peroxisome	map04146	2	84	92	8826	0.226319	0.893046	gene12758|K13336;gene3920|K00803	gene12758|K13336	1	gene3920|K00803	1	http://www.kegg.jp/pathway/map04146+K13336+K00803	no
TGF-beta signaling pathway	map04350	2	86	92	8824	0.234038	0.893046	gene10124|K04679;gene12205|K13377	.	0	gene10124|K04679;gene12205|K13377	2	http://www.kegg.jp/pathway/map04350+K04679+K13377	no
MAPK signaling pathway - fly	map04013	1	17	93	8893	0.172283	0.893046	gene11746|K03099	gene11746|K03099	1	gene11746|K03099	1	http://www.kegg.jp/pathway/map04013+K03099	no
HTLV-I infection	map05166	5	303	89	8607	0.218885	0.893046	gene12205|K13377;gene2120|K12076;gene3953|K04450;gene569|K11217;gene9791|K03355	gene3953|K04450	1	gene12205|K13377;gene2120|K12076;gene569|K11217;gene9791|K03355	4	http://www.kegg.jp/pathway/map05166+K13377+K12076+K04450+K11217+K03355	no
Measles	map05162	3	136	91	8774	0.177189	0.893046	gene11640|K16196;gene5660|K08860;gene569|K11217	gene5660|K08860	1	gene11640|K16196;gene569|K11217	2	http://www.kegg.jp/pathway/map05162+K16196+K08860+K11217	no
Epstein-Barr virus infection	map05169	4	216	90	8694	0.19742	0.893046	gene11640|K16196;gene3953|K04450;gene5660|K08860;gene569|K11217	gene3953|K04450;gene5660|K08860	2	gene11640|K16196;gene569|K11217	2	http://www.kegg.jp/pathway/map05169+K16196+K04450+K08860+K11217	no
Neuroactive ligand-receptor interaction	map04080	5	270	89	8640	0.159716	0.893046	gene21326|K05186;gene22256|K04608;gene27944|K05175;gene2928|K04289;gene7752|K04576	gene22256|K04608;gene27944|K05175;gene2928|K04289;gene7752|K04576	4	gene21326|K05186	1	http://www.kegg.jp/pathway/map04080+K05186+K04608+K05175+K04289+K04576	no
Hippo signaling pathway - fly	map04391	2	82	92	8828	0.21862	0.893046	gene16409|K16681;gene2120|K12076	gene16409|K16681	1	gene2120|K12076	1	http://www.kegg.jp/pathway/map04391+K16681+K12076	no
Hippo signaling pathway	map04390	4	171	90	8739	0.110162	0.893046	gene12205|K13377;gene16409|K16681;gene20142|K03362;gene2120|K12076	gene16409|K16681	1	gene12205|K13377;gene20142|K03362;gene2120|K12076	3	http://www.kegg.jp/pathway/map04390+K13377+K16681+K03362+K12076	no
Wnt signaling pathway	map04310	3	151	91	8759	0.21719	0.893046	gene15996|K04493;gene20142|K03362;gene27199|K04508	gene15996|K04493;gene27199|K04508	2	gene20142|K03362	1	http://www.kegg.jp/pathway/map04310+K04493+K03362+K04508	no
ErbB signaling pathway	map04012	2	80	92	8830	0.210946	0.893046	gene11746|K03099;gene23885|K04409	gene11746|K03099	1	gene11746|K03099;gene23885|K04409	2	http://www.kegg.jp/pathway/map04012+K03099+K04409	no
Chemokine signaling pathway	map04062	3	179	91	8731	0.29583	0.897351	gene11746|K03099;gene23885|K04409;gene7914|K04630	gene11746|K03099;gene7914|K04630	2	gene11746|K03099;gene23885|K04409	2	http://www.kegg.jp/pathway/map04062+K03099+K04409+K04630	no
Melanogenesis	map04916	2	101	92	8809	0.292194	0.897351	gene3389|K04634;gene7914|K04630	gene7914|K04630	1	gene3389|K04634	1	http://www.kegg.jp/pathway/map04916+K04634+K04630	no
Proteoglycans in cancer	map05205	4	247	90	8663	0.26677	0.897351	gene10351|K10380;gene11746|K03099;gene21350|K05087;gene23885|K04409	gene10351|K10380;gene11746|K03099;gene21350|K05087	3	gene11746|K03099;gene23885|K04409	2	http://www.kegg.jp/pathway/map05205+K10380+K03099+K05087+K04409	no
Transcriptional misregulation in cancer	map05202	3	174	91	8736	0.281556	0.897351	gene11072|K11424;gene21350|K05087;gene26558|K11449	gene11072|K11424;gene21350|K05087	2	gene26558|K11449	1	http://www.kegg.jp/pathway/map05202+K11424+K05087+K11449	no
Nitrogen metabolism	map00910	1	30	93	8880	0.278109	0.897351	gene13266|K01672	gene13266|K01672	1	.	0	http://www.kegg.jp/pathway/map00910+K01672	no
Alcoholism	map05034	3	174	91	8736	0.281556	0.897351	gene11746|K03099;gene3953|K04450;gene7914|K04630	gene11746|K03099;gene3953|K04450;gene7914|K04630	3	gene11746|K03099	1	http://www.kegg.jp/pathway/map05034+K03099+K04450+K04630	no
African trypanosomiasis	map05143	1	32	93	8878	0.293156	0.897351	gene3389|K04634	.	0	gene3389|K04634	1	http://www.kegg.jp/pathway/map05143+K04634	no
Amoebiasis	map05146	2	101	92	8809	0.292194	0.897351	gene12205|K13377;gene3389|K04634	.	0	gene12205|K13377;gene3389|K04634	2	http://www.kegg.jp/pathway/map05146+K13377+K04634	no
Hepatitis B	map05161	3	177	91	8733	0.290113	0.897351	gene12205|K13377;gene3953|K04450;gene569|K11217	gene3953|K04450	1	gene12205|K13377;gene569|K11217	2	http://www.kegg.jp/pathway/map05161+K13377+K04450+K11217	no
Dorso-ventral axis formation	map04320	1	32	93	8878	0.293156	0.897351	gene11746|K03099	gene11746|K03099	1	gene11746|K03099	1	http://www.kegg.jp/pathway/map04320+K03099	no
Fc gamma R-mediated phagocytosis	map04666	2	104	92	8806	0.303802	0.911407	gene23885|K04409;gene5304|K12488	.	0	gene23885|K04409;gene5304|K12488	2	http://www.kegg.jp/pathway/map04666+K04409+K12488	no
Cholinergic synapse	map04725	2	107	92	8803	0.315379	0.935853	gene3389|K04634;gene7914|K04630	gene7914|K04630	1	gene3389|K04634	1	http://www.kegg.jp/pathway/map04725+K04634+K04630	no
Pyrimidine metabolism	map00240	2	108	92	8802	0.319229	0.937093	gene27269|K01937;gene6946|K00384	gene27269|K01937	1	gene27269|K01937;gene6946|K00384	2	http://www.kegg.jp/pathway/map00240+K01937+K00384	no
Serotonergic synapse	map04726	2	110	92	8800	0.326915	0.949445	gene3389|K04634;gene7914|K04630	gene7914|K04630	1	gene3389|K04634	1	http://www.kegg.jp/pathway/map04726+K04634+K04630	no
TNF signaling pathway	map04668	2	112	92	8798	0.334579	0.961473	gene3953|K04450;gene7918|K05629	gene3953|K04450;gene7918|K05629	2	.	0	http://www.kegg.jp/pathway/map04668+K04450+K05629	no
Vascular smooth muscle contraction	map04270	2	116	92	8794	0.349831	0.994831	gene26700|K04936;gene3389|K04634	gene26700|K04936	1	gene3389|K04634	1	http://www.kegg.jp/pathway/map04270+K04936+K04634	no
Cysteine and methionine metabolism	map00270	0	48	94	8862	1	1	-	.	0	.	0	http://www.kegg.jp/pathway/map00270+	no
Pantothenate and CoA biosynthesis	map00770	0	18	94	8892	1	1	-	.	0	.	0	http://www.kegg.jp/pathway/map00770+	no
Phosphatidylinositol signaling system	map04070	0	82	94	8828	1	1	-	.	0	.	0	http://www.kegg.jp/pathway/map04070+	no
Protein export	map03060	0	22	94	8888	1	1	-	.	0	.	0	http://www.kegg.jp/pathway/map03060+	no
Renin-angiotensin system	map04614	0	18	94	8892	1	1	-	.	0	.	0	http://www.kegg.jp/pathway/map04614+	no
Viral myocarditis	map05416	0	75	94	8835	1	1	-	.	0	.	0	http://www.kegg.jp/pathway/map05416+	no
Complement and coagulation cascades	map04610	0	79	94	8831	1	1	-	.	0	.	0	http://www.kegg.jp/pathway/map04610+	no
Antigen processing and presentation	map04612	0	77	94	8833	1	1	-	.	0	.	0	http://www.kegg.jp/pathway/map04612+	no
Arrhythmogenic right ventricular cardiomyopathy (ARVC)	map05412	1	70	93	8840	0.526711	1	gene26499|K04962	.	0	gene26499|K04962	1	http://www.kegg.jp/pathway/map05412+K04962	no
Base excision repair	map03410	0	45	94	8865	1	1	-	.	0	.	0	http://www.kegg.jp/pathway/map03410+	no
Fanconi anemia pathway	map03460	0	54	94	8856	1	1	-	.	0	.	0	http://www.kegg.jp/pathway/map03460+	no
Non-homologous end-joining	map03450	0	15	94	8895	1	1	-	.	0	.	0	http://www.kegg.jp/pathway/map03450+	no
Fatty acid degradation	map00071	1	44	93	8866	0.377134	1	gene10392|K00022	gene10392|K00022	1	.	0	http://www.kegg.jp/pathway/map00071+K00022	no
Cardiac muscle contraction	map04260	1	92	93	8818	0.625084	1	gene26499|K04962	.	0	gene26499|K04962	1	http://www.kegg.jp/pathway/map04260+K04962	no
Taste transduction	map04742	0	29	94	8881	1	1	-	.	0	.	0	http://www.kegg.jp/pathway/map04742+	no
Ovarian steroidogenesis	map04913	1	54	93	8856	0.439516	1	gene21350|K05087	gene21350|K05087	1	.	0	http://www.kegg.jp/pathway/map04913+K05087	no
ECM-receptor interaction	map04512	0	82	94	8828	1	1	-	.	0	.	0	http://www.kegg.jp/pathway/map04512+	no
Carbohydrate digestion and absorption	map04973	0	47	94	8863	1	1	-	.	0	.	0	http://www.kegg.jp/pathway/map04973+	no
Hedgehog signaling pathway	map04340	1	54	93	8856	0.439516	1	gene20142|K03362	.	0	gene20142|K03362	1	http://www.kegg.jp/pathway/map04340+K03362	no
Primary immunodeficiency	map05340	0	34	94	8876	1	1	-	.	0	.	0	http://www.kegg.jp/pathway/map05340+	no
RNA transport	map03013	1	268	93	8642	0.943083	1	gene3770|K05749	gene3770|K05749	1	.	0	http://www.kegg.jp/pathway/map03013+K05749	no
Ribosome	map03010	1	771	93	8139	0.999791	1	gene10048|K02890	gene10048|K02890	1	.	0	http://www.kegg.jp/pathway/map03010+K02890	no
ABC transporters	map02010	0	87	94	8823	1	1	-	.	0	.	0	http://www.kegg.jp/pathway/map02010+	no
D-Glutamine and D-glutamate metabolism	map00471	0	6	94	8904	1	1	-	.	0	.	0	http://www.kegg.jp/pathway/map00471+	no
D-Arginine and D-ornithine metabolism	map00472	0	1	94	8909	1	1	-	.	0	.	0	http://www.kegg.jp/pathway/map00472+	no
Fructose and mannose metabolism	map00051	0	27	94	8883	1	1	-	.	0	.	0	http://www.kegg.jp/pathway/map00051+	no
Glycerophospholipid metabolism	map00564	0	99	94	8811	1	1	-	.	0	.	0	http://www.kegg.jp/pathway/map00564+	no
Ether lipid metabolism	map00565	1	46	93	8864	0.390137	1	gene3920|K00803	.	0	gene3920|K00803	1	http://www.kegg.jp/pathway/map00565+K00803	no
Type I diabetes mellitus	map04940	0	40	94	8870	1	1	-	.	0	.	0	http://www.kegg.jp/pathway/map04940+	no
Salmonella infection	map05132	0	106	94	8804	1	1	-	.	0	.	0	http://www.kegg.jp/pathway/map05132+	no
Glycerolipid metabolism	map00561	0	58	94	8852	1	1	-	.	0	.	0	http://www.kegg.jp/pathway/map00561+	no
NF-kappa B signaling pathway	map04064	0	94	94	8816	1	1	-	.	0	.	0	http://www.kegg.jp/pathway/map04064+	no
Olfactory transduction	map04740	0	1246	94	7664	1	1	-	.	0	.	0	http://www.kegg.jp/pathway/map04740+	no
Arginine and proline metabolism	map00330	0	75	94	8835	1	1	-	.	0	.	0	http://www.kegg.jp/pathway/map00330+	no
One carbon pool by folate	map00670	0	25	94	8885	1	1	-	.	0	.	0	http://www.kegg.jp/pathway/map00670+	no
NOD-like receptor signaling pathway	map04621	0	56	94	8854	1	1	-	.	0	.	0	http://www.kegg.jp/pathway/map04621+	no
Toll-like receptor signaling pathway	map04620	0	109	94	8801	1	1	-	.	0	.	0	http://www.kegg.jp/pathway/map04620+	no
Cytosolic DNA-sensing pathway	map04623	0	58	94	8852	1	1	-	.	0	.	0	http://www.kegg.jp/pathway/map04623+	no
RIG-I-like receptor signaling pathway	map04622	0	79	94	8831	1	1	-	.	0	.	0	http://www.kegg.jp/pathway/map04622+	no
Pentose and glucuronate interconversions	map00040	0	42	94	8868	1	1	-	.	0	.	0	http://www.kegg.jp/pathway/map00040+	no
VEGF signaling pathway	map04370	0	55	94	8855	1	1	-	.	0	.	0	http://www.kegg.jp/pathway/map04370+	no
Glycosphingolipid biosynthesis - ganglio series	map00604	0	17	94	8893	1	1	-	.	0	.	0	http://www.kegg.jp/pathway/map00604+	no
Basal cell carcinoma	map05217	0	58	94	8852	1	1	-	.	0	.	0	http://www.kegg.jp/pathway/map05217+	no
Thyroid cancer	map05216	0	36	94	8874	1	1	-	.	0	.	0	http://www.kegg.jp/pathway/map05216+	no
Endometrial cancer	map05213	1	56	93	8854	0.451229	1	gene11746|K03099	gene11746|K03099	1	gene11746|K03099	1	http://www.kegg.jp/pathway/map05213+K03099	no
Caffeine metabolism	map00232	0	4	94	8906	1	1	-	.	0	.	0	http://www.kegg.jp/pathway/map00232+	no
Bladder cancer	map05219	0	42	94	8868	1	1	-	.	0	.	0	http://www.kegg.jp/pathway/map05219+	no
Melanoma	map05218	1	69	93	8841	0.521678	1	gene21350|K05087	gene21350|K05087	1	.	0	http://www.kegg.jp/pathway/map05218+K05087	no
Other glycan degradation	map00511	0	28	94	8882	1	1	-	.	0	.	0	http://www.kegg.jp/pathway/map00511+	no
p53 signaling pathway	map04115	0	106	94	8804	1	1	-	.	0	.	0	http://www.kegg.jp/pathway/map04115+	no
Biosynthesis of unsaturated fatty acids	map01040	0	25	94	8885	1	1	-	.	0	.	0	http://www.kegg.jp/pathway/map01040+	no
Other types of O-glycan biosynthesis	map00514	0	36	94	8874	1	1	-	.	0	.	0	http://www.kegg.jp/pathway/map00514+	no
Carbon metabolism	map01200	0	121	94	8789	1	1	-	.	0	.	0	http://www.kegg.jp/pathway/map01200+	no
Sphingolipid metabolism	map00600	0	52	94	8858	1	1	-	.	0	.	0	http://www.kegg.jp/pathway/map00600+	no
Oxidative phosphorylation	map00190	1	197	93	8713	0.877683	1	gene10410|K01507	.	0	gene10410|K01507	1	http://www.kegg.jp/pathway/map00190+K01507	no
Mineral absorption	map04978	0	88	94	8822	1	1	-	.	0	.	0	http://www.kegg.jp/pathway/map04978+	no
Purine metabolism	map00230	0	185	94	8725	1	1	-	.	0	.	0	http://www.kegg.jp/pathway/map00230+	no
Nicotinate and nicotinamide metabolism	map00760	0	33	94	8877	1	1	-	.	0	.	0	http://www.kegg.jp/pathway/map00760+	no
SNARE interactions in vesicular transport	map04130	0	40	94	8870	1	1	-	.	0	.	0	http://www.kegg.jp/pathway/map04130+	no
Linoleic acid metabolism	map00591	0	35	94	8875	1	1	-	.	0	.	0	http://www.kegg.jp/pathway/map00591+	no
Arachidonic acid metabolism	map00590	0	71	94	8839	1	1	-	.	0	.	0	http://www.kegg.jp/pathway/map00590+	no
Fat digestion and absorption	map04975	0	57	94	8853	1	1	-	.	0	.	0	http://www.kegg.jp/pathway/map04975+	no
Protein digestion and absorption	map04974	0	82	94	8828	1	1	-	.	0	.	0	http://www.kegg.jp/pathway/map04974+	no
Malaria	map05144	1	51	93	8859	0.421481	1	gene12205|K13377	.	0	gene12205|K13377	1	http://www.kegg.jp/pathway/map05144+K13377	no
Cytokine-cytokine receptor interaction	map04060	1	224	93	8686	0.908492	1	gene12205|K13377	.	0	gene12205|K13377	1	http://www.kegg.jp/pathway/map04060+K13377	no
Tryptophan metabolism	map00380	1	51	93	8859	0.421481	1	gene10392|K00022	gene10392|K00022	1	.	0	http://www.kegg.jp/pathway/map00380+K00022	no
Inflammatory bowel disease (IBD)	map05321	1	54	93	8856	0.439516	1	gene12205|K13377	.	0	gene12205|K13377	1	http://www.kegg.jp/pathway/map05321+K13377	no
Autoimmune thyroid disease	map05320	0	46	94	8864	1	1	-	.	0	.	0	http://www.kegg.jp/pathway/map05320+	no
Galactose metabolism	map00052	0	31	94	8879	1	1	-	.	0	.	0	http://www.kegg.jp/pathway/map00052+	no
Ascorbate and aldarate metabolism	map00053	0	33	94	8877	1	1	-	.	0	.	0	http://www.kegg.jp/pathway/map00053+	no
Glycosylphosphatidylinositol (GPI)-anchor biosynthesis	map00563	0	32	94	8878	1	1	-	.	0	.	0	http://www.kegg.jp/pathway/map00563+	no
HIF-1 signaling pathway	map04066	2	138	92	8772	0.431256	1	gene21350|K05087;gene3640|K05121	gene21350|K05087;gene3640|K05121	2	.	0	http://www.kegg.jp/pathway/map04066+K05087+K05121	no
Chemical carcinogenesis	map05204	0	86	94	8824	1	1	-	.	0	.	0	http://www.kegg.jp/pathway/map05204+	no
Osteoclast differentiation	map04380	2	131	92	8779	0.405872	1	gene569|K11217;gene7752|K04576	gene7752|K04576	1	gene569|K11217	1	http://www.kegg.jp/pathway/map04380+K11217+K04576	no
Riboflavin metabolism	map00740	0	13	94	8897	1	1	-	.	0	.	0	http://www.kegg.jp/pathway/map00740+	no
Maturity onset diabetes of the young	map04950	0	22	94	8888	1	1	-	.	0	.	0	http://www.kegg.jp/pathway/map04950+	no
Tight junction	map04530	2	139	92	8771	0.434837	1	gene7914|K04630;gene7918|K05629	gene7914|K04630;gene7918|K05629	2	.	0	http://www.kegg.jp/pathway/map04530+K04630+K05629	no
Starch and sucrose metabolism	map00500	0	64	94	8846	1	1	-	.	0	.	0	http://www.kegg.jp/pathway/map00500+	no
DNA replication	map03030	0	46	94	8864	1	1	-	.	0	.	0	http://www.kegg.jp/pathway/map03030+	no
Histidine metabolism	map00340	0	25	94	8885	1	1	-	.	0	.	0	http://www.kegg.jp/pathway/map00340+	no
PPAR signaling pathway	map03320	0	69	94	8841	1	1	-	.	0	.	0	http://www.kegg.jp/pathway/map03320+	no
Biosynthesis of amino acids	map01230	0	93	94	8817	1	1	-	.	0	.	0	http://www.kegg.jp/pathway/map01230+	no
Hematopoietic cell lineage	map04640	0	86	94	8824	1	1	-	.	0	.	0	http://www.kegg.jp/pathway/map04640+	no
Apoptosis	map04210	0	105	94	8805	1	1	-	.	0	.	0	http://www.kegg.jp/pathway/map04210+	no
Long-term potentiation	map04720	1	70	93	8840	0.526711	1	gene3389|K04634	.	0	gene3389|K04634	1	http://www.kegg.jp/pathway/map04720+K04634	no
Amphetamine addiction	map05031	1	70	93	8840	0.526711	1	gene3953|K04450	gene3953|K04450	1	.	0	http://www.kegg.jp/pathway/map05031+K04450	no
Legionellosis	map05134	0	113	94	8797	1	1	-	.	0	.	0	http://www.kegg.jp/pathway/map05134+	no
Steroid biosynthesis	map00100	0	18	94	8892	1	1	-	.	0	.	0	http://www.kegg.jp/pathway/map00100+	no
Pertussis	map05133	1	85	93	8825	0.596207	1	gene7914|K04630	gene7914|K04630	1	.	0	http://www.kegg.jp/pathway/map05133+K04630	no
Allograft rejection	map05330	0	37	94	8873	1	1	-	.	0	.	0	http://www.kegg.jp/pathway/map05330+	no
Graft-versus-host disease	map05332	0	32	94	8878	1	1	-	.	0	.	0	http://www.kegg.jp/pathway/map05332+	no
Homologous recombination	map03440	0	30	94	8880	1	1	-	.	0	.	0	http://www.kegg.jp/pathway/map03440+	no
Ubiquinone and other terpenoid-quinone biosynthesis	map00130	0	12	94	8898	1	1	-	.	0	.	0	http://www.kegg.jp/pathway/map00130+	no
Terpenoid backbone biosynthesis	map00900	0	24	94	8886	1	1	-	.	0	.	0	http://www.kegg.jp/pathway/map00900+	no
Glycosaminoglycan biosynthesis - heparan sulfate / heparin	map00534	0	24	94	8886	1	1	-	.	0	.	0	http://www.kegg.jp/pathway/map00534+	no
Glycosaminoglycan biosynthesis - keratan sulfate	map00533	0	16	94	8894	1	1	-	.	0	.	0	http://www.kegg.jp/pathway/map00533+	no
Glycosaminoglycan biosynthesis - chondroitin sulfate / dermatan sulfate	map00532	0	21	94	8889	1	1	-	.	0	.	0	http://www.kegg.jp/pathway/map00532+	no
Basal transcription factors	map03022	0	59	94	8851	1	1	-	.	0	.	0	http://www.kegg.jp/pathway/map03022+	no
RNA polymerase	map03020	0	30	94	8880	1	1	-	.	0	.	0	http://www.kegg.jp/pathway/map03020+	no
Prolactin signaling pathway	map04917	1	75	93	8835	0.551099	1	gene11746|K03099	gene11746|K03099	1	gene11746|K03099	1	http://www.kegg.jp/pathway/map04917+K03099	no
Pyruvate metabolism	map00620	0	50	94	8860	1	1	-	.	0	.	0	http://www.kegg.jp/pathway/map00620+	no
Metabolism of xenobiotics by cytochrome P450	map00980	0	90	94	8820	1	1	-	.	0	.	0	http://www.kegg.jp/pathway/map00980+	no
Drug metabolism - cytochrome P450	map00982	0	80	94	8830	1	1	-	.	0	.	0	http://www.kegg.jp/pathway/map00982+	no
Drug metabolism - other enzymes	map00983	0	54	94	8856	1	1	-	.	0	.	0	http://www.kegg.jp/pathway/map00983+	no
Pentose phosphate pathway	map00030	0	39	94	8871	1	1	-	.	0	.	0	http://www.kegg.jp/pathway/map00030+	no
Prion diseases	map05020	0	34	94	8876	1	1	-	.	0	.	0	http://www.kegg.jp/pathway/map05020+	no
mTOR signaling pathway	map04150	0	89	94	8821	1	1	-	.	0	.	0	http://www.kegg.jp/pathway/map04150+	no
Circadian rhythm - fly	map04711	0	10	94	8900	1	1	-	.	0	.	0	http://www.kegg.jp/pathway/map04711+	no
Circadian rhythm	map04710	1	41	93	8869	0.357114	1	gene20142|K03362	.	0	gene20142|K03362	1	http://www.kegg.jp/pathway/map04710+K03362	no
Vasopressin-regulated water reabsorption	map04962	0	54	94	8856	1	1	-	.	0	.	0	http://www.kegg.jp/pathway/map04962+	no
Collecting duct acid secretion	map04966	0	28	94	8882	1	1	-	.	0	.	0	http://www.kegg.jp/pathway/map04966+	no
Nucleotide excision repair	map03420	1	51	93	8859	0.421481	1	gene28104|K10609	.	0	gene28104|K10609	1	http://www.kegg.jp/pathway/map03420+K10609	no
Retinol metabolism	map00830	0	71	94	8839	1	1	-	.	0	.	0	http://www.kegg.jp/pathway/map00830+	no
Ribosome biogenesis in eukaryotes	map03008	2	121	92	8789	0.368732	1	gene12593|K14572;gene28151|K14567	gene12593|K14572	1	gene28151|K14567	1	http://www.kegg.jp/pathway/map03008+K14572+K14567	no
Neurotrophin signaling pathway	map04722	1	124	93	8786	0.733132	1	gene11746|K03099	gene11746|K03099	1	gene11746|K03099	1	http://www.kegg.jp/pathway/map04722+K03099	no
Phenylalanine metabolism	map00360	0	28	94	8882	1	1	-	.	0	.	0	http://www.kegg.jp/pathway/map00360+	no
Glycine, serine and threonine metabolism	map00260	0	50	94	8860	1	1	-	.	0	.	0	http://www.kegg.jp/pathway/map00260+	no
Small cell lung cancer	map05222	1	119	93	8791	0.718551	1	gene25348|K16063	.	0	gene25348|K16063	1	http://www.kegg.jp/pathway/map05222+K16063	no
Non-small cell lung cancer	map05223	1	56	93	8854	0.451229	1	gene11746|K03099	gene11746|K03099	1	gene11746|K03099	1	http://www.kegg.jp/pathway/map05223+K03099	no
Aminoacyl-tRNA biosynthesis	map00970	0	49	94	8861	1	1	-	.	0	.	0	http://www.kegg.jp/pathway/map00970+	no
Tyrosine metabolism	map00350	0	43	94	8867	1	1	-	.	0	.	0	http://www.kegg.jp/pathway/map00350+	no
Polyketide sugar unit biosynthesis	map00523	0	1	94	8909	1	1	-	.	0	.	0	http://www.kegg.jp/pathway/map00523+	no
Amino sugar and nucleotide sugar metabolism	map00520	0	55	94	8855	1	1	-	.	0	.	0	http://www.kegg.jp/pathway/map00520+	no
Thiamine metabolism	map00730	0	4	94	8906	1	1	-	.	0	.	0	http://www.kegg.jp/pathway/map00730+	no
Neomycin, kanamycin and gentamicin biosynthesis	map00524	0	6	94	8904	1	1	-	.	0	.	0	http://www.kegg.jp/pathway/map00524+	no
Proteasome	map03050	0	53	94	8857	1	1	-	.	0	.	0	http://www.kegg.jp/pathway/map03050+	no
Staphylococcus aureus infection	map05150	0	54	94	8856	1	1	-	.	0	.	0	http://www.kegg.jp/pathway/map05150+	no
Fc epsilon RI signaling pathway	map04664	1	66	93	8844	0.50626	1	gene11746|K03099	gene11746|K03099	1	gene11746|K03099	1	http://www.kegg.jp/pathway/map04664+K03099	no
Tuberculosis	map05152	2	199	92	8711	0.624633	1	gene12205|K13377;gene569|K11217	.	0	gene12205|K13377;gene569|K11217	2	http://www.kegg.jp/pathway/map05152+K13377+K11217	no
Taurine and hypotaurine metabolism	map00430	0	11	94	8899	1	1	-	.	0	.	0	http://www.kegg.jp/pathway/map00430+	no
B cell receptor signaling pathway	map04662	1	69	93	8841	0.521678	1	gene11746|K03099	gene11746|K03099	1	gene11746|K03099	1	http://www.kegg.jp/pathway/map04662+K03099	no
Phagosome	map04145	0	162	94	8748	1	1	-	.	0	.	0	http://www.kegg.jp/pathway/map04145+	no
Notch signaling pathway	map04330	0	59	94	8851	1	1	-	.	0	.	0	http://www.kegg.jp/pathway/map04330+	no
Autophagy	map04140	0	35	94	8875	1	1	-	.	0	.	0	http://www.kegg.jp/pathway/map04140+	no
Lysosome	map04142	2	133	92	8777	0.41318	1	gene10859|K12384;gene11193|K01135	.	0	gene10859|K12384;gene11193|K01135	2	http://www.kegg.jp/pathway/map04142+K12384+K01135	no
Alzheimer's disease	map05010	2	236	92	8674	0.715253	1	gene3389|K04634;gene5660|K08860	gene5660|K08860	1	gene3389|K04634	1	http://www.kegg.jp/pathway/map05010+K04634+K08860	no
Parkinson's disease	map05012	1	204	93	8706	0.886538	1	gene2702|K04555	gene2702|K04555	1	.	0	http://www.kegg.jp/pathway/map05012+K04555	no
Amyotrophic lateral sclerosis (ALS)	map05014	0	67	94	8843	1	1	-	.	0	.	0	http://www.kegg.jp/pathway/map05014+	no
Huntington's disease	map05016	1	271	93	8639	0.944901	1	gene3389|K04634	.	0	gene3389|K04634	1	http://www.kegg.jp/pathway/map05016+K04634	no
Primary bile acid biosynthesis	map00120	0	15	94	8895	1	1	-	.	0	.	0	http://www.kegg.jp/pathway/map00120+	no
Asthma	map05310	0	23	94	8887	1	1	-	.	0	.	0	http://www.kegg.jp/pathway/map05310+	no
Acute myeloid leukemia	map05221	1	61	93	8849	0.479464	1	gene11746|K03099	gene11746|K03099	1	gene11746|K03099	1	http://www.kegg.jp/pathway/map05221+K03099	no
Natural killer cell mediated cytotoxicity	map04650	2	130	92	8780	0.402203	1	gene11746|K03099;gene23885|K04409	gene11746|K03099	1	gene11746|K03099;gene23885|K04409	2	http://www.kegg.jp/pathway/map04650+K03099+K04409	no
Alanine, aspartate and glutamate metabolism	map00250	0	42	94	8868	1	1	-	.	0	.	0	http://www.kegg.jp/pathway/map00250+	no
Glutathione metabolism	map00480	0	64	94	8846	1	1	-	.	0	.	0	http://www.kegg.jp/pathway/map00480+	no
Sulfur metabolism	map00920	0	16	94	8894	1	1	-	.	0	.	0	http://www.kegg.jp/pathway/map00920+	no
Propanoate metabolism	map00640	0	37	94	8873	1	1	-	.	0	.	0	http://www.kegg.jp/pathway/map00640+	no
Spliceosome	map03040	0	246	94	8664	1	1	-	.	0	.	0	http://www.kegg.jp/pathway/map03040+	no
Type II diabetes mellitus	map04930	0	45	94	8865	1	1	-	.	0	.	0	http://www.kegg.jp/pathway/map04930+	no
Intestinal immune network for IgA production	map04672	0	42	94	8868	1	1	-	.	0	.	0	http://www.kegg.jp/pathway/map04672+	no
Phenylalanine, tyrosine and tryptophan biosynthesis	map00400	0	6	94	8904	1	1	-	.	0	.	0	http://www.kegg.jp/pathway/map00400+	no
Leukocyte transendothelial migration	map04670	2	124	92	8786	0.379973	1	gene21699|K13709;gene7914|K04630	gene21699|K13709;gene7914|K04630	2	.	0	http://www.kegg.jp/pathway/map04670+K13709+K04630	no
Herpes simplex infection	map05168	3	259	91	8651	0.518515	1	gene11640|K16196;gene5660|K08860;gene569|K11217	gene5660|K08860	1	gene11640|K16196;gene569|K11217	2	http://www.kegg.jp/pathway/map05168+K16196+K08860+K11217	no
Glycolysis / Gluconeogenesis	map00010	1	85	93	8825	0.596207	1	gene11305|K08074	gene11305|K08074	1	.	0	http://www.kegg.jp/pathway/map00010+K08074	no
Folate biosynthesis	map00790	0	14	94	8896	1	1	-	.	0	.	0	http://www.kegg.jp/pathway/map00790+	no
Vitamin B6 metabolism	map00750	0	11	94	8899	1	1	-	.	0	.	0	http://www.kegg.jp/pathway/map00750+	no
Bile secretion	map04976	1	106	93	8804	0.676847	1	gene10807|K13575	.	0	gene10807|K13575	1	http://www.kegg.jp/pathway/map04976+K13575	no
Glycosphingolipid biosynthesis - globo and isoglobo series	map00603	0	18	94	8892	1	1	-	.	0	.	0	http://www.kegg.jp/pathway/map00603+	no
2-Oxocarboxylic acid metabolism	map01210	0	21	94	8889	1	1	-	.	0	.	0	http://www.kegg.jp/pathway/map01210+	no
Phototransduction	map04744	0	25	94	8885	1	1	-	.	0	.	0	http://www.kegg.jp/pathway/map04744+	no
alpha-Linolenic acid metabolism	map00592	0	29	94	8881	1	1	-	.	0	.	0	http://www.kegg.jp/pathway/map00592+	no
Adipocytokine signaling pathway	map04920	0	72	94	8838	1	1	-	.	0	.	0	http://www.kegg.jp/pathway/map04920+	no
Lysine biosynthesis	map00300	0	4	94	8906	1	1	-	.	0	.	0	http://www.kegg.jp/pathway/map00300+	no
Steroid hormone biosynthesis	map00140	0	62	94	8848	1	1	-	.	0	.	0	http://www.kegg.jp/pathway/map00140+	no
Valine, leucine and isoleucine biosynthesis	map00290	0	3	94	8907	1	1	-	.	0	.	0	http://www.kegg.jp/pathway/map00290+	no
beta-Alanine metabolism	map00410	0	40	94	8870	1	1	-	.	0	.	0	http://www.kegg.jp/pathway/map00410+	no
Aldosterone-regulated sodium reabsorption	map04960	0	41	94	8869	1	1	-	.	0	.	0	http://www.kegg.jp/pathway/map04960+	no
Fatty acid biosynthesis	map00061	0	7	94	8903	1	1	-	.	0	.	0	http://www.kegg.jp/pathway/map00061+	no
Sulfur relay system	map04122	0	14	94	8896	1	1	-	.	0	.	0	http://www.kegg.jp/pathway/map04122+	no
Glyoxylate and dicarboxylate metabolism	map00630	0	34	94	8876	1	1	-	.	0	.	0	http://www.kegg.jp/pathway/map00630+	no
Metabolic pathways	map01100	11	1404	83	7506	0.891919	1	gene10392|K00022;gene11193|K01135;gene11305|K08074;gene17421|K00721;gene1864|K03792;gene25166|K00710;gene27269|K01937;gene3042|K05607;gene3920|K00803;gene8252|K14157;gene8631|K00710	gene10392|K00022;gene11305|K08074;gene17421|K00721;gene1864|K03792;gene27269|K01937;gene8252|K14157;gene8631|K00710	7	gene11193|K01135;gene25166|K00710;gene27269|K01937;gene3042|K05607;gene3920|K00803	5	http://www.kegg.jp/pathway/map01100+K00022+K01135+K08074+K00721+K03792+K00710+K01937+K05607+K00803+K14157+K00710	no
Citrate cycle (TCA cycle)	map00020	0	39	94	8871	1	1	-	.	0	.	0	http://www.kegg.jp/pathway/map00020+	no
Systemic lupus erythematosus	map05322	0	128	94	8782	1	1	-	.	0	.	0	http://www.kegg.jp/pathway/map05322+	no
Inositol phosphate metabolism	map00562	0	62	94	8848	1	1	-	.	0	.	0	http://www.kegg.jp/pathway/map00562+	no
Biotin metabolism	map00780	0	4	94	8906	1	1	-	.	0	.	0	http://www.kegg.jp/pathway/map00780+	no
Lipoic acid metabolism	map00785	0	3	94	8907	1	1	-	.	0	.	0	http://www.kegg.jp/pathway/map00785+	no
Porphyrin and chlorophyll metabolism	map00860	0	94	94	8816	1	1	-	.	0	.	0	http://www.kegg.jp/pathway/map00860+	no
