# Supplementary material for: Transcriptomic Analysis Reveals Differentially Expressed Circular RNAs Associated with Fecundity in the Sheep Hypothalamus with Different FecB Genotypes
Source: Animals (Basel). 2024 Jan 7;14(2):198. doi: 10.3390/ani14020198 (PMC10812736; doi:10.3390/ani14020198)
Supplement: Supplementary file 1 [file animals-14-00198-s001.zip › Table S6 Bioinformatic analysis of circRNA-miRNA.xlsx]

## Sheet: BB_F_H_BB_L_H
Table S6 Bioinformatic analysis of circRNA-miRNA
miRNA	circRNA
oar-miR-665-3p	oar_circ_0000666
oar-miR-665-3p	oar_circ_0000667
oar-miR-665-3p	oar_circ_0000669
oar-miR-665-3p	oar_circ_0000671
oar-miR-665-3p	oar_circ_0000673
oar-miR-665-3p	oar_circ_0000674
oar-miR-665-3p	oar_circ_0000675
oar-miR-665-3p	oar_circ_0000676
oar-miR-26a	oar_circ_0001867
oar-miR-181a	oar_circ_0004729
oar-miR-181a	oar_circ_0004730
oar-miR-654-3p	oar_circ_0005177
oar-miR-654-3p	oar_circ_0005178
oar-miR-150	oar_circ_0006615
oar-miR-495-5p	oar_circ_0007200
oar-miR-21	oar_circ_0008053
oar-miR-370-3p	oar_circ_0008905
oar-miR-370-3p	oar_circ_0008908
oar-miR-370-3p	oar_circ_0008912
oar-miR-541-5p	oar_circ_0010819
oar-miR-541-5p	oar_circ_0010820
oar-miR-221	oar_circ_0011212
oar-miR-221	oar_circ_0011214
oar-miR-27a	oar_circ_0011374
oar-miR-27a	oar_circ_0011375
oar-miR-370-3p	oar_circ_0011938
oar-miR-362	oar_circ_0012486
oar-miR-200c	oar_circ_0013201
oar-miR-432	oar_circ_0013772
oar-miR-432	oar_circ_0013774
oar-miR-432	oar_circ_0013776
oar-miR-432	oar_circ_0013777
oar-miR-26a	oar_circ_0013808
oar-miR-26b	oar_circ_0013808
oar-miR-410-5p	oar_circ_0015604
oar-miR-410-5p	oar_circ_0015605
oar-miR-410-5p	oar_circ_0015606
oar-miR-410-5p	oar_circ_0015607
oar-miR-410-5p	oar_circ_0015608
oar-miR-410-5p	oar_circ_0015609
oar-miR-487b-5p	oar_circ_0017916
oar-miR-544-3p	oar_circ_0018374
oar-miR-544-3p	oar_circ_0018377
oar-miR-544-3p	oar_circ_0018378
oar-miR-544-3p	oar_circ_0018379
oar-miR-544-3p	oar_circ_0018380
oar-miR-370-3p	oar_circ_0019598
oar-miR-23a	oar_circ_0021223
oar-miR-329b-5p	oar_circ_0022553
oar-miR-329b-5p	oar_circ_0022558
oar-miR-539-3p	oar_circ_0023217
oar-miR-432	oar_circ_0024557
oar-miR-27a	oar_circ_0025933
oar-miR-152	oar_circ_0028778
oar-miR-329a-5p	oar_circ_0030891
oar-miR-362	oar_circ_0030891
oar-miR-665-5p	oar_circ_0031022
oar-miR-152	oar_circ_0031267
oar-miR-539-5p	oar_circ_0031743
oar-miR-539-5p	oar_circ_0031763
oar-miR-539-5p	oar_circ_0031765
oar-miR-539-5p	oar_circ_0031768
oar-miR-539-5p	oar_circ_0031782
oar-miR-539-5p	oar_circ_0031783
oar-miR-412-3p	oar_circ_0032485
oar-miR-412-3p	oar_circ_0032486
oar-miR-494-3p	oar_circ_0037169
oar-miR-411b-5p	oar_circ_0038818

## Sheet: BB_F_H_WW_F_H
miRNA	circRNA
oar-miR-29b	oar_circ_0000393
oar-miR-665-3p	oar_circ_0000666
oar-miR-665-3p	oar_circ_0000667
oar-miR-665-3p	oar_circ_0000669
oar-miR-665-3p	oar_circ_0000670
oar-miR-665-3p	oar_circ_0000671
oar-miR-665-3p	oar_circ_0000673
oar-miR-665-3p	oar_circ_0000674
oar-miR-665-3p	oar_circ_0000675
oar-miR-665-3p	oar_circ_0000676
oar-miR-26a	oar_circ_0001867
oar-miR-181a	oar_circ_0004722
oar-miR-181a	oar_circ_0004729
oar-miR-654-3p	oar_circ_0005178
oar-miR-654-3p	oar_circ_0005822
oar-miR-495-5p	oar_circ_0007196
oar-miR-495-5p	oar_circ_0007200
oar-miR-21	oar_circ_0008053
oar-miR-370-3p	oar_circ_0008905
oar-miR-370-3p	oar_circ_0008907
oar-miR-370-3p	oar_circ_0008908
oar-miR-370-3p	oar_circ_0008912
oar-miR-493-3p	oar_circ_0010785
oar-miR-541-5p	oar_circ_0010819
oar-miR-541-5p	oar_circ_0010820
oar-miR-221	oar_circ_0011212
oar-miR-27a	oar_circ_0011374
oar-miR-27a	oar_circ_0011375
oar-miR-27a	oar_circ_0011376
oar-miR-370-3p	oar_circ_0011938
oar-miR-362	oar_circ_0012486
oar-miR-200c	oar_circ_0013201
oar-miR-432	oar_circ_0013772
oar-miR-432	oar_circ_0013774
oar-miR-432	oar_circ_0013776
oar-miR-432	oar_circ_0013777
oar-miR-26a	oar_circ_0013808
oar-miR-26b	oar_circ_0013808
oar-miR-433-3p	oar_circ_0013960
oar-miR-410-5p	oar_circ_0015604
oar-miR-410-5p	oar_circ_0015606
oar-miR-410-5p	oar_circ_0015607
oar-miR-410-5p	oar_circ_0015608
oar-miR-487b-5p	oar_circ_0017916
oar-miR-544-3p	oar_circ_0018374
oar-miR-544-3p	oar_circ_0018377
oar-miR-544-3p	oar_circ_0018378
oar-miR-544-3p	oar_circ_0018379
oar-miR-544-3p	oar_circ_0018380
oar-miR-370-3p	oar_circ_0019598
oar-miR-370-3p	oar_circ_0019599
oar-miR-23a	oar_circ_0021223
oar-miR-329b-5p	oar_circ_0022553
oar-miR-329b-5p	oar_circ_0022557
oar-miR-329b-5p	oar_circ_0022558
oar-miR-539-3p	oar_circ_0023217
oar-miR-432	oar_circ_0024557
oar-miR-27a	oar_circ_0025933
oar-miR-154b-5p	oar_circ_0028513
oar-miR-152	oar_circ_0028778
oar-miR-329b-5p	oar_circ_0028815
oar-miR-329a-5p	oar_circ_0030891
oar-miR-362	oar_circ_0030891
oar-miR-665-5p	oar_circ_0031022
oar-miR-3956-5p	oar_circ_0031096
oar-miR-3956-5p	oar_circ_0031098
oar-miR-152	oar_circ_0031267
oar-miR-539-5p	oar_circ_0031743
oar-miR-539-5p	oar_circ_0031763
oar-miR-539-5p	oar_circ_0031765
oar-miR-539-5p	oar_circ_0031768
oar-miR-539-5p	oar_circ_0031782
oar-miR-412-3p	oar_circ_0032485
oar-miR-412-3p	oar_circ_0032486
oar-miR-654-5p	oar_circ_0034355
oar-miR-494-3p	oar_circ_0037169
oar-miR-154b-3p	oar_circ_0037948
oar-miR-411b-5p	oar_circ_0038818

## Sheet: BB_L_H_WW_L_H
miRNA	circRNA
oar-miR-665-3p	oar_circ_0000666
oar-miR-665-3p	oar_circ_0000667
oar-miR-665-3p	oar_circ_0000668
oar-miR-665-3p	oar_circ_0000669
oar-miR-665-3p	oar_circ_0000673
oar-miR-665-3p	oar_circ_0000674
oar-miR-665-3p	oar_circ_0000675
oar-miR-665-3p	oar_circ_0000676
oar-miR-26a	oar_circ_0001867
oar-miR-181a	oar_circ_0004729
oar-miR-181a	oar_circ_0004730
oar-miR-654-3p	oar_circ_0005177
oar-miR-654-3p	oar_circ_0005178
oar-miR-654-3p	oar_circ_0005822
oar-miR-150	oar_circ_0006615
oar-miR-495-5p	oar_circ_0007200
oar-miR-21	oar_circ_0008053
oar-miR-370-3p	oar_circ_0008908
oar-miR-370-3p	oar_circ_0008909
oar-miR-3957-5p	oar_circ_0009617
oar-miR-541-5p	oar_circ_0010820
oar-miR-221	oar_circ_0011212
oar-miR-221	oar_circ_0011214
oar-miR-27a	oar_circ_0011375
oar-miR-370-3p	oar_circ_0011939
oar-miR-362	oar_circ_0012487
oar-miR-200c	oar_circ_0013201
oar-miR-432	oar_circ_0013772
oar-miR-432	oar_circ_0013773
oar-miR-432	oar_circ_0013774
oar-miR-432	oar_circ_0013775
oar-miR-432	oar_circ_0013776
oar-miR-432	oar_circ_0013777
oar-miR-410-5p	oar_circ_0015604
oar-miR-410-5p	oar_circ_0015605
oar-miR-410-5p	oar_circ_0015606
oar-miR-410-5p	oar_circ_0015607
oar-miR-410-5p	oar_circ_0015608
oar-miR-410-5p	oar_circ_0015609
oar-miR-544-3p	oar_circ_0018377
oar-miR-544-3p	oar_circ_0018379
oar-miR-23a	oar_circ_0021223
oar-miR-329b-5p	oar_circ_0022553
oar-miR-329b-5p	oar_circ_0022558
oar-miR-432	oar_circ_0024557
oar-miR-27a	oar_circ_0025933
oar-miR-665-5p	oar_circ_0031022
oar-miR-3956-5p	oar_circ_0031096
oar-miR-3956-5p	oar_circ_0031097
oar-miR-3956-5p	oar_circ_0031098
oar-miR-152	oar_circ_0031267
oar-miR-152	oar_circ_0031268
oar-miR-539-5p	oar_circ_0031743
oar-miR-539-5p	oar_circ_0031763
oar-miR-539-5p	oar_circ_0031765
oar-miR-539-5p	oar_circ_0031768
oar-miR-539-5p	oar_circ_0031782
oar-miR-539-5p	oar_circ_0031783
oar-miR-412-3p	oar_circ_0032485
oar-miR-412-3p	oar_circ_0032486
oar-miR-494-3p	oar_circ_0037170
oar-miR-494-3p	oar_circ_0037171
oar-miR-411b-5p	oar_circ_0038818
oar-miR-411b-5p	oar_circ_0038819

## Sheet: WW_F_H_WW_L_H
miRNA	circRNA
oar-miR-29b	oar_circ_0000393
oar-miR-665-3p	oar_circ_0000666
oar-miR-665-3p	oar_circ_0000667
oar-miR-665-3p	oar_circ_0000668
oar-miR-665-3p	oar_circ_0000669
oar-miR-665-3p	oar_circ_0000670
oar-miR-665-3p	oar_circ_0000671
oar-miR-665-3p	oar_circ_0000673
oar-miR-665-3p	oar_circ_0000674
oar-miR-665-3p	oar_circ_0000675
oar-miR-665-3p	oar_circ_0000676
oar-miR-26a	oar_circ_0001867
oar-miR-181a	oar_circ_0004722
oar-miR-181a	oar_circ_0004729
oar-miR-654-3p	oar_circ_0005178
oar-miR-654-3p	oar_circ_0005822
oar-miR-495-5p	oar_circ_0007196
oar-miR-495-5p	oar_circ_0007200
oar-miR-21	oar_circ_0008053
oar-miR-370-3p	oar_circ_0008907
oar-miR-370-3p	oar_circ_0008908
oar-miR-370-3p	oar_circ_0008909
oar-miR-3957-5p	oar_circ_0009617
oar-miR-493-3p	oar_circ_0010785
oar-miR-541-5p	oar_circ_0010820
oar-miR-221	oar_circ_0011212
oar-miR-27a	oar_circ_0011375
oar-miR-27a	oar_circ_0011376
oar-miR-370-3p	oar_circ_0011939
oar-miR-362	oar_circ_0012487
oar-miR-200c	oar_circ_0013201
oar-miR-432	oar_circ_0013772
oar-miR-432	oar_circ_0013773
oar-miR-432	oar_circ_0013774
oar-miR-432	oar_circ_0013775
oar-miR-432	oar_circ_0013776
oar-miR-432	oar_circ_0013777
oar-miR-433-3p	oar_circ_0013960
oar-miR-410-5p	oar_circ_0015604
oar-miR-410-5p	oar_circ_0015606
oar-miR-410-5p	oar_circ_0015607
oar-miR-410-5p	oar_circ_0015608
oar-miR-544-3p	oar_circ_0018379
oar-miR-370-3p	oar_circ_0019599
oar-miR-23a	oar_circ_0021223
oar-miR-329b-5p	oar_circ_0022553
oar-miR-329b-5p	oar_circ_0022557
oar-miR-329b-5p	oar_circ_0022558
oar-miR-539-3p	oar_circ_0023217
oar-miR-432	oar_circ_0024557
oar-miR-27a	oar_circ_0025933
oar-miR-154b-5p	oar_circ_0028513
oar-miR-329b-5p	oar_circ_0028815
oar-miR-329a-5p	oar_circ_0030891
oar-miR-362	oar_circ_0030891
oar-miR-665-5p	oar_circ_0031022
oar-miR-3956-5p	oar_circ_0031096
oar-miR-3956-5p	oar_circ_0031097
oar-miR-3956-5p	oar_circ_0031098
oar-miR-152	oar_circ_0031267
oar-miR-152	oar_circ_0031268
oar-miR-539-5p	oar_circ_0031743
oar-miR-539-5p	oar_circ_0031763
oar-miR-539-5p	oar_circ_0031765
oar-miR-539-5p	oar_circ_0031768
oar-miR-539-5p	oar_circ_0031782
oar-miR-539-5p	oar_circ_0031783
oar-miR-412-3p	oar_circ_0032485
oar-miR-412-3p	oar_circ_0032486
oar-miR-654-5p	oar_circ_0034355
oar-miR-494-3p	oar_circ_0037170
oar-miR-494-3p	oar_circ_0037171
oar-miR-154b-3p	oar_circ_0037948
oar-miR-411b-5p	oar_circ_0038818
oar-miR-411b-5p	oar_circ_0038819
